# Supplementary material for: m6A Reader: Epitranscriptome Target Prediction and Functional Characterization of N6-Methyladenosine (m6A) Readers
Source: Front Cell Dev Biol. 2020 Aug 11;8:741. doi: 10.3389/fcell.2020.00741 (PMC7431669; doi:10.3389/fcell.2020.00741)
Supplement: Supplementary file 1 [file Table_1.XLSX]

## Sheet: YTHDC1
Category	Term	Count	%	PValue	Genes	List Total	Pop Hits	Pop Total	Fold Enrichment	Bonferroni	Benjamini	FDR
GOTERM_MF_DIRECT	GO:0044822~poly(A) RNA binding	702	14.8697	1.37915e-100	8880, 7205, 80742, 84273, 8886, 140890, 23518, 10992, 10898, 51377, 8125, 26608, 55379, 1729, 11097, 2011, 22803, 79080, 6780, 55226, 27079, 63931, 51163, 7343, 85476, 2023, 7203, 5216, 11083, 8243, 55920, 84295, 1431, 22919, 8761, 310, 821, 55922, 7332, 6749, 8446, 811, 23524, 10885, 23521, 328, 226, 10884, 284695, 51386, 22907, 7317, 7316, 51388, 10075, 5339, 88745, 1832, 908, 2962, 22916, 8545…	4211	1060	11857	1.86475	2.94035e-97	2.94035e-97	2.3889e-97
UP_KEYWORDS	Acetylation	1585	33.5734	2.14604e-97	5373, 10992, 6491, 2950, 1822, 2957, 2956, 6093, 8216, 23644, 3297, 5358, 10092, 10097, 84897, 1810, 546, 10094, 8209, 8243, 23636, 1434, 1431, 51496, 22919, 51499, 23633, 6894, 513, 6888, 1841, 84886, 6470, 22928, 5347, 6472, 515, 1445, 401505, 79832, 128866, 10078, 90268, 5339, 10075, 522, 521, 6897, 523, 908, 2962, 2960, 22916, 203068, 987, 10952, 5332, 983, 84861, 26190, 29957, 10061, 2107, 6…	4583	3156	13285	1.45581	1.24685e-94	1.24685e-94	3.15557e-94
UP_KEYWORDS	Phosphoprotein	2956	62.6139	3.87024e-80	23654, 79807, 63922, 6874, 29028, 10992, 23650, 949, 22905, 26608, 22906, 6491, 2950, 535, 63916, 1822, 25792, 2957, 2956, 6498, 537, 84079, 6497, 1829, 6495, 6093, 23647, 6091, 90624, 23645, 6883, 6885, 23644, 25788, 29035, 3297, 23640, 79813, 6879, 5358, 29903, 84897, 6875, 546, 1810, 10094, 219899, 80723, 80727, 23636, 8243, 23637, 1434, 51496, 22919, 6895, 5352, 23633, 57223, 6894, 1843, 6888…	4583	7078	13285	1.21061	2.24861e-77	1.12431e-77	5.69088e-77
UP_KEYWORDS	Nucleus	1937	41.0294	3.68466e-69	3280, 63922, 6874, 3281, 29028, 10992, 25799, 22906, 22903, 2950, 25793, 1822, 25792, 22900, 2957, 2956, 6497, 2958, 6495, 6493, 6883, 23644, 25788, 23641, 3297, 79813, 6879, 29903, 84897, 6875, 546, 1810, 149603, 8243, 23636, 1434, 51497, 6895, 57223, 1843, 2976, 2971, 22926, 5347, 6472, 1847, 1845, 79830, 79833, 128866, 100101467, 23623, 10075, 1831, 84874, 6899, 2962, 22916, 2960, 136647, 2968…	4583	4300	13285	1.30579	2.14079e-66	7.13595e-67	5.41799e-66
GOTERM_CC_DIRECT	GO:0005654~nucleoplasm	1266	26.8164	1.07185e-67	3280, 63922, 140890, 332, 6874, 3281, 29028, 330, 10992, 23650, 22905, 535, 1822, 79084, 146956, 22900, 2957, 2956, 6498, 6497, 10713, 2958, 6493, 8021, 204851, 8405, 55226, 8028, 6883, 23644, 149420, 25788, 3297, 79813, 6879, 29903, 7345, 7342, 10721, 7343, 6875, 10725, 339487, 149603, 10728, 8243, 55215, 84295, 1434, 51497, 51496, 8036, 23633, 57223, 55922, 10730, 2976, 2971, 5347, 7336, 22926,…	4343	2544	12453	1.42692	1.21762e-64	1.21762e-64	1.72101e-64
UP_KEYWORDS	Isopeptide bond	601	12.7304	3.27891e-64	805, 801, 10992, 197407, 3480, 1729, 25792, 29128, 6498, 605, 2017, 204851, 26009, 8028, 6885, 207, 208, 3297, 79813, 2, 5358, 546, 8312, 10725, 149603, 402, 7203, 5216, 55215, 84295, 7227, 27089, 55922, 513, 8301, 5347, 6748, 150468, 6744, 90933, 79830, 23522, 226, 7316, 23528, 10743, 6897, 55388, 339318, 7324, 388569, 203068, 808, 85236, 7597, 988, 55900, 6599, 55133, 10951, 57584, 983, 7391, 9…	4583	1008	13285	1.72833	1.90505e-61	4.76262e-62	4.82138e-61
UP_KEYWORDS	Ubl conjugation	802	16.9879	3.1405e-56	332, 3476, 330, 10992, 22905, 6491, 3480, 25792, 8737, 6498, 6495, 204851, 6091, 23645, 8028, 6885, 3297, 79813, 10092, 84897, 8724, 546, 10725, 149603, 84085, 55215, 84295, 163786, 55922, 7332, 5347, 10733, 8445, 79830, 328, 329, 128866, 221927, 324, 7317, 7316, 23623, 90268, 85458, 10743, 84876, 6897, 7324, 203068, 85236, 527, 7597, 988, 55900, 55905, 10951, 983, 7391, 4967, 9590, 7398, 5134, 3…	4583	1509	13285	1.54062	1.82463e-53	3.64926e-54	4.61785e-53
GOTERM_CC_DIRECT	GO:0005634~nucleus	1879	39.8009	8.48256e-51	3280, 3281, 29028, 25799, 22906, 22903, 2950, 25793, 1822, 25792, 22900, 6498, 6497, 6495, 6493, 5361, 23644, 6885, 25788, 23641, 3297, 5366, 79813, 84897, 546, 1810, 149603, 8243, 1434, 51497, 1431, 6895, 23633, 6894, 1843, 6888, 1841, 6470, 2971, 5347, 22926, 6472, 515, 1845, 138639, 79833, 128866, 22907, 100101467, 23623, 10075, 1831, 84874, 1832, 6899, 2962, 2960, 22916, 203068, 136647, 988, …	4343	4298	12453	1.25356	9.63619e-48	4.8181e-48	1.36199e-47
GOTERM_MF_DIRECT	GO:0005515~protein binding	2865	60.6863	4.08781e-36	80742, 3280, 23654, 79807, 63922, 3281, 6874, 5373, 10992, 23650, 949, 79803, 10994, 22905, 22906, 6491, 2950, 535, 63916, 25793, 1822, 25792, 22900, 2957, 2956, 6498, 84079, 2958, 6497, 6495, 6093, 23647, 6091, 23645, 6883, 63933, 6885, 23644, 79817, 23641, 25788, 29035, 3297, 23640, 5366, 79813, 6879, 2, 10092, 29903, 84897, 546, 1810, 10094, 219899, 149603, 23636, 8243, 23637, 1434, 51497, 572…	4211	7180	11857	1.12354	8.71522e-33	4.35761e-33	7.08071e-33
UP_KEYWORDS	RNA-binding	326	6.90532	6.23485e-30	253943, 51574, 79707, 8886, 6205, 144983, 10898, 23277, 55544, 1974, 1975, 84678, 11325, 8871, 6780, 56339, 7884, 11338, 1981, 7073, 84991, 1984, 6222, 92609, 6607, 440275, 9987, 92345, 22794, 8761, 16, 54888, 6895, 6894, 51691, 23013, 2971, 9879, 1994, 23016, 23112, 8446, 23524, 9991, 328, 10212, 22907, 51388, 10492, 6203, 23283, 54487, 22916, 10594, 85451, 56902, 9188, 988, 55133, 55132, 8638, …	4583	568	13285	1.66372	3.62245e-27	6.03741e-28	9.16784e-27
GOTERM_CC_DIRECT	GO:0005730~nucleolus	417	8.83287	5.70458e-29	79707, 8886, 10609, 146956, 22803, 79080, 6495, 55226, 26009, 23641, 29903, 7343, 6875, 55920, 84295, 5250, 205564, 55922, 5347, 6749, 10733, 90933, 10735, 10885, 328, 23521, 55201, 51388, 80854, 55105, 51187, 88745, 55388, 64793, 3110, 988, 6598, 6597, 10857, 339230, 8638, 8467, 7259, 55339, 55272, 84172, 708, 55127, 64434, 5927, 5929, 96764, 10969, 10664, 56892, 162989, 2885, 8453, 9585, 25885,…	4343	774	12453	1.54482	6.4804e-26	2.16013e-26	9.1595e-26
UP_KEYWORDS	Ribonucleoprotein	177	3.74921	5.40664e-28	9349, 2091, 9343, 6160, 6161, 26750, 6164, 6205, 144983, 6206, 6165, 6208, 51081, 6168, 6209, 6167, 9553, 6169, 124995, 220988, 3921, 128308, 64745, 678, 677, 55052, 6217, 6155, 6154, 63931, 6159, 6158, 6157, 5036, 6156, 7884, 64928, 6224, 6223, 6222, 84545, 9801, 6182, 6181, 78988, 10528, 51021, 26065, 92345, 9987, 54534, 6188, 51691, 6187, 27316, 55168, 25804, 10011, 10949, 29088, 63875, 10412,…	4583	261	13285	1.96582	3.14126e-25	4.48751e-26	7.95003e-25
GOTERM_MF_DIRECT	GO:0003723~RNA binding	268	5.67676	3.11771e-23	8880, 253943, 1477, 51574, 79707, 8886, 55744, 144983, 6208, 10898, 6209, 3726, 1975, 8871, 6217, 1982, 11338, 1981, 7073, 6224, 342371, 84991, 1984, 6222, 92609, 6607, 23536, 92345, 22794, 8761, 51691, 6894, 2971, 1994, 23016, 55660, 7184, 8446, 9991, 51388, 10492, 6897, 6201, 22916, 10594, 51282, 55133, 113000, 2107, 4076, 10657, 23034, 4154, 10658, 51132, 64434, 55795, 10236, 64062, 3614, 3615…	4211	464	11857	1.62632	6.64695e-20	2.21565e-20	5.40034e-20
GOTERM_CC_DIRECT	GO:0016020~membrane	838	17.7505	1.67547e-22	23659, 63922, 79803, 10994, 90231, 334, 79087, 3480, 3482, 63916, 84079, 55226, 23645, 118987, 8733, 23644, 8729, 10097, 738, 10094, 10724, 55215, 55920, 1434, 51497, 5355, 310, 57222, 23633, 10730, 22926, 8239, 51293, 8443, 515, 10735, 221927, 323, 10075, 84876, 85450, 51283, 988, 987, 3241, 10952, 983, 121457, 8460, 10061, 708, 576, 29956, 977, 10057, 5116, 976, 10961, 581, 10960, 27173, 308, 9…	4343	1869	12453	1.28564	1.90334e-19	4.75835e-20	2.69021e-19
UP_KEYWORDS	Methylation	419	8.87524	1.43437e-21	8880, 7205, 805, 801, 6874, 1314, 10992, 23518, 221937, 22905, 3482, 25793, 1822, 22803, 607, 2017, 6780, 50717, 8407, 26000, 26003, 546, 8724, 149603, 23787, 11083, 5250, 8030, 1431, 8761, 23524, 221, 284695, 5339, 10075, 1832, 85456, 610, 22916, 203068, 808, 85236, 10749, 136647, 6599, 26037, 5911, 57584, 5912, 10652, 9491, 55339, 8364, 26036, 8502, 84823, 8367, 10657, 26030, 57492, 57592, 8454…	4583	839	13285	1.44765	8.33368e-19	1.04171e-19	2.10912e-18
GOTERM_CC_DIRECT	GO:0005737~cytoplasm	1681	35.6069	2.63659e-20	3280, 79807, 63922, 5373, 6874, 949, 23650, 6491, 22906, 2950, 535, 63916, 25793, 1822, 22900, 2957, 2956, 6498, 6497, 84079, 6495, 6091, 23647, 5361, 23645, 23644, 6885, 25788, 3297, 5358, 10092, 29903, 10097, 6875, 10094, 219899, 149603, 8243, 23636, 1434, 22919, 25778, 6895, 57223, 23633, 1843, 6888, 84886, 6470, 5347, 8239, 6472, 1848, 1845, 79830, 1445, 23625, 138639, 79833, 128866, 22907, 9…	4343	4164	12453	1.15755	2.99517e-17	5.99034e-18	4.23342e-17
UP_KEYWORDS	mRNA processing	178	3.77039	1.57791e-19	7536, 1477, 10150, 9343, 10291, 140890, 25962, 144983, 10992, 10898, 6421, 55544, 27339, 220988, 22803, 10713, 23070, 201626, 9444, 677, 55421, 23451, 23450, 22985, 8683, 10907, 7884, 11338, 51163, 10914, 84991, 5936, 10147, 6607, 26986, 79760, 22794, 23398, 3312, 51691, 27316, 25804, 10946, 9775, 9879, 58517, 104, 9169, 103, 79622, 55660, 151987, 23524, 9991, 79833, 8563, 51585, 10212, 284695, 1…	4583	296	13285	1.74317	9.16767e-17	1.01863e-17	2.32019e-16
GOTERM_CC_DIRECT	GO:0005840~ribosome	106	2.24529	4.65444e-19	170958, 7536, 9349, 6160, 6161, 26750, 6164, 6205, 6165, 6208, 51081, 6168, 6209, 6167, 6169, 124995, 128308, 64745, 55052, 6217, 6155, 23, 6159, 63931, 6158, 6157, 6156, 64928, 6224, 6223, 6222, 84545, 4690, 9801, 6181, 51021, 54534, 55319, 821, 6188, 6187, 55168, 63875, 6171, 328, 23521, 8562, 10884, 51182, 51116, 6176, 6175, 6203, 51187, 6202, 6201, 54948, 219927, 23107, 84311, 285855, 11224, …	4343	149	12453	2.03988	5.28744e-16	8.8124e-17	7.47335e-16
UP_KEYWORDS	mRNA splicing	148	3.13493	1.05779e-18	7536, 10150, 9343, 10291, 140890, 25962, 144983, 10992, 6421, 55544, 27339, 220988, 10713, 9444, 23451, 23450, 22985, 8683, 10907, 11338, 84991, 5936, 10147, 6607, 26986, 79760, 22794, 23398, 3312, 51691, 27316, 25804, 10946, 9775, 9879, 58517, 9169, 55660, 79622, 151987, 23524, 9991, 79833, 8563, 10212, 284695, 10284, 10492, 8175, 10285, 10286, 23435, 22916, 55677, 10594, 55015, 7919, 9416, 8559…	4583	236	13285	1.81786	6.14576e-16	6.14576e-17	1.55539e-15
GOTERM_CC_DIRECT	GO:0005829~cytosol	1184	25.0794	3.686e-18	55236, 332, 5373, 3476, 330, 6491, 22903, 2950, 63916, 25793, 8737, 79084, 84079, 6093, 8021, 23647, 23645, 8027, 23644, 6885, 3297, 5366, 7337, 10092, 8729, 2, 7345, 10097, 738, 8724, 10094, 10724, 84890, 10728, 55920, 8243, 23637, 1434, 8439, 7327, 27183, 22919, 25778, 310, 6895, 23633, 6888, 1841, 22921, 6470, 5347, 8239, 1849, 1848, 10733, 1845, 10735, 1445, 55204, 79833, 329, 55201, 128866, …	4343	2844	12453	1.19373	4.18729e-15	5.98184e-16	5.91838e-15
GOTERM_BP_DIRECT	GO:0006413~translational initiation	91	1.92756	1.02875e-17	11224, 9349, 6122, 6160, 6124, 10209, 6125, 6161, 83939, 6164, 6205, 6206, 6165, 6208, 8672, 6168, 6209, 6167, 6169, 10480, 2197, 8668, 1974, 8669, 1975, 27335, 3921, 6217, 6155, 6154, 23, 23367, 6159, 3692, 6158, 6157, 7311, 6156, 1982, 123263, 1983, 1981, 25873, 6224, 6223, 6222, 6191, 3646, 6193, 6194, 26986, 6181, 6147, 6141, 6143, 4736, 9669, 6188, 6187, 9470, 8892, 8894, 6138, 6137, 6171, 6…	4171	123	11756	2.08524	7.03463e-14	7.03463e-14	2.02229e-14
GOTERM_BP_DIRECT	GO:0006364~rRNA processing	131	2.77484	1.43809e-17	26168, 9349, 2091, 6160, 79707, 6161, 6164, 6205, 6206, 6165, 6208, 6168, 6209, 6167, 54512, 6169, 54913, 22803, 23076, 79080, 3921, 84135, 84946, 6217, 6155, 6154, 51018, 6159, 22984, 6158, 5036, 6157, 6156, 6224, 6223, 6222, 55035, 54881, 65083, 6181, 1453, 10528, 92345, 1454, 10171, 57050, 404672, 9221, 23481, 6188, 6187, 23195, 5822, 9775, 23016, 57418, 55661, 8568, 54606, 6171, 6170, 10885, …	4171	201	11756	1.83694	9.83363e-14	4.91682e-14	2.82694e-14
GOTERM_BP_DIRECT	GO:0006614~SRP-dependent cotranslational protein targeting to membrane	69	1.46155	4.3565e-16	11224, 9349, 6122, 6160, 6726, 6124, 6727, 6125, 6728, 6161, 6729, 6164, 6205, 6206, 6165, 6208, 6168, 6209, 6167, 6169, 2197, 3921, 6731, 6730, 11231, 6217, 6155, 6154, 6159, 6158, 6157, 7311, 6156, 25873, 6224, 6223, 6222, 6191, 6193, 6194, 6181, 6147, 6141, 6143, 4736, 6188, 6187, 6747, 6138, 6137, 6171, 6135, 6170, 6132, 23521, 58477, 6130, 6230, 6176, 6233, 6175, 6229, 6203, 6228, 6202, 6227…	4171	87	11756	2.23537	3.03668e-12	1.01219e-12	8.77076e-13
UP_KEYWORDS	Ribosomal protein	107	2.26647	7.31199e-16	9349, 6160, 6161, 26750, 6164, 6205, 6206, 6165, 6208, 51081, 6168, 6209, 6167, 9553, 6169, 124995, 3921, 128308, 64745, 55052, 6217, 6155, 6154, 6159, 63931, 6158, 6157, 6156, 64928, 6224, 6223, 6222, 84545, 6182, 9801, 6181, 78988, 51021, 54534, 6188, 6187, 55168, 29088, 63875, 6171, 6170, 23521, 10884, 51116, 6176, 6175, 6203, 6202, 6201, 54948, 219927, 23107, 84311, 285855, 11224, 122704, 612…	4583	162	13285	1.91461	4.51528e-13	4.10783e-14	1.14353e-12
GOTERM_MF_DIRECT	GO:0098641~cadherin binding involved in cell-cell adhesion	166	3.5162	9.22468e-16	4301, 1192, 57175, 10890, 682, 23513, 800, 6164, 3875, 3337, 23650, 9748, 10298, 22905, 11329, 55379, 1627, 27131, 2011, 2017, 26156, 10163, 8407, 55854, 23647, 6159, 25978, 1982, 1983, 1981, 10006, 471, 2023, 11336, 1495, 9052, 5216, 4690, 1453, 10528, 829, 51100, 7414, 2316, 10226, 2317, 22919, 3312, 3895, 6187, 6282, 8301, 1500, 79026, 51510, 5962, 10801, 11135, 7112, 26130, 57142, 26058, 7529…	4211	281	11857	1.66338	1.8936e-12	4.73399e-13	1.54321e-12
GOTERM_BP_DIRECT	GO:0000398~mRNA splicing, via spliceosome	130	2.75365	6.19238e-15	55749, 7536, 5434, 1477, 5435, 9343, 5438, 10291, 59286, 10992, 125950, 27339, 220988, 27336, 10713, 5441, 23451, 56339, 23450, 10907, 8683, 11338, 51163, 10914, 26986, 79760, 51593, 22794, 23398, 3312, 51691, 27316, 23013, 25804, 9775, 10946, 9879, 10949, 1994, 55660, 79622, 23524, 79833, 51585, 10212, 10492, 8175, 2962, 10286, 22916, 5431, 10594, 5430, 5433, 5432, 7919, 9416, 57721, 988, 83443,…	4171	209	11756	1.75314	4.25135e-11	1.06284e-11	1.22236e-11
GOTERM_CC_DIRECT	GO:0005913~cell-cell adherens junction	174	3.68566	8.86801e-15	4301, 1192, 57175, 10890, 682, 23513, 800, 6164, 3875, 3337, 23650, 9748, 10298, 22905, 11329, 55379, 1627, 27131, 2011, 2017, 26156, 10163, 8407, 55854, 23647, 6159, 25978, 1982, 1983, 1981, 10006, 471, 2023, 11336, 1495, 9052, 5216, 4690, 1453, 10528, 829, 51100, 7414, 2316, 10226, 2317, 22919, 3312, 3895, 6187, 6282, 8301, 1500, 79026, 51510, 5962, 10801, 11135, 7112, 9231, 117178, 26130, 5714…	4343	308	12453	1.61988	1.00897e-11	1.26121e-12	1.42664e-11
GOTERM_CC_DIRECT	GO:0030529~intracellular ribonucleoprotein complex	87	1.84283	8.87507e-15	11052, 51574, 9343, 6124, 1938, 6125, 55132, 144983, 494115, 124995, 220988, 3191, 3192, 81, 3190, 10658, 23020, 678, 1859, 677, 6738, 23210, 672, 10236, 6737, 6155, 1660, 5036, 64975, 7884, 3189, 3182, 3183, 8826, 3184, 1655, 3185, 81892, 10146, 6191, 3181, 4691, 10432, 6741, 6193, 2058, 6194, 26986, 23636, 3609, 9908, 1452, 3608, 7514, 9987, 1454, 22794, 2932, 8761, 3312, 11100, 6188, 27316, 97…	4343	125	12453	1.99569	1.00897e-11	1.1211e-12	1.42664e-11
UP_KEYWORDS	Cytoplasm	1531	32.4296	1.46072e-14	79807, 332, 5373, 3476, 330, 55239, 79803, 23650, 22905, 22906, 6491, 22903, 2950, 63916, 1822, 25793, 8737, 79084, 22900, 85464, 6495, 6093, 8409, 204851, 8027, 23644, 6885, 3297, 7337, 5358, 10092, 8729, 7345, 10097, 8725, 6875, 10094, 219899, 10725, 10724, 149603, 10728, 55920, 23636, 23637, 1434, 8030, 314, 163782, 8036, 22919, 8761, 51499, 25778, 6895, 163786, 57223, 6888, 84886, 7332, 6470,…	4583	3882	13285	1.14322	8.51452e-12	7.09544e-13	2.15494e-11
GOTERM_BP_DIRECT	GO:0000184~nuclear-transcribed mRNA catabolic process, nonsense-mediated decay	80	1.69456	1.60796e-14	11224, 9349, 6122, 6160, 6124, 6125, 6161, 6164, 6205, 6206, 84305, 6165, 6208, 6168, 6209, 55181, 6167, 6169, 2197, 3921, 2107, 6217, 6155, 6154, 6159, 6158, 6157, 7311, 6156, 1981, 25873, 6224, 6223, 6222, 5976, 6191, 3646, 6193, 6194, 26986, 6181, 6147, 6141, 6143, 26019, 2935, 22794, 4736, 5520, 6188, 6187, 23293, 9775, 5515, 5518, 55629, 6138, 9939, 6137, 6171, 6135, 6170, 6132, 23521, 6130,…	4171	111	11756	2.03136	1.1008e-10	2.20159e-11	3.16414e-11
UP_KEYWORDS	Cell cycle	293	6.20631	2.89734e-14	55749, 8881, 63922, 332, 55844, 8318, 10899, 55544, 10615, 29128, 10713, 8872, 23503, 83903, 54892, 55752, 55958, 114799, 7175, 84897, 56647, 402, 23126, 440275, 11334, 55215, 8243, 55920, 23637, 1459, 1452, 23397, 205564, 27183, 22919, 54888, 163786, 1843, 348235, 25909, 1069, 5347, 8239, 55665, 55660, 10735, 9994, 90120, 79441, 3833, 3832, 2305, 1063, 257364, 1062, 9181, 91272, 9184, 150094, 55…	4583	593	13285	1.43227	1.68355e-11	1.29508e-12	4.26104e-11
GOTERM_BP_DIRECT	GO:0098609~cell-cell adhesion	155	3.2832	4.15635e-14	4301, 57175, 10890, 682, 800, 6164, 3875, 3337, 23650, 83604, 9748, 10298, 22905, 11329, 55379, 1627, 63916, 27131, 2011, 2017, 26156, 10163, 55854, 8407, 23647, 6159, 25978, 1982, 1983, 1981, 10006, 471, 2023, 11336, 9052, 5216, 1453, 10528, 829, 51100, 10226, 2317, 22919, 3312, 3895, 6282, 6187, 8301, 79026, 51510, 5962, 10801, 11135, 7112, 26130, 57142, 26058, 7529, 226, 54874, 51031, 26135, 1…	4171	266	11756	1.64236	2.8393e-10	4.73216e-11	8.16236e-11
GOTERM_BP_DIRECT	GO:0006397~mRNA processing	98	2.07583	2.47015e-13	10150, 9343, 140890, 10291, 25962, 144983, 10992, 6421, 55544, 79882, 22803, 10713, 201626, 9444, 54998, 677, 54890, 56339, 23450, 22984, 8683, 22985, 11338, 57661, 5936, 10147, 5930, 6607, 22794, 10946, 10949, 58517, 104, 103, 9169, 151987, 9991, 284695, 10284, 8175, 283989, 10285, 10286, 23435, 55677, 10594, 8559, 11052, 9967, 8570, 255967, 6830, 1665, 494115, 84967, 55339, 51329, 3191, 29890, …	4171	150	11756	1.84143	1.68915e-09	2.41308e-10	4.85589e-10
GOTERM_BP_DIRECT	GO:0019083~viral transcription	75	1.58865	2.47732e-13	11224, 9349, 6122, 23511, 6160, 6124, 6125, 6161, 6164, 6205, 6206, 6165, 6208, 6168, 6209, 23279, 6167, 6169, 4927, 2197, 11097, 9972, 3921, 8021, 23225, 6217, 6155, 9818, 6154, 6159, 6158, 23165, 6157, 7311, 6156, 25873, 7175, 6224, 6223, 6222, 6191, 6193, 10762, 6194, 55706, 23636, 6181, 6147, 6141, 6143, 4736, 6188, 6187, 348995, 6138, 6137, 6171, 6135, 6170, 6132, 23521, 6130, 6230, 8086, 61…	4171	105	11756	2.01322	1.69371e-09	2.11714e-10	4.86899e-10
KEGG_PATHWAY	hsa03010:Ribosome	85	1.80047	5.56547e-13	11224, 9349, 6122, 6160, 6124, 6125, 6161, 6164, 6205, 6206, 6165, 6208, 51081, 6168, 6209, 6167, 9553, 6169, 2197, 124995, 3921, 64983, 64981, 55052, 6217, 6155, 6154, 63931, 6159, 6158, 6157, 7311, 6156, 54460, 51264, 64928, 64979, 65005, 25873, 6224, 6223, 6222, 29074, 6191, 200916, 6193, 6194, 9801, 6182, 6181, 6147, 6141, 51021, 6143, 4736, 6188, 6187, 55168, 64960, 29088, 6138, 63875, 6137,…	1804	121	4809	1.87263	1.61401e-10	1.61401e-10	7.39875e-10
INTERPRO	IPR000504:RNA recognition motif domain	110	2.33001	5.83029e-13	51574, 140890, 155435, 144983, 27332, 6421, 125950, 55544, 1975, 220988, 27336, 10137, 8871, 23067, 9739, 8683, 11338, 7073, 92400, 389677, 84991, 5939, 55035, 5936, 10146, 5935, 4691, 26986, 9908, 9987, 8761, 27316, 23013, 10949, 57690, 1994, 58517, 10180, 9991, 8662, 10492, 8666, 23283, 23435, 22916, 23082, 11052, 494115, 3191, 1153, 80004, 29890, 29896, 10658, 27037, 26528, 4841, 10236, 64783,…	4344	179	12512	1.77001	2.71901e-09	2.71901e-09	1.10132e-09
UP_KEYWORDS	Repressor	258	5.46494	6.49493e-13	55749, 170959, 4204, 2005, 7753, 3720, 3280, 332, 8125, 221937, 23272, 22904, 10488, 10614, 29128, 84678, 6495, 171023, 51564, 1487, 8409, 10336, 23269, 57215, 166, 25788, 1982, 9869, 10472, 7071, 11338, 8725, 342371, 1810, 4221, 2023, 11331, 11335, 5252, 54880, 7227, 51497, 9987, 55729, 51193, 27086, 5611, 55922, 359948, 23013, 23019, 253461, 23119, 3399, 4783, 1999, 4094, 9994, 8427, 23522, 999…	4583	520	13285	1.43823	3.77348e-10	2.69534e-11	9.55014e-10
GOTERM_CC_DIRECT	GO:0016607~nuclear speck	113	2.39356	6.8168e-13	1198, 9343, 8535, 25962, 27332, 10409, 27339, 51631, 64318, 79882, 57178, 11325, 54815, 204851, 54890, 8405, 23067, 3091, 23451, 56339, 9739, 22985, 8394, 64326, 11338, 6015, 92609, 5936, 8554, 1452, 22794, 9360, 9774, 9775, 10946, 9879, 23091, 58517, 55660, 8446, 23524, 328, 10284, 55105, 10210, 8175, 10285, 55534, 23435, 10594, 7919, 83932, 8559, 114034, 9967, 988, 56252, 57634, 55904, 6729, 56…	4343	185	12453	1.75142	7.74385e-10	7.74385e-11	1.09452e-09
SMART	SM00360:RRM	105	2.22411	1.24342e-12	51574, 140890, 155435, 144983, 27332, 6421, 125950, 55544, 1975, 220988, 27336, 10137, 23067, 9739, 8683, 11338, 7073, 92400, 389677, 5939, 55035, 5936, 10146, 5935, 4691, 26986, 9908, 9987, 8761, 27316, 23013, 10949, 1994, 58517, 10180, 9991, 8662, 10492, 8666, 23283, 23435, 22916, 23082, 11052, 494115, 3191, 1153, 80004, 29890, 29896, 10658, 26528, 4841, 64783, 10236, 64062, 9295, 7307, 3187, 3…	2429	169	6919	1.76978	8.9031e-10	8.9031e-10	1.88087e-09
GOTERM_MF_DIRECT	GO:0003735~structural constituent of ribosome	116	2.45711	1.34592e-12	170958, 9349, 6160, 6161, 55186, 6164, 6205, 55744, 6206, 6165, 51629, 6208, 51081, 6168, 6209, 6167, 9553, 6169, 124995, 3921, 128308, 60386, 55052, 6217, 6155, 6154, 6159, 63931, 6158, 6157, 6156, 64928, 6224, 6223, 6222, 84545, 10165, 9801, 6182, 6181, 78988, 5250, 81034, 51021, 6188, 6187, 55168, 29088, 63875, 1468, 6171, 6170, 23521, 10884, 51116, 6176, 292, 6175, 6203, 51187, 6202, 51312, 6…	4211	190	11857	1.71907	2.86951e-09	5.73902e-10	2.33135e-09
INTERPRO	IPR012677:Nucleotide-binding, alpha-beta plait	123	2.60538	2.63834e-12	51574, 140890, 155435, 144983, 27332, 6421, 125950, 113251, 55544, 1975, 220988, 27336, 10137, 8871, 23067, 55421, 9739, 22985, 8683, 11338, 7073, 92400, 389677, 84991, 27327, 5939, 55035, 5936, 10146, 5935, 4691, 26986, 51593, 9908, 9987, 8761, 27316, 23013, 10949, 57690, 1994, 58517, 29777, 23112, 23592, 10180, 9991, 8662, 10492, 8666, 23283, 23435, 22916, 23082, 9188, 27291, 11052, 494115, 319…	4344	210	12512	1.68703	1.23052e-08	6.15259e-09	4.98414e-09
UP_SEQ_FEATURE	cross-link:Glycyl lysine isopeptide (Lys-Gly) (interchain with G-Cter in ubiquitin)	111	2.3512	2.68833e-12	55749, 805, 3146, 801, 3006, 9928, 37, 488, 7168, 1729, 8668, 4820, 92815, 6418, 29128, 126961, 3097, 3091, 23, 6159, 4297, 8394, 22985, 9869, 5358, 6224, 4830, 402, 5216, 5931, 55215, 84126, 6185, 27089, 6188, 3895, 513, 7922, 259282, 58517, 6748, 2177, 23111, 9994, 3837, 84726, 55870, 7316, 10492, 2778, 3014, 1062, 3015, 3017, 4170, 6897, 55388, 9184, 203068, 808, 85236, 8969, 7844, 5478, 983, …	4552	185	13191	1.73871	2.36812e-08	2.36812e-08	5.42089e-09
GOTERM_BP_DIRECT	GO:0006412~translation	129	2.73247	3.68706e-12	170958, 9349, 9343, 6160, 6161, 55186, 6164, 6205, 55744, 6206, 6165, 51629, 6208, 51081, 6168, 6209, 6167, 6169, 124995, 1979, 3921, 128308, 60386, 64745, 26156, 55052, 6217, 6155, 23, 6154, 63931, 6159, 207, 6158, 6157, 6156, 64928, 1981, 6224, 6223, 6222, 84545, 10165, 9801, 6181, 78988, 5250, 81034, 6301, 51021, 8761, 6188, 6187, 55168, 29088, 63875, 1468, 6171, 6170, 23521, 10884, 51116, 103…	4171	220	11756	1.65267	2.52121e-08	2.80134e-09	7.24787e-09
UP_KEYWORDS	Transcription	806	17.0727	7.48918e-12	3280, 332, 6874, 29028, 25799, 221937, 22904, 1822, 2957, 2958, 6495, 6493, 8409, 204851, 6883, 8028, 6885, 25788, 3297, 6879, 7342, 6875, 8725, 7343, 546, 1810, 10725, 84295, 51497, 8031, 55922, 2976, 7332, 2971, 22926, 8427, 328, 101060200, 329, 284695, 100101467, 84874, 85457, 6899, 2962, 2960, 2968, 2967, 7597, 988, 55900, 571, 7593, 146198, 55904, 7592, 10957, 55279, 7391, 8462, 5326, 3237, …	4583	1949	13285	1.19877	4.35124e-09	2.90083e-10	1.10123e-08
UP_KEYWORDS	Chromosome	163	3.45266	1.20422e-11	3148, 3149, 8886, 3146, 92822, 3005, 332, 9555, 3006, 55183, 10609, 54908, 10919, 3008, 387103, 23468, 23272, 4926, 92815, 10615, 2956, 79003, 126961, 29781, 283489, 83903, 672, 23067, 9739, 79813, 79980, 9869, 1616, 114799, 23476, 10721, 7175, 546, 23063, 23064, 64324, 5930, 23126, 201254, 5932, 55920, 8243, 65083, 11130, 84295, 170506, 1452, 23397, 113130, 51203, 23481, 23293, 348235, 25909, 55…	4583	305	13285	1.54917	6.99649e-09	4.3728e-10	1.7707e-08
GOTERM_BP_DIRECT	GO:0008380~RNA splicing	93	1.96992	1.59446e-11	9967, 10150, 9343, 8570, 140890, 25962, 144983, 27332, 10992, 6421, 55544, 6830, 1665, 51729, 494115, 84967, 51329, 29890, 10713, 708, 4154, 9444, 6732, 6733, 4841, 23210, 23450, 22985, 9295, 8458, 7307, 9589, 84950, 3189, 9584, 3183, 58506, 84687, 5936, 10147, 1659, 85437, 6651, 6637, 6636, 6633, 6634, 51755, 27257, 130916, 9360, 5511, 25804, 9775, 10946, 5515, 5518, 9129, 9128, 10262, 58517, 91…	4171	147	11756	1.78314	1.09029e-07	1.09029e-08	3.13433e-08
UP_KEYWORDS	Transcription regulation	780	16.5219	2.68967e-11	3280, 332, 6874, 29028, 25799, 221937, 22904, 1822, 2957, 2958, 6495, 6493, 8409, 204851, 6883, 8028, 6885, 25788, 3297, 6879, 7342, 6875, 8725, 7343, 546, 1810, 10725, 84295, 51497, 8031, 55922, 7332, 2971, 22926, 8427, 101060200, 328, 329, 284695, 100101467, 84874, 85457, 6899, 2962, 2960, 2968, 2967, 7597, 988, 55900, 7593, 571, 146198, 55904, 7592, 10957, 55279, 7391, 8462, 5326, 3237, 5325, …	4583	1889	13285	1.19695	1.5627e-08	9.19234e-10	3.95494e-08
UP_KEYWORDS	Spliceosome	78	1.65219	5.03277e-11	7536, 988, 9343, 83443, 10291, 140890, 144983, 26121, 10992, 27339, 220988, 3192, 56259, 3190, 10713, 23020, 5411, 10236, 23451, 23450, 10907, 55596, 8458, 7307, 3187, 84950, 11338, 3183, 84991, 3185, 1655, 1659, 3181, 85437, 9785, 26986, 57461, 6637, 6636, 6633, 23398, 6634, 57703, 3312, 9092, 25949, 51691, 5511, 27316, 25804, 9775, 10946, 9129, 9128, 27258, 10262, 10569, 79622, 23524, 6626, 993…	4583	121	13285	1.86862	2.92404e-08	1.62446e-09	7.40027e-08
KEGG_PATHWAY	hsa03040:Spliceosome	83	1.7581	5.64171e-11	988, 9343, 83443, 10291, 144983, 26121, 10992, 27339, 1665, 51729, 494115, 220988, 56259, 3192, 3190, 10713, 29896, 11325, 3305, 23020, 3304, 23451, 23450, 10907, 22985, 8683, 10915, 7307, 84950, 11338, 3183, 84991, 1655, 1659, 9785, 57461, 6637, 6636, 6633, 6634, 3312, 9092, 25949, 10523, 51691, 27316, 25804, 23350, 9775, 10946, 9879, 9129, 9128, 27258, 10262, 58517, 10569, 55660, 6626, 9939, 64…	1804	124	4809	1.78433	1.6361e-08	8.18048e-09	7.50004e-08
GOTERM_CC_DIRECT	GO:0005925~focal adhesion	189	4.00339	1.24626e-10	7205, 9349, 6160, 57175, 9240, 10890, 682, 8675, 6205, 6208, 6168, 6209, 55740, 6169, 10298, 3675, 3482, 10487, 8021, 2017, 8874, 6217, 6155, 8936, 5034, 3716, 3693, 8394, 6156, 10092, 64326, 10097, 6223, 6222, 10094, 10146, 2022, 58497, 1495, 26986, 5216, 10525, 824, 6181, 823, 214, 2316, 3313, 7414, 2768, 2317, 10672, 2314, 1785, 3312, 3897, 23011, 2783, 6188, 6187, 1072, 10015, 23396, 79026, 5…	4343	370	12453	1.46469	1.41575e-07	1.28704e-08	2.00104e-07
UP_KEYWORDS	Coiled coil	931	19.7204	1.4086e-10	54107, 332, 29028, 10992, 23650, 334, 26608, 22906, 535, 1822, 25792, 22900, 6498, 6497, 79080, 84074, 8021, 6093, 5361, 118987, 8028, 63933, 23644, 6879, 29903, 10721, 6875, 738, 8725, 84897, 79095, 1810, 546, 219899, 8243, 23636, 23637, 8030, 163782, 25778, 51499, 163786, 22926, 515, 10735, 64599, 329, 128866, 284695, 324, 55206, 55209, 85458, 10075, 5339, 1831, 85459, 1832, 85457, 85450, 20306…	4583	2311	13285	1.16778	8.18395e-08	4.30734e-09	2.07123e-07
GOTERM_BP_DIRECT	GO:0016032~viral process	151	3.19847	2.07881e-10	5434, 23511, 23513, 3875, 6874, 29855, 1104, 10992, 8672, 23279, 2648, 4927, 10616, 23468, 1974, 1387, 10488, 6418, 11097, 2956, 79080, 2958, 4217, 8021, 10163, 118987, 4193, 1385, 3856, 7337, 1616, 8729, 23264, 1981, 23476, 7175, 10006, 23063, 23636, 10524, 10527, 7514, 55729, 8945, 7416, 3843, 3312, 3842, 8655, 23013, 54476, 5422, 10111, 819, 1642, 26057, 7529, 699, 90120, 10313, 3735, 10492, 5…	4171	279	11756	1.52543	1.42149e-06	1.29226e-07	4.08644e-07
UP_KEYWORDS	Helicase	80	1.69456	2.54111e-10	6595, 57634, 6597, 8886, 1108, 10856, 1106, 1107, 113510, 9557, 1105, 641, 8467, 1662, 1663, 1665, 1974, 9931, 23405, 64848, 89797, 11325, 23020, 90957, 55794, 84181, 9400, 1660, 25788, 9401, 9704, 8458, 1656, 1654, 546, 57062, 1655, 5976, 375748, 10146, 23064, 1659, 9785, 79665, 55760, 56652, 10973, 170506, 10521, 57696, 80119, 57697, 9775, 9879, 7520, 55661, 4173, 54606, 4172, 4175, 4174, 4176,…	4583	128	13285	1.81172	1.47639e-07	7.38194e-09	3.7365e-07
KEGG_PATHWAY	hsa04141:Protein processing in endoplasmic reticulum	97	2.05465	3.22058e-10	7494, 10130, 22872, 3337, 10294, 51009, 10299, 1388, 10134, 4217, 10808, 23645, 5034, 23640, 440275, 29978, 824, 10525, 6184, 823, 3998, 7327, 10273, 80267, 6400, 7415, 7326, 3312, 5611, 56886, 821, 6185, 10427, 7186, 3320, 10277, 23193, 1649, 22926, 9632, 6748, 55666, 6747, 10113, 4780, 6746, 201595, 6745, 7184, 10802, 811, 3326, 9373, 7321, 7324, 27102, 7322, 7323, 9601, 11253, 10952, 10956, 58…	1804	155	4809	1.66824	9.33969e-08	3.11323e-08	4.28142e-07
GOTERM_MF_DIRECT	GO:0003682~chromatin binding	178	3.77039	3.30332e-10	3725, 170959, 4204, 2005, 4205, 3720, 84733, 8535, 29028, 1104, 8318, 6421, 2648, 23468, 23309, 339287, 64318, 1387, 10488, 2956, 6498, 6497, 10155, 6495, 51564, 54623, 26155, 8409, 4297, 55193, 9869, 23476, 10721, 25836, 7175, 7343, 8725, 546, 6015, 4221, 6601, 64324, 23314, 9156, 54881, 23636, 8243, 5252, 64710, 7227, 4774, 8861, 113130, 27086, 1786, 57697, 27316, 3516, 9219, 9025, 5422, 1460, …	4211	342	11857	1.46549	7.04267e-07	1.17378e-07	5.72184e-07
GOTERM_MF_DIRECT	GO:0003677~DNA binding	573	12.1373	3.77577e-10	7494, 2005, 3280, 63922, 54107, 6874, 334, 25799, 197407, 146956, 2957, 85464, 6495, 6493, 602, 204851, 26009, 6883, 8028, 57215, 25788, 3297, 10721, 7342, 6875, 1810, 546, 2023, 6778, 55215, 23637, 84295, 58487, 348654, 55922, 2976, 2971, 6749, 58486, 10736, 811, 79830, 23522, 8427, 328, 101060200, 55201, 284695, 51385, 339324, 10075, 339318, 84874, 6899, 2962, 388569, 51282, 85236, 7597, 3110, …	4211	1322	11857	1.22043	8.04994e-07	1.14999e-07	6.5402e-07
UP_KEYWORDS	Chromatin regulator	142	3.00784	1.64051e-09	7290, 200424, 3720, 84733, 8535, 1108, 1106, 9555, 1107, 29855, 1105, 10919, 10927, 339287, 23466, 84678, 29128, 51773, 10155, 171023, 11091, 51564, 83903, 23067, 9739, 51230, 4297, 55193, 7403, 79813, 9869, 1616, 23476, 546, 6015, 4221, 5934, 54799, 6601, 8295, 64324, 23314, 9643, 11335, 5931, 5252, 10524, 55723, 54880, 81611, 114803, 57050, 22992, 1786, 9025, 23326, 26147, 196528, 9810, 23522, …	4583	271	13285	1.51891	9.53134e-07	4.53874e-08	2.41223e-06
UP_KEYWORDS	Ubl conjugation pathway	268	5.67676	1.89347e-09	8881, 10206, 140459, 55236, 330, 51377, 10616, 59343, 25793, 6612, 29128, 84678, 6613, 55230, 171023, 50717, 8405, 81847, 55958, 140461, 7337, 80829, 26001, 9867, 7345, 55658, 56929, 149603, 84085, 7327, 205564, 7326, 81559, 7189, 7187, 7186, 7332, 23295, 54476, 84196, 7336, 8239, 221687, 55527, 55666, 8445, 90933, 329, 54876, 7317, 51588, 10210, 80204, 90268, 7319, 10075, 7320, 7321, 7324, 7322,…	4583	578	13285	1.34406	1.1001e-06	5.00048e-08	2.78419e-06
GOTERM_MF_DIRECT	GO:0000166~nucleotide binding	149	3.15611	5.14212e-09	22978, 51574, 140890, 7298, 155435, 27332, 144983, 9557, 6421, 125950, 113251, 55544, 1975, 27336, 220988, 10137, 8871, 3094, 23067, 55421, 476, 9739, 22985, 8683, 84681, 11338, 3491, 92400, 7073, 84991, 389677, 27327, 5939, 55035, 5936, 10146, 5935, 4691, 115024, 26986, 51593, 9908, 9987, 8761, 7417, 7419, 27316, 23013, 3320, 109, 1994, 10949, 57690, 5422, 58517, 29777, 23112, 23592, 10180, 9991…	4211	284	11857	1.47726	1.09629e-05	1.37037e-06	8.90692e-06
UP_KEYWORDS	Ribosome biogenesis	46	0.97437	1.11854e-08	117246, 54552, 387338, 26164, 10528, 92345, 10171, 11103, 29102, 26284, 115939, 23481, 92856, 54433, 9790, 55272, 55505, 51154, 708, 55661, 54606, 10412, 29889, 55127, 55794, 23212, 22907, 55299, 22868, 51388, 1736, 3692, 51119, 10969, 8602, 23560, 51187, 81875, 10436, 88745, 51602, 80135, 25879, 9724, 1654, 79631	4583	65	13285	2.05143	6.49871e-06	2.82553e-07	1.64473e-05
UP_KEYWORDS	Host-virus interaction	174	3.68566	1.17076e-08	5434, 23513, 3875, 6874, 29855, 10992, 8672, 949, 10898, 2648, 10616, 23468, 1974, 1387, 10488, 6418, 2956, 79080, 3921, 2958, 4217, 1487, 10163, 118987, 4193, 1385, 3693, 3856, 7337, 1616, 8729, 23264, 1981, 23476, 10006, 3916, 23063, 440275, 23636, 10524, 10527, 7514, 55729, 8945, 7416, 3843, 3312, 10670, 3842, 8655, 3949, 10015, 23013, 54476, 5422, 10111, 819, 1642, 26057, 7529, 3837, 699, 383…	4583	354	13285	1.42481	6.80212e-06	2.83423e-07	1.72151e-05
GOTERM_MF_DIRECT	GO:0031625~ubiquitin protein ligase binding	137	2.90193	1.58509e-08	7494, 64112, 1191, 9927, 23710, 22903, 8322, 10613, 7167, 25793, 1629, 8737, 63893, 6497, 9040, 6613, 10155, 25820, 57761, 672, 8405, 3091, 4193, 22888, 3716, 5036, 409, 1616, 54926, 7345, 8312, 875, 8554, 5144, 22794, 10273, 7414, 3313, 7327, 7415, 7326, 6950, 3312, 10670, 10221, 7189, 7188, 7187, 23197, 7186, 54472, 7332, 10010, 9025, 7336, 22926, 11345, 4090, 29089, 7520, 55666, 23111, 4091, 9…	4211	260	11857	1.48367	3.37936e-05	3.7549e-06	2.74562e-05
GOTERM_BP_DIRECT	GO:0043161~proteasome-mediated ubiquitin-dependent protein catabolic process	105	2.22411	1.72066e-08	8881, 10206, 23510, 9861, 9928, 10616, 22903, 10296, 8405, 54620, 409, 54926, 55658, 7345, 8312, 51434, 51433, 149603, 10524, 57154, 1452, 10273, 80267, 7415, 8945, 10277, 1649, 54476, 51512, 139285, 4780, 1642, 57542, 329, 324, 7316, 9373, 55175, 10210, 7319, 7320, 996, 7321, 997, 7324, 7323, 9184, 51283, 64795, 55709, 53339, 7126, 22933, 5686, 5685, 5683, 983, 9491, 10197, 5887, 5886, 51529, 51…	4171	188	11756	1.57417	0.000117652	9.80483e-06	3.3824e-05
UP_SEQ_FEATURE	mutagenesis site	715	15.1451	1.73194e-08	7205, 23513, 55236, 23654, 332, 3281, 29028, 51377, 10616, 3480, 10618, 22901, 8737, 10614, 22900, 2957, 29128, 2011, 85464, 2956, 11091, 6493, 6093, 50717, 8409, 23645, 6885, 207, 208, 3297, 5366, 409, 6879, 26001, 163, 26003, 7345, 2023, 6778, 402, 58497, 7204, 80727, 8243, 58487, 7227, 8031, 8861, 205564, 27183, 22919, 25778, 5351, 22926, 5347, 6749, 58480, 10733, 8446, 90933, 1445, 8851, 328,…	4552	1768	13191	1.17192	0.000152555	7.62803e-05	3.49241e-05
UP_KEYWORDS	Cell division	174	3.68566	1.95392e-08	8881, 84930, 332, 55844, 115098, 1104, 22974, 54908, 10899, 83879, 387103, 10296, 4926, 10615, 10713, 79003, 1894, 8872, 10807, 23503, 54892, 11140, 55752, 55958, 10907, 79980, 7175, 51434, 51433, 23063, 23126, 9055, 201254, 5932, 55038, 55920, 8243, 11130, 81610, 1452, 23397, 113130, 51203, 205564, 5048, 27183, 22919, 54888, 84612, 6188, 9903, 348235, 10015, 2771, 25909, 55165, 9025, 1069, 83461…	4583	356	13285	1.41681	1.13522e-05	4.54091e-07	2.87308e-05
GOTERM_CC_DIRECT	GO:0005739~mitochondrion	494	10.4639	2.68963e-08	23659, 84273, 1312, 10899, 22906, 2950, 25793, 1727, 8737, 2011, 157378, 23645, 27079, 1327, 63931, 207, 5366, 123263, 8729, 751071, 8725, 85476, 84890, 8209, 23787, 23786, 5250, 823, 215, 23530, 1431, 57226, 219, 51499, 27089, 513, 10730, 1841, 22921, 6470, 84196, 51295, 6472, 8443, 515, 401505, 328, 5245, 10884, 7317, 22907, 55101, 94081, 522, 10743, 521, 6389, 523, 617, 5917, 55471, 192111, 98…	4343	1168	12453	1.21274	3.05538e-05	2.54618e-06	4.31858e-05
GOTERM_CC_DIRECT	GO:0005681~spliceosomal complex	56	1.18619	3.36882e-08	7536, 9343, 140890, 10291, 144983, 10992, 51729, 56259, 10713, 23020, 10236, 23451, 23450, 5546, 10907, 8458, 7307, 11338, 3189, 3183, 84991, 8539, 3181, 1659, 55760, 6637, 6636, 9987, 6633, 6634, 57703, 3312, 51691, 5511, 25804, 10946, 9129, 9128, 58517, 10262, 10569, 6626, 4670, 6628, 6629, 22828, 6625, 10212, 284695, 8175, 10285, 10286, 10594, 7919, 6427, 8559	4343	86	12453	1.86713	3.82691e-05	2.94383e-06	5.40912e-05
UP_KEYWORDS	DNA damage	164	3.47384	3.48433e-08	22976, 3146, 9557, 55183, 51377, 5536, 6421, 8930, 27339, 146956, 29128, 2956, 675, 23503, 79791, 55031, 672, 25, 25788, 51567, 79915, 11284, 23476, 10721, 56647, 546, 472, 58493, 84939, 23064, 5930, 9643, 201254, 5932, 9156, 8243, 55215, 5252, 7515, 7516, 10273, 84126, 2072, 348654, 7415, 9907, 404672, 6188, 57697, 7189, 10010, 1647, 9025, 1069, 259282, 2175, 6749, 7520, 1643, 29089, 10111, 8369…	4583	334	13285	1.42334	2.02437e-05	7.78613e-07	5.12342e-05
INTERPRO	IPR014001:Helicase, superfamily 1/2, ATP-binding domain	63	1.33446	3.69918e-08	6595, 57634, 6597, 8886, 1108, 1106, 1107, 113510, 1105, 9557, 641, 8467, 1662, 1665, 1974, 23405, 64848, 11325, 23020, 90957, 55794, 84181, 9400, 1660, 25788, 9401, 9704, 8458, 10721, 1656, 1654, 546, 57062, 1655, 375748, 1659, 9785, 79665, 55760, 10973, 170506, 10521, 57696, 57697, 9775, 9879, 55661, 54606, 11269, 10847, 55308, 10212, 22907, 11218, 80205, 57680, 83479, 9188, 79039, 83990, 7919,…	4344	101	12512	1.79662	0.000172515	5.75082e-05	6.98819e-05
UP_KEYWORDS	DNA-binding	638	13.5141	4.25406e-08	8880, 7494, 2005, 3280, 63922, 54107, 334, 25799, 221937, 197407, 29128, 2956, 22803, 6495, 6493, 204851, 26009, 8028, 57215, 25788, 3297, 7342, 6875, 7343, 1810, 546, 10725, 2020, 2023, 6778, 55215, 84295, 7227, 51193, 27086, 55922, 2971, 22926, 6749, 10736, 8427, 101060200, 328, 55201, 284695, 51385, 100101467, 23528, 339324, 10075, 55388, 339318, 84874, 6899, 2962, 388569, 85236, 6595, 7597, 3…	4583	1568	13285	1.17947	2.47158e-05	9.15411e-07	6.25525e-05
UP_KEYWORDS	Chaperone	94	1.9911	4.46395e-08	26517, 689, 10130, 1191, 3476, 3337, 51371, 9829, 1861, 10695, 2288, 10294, 3336, 10541, 6830, 6418, 10131, 3304, 8409, 3301, 11231, 90624, 11140, 80273, 5034, 22948, 10575, 1616, 10576, 7411, 10574, 26353, 29074, 6449, 26520, 7203, 871, 11080, 10728, 5931, 29071, 10525, 55723, 9530, 9531, 81611, 4189, 6341, 3313, 5082, 6950, 3312, 5611, 821, 5716, 25842, 23195, 5203, 6905, 3320, 80331, 55355, 55…	4583	170	13285	1.60284	2.59352e-05	9.26269e-07	6.56387e-05
GOTERM_BP_DIRECT	GO:0006351~transcription, DNA-templated	663	14.0436	4.72348e-08	7205, 2005, 3280, 332, 29028, 51377, 8125, 25799, 221937, 197407, 22904, 1822, 10614, 29128, 400569, 6497, 11091, 602, 6493, 8409, 204851, 26009, 8028, 57215, 6885, 166, 25788, 3297, 7342, 8725, 1810, 546, 90632, 2023, 6778, 11083, 23636, 5252, 84295, 58487, 8031, 8861, 27086, 55922, 2976, 7332, 22926, 3399, 23522, 8427, 101060200, 328, 329, 6760, 284695, 100101467, 23528, 80854, 339324, 339318, …	4171	1595	11756	1.17158	0.000322939	2.48452e-05	9.28523e-05
UP_SEQ_FEATURE	compositionally biased region:Asp/Glu-rich (acidic)	62	1.31328	5.19056e-08	22978, 4301, 10130, 9601, 3148, 7593, 2149, 3149, 3146, 10956, 10609, 27336, 4212, 3192, 7541, 25820, 26155, 4194, 2122, 3097, 10236, 4193, 7508, 79191, 7337, 1616, 10370, 54926, 5496, 3183, 58496, 4691, 4779, 5757, 7799, 3842, 9669, 10425, 8615, 1460, 6749, 4676, 5763, 83743, 30827, 7528, 4869, 4673, 324, 51588, 9757, 9730, 6666, 10988, 351, 997, 11169, 7913, 1059, 9889, 2960, 2547	4552	100	13191	1.79667	0.000457132	0.0001524	0.000104666
KEGG_PATHWAY	hsa03013:RNA transport	86	1.82165	5.46997e-08	10248, 23511, 10209, 60528, 84305, 8672, 23279, 25929, 4927, 54913, 8668, 59343, 8669, 1974, 1975, 6612, 11097, 1978, 1979, 6613, 9972, 8021, 23225, 51367, 5411, 9818, 96764, 23165, 22985, 1982, 1983, 1981, 7175, 5976, 6607, 3646, 10762, 26986, 55706, 23636, 10460, 79760, 50628, 7514, 26019, 22794, 8761, 1915, 9669, 11171, 11102, 9470, 51808, 9775, 29107, 348995, 8892, 10775, 8894, 132430, 26999,…	1804	143	4809	1.60317	1.58628e-05	3.96572e-06	7.27174e-05
GOTERM_BP_DIRECT	GO:0051301~cell division	161	3.41029	6.1554e-08	8881, 84930, 332, 55844, 115098, 1104, 22974, 54908, 9928, 83879, 387103, 10296, 4926, 10615, 10713, 79003, 8872, 10807, 54892, 11140, 55752, 10907, 79980, 7175, 51434, 51433, 23063, 23126, 201254, 5932, 55038, 55920, 8243, 81610, 11130, 1452, 23397, 113130, 205564, 27183, 22919, 54888, 84612, 6188, 9903, 348235, 2771, 9025, 1069, 83461, 8239, 84790, 3796, 55660, 10801, 23111, 10735, 595, 57542, …	4171	321	11756	1.41364	0.000420818	3.00643e-05	0.000121001
UP_KEYWORDS	Mitochondrion	419	8.87524	7.0443e-08	84273, 27069, 10899, 22906, 2950, 25793, 1727, 204, 90624, 23645, 63933, 1327, 63931, 5366, 123263, 751071, 8725, 85476, 402, 8209, 23787, 23786, 78988, 5250, 23530, 1431, 219, 51499, 27089, 513, 10730, 22921, 8303, 51295, 6472, 518, 517, 515, 401505, 328, 5245, 10884, 7317, 22907, 94081, 522, 521, 6389, 91137, 617, 122704, 55471, 192111, 983, 27166, 28977, 8834, 4967, 6391, 29957, 647087, 729533…	4583	988	13285	1.22933	4.09265e-05	1.41129e-06	0.000103581
GOTERM_CC_DIRECT	GO:0030496~midbody	71	1.50392	7.27446e-08	9600, 332, 23172, 115098, 22933, 10399, 5911, 382, 24137, 10899, 9928, 983, 6513, 1663, 387, 10615, 9493, 9798, 5586, 8502, 259266, 1894, 3619, 10807, 23503, 201163, 84445, 63971, 3309, 55958, 9212, 9585, 2664, 8826, 5501, 9055, 55920, 23255, 51100, 27183, 11104, 4735, 1785, 54434, 6790, 2771, 55165, 1500, 9025, 5347, 1540, 5962, 10112, 7184, 23111, 55143, 5300, 221477, 128866, 23568, 1063, 2773,…	4343	119	12453	1.71079	8.26344e-05	5.90269e-06	0.000116802
GOTERM_MF_DIRECT	GO:0003729~mRNA binding	67	1.41919	7.88679e-08	57721, 11224, 11052, 4204, 6829, 7298, 83939, 51081, 23277, 55544, 84248, 51631, 220988, 80004, 708, 10658, 23034, 9444, 677, 79753, 55421, 23451, 56339, 7884, 3182, 7175, 7247, 5936, 10146, 6193, 6741, 9908, 27257, 6188, 6187, 5511, 27316, 9775, 3320, 23424, 1994, 58517, 104, 811, 9939, 23521, 8563, 51585, 8562, 6625, 2926, 5093, 8661, 127933, 51747, 11315, 5814, 80153, 23283, 10644, 22916, 1064…	4211	109	11857	1.73076	0.000168132	1.68145e-05	0.000136611
UP_KEYWORDS	Viral nucleoprotein	24	0.508367	7.98477e-08	23020, 4670, 6628, 6629, 9343, 9987, 10236, 6625, 55132, 144983, 10492, 26121, 11100, 3189, 3183, 3184, 9724, 3185, 220988, 79026, 3191, 6632, 6631, 3190	4583	27	13285	2.57667	4.63904e-05	1.54638e-06	0.000117409
UP_SEQ_FEATURE	domain:Helicase ATP-binding	62	1.31328	8.71596e-08	6595, 57634, 6597, 8886, 1108, 1106, 1107, 113510, 1105, 9557, 641, 8467, 1662, 1663, 1665, 1974, 23405, 64848, 11325, 90957, 55794, 84181, 9400, 1660, 25788, 9401, 9704, 8458, 1656, 1654, 546, 57062, 1655, 375748, 1659, 9785, 79665, 55760, 170506, 57696, 10521, 57697, 9775, 9879, 55661, 54606, 26781, 11269, 10847, 55308, 10212, 22907, 11218, 80205, 57680, 83479, 9188, 79039, 83990, 7919, 55636, …	4552	101	13191	1.77888	0.000767494	0.000191929	0.000175755
SMART	SM00487:DEXDc	62	1.31328	9.43868e-08	6595, 57634, 6597, 8886, 1108, 1106, 1107, 113510, 1105, 9557, 641, 8467, 1662, 1665, 1974, 23405, 64848, 11325, 23020, 90957, 55794, 84181, 9400, 1660, 25788, 9401, 9704, 8458, 10721, 1656, 1654, 546, 57062, 1655, 375748, 1659, 9785, 79665, 10973, 170506, 10521, 57696, 57697, 9775, 9879, 55661, 54606, 11269, 10847, 55308, 10212, 22907, 11218, 80205, 57680, 83479, 9188, 79039, 83990, 7919, 55636,…	2429	100	6919	1.76607	6.75787e-05	3.37899e-05	0.000142772
GOTERM_CC_DIRECT	GO:0019013~viral nucleocapsid	24	0.508367	1.00211e-07	23020, 4670, 6628, 6629, 9343, 9987, 10236, 6625, 55132, 144983, 10492, 26121, 11100, 3189, 3183, 3184, 9724, 3185, 220988, 79026, 3191, 6632, 6631, 3190	4343	27	12453	2.54878	0.000113833	7.58925e-06	0.000160902
GOTERM_BP_DIRECT	GO:0010467~gene expression	35	0.741368	1.16547e-07	7597, 57721, 5434, 5435, 5438, 27316, 10949, 220988, 3191, 3192, 3190, 5441, 4670, 64083, 10236, 5093, 5094, 56339, 5725, 9589, 3187, 355, 2962, 10643, 3183, 10644, 3184, 22916, 3185, 10642, 5431, 5430, 5433, 3181, 5432	4171	46	11756	2.14452	0.000796631	5.31285e-05	0.000229103
INTERPRO	IPR001650:Helicase, C-terminal	61	1.2921	1.18153e-07	6595, 57634, 6597, 8886, 1108, 1106, 1107, 113510, 1105, 9557, 641, 8467, 1662, 1665, 1974, 23405, 64848, 11325, 23020, 90957, 55794, 84181, 9400, 1660, 25788, 9401, 9704, 8458, 10721, 1656, 1654, 546, 57062, 1655, 375748, 1659, 9785, 79665, 10973, 170506, 57696, 10521, 57697, 9775, 9879, 55661, 54606, 11269, 10847, 55308, 10212, 22907, 11218, 80205, 57680, 83479, 9188, 79039, 7919, 55636, 9416	4344	99	12512	1.77473	0.000550913	0.000137757	0.000223205
UP_SEQ_FEATURE	domain:RRM 2	56	1.18619	1.24966e-07	144983, 27332, 6421, 125950, 27336, 220988, 3191, 10137, 80004, 29890, 10658, 26528, 4841, 64783, 10236, 64062, 8683, 3187, 11338, 3189, 9584, 3182, 7073, 389677, 3184, 5939, 3185, 5936, 3181, 10432, 4691, 26986, 9782, 9987, 8761, 23013, 1994, 10949, 10262, 132430, 6626, 4670, 9991, 6629, 22827, 55147, 6430, 2926, 10492, 5725, 10643, 23435, 10644, 10642, 6429, 6426	4552	89	13191	1.82336	0.00110022	0.000220141	0.000251991
UP_SEQ_FEATURE	domain:RRM 1	56	1.18619	1.24966e-07	144983, 27332, 6421, 125950, 27336, 220988, 3191, 10137, 80004, 29890, 10658, 26528, 4841, 64783, 10236, 64062, 8683, 3187, 11338, 3189, 9584, 3182, 7073, 389677, 3184, 5939, 3185, 5936, 3181, 10432, 4691, 26986, 9782, 9987, 8761, 23013, 1994, 10949, 10262, 132430, 6626, 4670, 9991, 6629, 22827, 55147, 6430, 2926, 10492, 5725, 10643, 23435, 10644, 10642, 6429, 6426	4552	89	13191	1.82336	0.00110022	0.000220141	0.000251991
GOTERM_CC_DIRECT	GO:0022625~cytosolic large ribosomal subunit	43	0.910824	1.29186e-07	11224, 6181, 6147, 9349, 6122, 6141, 6160, 6124, 6125, 6143, 6161, 6164, 4736, 55744, 6165, 6168, 6167, 6169, 51154, 6138, 6137, 26156, 6171, 6135, 6170, 6132, 23521, 6130, 6155, 6154, 6838, 6159, 6158, 6176, 6157, 6175, 7311, 6156, 51187, 25873, 200916, 6128, 285855	4343	62	12453	1.98866	0.000146744	9.17216e-06	0.000207426
UP_KEYWORDS	DNA repair	139	2.94429	1.42592e-07	22976, 3146, 9557, 51377, 5536, 6421, 8930, 27339, 146956, 29128, 2956, 675, 23503, 55031, 672, 25, 25788, 51567, 11284, 10721, 546, 56647, 58493, 84939, 23064, 9643, 201254, 5932, 9156, 8243, 55215, 7515, 7516, 10273, 2072, 84126, 348654, 7415, 404672, 9907, 6188, 57697, 9025, 1069, 259282, 2175, 6749, 1643, 29089, 7520, 10111, 2177, 1642, 5429, 7528, 328, 5426, 4436, 65123, 2305, 55170, 3014, 2…	4583	279	13285	1.44418	8.28425e-05	2.67245e-06	0.00020967
SMART	SM00490:HELICc	61	1.2921	1.67146e-07	6595, 57634, 6597, 8886, 1108, 1106, 1107, 113510, 1105, 9557, 641, 8467, 1662, 1665, 1974, 23405, 64848, 11325, 23020, 90957, 55794, 84181, 9400, 1660, 25788, 9401, 9704, 8458, 10721, 1656, 1654, 546, 57062, 1655, 375748, 1659, 9785, 79665, 10973, 170506, 57696, 10521, 57697, 9775, 9879, 55661, 54606, 11269, 10847, 55308, 10212, 22907, 11218, 80205, 57680, 83479, 9188, 79039, 7919, 55636, 9416	2429	99	6919	1.75513	0.00011967	3.98915e-05	0.000252829
UP_KEYWORDS	Protein biosynthesis	77	1.63101	2.35891e-07	1936, 5917, 1939, 6829, 1938, 10209, 1937, 83939, 8672, 10480, 143244, 8668, 8669, 1974, 27335, 1975, 91574, 1979, 6924, 2107, 2617, 7284, 51520, 7407, 23367, 3396, 3692, 833, 1982, 123263, 1983, 10767, 10102, 1981, 84337, 6875, 1984, 85476, 3646, 2058, 55157, 283459, 6301, 2935, 51067, 1915, 16, 9669, 7965, 9470, 8892, 4677, 23395, 8894, 9521, 8565, 8562, 3735, 1968, 51386, 8662, 1965, 8661, 866…	4583	136	13285	1.64121	0.000137043	4.28289e-06	0.000346859
UP_KEYWORDS	Mitosis	124	2.62656	2.4178e-07	8881, 84930, 332, 55844, 1104, 22974, 10899, 54908, 387103, 4926, 10615, 79003, 54892, 55958, 10907, 79980, 7175, 51434, 51433, 23063, 201254, 5932, 55920, 8243, 81610, 11130, 1452, 23397, 113130, 51203, 5048, 22919, 54888, 6188, 9903, 348235, 55165, 1069, 9025, 83461, 5347, 8239, 3796, 10735, 57542, 699, 79441, 3833, 3832, 1063, 257364, 1062, 26271, 994, 9181, 899, 995, 91272, 9184, 891, 10600, …	4583	245	13285	1.46713	0.000140464	4.25679e-06	0.000355518
UP_SEQ_FEATURE	domain:Helicase C-terminal	59	1.24974	2.93001e-07	6595, 57634, 6597, 1108, 8886, 1106, 1107, 113510, 1105, 9557, 641, 8467, 1662, 1665, 1974, 23405, 64848, 11325, 90957, 55794, 84181, 9400, 1660, 25788, 9401, 9704, 8458, 1656, 1654, 546, 57062, 1655, 375748, 1659, 9785, 79665, 170506, 57696, 10521, 57697, 9775, 9879, 55661, 54606, 26781, 11269, 10847, 55308, 10212, 22907, 11218, 80205, 57680, 83479, 9188, 79039, 7919, 55636, 9416	4552	97	13191	1.76261	0.00257771	0.000430081	0.000590827
GOTERM_CC_DIRECT	GO:0005694~chromosome	56	1.18619	3.15769e-07	2091, 3149, 8886, 339230, 22933, 24137, 10919, 11198, 23272, 4926, 5885, 29781, 51663, 672, 83903, 23067, 9400, 9401, 79813, 9869, 10721, 23476, 29072, 23063, 5930, 64324, 5932, 10051, 8243, 113130, 51203, 10362, 57659, 23481, 9126, 253461, 259282, 6749, 83695, 80764, 55661, 51514, 10735, 8899, 55870, 7150, 7156, 7468, 80854, 1062, 54904, 80204, 285498, 1059, 50809, 83932	4343	90	12453	1.78414	0.00035865	2.11006e-05	0.000507011
INTERPRO	IPR011545:DNA/RNA helicase, DEAD/DEAH box type, N-terminal	41	0.86846	4.33284e-07	79665, 10973, 170506, 8886, 113510, 57696, 10521, 641, 1662, 9775, 1665, 9879, 1974, 23405, 64848, 55661, 11325, 54606, 23020, 90957, 55794, 11269, 55308, 10212, 9400, 22907, 11218, 1660, 9401, 9704, 10721, 1656, 57062, 1654, 1655, 83479, 9188, 9785, 79039, 7919, 9416	4344	60	12512	1.9682	0.00201879	0.000404085	0.000818522
GOTERM_BP_DIRECT	GO:0007067~mitotic nuclear division	119	2.52065	5.00877e-07	8881, 84930, 332, 55844, 1104, 22974, 10899, 5536, 10540, 387103, 4927, 4926, 79003, 56992, 54892, 25, 55958, 10907, 55193, 7175, 51434, 51433, 201254, 5932, 23636, 55920, 81610, 1452, 113130, 5048, 22919, 54888, 10270, 9221, 6188, 9903, 348235, 55165, 1069, 9025, 83461, 5347, 8239, 10735, 57542, 699, 79441, 3832, 3835, 1063, 257364, 26271, 994, 9181, 899, 995, 91272, 1639, 10600, 136647, 54801, …	4171	230	11756	1.45827	0.00341914	0.000214039	0.0009846
GOTERM_BP_DIRECT	GO:0016925~protein sumoylation	67	1.41919	5.03023e-07	23511, 8535, 84733, 5893, 53335, 332, 23279, 641, 4927, 59343, 6612, 26036, 6117, 11097, 5885, 6613, 3190, 9972, 10155, 8021, 51564, 23225, 10055, 10054, 3619, 672, 9818, 56160, 4193, 84901, 7508, 23165, 9063, 9212, 7175, 3183, 9112, 6015, 10762, 55706, 8243, 23636, 8554, 205564, 348995, 9126, 1069, 5111, 54780, 10735, 55143, 5905, 79677, 26054, 7150, 7155, 7153, 51588, 8086, 7157, 10210, 7158, 5…	4171	113	11756	1.67115	0.00343376	0.000202313	0.000988819
GOTERM_CC_DIRECT	GO:0000785~chromatin	53	1.12264	6.28679e-07	10951, 6421, 3726, 8930, 84629, 5885, 23304, 3151, 55719, 9500, 10473, 55806, 10769, 25836, 114799, 5976, 57597, 4221, 23063, 3646, 11335, 824, 55723, 79723, 64710, 79366, 8091, 5514, 25909, 80335, 9126, 5347, 5422, 4780, 4094, 221037, 9324, 10735, 7112, 26057, 4176, 3835, 1019, 3159, 1063, 5901, 4171, 5469, 7319, 11315, 7320, 3065, 51780	4343	85	12453	1.78789	0.000713924	3.96758e-05	0.00100943
UP_KEYWORDS	Translation regulation	55	1.16501	6.32421e-07	26164, 83939, 10399, 84305, 8672, 9698, 9148, 1978, 1979, 23034, 9444, 23645, 207, 5036, 208, 1982, 6198, 1981, 1654, 27327, 29883, 55037, 440275, 2058, 4690, 51204, 26065, 22794, 6895, 5611, 6188, 25946, 2872, 9470, 9775, 23019, 2597, 57690, 23112, 10985, 9939, 57472, 23521, 10492, 1965, 92170, 10643, 10644, 22916, 55571, 10642, 51247, 85451, 84919, 9337	4583	90	13285	1.77146	0.000367369	1.08069e-05	0.00092992
GOTERM_BP_DIRECT	GO:0006260~DNA replication	80	1.69456	6.44404e-07	63922, 54107, 7126, 8318, 983, 641, 11198, 283899, 5985, 6418, 6117, 116028, 90381, 81620, 64785, 5928, 672, 10535, 9400, 1854, 9401, 54962, 84897, 54921, 29803, 5976, 472, 55035, 55704, 5930, 10432, 6742, 23411, 5932, 5931, 9156, 8888, 10524, 56652, 25942, 4774, 6240, 84126, 6241, 51659, 51550, 5422, 4678, 6749, 83695, 10111, 5111, 51514, 5763, 4173, 23594, 4172, 5428, 4175, 5429, 4174, 10036, 4…	4171	142	11756	1.58789	0.00439674	0.000244772	0.00126674
GOTERM_BP_DIRECT	GO:0006281~DNA repair	113	2.39356	6.59086e-07	9557, 51377, 5536, 8930, 146956, 29128, 2956, 10155, 672, 11284, 10721, 546, 56647, 472, 4221, 58493, 84939, 8295, 201254, 5932, 9643, 9156, 8243, 55215, 1453, 1454, 7516, 10273, 2072, 348654, 7415, 6188, 1647, 5422, 259282, 2175, 6749, 1643, 29089, 10111, 2177, 1642, 5429, 5424, 328, 5426, 4436, 65123, 3835, 2305, 27301, 7319, 7320, 7323, 79035, 79447, 2968, 83932, 2967, 79184, 988, 571, 83444, …	4171	217	11756	1.4677	0.00449669	0.000237174	0.0012956
UP_KEYWORDS	Apoptosis	202	4.27875	1.39691e-06	7494, 55749, 1191, 4205, 84273, 8887, 27069, 332, 330, 10899, 63916, 22900, 23136, 6495, 57761, 6093, 4217, 3094, 23645, 25, 90525, 6885, 207, 208, 5366, 84681, 7073, 8312, 23787, 23786, 11083, 1459, 51499, 7188, 7187, 7186, 2597, 54476, 7046, 8445, 9994, 2308, 10313, 329, 2309, 55201, 7323, 51283, 23239, 51537, 840, 983, 27166, 8837, 8462, 56005, 708, 5134, 11235, 2122, 581, 5609, 835, 64975, 61…	4583	445	13285	1.31584	0.000811276	2.31884e-05	0.00205402
GOTERM_BP_DIRECT	GO:0000122~negative regulation of transcription from RNA polymerase II promoter	272	5.76149	1.48575e-06	170959, 7494, 4204, 2005, 7753, 3720, 4205, 3280, 3281, 3476, 6208, 23650, 3726, 1822, 10614, 29128, 84678, 4212, 6498, 6497, 6495, 171023, 57761, 6493, 51564, 1487, 8409, 7743, 166, 3297, 79813, 10472, 6879, 7071, 7175, 8725, 342371, 1810, 4221, 6601, 6778, 2022, 4609, 54880, 7227, 4774, 55729, 27086, 7189, 92140, 7040, 23013, 23019, 5347, 3399, 8239, 4783, 4094, 84792, 811, 2308, 2309, 5245, 23…	4171	609	11756	1.25884	0.0101082	0.000507851	0.0029206
INTERPRO	IPR001965:Zinc finger, PHD-type	53	1.12264	1.48767e-06	4302, 1108, 55904, 1107, 79142, 23613, 23469, 7994, 29128, 84678, 51773, 10155, 5927, 83860, 8028, 51230, 54620, 4297, 8193, 58508, 57661, 64324, 9682, 10765, 11083, 5252, 84295, 22992, 6941, 11176, 6942, 11177, 23774, 26147, 22823, 30827, 23522, 55870, 7468, 9757, 54904, 8085, 57649, 10743, 55632, 8805, 79960, 51317, 148479, 23338, 2186, 9031, 7862	4344	87	12512	1.75466	0.00691448	0.00115575	0.00281035
SMART	SM00249:PHD	53	1.12264	2.02439e-06	4302, 1108, 55904, 1107, 79142, 23613, 23469, 7994, 29128, 84678, 51773, 10155, 5927, 83860, 8028, 51230, 54620, 4297, 8193, 58508, 57661, 64324, 9682, 10765, 11083, 5252, 84295, 22992, 6941, 11176, 6942, 11177, 23774, 26147, 22823, 30827, 23522, 55870, 7468, 9757, 54904, 8085, 57649, 10743, 55632, 8805, 79960, 51317, 148479, 23338, 2186, 9031, 7862	2429	87	6919	1.73529	0.00144841	0.0003623	0.0030621
GOTERM_CC_DIRECT	GO:0043234~protein complex	163	3.45266	2.2414e-06	7290, 22873, 2644, 3148, 1191, 1108, 330, 5634, 5536, 5636, 2288, 488, 284119, 5018, 10613, 25793, 6418, 1978, 6498, 6497, 602, 79598, 675, 672, 3207, 8874, 8028, 476, 4193, 2752, 9738, 207, 3297, 84991, 4221, 6601, 11331, 4609, 55723, 9369, 8861, 51100, 7414, 1785, 51499, 821, 2783, 84612, 7189, 10010, 3320, 9219, 4090, 1643, 9770, 4091, 9810, 117178, 5428, 7529, 93, 329, 10419, 25994, 53615, 33…	4343	346	12453	1.35081	0.00254299	0.000134003	0.00359882
GOTERM_CC_DIRECT	GO:0042470~melanosome	55	1.16501	2.42901e-06	10130, 9601, 2644, 682, 5479, 191, 6513, 6520, 2194, 535, 483, 84079, 9145, 304, 10961, 7037, 476, 5034, 3309, 10575, 6510, 3916, 5879, 10972, 6184, 9367, 967, 10672, 9905, 3312, 821, 1497, 55161, 10015, 3320, 23193, 80331, 5868, 1509, 1508, 7184, 2040, 5862, 813, 7529, 2923, 4673, 5052, 3326, 11021, 5901, 1213, 7534, 23385, 7531	4343	92	12453	1.71419	0.00275555	0.000137958	0.00390004
GOTERM_BP_DIRECT	GO:0006406~mRNA export from nucleus	55	1.16501	2.75061e-06	23511, 23279, 4927, 84248, 11097, 9972, 8021, 23225, 53981, 54890, 9818, 9877, 7979, 8683, 23165, 9295, 7307, 7884, 11338, 7175, 1984, 5976, 3181, 9785, 84811, 10762, 55706, 23636, 26019, 22794, 23293, 9775, 29107, 348995, 10569, 9939, 6432, 8563, 11269, 6430, 55308, 10212, 8086, 5903, 26097, 22916, 6429, 6428, 10250, 23049, 7919, 6427, 23381, 3267, 6426	4171	91	11756	1.70349	0.0186329	0.000895251	0.00540691
GOTERM_CC_DIRECT	GO:0005819~spindle	64	1.35564	2.75691e-06	8881, 10951, 332, 22933, 55183, 22974, 10899, 9857, 10296, 27339, 9859, 4926, 10927, 9493, 27130, 7803, 56992, 3619, 283489, 83903, 2908, 5607, 207, 9212, 9587, 472, 9055, 11083, 11335, 1453, 4739, 51203, 11104, 4735, 22919, 54888, 23354, 6790, 5347, 1540, 7272, 10112, 57542, 80097, 55201, 79441, 3833, 1877, 23568, 3832, 1063, 26271, 9371, 996, 9181, 7756, 1639, 1211, 4627, 1213, 4628, 23384, 548…	4343	112	12453	1.6385	0.00312696	0.000149125	0.00442652
UP_KEYWORDS	Virion	24	0.508367	2.81028e-06	23020, 4670, 6628, 6629, 9343, 9987, 10236, 6625, 55132, 144983, 10492, 26121, 11100, 3189, 3183, 3184, 9724, 3185, 220988, 79026, 3191, 6632, 6631, 3190	4583	30	13285	2.31901	0.00163144	4.53539e-05	0.00413222
UP_KEYWORDS	rRNA-binding	20	0.423639	2.93015e-06	6147, 6135, 387338, 6132, 55794, 6125, 60493, 6205, 22868, 26284, 6167, 10436, 6203, 284119, 80135, 6222, 55272, 84678, 6191, 55037	4583	23	13285	2.52066	0.00170097	4.60103e-05	0.00430846
GOTERM_CC_DIRECT	GO:0071013~catalytic step 2 spliceosome	52	1.10146	3.01916e-06	988, 9343, 10291, 10992, 27339, 220988, 3192, 3190, 23020, 5411, 10236, 23451, 23450, 55596, 7307, 3187, 3183, 3185, 1655, 3181, 1659, 9785, 26986, 57461, 6637, 6636, 6633, 6634, 23398, 57703, 9092, 25949, 27316, 9775, 10946, 27258, 10569, 23524, 9939, 4670, 8899, 6628, 6629, 10492, 8175, 10286, 51639, 10594, 6632, 10250, 9416, 6426	4343	86	12453	1.73376	0.0034239	0.000155886	0.00484757
GOTERM_MF_DIRECT	GO:0004004~ATP-dependent RNA helicase activity	38	0.804914	3.03748e-06	79665, 55760, 170506, 8886, 57696, 10521, 1662, 9775, 1665, 9879, 1974, 64848, 55661, 11325, 54606, 23020, 90957, 55794, 11269, 55308, 10212, 22907, 11218, 1660, 9704, 1656, 57062, 1654, 5976, 1655, 83479, 10146, 1659, 9188, 9785, 79039, 7919, 9416	4211	56	11857	1.91067	0.00645499	0.000588546	0.00526124
UP_SEQ_FEATURE	domain:RRM	57	1.20737	3.51602e-06	11052, 51574, 140890, 155435, 113251, 55544, 1975, 1153, 29896, 8871, 27037, 23067, 9739, 9295, 7307, 92400, 3183, 84991, 27327, 81892, 55035, 10146, 4850, 5935, 85437, 6741, 79869, 2130, 54439, 9908, 27316, 23350, 8148, 57690, 84365, 58517, 29777, 2521, 23112, 6432, 9939, 10180, 79171, 22828, 6625, 8662, 127933, 8666, 9667, 23283, 22916, 51639, 7458, 6428, 11066, 23082, 6427	4552	98	13191	1.68548	0.0304979	0.00441489	0.00708973
UP_SEQ_FEATURE	compositionally biased region:Glu-rich	111	2.3512	3.9989e-06	9648, 55749, 26168, 22976, 23513, 1106, 25962, 155435, 27333, 27332, 9748, 25792, 84678, 51773, 6093, 54623, 64746, 23067, 55421, 23645, 23, 157697, 9739, 22985, 10915, 80829, 6601, 10146, 10142, 23786, 57553, 51593, 9908, 22998, 10322, 55729, 57050, 2314, 23481, 3320, 51306, 58517, 139285, 5962, 151987, 90933, 286262, 65095, 10514, 26058, 284695, 8661, 2778, 221092, 10075, 2962, 23286, 51186, 55…	4552	224	13191	1.43599	0.0346131	0.00439361	0.00806337
GOTERM_BP_DIRECT	GO:0006396~RNA processing	54	1.14383	4.67187e-06	196441, 1477, 51574, 10291, 51729, 23405, 3191, 22803, 3192, 64848, 3190, 90957, 27037, 1660, 9704, 3187, 3189, 162989, 9584, 3184, 3185, 5939, 5936, 5935, 23064, 1659, 10147, 6741, 79665, 23536, 170506, 9987, 10171, 6634, 8761, 10521, 11100, 10523, 23350, 25804, 9128, 104, 103, 57018, 8446, 6433, 10180, 2926, 22907, 1736, 10492, 11218, 6632, 79039	4171	90	11756	1.69111	0.0314414	0.00145105	0.00918339
UP_KEYWORDS	Citrullination	38	0.804914	4.84291e-06	8969, 6147, 117246, 8338, 6124, 6143, 2033, 3005, 57050, 3006, 6205, 3008, 6187, 9774, 92815, 8364, 3192, 23076, 79080, 8971, 10155, 8367, 7112, 10514, 126961, 23521, 23212, 23451, 51018, 3021, 11168, 8336, 10250, 8334, 8358, 4839, 8356, 8330	4583	58	13285	1.89919	0.00280978	7.4043e-05	0.00712087
GOTERM_BP_DIRECT	GO:0001731~formation of translation preinitiation complex	18	0.381275	7.35883e-06	1939, 8562, 1968, 51386, 8662, 8661, 8667, 8666, 10480, 8664, 1983, 8668, 8669, 27335, 1975, 7458, 3646, 90381	4171	20	11756	2.53666	0.0490748	0.00218543	0.0144647
UP_SEQ_FEATURE	compositionally biased region:Lys-rich	61	1.2921	8.22274e-06	55684, 51575, 29123, 51574, 23131, 83444, 6124, 9555, 29855, 10923, 51329, 55023, 23077, 57620, 5927, 83860, 84181, 55226, 9208, 24149, 254048, 51230, 23505, 96764, 5978, 219541, 23168, 400506, 23476, 84897, 58506, 26017, 55216, 56987, 65980, 222194, 64710, 10528, 54883, 11103, 57696, 55167, 11176, 3320, 23091, 259282, 23524, 10412, 51585, 7150, 394, 10210, 5469, 80205, 51602, 9667, 891, 10250, 9…	4552	109	13191	1.62173	0.0698733	0.00801597	0.0165797
UP_SEQ_FEATURE	short sequence motif:Q motif	25	0.529549	8.26402e-06	54606, 55794, 26781, 11269, 8886, 55308, 10212, 11218, 57696, 10521, 1662, 9775, 1656, 9879, 1974, 57062, 1654, 1655, 83479, 9188, 79039, 7919, 55661, 11325, 9416	4552	33	13191	2.19534	0.0702114	0.00725337	0.0166629
GOTERM_BP_DIRECT	GO:0043488~regulation of mRNA stability	57	1.20737	9.10023e-06	8570, 9861, 5686, 5685, 8125, 54512, 5683, 9491, 9698, 6418, 10197, 79882, 23404, 23034, 8021, 678, 677, 3304, 5708, 5709, 55795, 5706, 5707, 5691, 5704, 5705, 5702, 7314, 5695, 5701, 207, 7311, 5688, 5689, 1981, 3184, 26986, 5717, 5718, 7514, 9261, 5710, 3312, 5713, 118460, 3842, 5716, 1994, 23016, 22894, 51441, 7529, 328, 26135, 7316, 6233, 7534	4171	98	11756	1.63934	0.0603311	0.00258946	0.0178874
GOTERM_BP_DIRECT	GO:0000209~protein polyubiquitination	88	1.86401	9.53327e-06	55905, 57674, 642, 26263, 9861, 5686, 5685, 5683, 9491, 10616, 27339, 25897, 10197, 23759, 23304, 56254, 25820, 9690, 51132, 11236, 5708, 5709, 79791, 5706, 5707, 6737, 5691, 5704, 5705, 5702, 5695, 7314, 22888, 5701, 7311, 26118, 5688, 26001, 5689, 55658, 8454, 5930, 5717, 64750, 5718, 57154, 865, 10273, 868, 8945, 5710, 5713, 10425, 5716, 22954, 7189, 7332, 10277, 23295, 7336, 1643, 9320, 267, …	4171	168	11756	1.47636	0.0631095	0.00260416	0.0187385
GOTERM_BP_DIRECT	GO:0006355~regulation of transcription, DNA-templated	496	10.5062	9.58999e-06	8880, 7205, 3280, 29028, 51377, 8125, 25799, 197407, 22904, 8324, 2957, 22803, 2958, 6495, 6493, 8216, 204851, 26009, 57215, 25788, 23509, 546, 2022, 5252, 84295, 8861, 22921, 7332, 2971, 6749, 811, 8427, 23522, 328, 101060200, 329, 5245, 323, 27097, 51385, 100101467, 55206, 80854, 339324, 1831, 339318, 84874, 388569, 2960, 51282, 8848, 2967, 7597, 6595, 55900, 7593, 571, 146198, 6597, 10856, 759…	4171	1203	11756	1.16208	0.0634728	0.002519	0.01885
GOTERM_CC_DIRECT	GO:0022627~cytosolic small ribosomal subunit	27	0.571913	1.19353e-05	1939, 83939, 6205, 6206, 6208, 6209, 6188, 6187, 55168, 2197, 3921, 6217, 6230, 6233, 6203, 6229, 6202, 6228, 6201, 6227, 6224, 6223, 1654, 6222, 6191, 6193, 6194	4343	37	12453	2.09241	0.0134671	0.00058933	0.0191621
UP_KEYWORDS	mRNA transport	52	1.10146	1.29421e-05	23511, 8570, 144983, 10204, 23279, 4927, 6830, 143244, 84248, 59343, 11097, 9972, 8021, 9444, 677, 23225, 55421, 9818, 9877, 23165, 7175, 1984, 3181, 10762, 55706, 23636, 8888, 9908, 7514, 22794, 4641, 25909, 9775, 348995, 6432, 9939, 8563, 11269, 55308, 8086, 5903, 26097, 10128, 10643, 10644, 22916, 10642, 55677, 6428, 7919, 3267, 6426	4583	90	13285	1.67484	0.00749118	0.000192786	0.0190286
GOTERM_BP_DIRECT	GO:0016567~protein ubiquitination	144	3.0502	1.41197e-05	140459, 55236, 26262, 332, 57674, 330, 55182, 26267, 23276, 26268, 25793, 64219, 400569, 23077, 9040, 10155, 130507, 9655, 25820, 9443, 50717, 84133, 4194, 672, 56995, 57563, 79699, 4193, 207, 55958, 140461, 409, 9867, 64326, 440590, 54797, 56929, 23066, 84085, 57154, 10273, 7415, 8945, 81559, 10425, 9903, 55167, 7188, 7187, 7332, 83461, 7336, 5347, 221687, 55527, 9021, 122769, 4780, 90933, 10116…	4171	303	11756	1.33949	0.0920367	0.00356959	0.0277524
GOTERM_BP_DIRECT	GO:0008283~cell proliferation	140	2.96547	1.65638e-05	8881, 10208, 7295, 23513, 7298, 55239, 7296, 8744, 22974, 4898, 10540, 2648, 80381, 10298, 6491, 2296, 29128, 6497, 6495, 678, 677, 56992, 4194, 3487, 2752, 207, 5036, 7071, 7345, 3491, 11333, 3911, 26354, 10728, 11334, 4609, 5931, 81610, 51593, 1434, 22919, 5045, 310, 23481, 10730, 8301, 2771, 1841, 7332, 6941, 10011, 7336, 5347, 5422, 7520, 4233, 10736, 55003, 8851, 8566, 64083, 4176, 598, 699,…	4171	294	11756	1.34215	0.107085	0.00403697	0.0325554
GOTERM_MF_DIRECT	GO:0042393~histone binding	55	1.16501	1.66578e-05	6595, 1106, 29028, 1104, 8125, 10541, 8467, 23613, 11198, 6830, 6418, 29128, 51460, 8364, 51773, 56254, 8367, 26155, 126961, 5928, 1514, 1616, 546, 9960, 8358, 23411, 55705, 8356, 55723, 84295, 10527, 81611, 5757, 114803, 25842, 144108, 11176, 9025, 23774, 6907, 55355, 8520, 57713, 4869, 55170, 3014, 4171, 57649, 3021, 57680, 7913, 51317, 10600, 1164, 27000	4211	95	11857	1.63015	0.0348914	0.00295518	0.0288498
INTERPRO	IPR019787:Zinc finger, PHD-finger	46	0.97437	1.68958e-05	4302, 5252, 1108, 55904, 1107, 22992, 79142, 23613, 23469, 11176, 11177, 7994, 23774, 29128, 84678, 26147, 51773, 10155, 22823, 23522, 30827, 5927, 83860, 55870, 7468, 8028, 9757, 54620, 54904, 4297, 57649, 8085, 8193, 8805, 79960, 51317, 58508, 57661, 148479, 9031, 23338, 2186, 64324, 7862, 10765, 11083	4344	77	12512	1.7207	0.0757777	0.0111944	0.0319134
GOTERM_BP_DIRECT	GO:0006977~DNA damage response, signal transduction by p53 class mediator resulting in cell cycle arrest	39	0.826096	1.72512e-05	2810, 7027, 2033, 6659, 51499, 1027, 25946, 983, 6790, 55544, 23019, 1647, 51512, 5325, 5111, 3276, 57472, 4194, 4869, 581, 1017, 4193, 7316, 7314, 7157, 6233, 7311, 835, 10769, 85456, 995, 5527, 55571, 472, 5934, 891, 4850, 29883, 9337	4171	61	11756	1.802	0.111273	0.00405949	0.0339063
GOTERM_BP_DIRECT	GO:0006369~termination of RNA polymerase II transcription	39	0.826096	1.72512e-05	79869, 1477, 6637, 6636, 22794, 6634, 10978, 29101, 9775, 84967, 4150, 10569, 9939, 6432, 53981, 6628, 8563, 51585, 6430, 10212, 9877, 8683, 26097, 9295, 8458, 7307, 7884, 11338, 10914, 22916, 54797, 6429, 6428, 10250, 23064, 9785, 7919, 6427, 6426	4171	61	11756	1.802	0.111273	0.00405949	0.0339063
GOTERM_MF_DIRECT	GO:0019843~rRNA binding	27	0.571913	1.72987e-05	6147, 387338, 60493, 6205, 90459, 26284, 51081, 130916, 6167, 55272, 84154, 84678, 64960, 6135, 55794, 55052, 6132, 22868, 51119, 10436, 6203, 54948, 6222, 9188, 6191, 6193, 55037	4211	37	11857	2.05472	0.0362093	0.00283299	0.0299597
GOTERM_BP_DIRECT	GO:0070125~mitochondrial translational elongation	48	1.01673	1.7393e-05	9801, 122704, 6182, 51650, 51021, 54534, 51081, 9553, 28977, 55168, 124995, 64960, 51258, 29088, 64983, 128308, 118487, 64981, 63875, 54998, 55052, 10884, 64432, 7284, 65993, 51649, 3396, 64949, 63931, 51073, 64975, 54460, 26589, 51264, 64928, 64976, 10102, 64979, 65005, 57129, 54948, 85476, 219927, 29074, 23107, 84545, 84311, 55037	4171	80	11756	1.69111	0.112134	0.00395664	0.034185
UP_SEQ_FEATURE	zinc finger region:PHD-type 1	24	0.508367	1.76245e-05	22823, 4302, 5252, 23522, 5927, 1108, 1107, 8028, 7468, 9757, 54904, 4297, 8085, 57649, 55632, 8193, 79960, 58508, 7994, 2186, 26147, 9682, 64324, 10765	4552	32	13191	2.17339	0.143803	0.014015	0.0355333
UP_SEQ_FEATURE	domain:Post-SET	15	0.317729	1.8484e-05	79723, 55870, 6839, 23067, 7468, 9757, 9739, 54904, 4297, 10919, 8085, 9869, 58508, 29072, 64324	4552	16	13191	2.71673	0.150262	0.0134773	0.0372659
UP_SEQ_FEATURE	compositionally biased region:Arg-rich	60	1.27092	1.93603e-05	11052, 9967, 55749, 1198, 56252, 55132, 55082, 27332, 92856, 83879, 1975, 55272, 51773, 10713, 23215, 79753, 64746, 5411, 3097, 64783, 64061, 64062, 54620, 80829, 84950, 57661, 58506, 29072, 5598, 84811, 11083, 79869, 51593, 54439, 57703, 29102, 10523, 23013, 84327, 55668, 9879, 58517, 29088, 9169, 23524, 26058, 55147, 22828, 168455, 91746, 10210, 8085, 9667, 54581, 10250, 11066, 23082, 84717, 15…	4552	109	13191	1.59515	0.156796	0.0130333	0.0390324
INTERPRO	IPR014014:RNA helicase, DEAD-box type, Q motif	24	0.508367	1.97093e-05	54606, 55794, 11269, 8886, 10212, 55308, 11218, 57696, 10521, 1662, 9775, 1656, 1974, 9879, 1654, 57062, 1655, 83479, 9188, 79039, 7919, 55661, 11325, 9416	4344	32	12512	2.16022	0.0878266	0.0114249	0.0372267
GOTERM_BP_DIRECT	GO:1900034~regulation of cellular response to heat	45	0.953188	2.10974e-05	23636, 9530, 9531, 23511, 2033, 2932, 9261, 3281, 3337, 3312, 23279, 2288, 2475, 4927, 3320, 348995, 1387, 11097, 6117, 9529, 9972, 3305, 8021, 3304, 23225, 10808, 9818, 57521, 3326, 8086, 3297, 23165, 5903, 64223, 7266, 7175, 472, 26353, 7531, 10728, 10762, 23411, 55706, 27000, 5594	4171	74	11756	1.71396	0.134342	0.00464292	0.0414643
GOTERM_BP_DIRECT	GO:0051437~positive regulation of ubiquitin-protein ligase activity involved in regulation of mitotic cell cycle transition	44	0.932006	2.24219e-05	5717, 8881, 5718, 5710, 8945, 9861, 5686, 5713, 5685, 5683, 983, 5716, 9491, 51343, 10197, 5347, 51529, 5708, 11065, 5709, 5706, 5707, 5691, 5704, 5705, 7316, 5702, 26271, 5695, 7314, 5701, 6233, 7311, 996, 5688, 7321, 5689, 7324, 8454, 9184, 51434, 51433, 29882, 891	4171	72	11756	1.72242	0.142147	0.00477986	0.0440668
GOTERM_MF_DIRECT	GO:0004842~ubiquitin-protein transferase activity	137	2.90193	2.32128e-05	10206, 332, 26262, 57674, 26263, 330, 55182, 26267, 23276, 10299, 10616, 10296, 27339, 26268, 25793, 63893, 9148, 29128, 54813, 9040, 23304, 10155, 130507, 25820, 84133, 79791, 672, 57563, 79699, 4193, 81847, 55958, 7337, 26001, 80829, 54926, 64326, 9867, 440590, 149603, 5930, 25831, 57154, 54880, 10273, 7327, 7326, 8945, 10425, 9903, 7189, 7188, 7187, 7186, 7332, 23295, 9025, 54476, 221687, 1643…	4211	288	11857	1.33942	0.0482856	0.00352878	0.0402004
GOTERM_BP_DIRECT	GO:0042787~protein ubiquitination involved in ubiquitin-dependent protein catabolic process	75	1.58865	2.38279e-05	8881, 55709, 53339, 55236, 10956, 26267, 983, 80311, 10296, 25898, 22903, 25897, 25793, 29128, 54813, 25820, 51529, 9690, 8405, 57563, 81847, 84447, 4193, 7314, 7311, 9212, 55658, 8454, 8453, 89910, 8451, 51434, 8450, 51433, 29882, 5930, 25831, 64750, 57154, 10273, 10425, 22954, 9903, 6790, 23352, 7332, 51343, 10277, 143384, 5347, 9320, 267, 1642, 26091, 11060, 11065, 144699, 9616, 80196, 29116, …	4171	141	11756	1.49921	0.150355	0.00492531	0.0468295
GOTERM_BP_DIRECT	GO:0006457~protein folding	78	1.65219	2.45776e-05	4043, 10130, 9601, 7295, 10856, 3337, 5478, 2288, 10294, 3336, 79087, 23307, 4820, 23759, 10131, 56255, 5589, 3301, 10961, 11140, 80273, 60681, 30001, 22948, 23640, 10105, 10575, 10576, 7411, 10574, 55033, 7841, 7203, 11080, 9530, 1459, 9531, 3998, 23398, 3313, 5082, 16, 6950, 3312, 2783, 9360, 821, 2771, 51061, 5203, 4802, 6905, 3320, 23193, 22926, 1460, 9526, 9529, 6903, 7184, 134218, 169714, 8…	4171	148	11756	1.48543	0.1547	0.00493086	0.0483027
UP_KEYWORDS	Initiation factor	33	0.699004	3.44793e-05	1939, 10209, 83939, 8672, 9669, 10480, 9470, 8668, 1974, 8669, 27335, 1975, 8892, 1979, 8894, 8562, 1968, 51386, 8662, 1965, 8661, 8667, 3692, 8666, 8664, 10289, 1982, 1983, 1981, 6875, 27102, 7458, 3646	4583	51	13285	1.87567	0.0198335	0.000500696	0.0506871
GOTERM_CC_DIRECT	GO:0005813~centrosome	178	3.77039	3.57674e-05	8881, 79000, 84930, 805, 9342, 1108, 801, 79140, 1107, 8318, 10899, 10540, 6491, 9857, 9859, 4926, 23271, 55188, 6566, 6497, 4218, 79598, 56992, 8409, 675, 90799, 23503, 7283, 83903, 55755, 4190, 9738, 26005, 64326, 4830, 56928, 84333, 58490, 402, 10142, 23637, 1453, 1452, 9368, 5144, 7516, 5048, 348654, 27183, 22919, 6950, 1785, 163786, 57223, 8655, 9903, 7188, 2771, 55165, 51808, 1069, 5347, 37…	4343	398	12453	1.28239	0.039818	0.00169159	0.0574141
UP_KEYWORDS	Stress response	50	1.0591	3.57754e-05	10525, 7494, 6300, 22794, 3337, 3312, 5611, 3336, 1843, 6416, 3320, 1649, 1153, 10131, 7184, 57761, 4217, 3305, 10985, 3304, 10808, 5600, 22824, 10313, 5609, 23645, 84447, 51182, 6885, 25994, 3326, 3308, 51668, 3297, 130872, 3329, 5831, 11315, 10370, 26353, 29923, 6446, 8986, 5935, 871, 10598, 11080, 5295, 5296, 440275	4583	88	13285	1.64702	0.0205714	0.000506845	0.052592
GOTERM_BP_DIRECT	GO:0032508~DNA duplex unwinding	29	0.614277	3.72738e-05	10973, 1108, 10856, 1106, 1107, 51659, 8318, 1105, 80119, 641, 1663, 7520, 10111, 4172, 4174, 301, 9837, 9400, 8607, 1660, 25788, 9401, 57680, 546, 1654, 2547, 10146, 23064, 83990	4171	42	11756	1.94611	0.224993	0.00725593	0.073246
INTERPRO	IPR000953:Chromo domain/shadow	22	0.466003	3.81918e-05	10524, 9425, 79723, 6599, 84181, 1108, 8535, 6839, 84733, 10951, 1106, 1107, 1105, 80205, 10933, 23468, 57680, 23466, 6601, 55636, 124359, 11335	4344	29	12512	2.18505	0.163166	0.0195976	0.0721242
UP_SEQ_FEATURE	compositionally biased region:Gln-rich	66	1.39801	4.06246e-05	4302, 6721, 22976, 56252, 9968, 27333, 26122, 55588, 55809, 9698, 10615, 25792, 4929, 3192, 89797, 84074, 57492, 22848, 23215, 64746, 57496, 5411, 23269, 57215, 2802, 23318, 25836, 58508, 27327, 29072, 6449, 10142, 54439, 9909, 56946, 27086, 11100, 10523, 54472, 9025, 4800, 8289, 196528, 23112, 205717, 54870, 26057, 26058, 64599, 84726, 23387, 79832, 6760, 22828, 25957, 7159, 55731, 8085, 10743, …	4552	125	13191	1.53006	0.300835	0.0252381	0.0818866
GOTERM_BP_DIRECT	GO:0051436~negative regulation of ubiquitin-protein ligase activity involved in mitotic cell cycle	42	0.889642	4.08806e-05	5717, 8881, 5718, 5710, 9861, 5686, 5713, 5685, 5683, 983, 5716, 9491, 51343, 10197, 51529, 5708, 11065, 5709, 5706, 5707, 5691, 5704, 1017, 5705, 7316, 5702, 26271, 5695, 7314, 5701, 6233, 7311, 996, 5688, 7321, 5689, 7324, 9184, 51434, 51433, 891, 29882	4171	69	11756	1.71561	0.243874	0.00773513	0.0803309
UP_KEYWORDS	Activator	235	4.97776	4.34819e-05	3725, 55749, 7494, 4205, 2005, 29028, 221937, 57862, 22904, 10488, 4212, 400569, 65056, 6495, 602, 8409, 3091, 23, 3297, 7343, 54797, 10725, 6778, 440275, 4609, 51593, 4779, 9987, 4774, 8031, 55729, 4775, 84498, 2314, 359948, 1997, 23013, 253461, 22926, 4783, 1999, 4094, 4780, 9994, 23522, 328, 2308, 55870, 329, 2309, 6760, 23389, 2303, 284695, 2305, 80854, 339324, 10499, 10743, 55534, 23286, 771…	4583	551	13285	1.23631	0.0249471	0.000601332	0.0639176
GOTERM_MF_DIRECT	GO:0003676~nucleic acid binding	337	7.13832	4.37456e-05	170958, 170959, 23131, 7753, 8886, 140890, 144983, 23518, 10898, 25799, 197407, 57862, 55544, 1974, 25792, 22803, 7745, 11325, 8871, 7743, 54993, 80829, 7073, 84991, 170960, 7738, 126231, 403341, 9987, 51193, 8761, 16, 55922, 55218, 5612, 163227, 7626, 23013, 2971, 7629, 9879, 253461, 152485, 55661, 49854, 79830, 8427, 55734, 3735, 10212, 51385, 22907, 54877, 100101467, 10492, 339324, 55105, 7621…	4211	799	11857	1.18761	0.0890503	0.00619855	0.0757468
SMART	SM00298:CHROMO	22	0.466003	4.5298e-05	10524, 9425, 79723, 6599, 84181, 1108, 8535, 6839, 84733, 10951, 1106, 1107, 1105, 80205, 10933, 23468, 57680, 23466, 6601, 55636, 124359, 11335	2429	29	6919	2.16093	0.0319138	0.00646583	0.068497
GOTERM_BP_DIRECT	GO:1901796~regulation of signal transduction by p53 class mediator	64	1.35564	4.77747e-05	1108, 1107, 6874, 22974, 641, 10919, 11198, 7994, 5985, 6117, 116028, 26155, 5600, 204851, 83860, 4194, 5928, 672, 6883, 4193, 51230, 7314, 207, 7311, 79813, 9212, 6875, 472, 5932, 5931, 9156, 10524, 1459, 2033, 84126, 6794, 5457, 25946, 6790, 5565, 9219, 6908, 6749, 1460, 83695, 10111, 8445, 8851, 5300, 1017, 7156, 10419, 7316, 112858, 7159, 53615, 7157, 6233, 8805, 80010, 3065, 3066, 83990, 7862	4171	118	11756	1.52868	0.278693	0.00879062	0.0938718
UP_KEYWORDS	Zinc-finger	574	12.1584	4.79897e-05	80742, 8887, 330, 23650, 10898, 25799, 197407, 10616, 25792, 85463, 11097, 29128, 22803, 10713, 6093, 23503, 26009, 118987, 8028, 57215, 7337, 26001, 80829, 546, 149603, 84085, 11083, 5252, 84295, 7227, 51193, 27086, 2971, 58486, 90933, 79830, 23522, 8427, 101060200, 329, 284695, 51385, 100101467, 23528, 339324, 10743, 55388, 339318, 84874, 388569, 2960, 85451, 51283, 10600, 2967, 7597, 55900, 75…	4583	1464	13285	1.13653	0.0274975	0.000648224	0.0705417
GOTERM_BP_DIRECT	GO:0007049~cell cycle	97	2.05465	4.85088e-05	55749, 63922, 3875, 115098, 55183, 10298, 55544, 10296, 29128, 7803, 10713, 8872, 10807, 415116, 672, 55752, 56647, 80174, 5934, 402, 11334, 23637, 205564, 9221, 84612, 2771, 10015, 1841, 23326, 55665, 55660, 10801, 9770, 83742, 595, 9994, 90120, 79577, 2305, 2773, 4171, 27301, 85458, 60561, 2079, 150094, 9988, 23384, 10600, 2580, 55787, 6598, 6829, 10399, 382, 5586, 3054, 55914, 6839, 5928, 6737…	4171	195	11756	1.40203	0.282305	0.00869125	0.0953136
GOTERM_CC_DIRECT	GO:0005762~mitochondrial large ribosomal subunit	30	0.635459	4.88033e-05	6182, 122704, 9801, 387338, 54534, 130916, 9553, 28977, 124995, 91574, 29088, 51258, 64983, 128308, 64981, 63875, 55052, 3396, 51073, 64975, 51264, 26589, 64928, 64979, 65005, 57129, 54948, 219927, 29074, 84545	4343	45	12453	1.91158	0.0539331	0.00221522	0.0783318
INTERPRO	IPR023780:Chromo domain	18	0.381275	5.53073e-05	9425, 79723, 84181, 8535, 6839, 84733, 1108, 10951, 1106, 1107, 1105, 80205, 23468, 57680, 23466, 55636, 124359, 11335	4344	22	12512	2.3566	0.227374	0.0254662	0.104431
GOTERM_CC_DIRECT	GO:0035097~histone methyltransferase complex	18	0.381275	5.90577e-05	30827, 22976, 3720, 11108, 5929, 23067, 10419, 9739, 9757, 4297, 7403, 8085, 23468, 80335, 58508, 4221, 79447, 11091	4343	22	12453	2.34603	0.0648904	0.00257712	0.0947834
GOTERM_MF_DIRECT	GO:0051087~chaperone binding	43	0.910824	6.2331e-05	10525, 9530, 9531, 96459, 1191, 3280, 1075, 332, 3337, 1027, 5611, 10294, 3336, 5203, 23753, 4967, 6905, 10469, 9529, 6903, 267, 8266, 811, 6647, 3301, 10963, 10961, 329, 11140, 581, 80273, 84447, 476, 26278, 3309, 7157, 130872, 3329, 134266, 7248, 26520, 11080, 10598	4211	72	11857	1.68161	0.124442	0.00827146	0.107912
GOTERM_BP_DIRECT	GO:0006446~regulation of translational initiation	24	0.508367	6.44861e-05	10209, 51386, 8662, 8661, 8672, 9669, 8667, 8666, 10480, 8664, 1982, 10289, 1983, 1981, 8668, 8669, 1974, 27335, 1975, 22916, 7458, 8892, 3646, 440275	4171	33	11756	2.04982	0.356588	0.0112433	0.126688
GOTERM_BP_DIRECT	GO:0000086~G2/M transition of mitotic cell cycle	71	1.50392	6.49482e-05	84930, 805, 801, 8636, 332, 11190, 22974, 10540, 983, 10383, 84962, 4659, 9793, 10657, 5116, 55125, 4218, 8493, 7283, 55755, 9738, 7314, 7311, 9702, 8454, 9113, 5500, 7840, 10142, 5108, 1453, 1454, 219771, 5048, 8945, 22919, 1785, 79866, 23354, 5520, 6790, 8655, 3320, 5518, 1069, 5347, 10776, 8481, 2029, 10733, 79441, 9088, 1017, 2305, 7465, 7316, 1778, 6233, 3161, 994, 1022, 995, 1639, 203068, 8…	4171	135	11756	1.48233	0.358618	0.0110418	0.127595
GOTERM_CC_DIRECT	GO:0043209~myelin sheath	73	1.54628	7.0231e-05	5160, 22933, 382, 23176, 10383, 481, 26227, 1152, 506, 6647, 509, 10963, 7284, 4191, 2806, 4190, 476, 2752, 22948, 3309, 10376, 10576, 7345, 2664, 2665, 71, 5315, 7203, 4642, 7386, 7384, 5250, 760, 3313, 7415, 4735, 7416, 3312, 6950, 7417, 2783, 821, 10015, 3320, 3419, 7086, 5306, 5962, 60, 3945, 515, 9377, 2923, 6624, 5245, 1738, 5052, 498, 6233, 292, 3329, 4282, 7430, 4478, 2782, 523, 6389, 109…	4343	142	12453	1.47407	0.0766854	0.00295065	0.112706
GOTERM_MF_DIRECT	GO:0019904~protein domain specific binding	90	1.90638	7.68798e-05	9968, 2810, 805, 5781, 4204, 3148, 7027, 801, 11190, 3476, 7126, 5912, 9414, 10409, 5534, 2475, 3675, 59343, 1822, 23405, 9798, 8364, 6498, 3920, 6497, 8367, 2067, 1487, 2570, 23647, 476, 3309, 25978, 7444, 835, 409, 5590, 1656, 55327, 57661, 5501, 58506, 8826, 3916, 400, 4642, 23129, 11335, 4690, 55920, 8554, 10971, 5310, 5870, 7514, 8553, 5007, 27183, 7415, 81559, 7474, 8655, 5465, 23019, 6907,…	4211	180	11857	1.40786	0.151185	0.00959567	0.133084
UP_KEYWORDS	Biological rhythms	60	1.27092	7.69977e-05	9967, 10399, 6421, 1387, 3192, 26224, 9975, 9500, 4841, 5927, 6839, 3398, 56339, 1385, 1660, 4297, 7337, 7071, 3184, 5501, 9112, 1655, 5500, 23064, 5591, 10765, 23411, 402055, 11335, 25942, 79723, 1453, 2033, 8553, 1454, 5187, 2932, 8945, 8204, 5465, 4800, 3399, 4783, 9475, 8851, 10514, 7150, 7153, 10419, 6667, 7157, 10743, 10499, 85457, 8473, 8914, 468, 3065, 150094, 3066	4583	113	13285	1.53916	0.0437514	0.00101624	0.113159
GOTERM_BP_DIRECT	GO:0006334~nucleosome assembly	39	0.826096	7.93583e-05	55723, 81611, 3148, 3005, 9555, 3006, 8125, 10541, 3008, 25842, 8467, 144108, 23270, 6046, 7994, 7259, 6418, 8364, 4678, 51773, 4676, 8971, 8367, 6662, 23522, 126961, 4869, 4673, 64061, 3014, 4171, 3017, 1616, 3021, 546, 85236, 8358, 8356, 50809	4171	64	11756	1.71753	0.418808	0.0131487	0.155884
GOTERM_CC_DIRECT	GO:0015935~small ribosomal subunit	20	0.423639	7.93701e-05	6217, 51116, 10399, 6230, 6209, 6188, 6233, 6187, 6229, 6203, 6228, 6227, 2197, 6224, 6222, 55272, 6191, 3921, 6193, 6194	4343	26	12453	2.20567	0.0862224	0.00321511	0.127364
INTERPRO	IPR016197:Chromo domain-like	21	0.444821	8.07024e-05	10524, 9425, 79723, 84181, 1108, 8535, 6839, 84733, 10951, 1106, 51742, 1107, 1105, 80205, 10933, 23468, 57680, 23466, 55636, 124359, 11335	4344	28	12512	2.16022	0.31368	0.0336403	0.152347
GOTERM_BP_DIRECT	GO:0043066~negative regulation of apoptotic process	157	3.32557	8.08496e-05	7494, 8531, 8535, 10795, 8887, 332, 3875, 330, 5538, 9928, 6491, 3480, 2950, 55023, 602, 8870, 415116, 4194, 55031, 4193, 207, 5036, 1718, 3491, 7178, 7076, 8539, 11331, 23064, 4609, 23636, 8554, 5618, 2316, 3313, 51499, 5611, 1072, 7189, 92140, 1843, 7422, 51804, 5347, 9021, 103, 7184, 10114, 1642, 4091, 2395, 7110, 64083, 598, 2308, 329, 323, 7428, 7316, 25994, 10210, 3329, 4170, 7320, 25816, 1…	4171	344	11756	1.28635	0.424705	0.0130774	0.158811
GOTERM_BP_DIRECT	GO:0031145~anaphase-promoting complex-dependent catabolic process	44	0.932006	8.73199e-05	5717, 8881, 5718, 5710, 9861, 5686, 5713, 5685, 5683, 983, 6790, 5716, 9491, 51343, 10197, 5347, 51529, 5708, 11065, 79791, 5709, 5706, 5707, 5691, 5704, 5705, 7316, 5702, 5695, 7314, 5701, 6233, 7311, 996, 5688, 7321, 5689, 9212, 7324, 9184, 51434, 51433, 29882, 891	4171	75	11756	1.65353	0.449605	0.0137905	0.17151
GOTERM_BP_DIRECT	GO:0006338~chromatin remodeling	44	0.932006	8.73199e-05	6595, 79723, 6599, 83444, 6829, 6598, 6597, 114803, 22890, 10856, 6827, 9557, 1105, 93624, 2648, 8467, 6830, 11176, 11177, 7270, 8289, 51773, 6662, 57492, 5928, 7150, 11164, 8607, 55193, 10933, 1616, 7913, 23476, 6304, 546, 3065, 3066, 6601, 2186, 23314, 55636, 9643, 4609, 11335	4171	75	11756	1.65353	0.449605	0.0137905	0.17151
GOTERM_CC_DIRECT	GO:0031965~nuclear membrane	98	2.07583	9.01069e-05	79647, 55787, 2644, 1192, 1104, 51530, 1861, 10204, 4001, 9859, 80314, 10390, 5987, 59343, 84629, 11097, 9972, 29956, 57761, 64782, 23225, 55914, 64783, 9818, 30000, 51230, 25, 63931, 23165, 9821, 9589, 84950, 7779, 7175, 29803, 9538, 10762, 55706, 8888, 54881, 23636, 9801, 5108, 23399, 7514, 1956, 5048, 5663, 3601, 114882, 3843, 3842, 55219, 91012, 9123, 92140, 25909, 51343, 2597, 113878, 64960,…	4343	203	12453	1.38425	0.0973009	0.00352364	0.144581
GOTERM_BP_DIRECT	GO:0016569~covalent chromatin modification	57	1.20737	9.07165e-05	7290, 6599, 3720, 6598, 6597, 8535, 84733, 1106, 9555, 29855, 1105, 8467, 10927, 80312, 23466, 51460, 51773, 10155, 57492, 9611, 84181, 2908, 64061, 63035, 55193, 1616, 10664, 23476, 546, 5934, 54799, 6601, 23314, 11335, 55723, 5252, 65980, 81611, 56946, 79366, 57050, 10363, 1786, 25842, 6046, 8289, 26147, 196528, 9324, 22823, 80205, 57680, 7913, 148479, 2186, 55636, 27000	4171	104	11756	1.54476	0.462242	0.0139999	0.178176
GOTERM_MF_DIRECT	GO:0002039~p53 binding	37	0.783732	9.18764e-05	6598, 2033, 55159, 1938, 6597, 2932, 6794, 51499, 23650, 25946, 10919, 641, 25898, 9100, 1387, 10197, 56254, 7874, 754, 83860, 80196, 23567, 4193, 112858, 7159, 80854, 7157, 7158, 3329, 79813, 1616, 57680, 8805, 23476, 23028, 23411, 3064	4211	60	11857	1.73636	0.177897	0.0108238	0.159025
GOTERM_CC_DIRECT	GO:0042645~mitochondrial nucleoid	28	0.593095	9.45359e-05	56652, 1373, 60493, 3313, 60528, 7416, 7417, 37, 54931, 55379, 3030, 1629, 7019, 6472, 5442, 26073, 5428, 506, 55794, 2926, 7284, 22907, 22868, 7978, 292, 79736, 10128, 6742	4343	42	12453	1.91158	0.101832	0.00357353	0.151683
GOTERM_BP_DIRECT	GO:0045892~negative regulation of transcription, DNA-templated	186	3.93984	9.92705e-05	3725, 3148, 4204, 3720, 3280, 8535, 332, 23462, 6421, 221937, 10409, 2295, 23468, 22904, 10614, 6418, 81628, 7541, 51773, 10155, 605, 54815, 57761, 602, 1487, 7546, 3204, 55031, 672, 4193, 166, 112939, 5036, 79813, 6879, 1616, 10472, 7071, 7342, 25836, 6015, 10009, 4221, 2023, 6601, 11331, 11335, 10524, 54880, 58487, 51497, 8553, 8861, 55729, 51193, 8945, 27086, 3312, 81559, 55922, 10522, 7189, 6…	4171	418	11756	1.25417	0.492798	0.0149722	0.194962
GOTERM_BP_DIRECT	GO:0036498~IRE1-mediated unfolded protein response	33	0.699004	0.000111009	10525, 7494, 10130, 10897, 9570, 22872, 4189, 6464, 10952, 27230, 5611, 37, 118, 1663, 56005, 9797, 10113, 6745, 30827, 11231, 58477, 55738, 64061, 84447, 7466, 3309, 1639, 7094, 7095, 55033, 3068, 29927, 2137	4171	52	11756	1.78867	0.531922	0.0163672	0.217991
UP_KEYWORDS	ATP-binding	457	9.68015	0.000122706	146057, 5230, 79707, 8886, 55236, 63922, 29028, 3480, 8737, 2011, 2956, 537, 6093, 204, 6782, 204851, 55226, 6885, 149420, 25788, 207, 208, 10097, 10721, 546, 7203, 7204, 8243, 215, 7327, 7326, 27183, 25778, 150465, 10730, 1841, 7332, 22928, 84197, 5347, 8444, 8445, 10733, 1445, 7317, 22907, 51182, 7319, 7320, 6897, 7321, 523, 908, 7324, 10606, 7322, 7323, 10749, 617, 5128, 6595, 5127, 5917, 6597…	4583	1155	13285	1.14695	0.0688142	0.00158311	0.180277
UP_SEQ_FEATURE	compositionally biased region:Poly-Pro	149	3.15611	0.000127509	26168, 1108, 10291, 25962, 25798, 6874, 1107, 23518, 10992, 6421, 2296, 54499, 1822, 10922, 1387, 10487, 64689, 10137, 4037, 607, 51564, 678, 10140, 10163, 79791, 3206, 4216, 153562, 23645, 8936, 25, 4298, 4297, 27, 5546, 4299, 26000, 10915, 23476, 9741, 54922, 84687, 5934, 84996, 6607, 10525, 9880, 22853, 8030, 826, 4775, 22794, 10521, 22859, 56888, 5802, 6942, 22926, 3221, 51293, 5962, 4091, 83…	4552	335	13191	1.28889	0.674796	0.0721515	0.256806
INTERPRO	IPR013083:Zinc finger, RING/FYVE/PHD-type	166	3.5162	0.000135785	4302, 10206, 90850, 1108, 57674, 1107, 55182, 79142, 10299, 10616, 27339, 23469, 1387, 84678, 9148, 29128, 57178, 64219, 23077, 51773, 10713, 10155, 130507, 25820, 79596, 84133, 10336, 23503, 4194, 83860, 672, 8028, 81847, 4193, 51230, 200576, 54620, 22888, 4297, 26001, 9867, 64326, 8193, 55658, 57661, 546, 6015, 84333, 149603, 64324, 5930, 11083, 5252, 84295, 10273, 81559, 22992, 10425, 7189, 71…	4344	377	12512	1.26825	0.469187	0.0514101	0.256203
UP_SEQ_FEATURE	short sequence motif:DEAH box	26	0.550731	0.000151571	79665, 55760, 170506, 84181, 1108, 1106, 113510, 9400, 1107, 22907, 9557, 1105, 9401, 57697, 80205, 641, 8467, 8458, 57680, 1665, 64848, 375748, 1659, 83990, 9785, 55636	4552	39	13191	1.9319	0.736919	0.0800683	0.305197
KEGG_PATHWAY	hsa03008:Ribosome biogenesis in eukaryotes	43	0.910824	0.000155672	65083, 1459, 2091, 54552, 10248, 7514, 10528, 10171, 29102, 92856, 54433, 23195, 9790, 54913, 5822, 29107, 55272, 55505, 22803, 1460, 10775, 6949, 57455, 84135, 51367, 29889, 55127, 10885, 55226, 166378, 1736, 23160, 28987, 3692, 5901, 51119, 23560, 10436, 51602, 9724, 10557, 79631, 26354	1804	71	4809	1.61446	0.0441444	0.00898905	0.206751
UP_SEQ_FEATURE	short sequence motif:DEAD box	21	0.444821	0.000159415	54606, 26781, 11269, 8886, 55308, 11218, 57696, 10521, 1662, 9775, 1656, 1974, 9879, 1654, 57062, 1655, 83479, 79039, 55661, 11325, 9416	4552	29	13191	2.09844	0.754485	0.0792913	0.320966
UP_SEQ_FEATURE	zinc finger region:PHD-type 2	21	0.444821	0.000159415	22823, 4302, 5252, 23522, 5927, 1108, 1107, 8028, 7468, 9757, 54904, 4297, 8085, 8193, 58508, 7994, 2186, 26147, 9682, 64324, 10765	4552	29	13191	2.09844	0.754485	0.0792913	0.320966
UP_SEQ_FEATURE	compositionally biased region:Poly-Lys	86	1.82165	0.000164792	7290, 6597, 8886, 1108, 9510, 5994, 1107, 284611, 27332, 10992, 23207, 25929, 9748, 54665, 23613, 54856, 51729, 8669, 7994, 27336, 23076, 8502, 89797, 171023, 6731, 85014, 400566, 79657, 84181, 672, 64645, 153562, 55892, 25, 285761, 9295, 9702, 4836, 400506, 10914, 5496, 546, 57062, 1659, 85437, 10579, 10765, 4086, 23060, 65108, 3609, 57703, 9669, 92140, 5514, 6046, 22926, 5422, 4090, 10467, 7270…	4552	178	13191	1.40008	0.765845	0.0774873	0.331775
GOTERM_BP_DIRECT	GO:0070126~mitochondrial translational termination	46	0.97437	0.000167028	122704, 6182, 9801, 51650, 51021, 54534, 51081, 9553, 28977, 55168, 124995, 91574, 64960, 51258, 29088, 64983, 128308, 118487, 64981, 63875, 54998, 55052, 10884, 64432, 65993, 51649, 3396, 64949, 63931, 51073, 64975, 54460, 26589, 51264, 64928, 64976, 64979, 65005, 57129, 54948, 219927, 29074, 23107, 84545, 84311, 55037	4171	81	11756	1.60063	0.680894	0.0240099	0.327826
GOTERM_MF_DIRECT	GO:0003697~single-stranded DNA binding	46	0.97437	0.000171539	8880, 56652, 8531, 3148, 9987, 3146, 7516, 2072, 8318, 5457, 641, 1663, 51729, 10923, 5887, 6117, 80169, 5886, 3190, 4904, 170463, 4173, 2067, 4175, 675, 301, 4176, 55775, 5093, 55247, 4436, 7508, 51567, 3329, 5813, 11315, 23168, 55388, 10128, 5814, 7247, 4830, 79035, 5433, 6742, 7555	4211	81	11857	1.59905	0.306326	0.0190661	0.296716
UP_KEYWORDS	Nucleotide-binding	573	12.1373	0.000176499	146057, 10890, 5230, 79707, 84273, 8886, 55236, 63922, 159, 29028, 3480, 8737, 2011, 2956, 537, 6093, 204, 6782, 204851, 55226, 6885, 149420, 25788, 207, 208, 3491, 10721, 10097, 546, 85476, 400, 402, 7203, 7204, 8243, 215, 7327, 27183, 7326, 25778, 150465, 10730, 1841, 7332, 22928, 84197, 5347, 8444, 58480, 10733, 8445, 1445, 58477, 7317, 22907, 51182, 7319, 7320, 6897, 7321, 523, 908, 7324, 610…	4583	1477	13285	1.12457	0.0974714	0.00222697	0.259214
INTERPRO	IPR003616:Post-SET domain	14	0.296547	0.000184031	79723, 55870, 6839, 23067, 7468, 9757, 9739, 54904, 4297, 8085, 9869, 58508, 29072, 64324	4344	16	12512	2.52026	0.57616	0.0638979	0.347085
KEGG_PATHWAY	hsa03015:mRNA surveillance pathway	47	0.995552	0.000196288	11052, 79869, 1477, 26019, 22794, 2935, 55844, 8761, 84305, 10898, 5520, 10978, 29101, 23293, 80335, 29107, 9775, 5515, 5518, 55339, 132430, 2107, 53918, 9939, 53981, 26528, 51585, 5411, 10284, 22985, 5525, 10767, 10914, 5529, 23283, 5528, 22916, 5527, 5501, 5499, 5976, 5500, 10250, 23049, 7919, 26986, 23381	1804	80	4809	1.56612	0.0553391	0.00944333	0.26063
GOTERM_CC_DIRECT	GO:0005743~mitochondrial inner membrane	170	3.60093	0.000196638	29796, 5166, 26164, 4697, 84273, 27069, 55186, 7298, 51629, 51081, 9551, 37, 9553, 5018, 1727, 124995, 10131, 128308, 118487, 60386, 56993, 54998, 204, 55052, 7284, 4191, 1327, 63931, 4833, 23456, 64928, 5832, 1376, 4695, 92609, 4696, 11331, 4694, 84545, 10165, 23787, 55037, 6182, 9801, 5250, 81034, 23530, 51021, 54534, 7416, 7417, 26284, 373156, 6188, 27089, 513, 10730, 55168, 3030, 51295, 9167,…	4343	388	12453	1.25632	0.200207	0.00718063	0.315263
GOTERM_MF_DIRECT	GO:0016874~ligase activity	113	2.39356	0.000212585	10206, 8535, 57674, 330, 55182, 10299, 10616, 27339, 29128, 9148, 64219, 23077, 23304, 10155, 130507, 25820, 57162, 84133, 672, 4193, 81847, 22888, 7337, 26001, 80829, 64326, 9867, 55658, 7345, 31, 6015, 149603, 5930, 25831, 8554, 57154, 26145, 10273, 8945, 81559, 10425, 56888, 7189, 55167, 7187, 7186, 10277, 23295, 9025, 54476, 221687, 90933, 81603, 23321, 9810, 329, 51588, 10210, 10075, 92979, …	4211	240	11857	1.32574	0.364459	0.0224091	0.367591
GOTERM_MF_DIRECT	GO:0061630~ubiquitin protein ligase activity	82	1.73692	0.000213325	9968, 55905, 55182, 9412, 84246, 27339, 25897, 63893, 29128, 9148, 64219, 400569, 23759, 9040, 23304, 130507, 25820, 51465, 51529, 51132, 57162, 9443, 84133, 11236, 4194, 55298, 81847, 84447, 4193, 7337, 10001, 64326, 9867, 54926, 55658, 8454, 8453, 8451, 54797, 8450, 29882, 5930, 84085, 64750, 57154, 10273, 7327, 7326, 868, 8945, 81559, 10425, 22954, 7189, 55167, 143384, 23295, 7336, 54476, 2908…	4211	165	11857	1.39933	0.365462	0.021427	0.368869
UP_SEQ_FEATURE	short sequence motif:Nuclear localization signal	131	2.77484	0.000214443	26168, 7536, 22976, 3720, 84733, 9552, 125950, 59343, 7541, 6493, 9444, 4194, 8545, 3097, 3091, 4193, 25, 27, 10915, 1616, 4605, 1810, 10009, 6015, 10147, 11083, 8554, 84295, 170506, 55729, 4775, 2072, 10270, 1786, 9221, 23633, 55922, 10522, 1072, 51808, 1500, 6942, 79026, 2175, 1847, 55661, 51514, 7112, 1465, 3836, 8563, 5424, 699, 3839, 2309, 79577, 3838, 1063, 10318, 10743, 10933, 85456, 4810,…	4552	292	13191	1.30006	0.848812	0.0946496	0.431532
GOTERM_MF_DIRECT	GO:0019899~enzyme binding	134	2.83838	0.000219354	3725, 54808, 54517, 8535, 26262, 332, 9555, 54908, 488, 10299, 3482, 51631, 3920, 5447, 1893, 4194, 672, 3091, 9546, 4193, 1385, 5034, 7289, 207, 22985, 5037, 409, 1718, 1616, 2, 11338, 8312, 3916, 875, 81619, 7204, 11335, 8554, 84295, 215, 7515, 5144, 8861, 22794, 10273, 3312, 1785, 6895, 6188, 6187, 7040, 7186, 7332, 10277, 23326, 595, 694, 7529, 3837, 64083, 5424, 5245, 4436, 7428, 3014, 4171,…	4211	292	11857	1.29215	0.373567	0.0210353	0.379274
GOTERM_BP_DIRECT	GO:0000387~spliceosomal snRNP assembly	20	0.423639	0.00023332	79760, 50628, 6637, 6628, 79833, 6636, 6633, 6634, 10419, 11218, 96764, 9092, 11171, 25929, 25804, 79084, 6632, 6631, 6607, 1207	4171	27	11756	2.08778	0.797219	0.0326958	0.457655
INTERPRO	IPR016024:Armadillo-type fold	140	2.96547	0.000242992	54808, 23511, 25962, 55183, 8672, 10480, 1729, 63916, 60626, 64318, 27335, 55188, 253260, 10153, 51236, 26155, 54892, 79699, 23451, 9875, 54919, 23640, 1982, 1983, 8729, 163, 1981, 440590, 164, 25836, 472, 8539, 23066, 23063, 8295, 79798, 25831, 54881, 29978, 10527, 10526, 1434, 7514, 3843, 8943, 3842, 57223, 23633, 6894, 1500, 1130, 285527, 8239, 23116, 84909, 23392, 196528, 10735, 55737, 10514,…	4344	314	12512	1.28421	0.67808	0.0777702	0.458045
GOTERM_BP_DIRECT	GO:0030433~ER-associated ubiquitin-dependent protein catabolic process	36	0.76255	0.000244939	29978, 10206, 4189, 11253, 10952, 7844, 80267, 7327, 7415, 6400, 10956, 51009, 10299, 23197, 10613, 80020, 10277, 55666, 23190, 201595, 267, 23392, 51465, 7184, 550, 5706, 5704, 55298, 5705, 5702, 84447, 7466, 3309, 11160, 5701, 57003	4171	60	11756	1.69111	0.81271	0.0336079	0.480393
GOTERM_CC_DIRECT	GO:0000784~nuclear chromosome, telomeric region	55	1.16501	0.000250802	10951, 9555, 983, 23468, 6117, 8364, 8367, 2067, 675, 55226, 5501, 546, 472, 5500, 5976, 5499, 55791, 4221, 23028, 5591, 8358, 6741, 11335, 8356, 2072, 54433, 80119, 5514, 80335, 7520, 10111, 80169, 8520, 5111, 1642, 4173, 4172, 4175, 9937, 4174, 4176, 8563, 5424, 328, 79577, 4436, 4171, 5813, 3021, 2237, 79035, 5431, 2547, 64858, 142	4343	104	12453	1.5164	0.247946	0.00886506	0.401938
KEGG_PATHWAY	hsa04120:Ubiquitin mediated proteolysis	69	1.46155	0.000258721	8881, 55236, 330, 55585, 27339, 25898, 63893, 23759, 9040, 51465, 51529, 9690, 10055, 10054, 23221, 672, 84447, 4193, 22888, 55958, 9063, 7337, 64326, 54926, 8454, 8453, 89910, 8451, 51434, 8450, 51433, 29882, 8554, 64750, 57154, 10273, 7327, 7326, 8945, 868, 22954, 7189, 7332, 51343, 10277, 23295, 1643, 9320, 9021, 1642, 26091, 11060, 11065, 9616, 329, 7428, 7317, 51588, 7319, 7320, 996, 10075, …	1804	129	4809	1.42586	0.0722926	0.0106626	0.343396
UP_SEQ_FEATURE	compositionally biased region:Gly-rich	84	1.77928	0.000258828	4302, 8880, 57721, 253982, 55689, 8570, 144983, 55585, 79684, 220988, 3191, 1153, 64848, 3192, 10137, 9972, 23077, 25820, 171023, 11325, 56257, 57492, 3858, 22848, 90957, 3301, 23211, 23640, 10370, 3189, 3182, 80139, 3184, 89887, 6015, 84858, 81894, 10146, 5935, 3181, 11047, 10762, 3607, 25940, 9908, 170506, 9987, 3213, 1954, 65986, 23358, 155061, 11100, 5457, 55252, 5514, 23294, 57690, 10949, 79…	4552	175	13191	1.39097	0.897747	0.107756	0.520628
GOTERM_MF_DIRECT	GO:0003713~transcription coactivator activity	104	2.20292	0.00026219	3725, 55749, 6874, 2648, 3726, 10691, 1387, 10923, 2957, 2958, 7543, 171023, 9443, 9441, 672, 9913, 6883, 7337, 10915, 10001, 6879, 6875, 6601, 79595, 8554, 10524, 114803, 8031, 10521, 92140, 7332, 4802, 10011, 6942, 22926, 23326, 148398, 29777, 1999, 7528, 328, 329, 27097, 10499, 2962, 55534, 23286, 51282, 10600, 6595, 9967, 57826, 9969, 9968, 7025, 6599, 6598, 7027, 6597, 55904, 5994, 9412, 702…	4211	219	11857	1.33715	0.428255	0.024014	0.453182
GOTERM_MF_DIRECT	GO:0003684~damaged DNA binding	35	0.741368	0.000268709	3148, 7515, 2033, 3146, 2072, 6188, 1387, 5887, 6117, 7520, 1643, 2956, 5886, 5111, 1642, 2067, 5429, 9937, 5424, 328, 672, 55247, 4436, 3014, 7508, 7157, 11284, 2237, 51455, 10721, 8450, 2547, 64858, 5932, 2967	4211	58	11857	1.69914	0.436149	0.0235908	0.464426
UP_KEYWORDS	Endoplasmic reticulum	343	7.26541	0.000274342	7494, 5738, 10206, 10897, 10890, 50999, 284098, 1191, 79709, 51371, 79803, 8125, 79087, 55379, 54499, 10613, 1727, 10488, 4217, 6780, 7485, 6782, 55851, 23645, 8733, 23507, 23509, 1717, 1718, 9867, 7345, 1984, 55650, 56926, 4779, 23399, 9986, 1595, 114882, 57222, 5352, 5611, 5351, 23011, 821, 92140, 253558, 84197, 9197, 22926, 6748, 55666, 6747, 6746, 23392, 201595, 7184, 6745, 811, 813, 375056, …	4583	854	13285	1.16425	0.147357	0.00338605	0.40264
GOTERM_CC_DIRECT	GO:0000790~nuclear chromatin	80	1.69456	0.000282683	6595, 7290, 8969, 6599, 3148, 6598, 4205, 6597, 1108, 3005, 6874, 9555, 1104, 150678, 3726, 2648, 10919, 1051, 1663, 6929, 1387, 146956, 94239, 29128, 2956, 3190, 171023, 9611, 5928, 1385, 10370, 54962, 3183, 80174, 4221, 4088, 9960, 9314, 23028, 4089, 6601, 6778, 23126, 23411, 6934, 55723, 64710, 8338, 7227, 8861, 113130, 5457, 25946, 8204, 25842, 9219, 6908, 84265, 8289, 3659, 4678, 10111, 8520…	4343	164	12453	1.39872	0.274702	0.00968531	0.452922
GOTERM_MF_DIRECT	GO:0019901~protein kinase binding	149	3.15611	0.000287002	7494, 805, 4205, 801, 9555, 22974, 10899, 9928, 26608, 25793, 253260, 6497, 10131, 6560, 57761, 4217, 51564, 4218, 8874, 11140, 55755, 3091, 23645, 476, 51094, 3297, 5037, 1616, 4830, 6223, 80174, 8312, 6222, 9055, 55920, 81610, 7416, 1915, 1785, 5611, 6188, 7189, 7187, 7186, 9776, 1500, 1994, 10949, 5347, 5422, 27013, 10112, 102, 5829, 1845, 595, 219931, 8851, 9618, 598, 2309, 25998, 4436, 9564,…	4211	331	11857	1.2675	0.457721	0.0241818	0.495968
UP_SEQ_FEATURE	repeat:HEAT 7	18	0.381275	0.000305819	10985, 26953, 3837, 7514, 64151, 23451, 30000, 3842, 2475, 54919, 5518, 23066, 9989, 9670, 23392, 23332, 9793, 55832	4552	24	13191	2.17339	0.932415	0.120414	0.614873
GOTERM_MF_DIRECT	GO:0003743~translation initiation factor activity	33	0.699004	0.000307513	1939, 10209, 83939, 8672, 9669, 10480, 9470, 8668, 1974, 8669, 27335, 1975, 8892, 1979, 8894, 8562, 1968, 51386, 8662, 1965, 8661, 8667, 3692, 8666, 8664, 10289, 1982, 1983, 1981, 6875, 27102, 7458, 3646	4211	54	11857	1.72072	0.480931	0.0249046	0.531325
INTERPRO	IPR000629:RNA helicase, ATP-dependent, DEAD-box, conserved site	17	0.360093	0.000309105	8886, 11218, 57696, 10521, 1662, 9775, 1656, 1974, 9879, 1654, 1069, 57062, 1655, 79039, 55661, 11325, 9416	4344	22	12512	2.22568	0.763519	0.0916504	0.582325
KEGG_PATHWAY	hsa05016:Huntington's disease	81	1.71574	0.000326742	1351, 1350, 5434, 29796, 5435, 4697, 5438, 5332, 6874, 10540, 10488, 1387, 6391, 7019, 1349, 1347, 5441, 506, 6647, 509, 581, 1327, 1385, 10105, 5978, 163, 6875, 4695, 4696, 1337, 4694, 7388, 7386, 7384, 25942, 2033, 7416, 4702, 7417, 4700, 10975, 7419, 4731, 27089, 513, 6908, 9167, 126328, 518, 517, 1173, 515, 9377, 4728, 4716, 4723, 4713, 4726, 4725, 4715, 440567, 6667, 7157, 498, 4710, 292, 23…	1804	157	4809	1.37532	0.0904185	0.0117764	0.433497
GOTERM_CC_DIRECT	GO:0033290~eukaryotic 48S preinitiation complex	12	0.254183	0.000332596	8668, 8669, 27335, 51386, 8662, 8661, 1965, 8667, 8666, 3646, 10480, 8664	4343	13	12453	2.64681	0.314695	0.0110529	0.532694
UP_KEYWORDS	Centromere	63	1.33446	0.00033724	92822, 284058, 332, 54908, 387103, 23468, 10615, 5885, 9793, 79003, 3619, 283489, 11243, 6839, 25936, 23219, 79980, 1616, 9212, 10664, 7175, 5501, 55320, 201254, 8243, 55920, 11130, 84295, 79723, 1452, 4735, 91687, 348235, 25909, 90417, 55166, 5515, 348995, 9126, 5518, 5347, 55355, 84516, 10735, 9770, 55143, 5905, 699, 79172, 64105, 1063, 1062, 7158, 57082, 5525, 2491, 91272, 7756, 1059, 5527, 91…	4583	125	13285	1.46097	0.177963	0.00407438	0.494741
GOTERM_BP_DIRECT	GO:0006511~ubiquitin-dependent protein catabolic process	74	1.56746	0.000345428	7494, 23032, 8533, 55236, 57674, 26263, 51377, 5685, 5683, 9491, 9100, 25793, 55230, 56254, 130507, 25820, 7398, 54850, 51132, 9958, 84133, 5709, 55031, 5706, 84640, 5701, 7337, 5688, 7345, 8454, 8453, 8451, 9960, 8450, 11047, 5717, 64750, 4738, 10273, 7327, 7326, 8945, 7415, 5710, 23358, 10425, 54472, 7332, 10277, 9025, 84196, 8239, 1540, 23326, 55666, 267, 7874, 9810, 51514, 29761, 11065, 26133…	4171	148	11756	1.40925	0.90581	0.04615	0.676845
SMART	SM00508:PostSET	12	0.254183	0.000352935	79723, 58508, 6839, 23067, 29072, 7468, 9739, 9757, 64324, 54904, 4297, 8085	2429	13	6919	2.62938	0.223335	0.0412494	0.532528
UP_SEQ_FEATURE	repeat:HEAT 9	13	0.275365	0.000408331	10985, 7514, 64151, 23451, 30000, 54919, 5518, 23066, 9670, 9989, 23392, 9793, 55832	4552	15	13191	2.51147	0.972614	0.150861	0.820177
UP_SEQ_FEATURE	repeat:HEAT 10	13	0.275365	0.000408331	10985, 7514, 64151, 23451, 30000, 54919, 5518, 23066, 9670, 9989, 23392, 9793, 55832	4552	15	13191	2.51147	0.972614	0.150861	0.820177
GOTERM_BP_DIRECT	GO:0032436~positive regulation of proteasomal ubiquitin-dependent protein catabolic process	34	0.720186	0.000442764	1601, 8554, 55905, 1453, 1452, 1191, 1454, 2932, 10273, 26263, 5663, 7415, 22933, 10399, 10221, 10425, 6790, 5716, 25898, 25897, 7336, 5347, 6613, 25820, 9655, 57761, 154214, 4193, 1855, 207, 122809, 23640, 10769, 64326	4171	57	11756	1.68122	0.951602	0.0576497	0.866783
GOTERM_BP_DIRECT	GO:0010501~RNA secondary structure unwinding	25	0.529549	0.000459315	54606, 170506, 55794, 11269, 8886, 55308, 10212, 11218, 57696, 10521, 1662, 9775, 1656, 9879, 1974, 57062, 1654, 1655, 83479, 9188, 79039, 7919, 55661, 11325, 9416	4171	38	11756	1.85428	0.956783	0.058625	0.899045
UP_SEQ_FEATURE	zinc finger region:PHD-type 3	10	0.21182	0.000475328	55632, 58508, 5927, 7468, 9757, 64324, 54904, 10765, 4297, 8085	4552	10	13191	2.89785	0.984826	0.166477	0.954134
GOTERM_MF_DIRECT	GO:0018024~histone-lysine N-methyltransferase activity	24	0.508367	0.000481388	79723, 63976, 2122, 6839, 55904, 5929, 23067, 7468, 84444, 7799, 9757, 9739, 80854, 54904, 4297, 10919, 8085, 79813, 9869, 58508, 4221, 29072, 64324, 11091	4211	36	11857	1.87715	0.641765	0.0373072	0.830568
GOTERM_BP_DIRECT	GO:0006342~chromatin silencing	20	0.423639	0.000484734	8969, 8338, 4204, 9555, 22933, 3014, 3015, 8085, 10933, 6830, 92815, 57597, 84629, 94239, 8336, 8334, 23304, 9643, 23411, 8330	4171	28	11756	2.01322	0.963681	0.0606385	0.948575
GOTERM_BP_DIRECT	GO:0070911~global genome nucleotide-excision repair	22	0.466003	0.00049048	2067, 2072, 7316, 9557, 404672, 7314, 7508, 6233, 7311, 54778, 1069, 7336, 8451, 5887, 6612, 8450, 1643, 6613, 2968, 1642, 142, 2967	4171	32	11756	1.93772	0.965081	0.0602341	0.959767
GOTERM_MF_DIRECT	GO:0008536~Ran GTPase binding	21	0.444821	0.000498523	10048, 23214, 5905, 10527, 10526, 1434, 3837, 7514, 332, 3843, 30000, 3842, 10204, 5902, 5903, 29107, 29098, 9670, 55705, 10762, 11260	4211	30	11857	1.971	0.654622	0.0372567	0.860013
GOTERM_BP_DIRECT	GO:0034976~response to endoplasmic reticulum stress	37	0.783732	0.00053115	10525, 7494, 10130, 9601, 8720, 1938, 10956, 488, 55161, 1051, 51061, 7186, 10277, 8795, 10488, 1649, 56255, 7184, 57761, 65992, 4217, 2923, 23645, 1965, 7466, 25, 5034, 30001, 91304, 79876, 81542, 23435, 468, 5295, 51506, 5296, 7057	4171	64	11756	1.62945	0.973562	0.0639197	1.03896
GOTERM_BP_DIRECT	GO:0042274~ribosomal small subunit biogenesis	13	0.275365	0.000547391	10436, 6229, 88745, 6201, 84946, 64434, 6223, 55226, 6217, 6838, 6209, 6194, 8602	4171	15	11756	2.44271	0.976343	0.0646726	1.07056
UP_KEYWORDS	rRNA processing	45	0.953188	0.000548725	117246, 2091, 387338, 79707, 92345, 11103, 25926, 90459, 130916, 118460, 115939, 23481, 92856, 54433, 54512, 9775, 51729, 55272, 23016, 55505, 23404, 22894, 54853, 55661, 54606, 8568, 84135, 10412, 55127, 55226, 6839, 1736, 22984, 5036, 8602, 10436, 88745, 80135, 25879, 55035, 9188, 29960, 55636, 23411, 4839	4583	84	13285	1.55291	0.273049	0.00648696	0.803829
UP_KEYWORDS	Proteasome	30	0.635459	0.000554145	5717, 5718, 5710, 9861, 5686, 5713, 51377, 5685, 5683, 9491, 10197, 5887, 5886, 23392, 9690, 5708, 5709, 5706, 5707, 5704, 5691, 5705, 5702, 7979, 5695, 5701, 7337, 5688, 5689, 11047	4583	50	13285	1.73925	0.275336	0.00642026	0.811739
UP_SEQ_FEATURE	repeat:HEAT 5	23	0.487185	0.000563969	10985, 26953, 3837, 7514, 64151, 23451, 3843, 30000, 8672, 3842, 54919, 2475, 25836, 5518, 23066, 23116, 9989, 9670, 23392, 23332, 9793, 3064, 55832	4552	35	13191	1.9043	0.993053	0.187028	1.13111
UP_SEQ_FEATURE	repeat:HEAT 8	15	0.317729	0.000564996	10985, 3837, 7514, 64151, 23451, 30000, 3842, 54919, 5518, 23066, 9989, 9670, 23392, 9793, 55832	4552	19	13191	2.28777	0.993115	0.180563	1.13315
BIOCARTA	h_ranMSPathway:Role of Ran in mitotic spindle regulation	11	0.233001	0.000578853	5905, 56992, 4926, 3837, 3838, 1104, 22974, 5901, 8420, 5902, 6790	520	11	1324	2.54615	0.151633	0.151633	0.764341
UP_SEQ_FEATURE	repeat:WD 3	106	2.24529	0.000590549	7290, 256364, 1477, 57175, 22872, 11152, 55844, 1314, 112840, 26608, 27339, 8668, 79084, 55023, 11091, 79582, 84135, 50717, 55054, 56995, 23644, 80232, 54521, 64326, 64223, 134957, 5931, 8439, 23398, 8945, 5048, 2783, 2976, 5822, 91833, 1130, 11137, 1643, 49856, 10113, 57418, 55003, 51514, 253769, 83743, 10885, 8662, 27097, 9373, 2782, 23005, 9184, 23335, 79968, 987, 54554, 1762, 197335, 83939, 1…	4552	234	13191	1.3127	0.994504	0.181385	1.18411
UP_KEYWORDS	Ligase	136	2.88075	0.000598198	10206, 8535, 55236, 57674, 159, 55182, 10299, 10616, 27339, 9148, 29128, 64219, 23077, 9040, 9654, 10155, 23304, 130507, 57162, 84133, 672, 81847, 7407, 4193, 2752, 22888, 55191, 7337, 26001, 80829, 9867, 64326, 55658, 7345, 31, 6015, 149603, 5930, 8554, 283459, 57154, 26145, 6301, 10273, 8945, 16, 81559, 56888, 7189, 150465, 55167, 7187, 7186, 10277, 23295, 9025, 1503, 54476, 221687, 23395, 9093…	4583	311	13285	1.26762	0.293659	0.00679363	0.876006
GOTERM_CC_DIRECT	GO:0005876~spindle microtubule	25	0.529549	0.000598332	8881, 9611, 805, 1453, 329, 51203, 801, 332, 3832, 330, 24137, 983, 9371, 6790, 996, 348235, 9212, 4926, 10615, 6907, 5347, 808, 3796, 9055, 23332	4343	39	12453	1.83806	0.493337	0.0192385	0.956391
UP_KEYWORDS	DNA replication	47	0.995552	0.000610248	56652, 4774, 63922, 6240, 6241, 51659, 8318, 51550, 641, 11198, 1663, 5985, 6117, 5422, 6749, 4678, 5111, 116028, 51514, 4173, 23594, 4172, 5428, 4175, 5429, 4174, 10036, 81620, 64785, 4176, 5424, 5928, 5426, 9837, 9400, 5980, 4171, 3980, 55388, 2237, 54921, 29803, 80010, 55704, 5930, 6742, 5931	4583	89	13285	1.5308	0.29859	0.00679722	0.893578
GOTERM_MF_DIRECT	GO:0043022~ribosome binding	29	0.614277	0.000641367	1938, 83939, 90459, 84305, 6185, 2475, 54915, 143244, 8260, 28972, 27335, 91574, 253260, 3921, 2107, 10985, 53918, 8562, 23, 1965, 3396, 3309, 3692, 51119, 3954, 1984, 79631, 29927, 80155	4211	47	11857	1.73736	0.745342	0.0460716	1.10515
GOTERM_MF_DIRECT	GO:0016887~ATPase activity	73	1.54628	0.000647947	6595, 1191, 6597, 10856, 57674, 29028, 9557, 9861, 1861, 9551, 9928, 641, 8467, 1974, 481, 9493, 2956, 51773, 10061, 4650, 506, 3304, 56992, 509, 4363, 5706, 5704, 23, 5705, 63971, 5702, 3309, 5701, 79659, 22985, 64222, 9585, 1654, 55324, 80179, 215, 55729, 27183, 7415, 3312, 667, 23195, 513, 3320, 10632, 10111, 3796, 23095, 10112, 515, 4436, 10212, 3833, 8607, 3835, 10928, 1062, 1778, 498, 3329,…	4211	148	11857	1.38884	0.748892	0.0450176	1.11643
UP_KEYWORDS	WD repeat	110	2.33001	0.000678571	7290, 256364, 1477, 57175, 22872, 11152, 55844, 1314, 112840, 26608, 27339, 8668, 79084, 55023, 11091, 79582, 84135, 50717, 55054, 56995, 23644, 80232, 54521, 64326, 64223, 134957, 5931, 8439, 23398, 8945, 5048, 2783, 2976, 5822, 91833, 1130, 11137, 1643, 49856, 10113, 57418, 253769, 55003, 51514, 83743, 10885, 8662, 27097, 9373, 2782, 23005, 9184, 23335, 80304, 79968, 65065, 987, 54554, 1762, 19…	4583	245	13285	1.30148	0.325905	0.00741359	0.993159
KEGG_PATHWAY	hsa04110:Cell cycle	63	1.33446	0.000716406	8881, 2810, 7027, 8318, 9700, 983, 1387, 5885, 51529, 4193, 25, 8454, 472, 51434, 5934, 4088, 51433, 4089, 29882, 5591, 4609, 8243, 10971, 2033, 2932, 1027, 7040, 1031, 51343, 1647, 9126, 5347, 5111, 7272, 10735, 595, 23594, 4173, 4172, 4175, 4174, 7529, 4176, 699, 9088, 1017, 7465, 1019, 7157, 4171, 1871, 996, 994, 1022, 995, 9184, 7534, 3065, 7533, 3066, 7532, 891, 7531	1804	119	4809	1.41128	0.187657	0.0228279	0.948202
UP_KEYWORDS	Protein transport	229	4.85067	0.000716736	7494, 10897, 50999, 10890, 23511, 55745, 1314, 23279, 10204, 59343, 11097, 64689, 84079, 8021, 4218, 375035, 8027, 23265, 51160, 7879, 409, 8729, 163, 164, 7175, 738, 8724, 1984, 92609, 11336, 23636, 1434, 10228, 51699, 27183, 3843, 3842, 23011, 4641, 23633, 25909, 57617, 11345, 55670, 55737, 401505, 375056, 64083, 3837, 3836, 3839, 3838, 55738, 128866, 257364, 56907, 23033, 9600, 23233, 10952, 1…	4583	557	13285	1.19177	0.340698	0.00768464	1.04874
GOTERM_CC_DIRECT	GO:0016604~nuclear body	21	0.444821	0.000719476	84838, 79760, 79833, 8535, 22890, 2672, 4193, 22888, 7157, 112939, 25929, 55806, 92140, 463, 54472, 6239, 1387, 10488, 6497, 25820, 7874	4343	31	12453	1.94241	0.558518	0.0224557	1.14898
SMART	SM00317:SET	23	0.487185	0.000726066	79723, 63976, 2122, 55870, 10322, 6839, 55904, 23067, 7468, 7799, 9757, 9739, 80854, 54904, 4297, 10919, 8085, 55209, 79813, 9869, 58508, 29072, 64324	2429	35	6919	1.87187	0.405511	0.0716005	1.09265
INTERPRO	IPR019786:Zinc finger, PHD-type, conserved site	37	0.783732	0.000729478	4302, 5252, 1108, 55904, 1107, 22992, 23613, 23469, 6941, 11177, 23774, 26147, 51773, 10155, 22823, 30827, 5927, 83860, 55870, 8028, 7468, 51230, 54620, 54904, 57649, 55632, 8805, 79960, 51317, 57661, 9031, 2186, 23338, 64324, 7862, 10765, 11083	4344	66	12512	1.61471	0.966744	0.191618	1.36912
UP_SEQ_FEATURE	domain:Chromo 1	11	0.233001	0.000740337	23468, 57680, 84181, 1108, 10951, 1106, 1107, 1105, 55636, 80205, 11335	4552	12	13191	2.65636	0.998532	0.214654	1.48233
GOTERM_MF_DIRECT	GO:0008134~transcription factor binding	118	2.49947	0.000746783	3725, 688, 4204, 3148, 3280, 3146, 6874, 23462, 2648, 3726, 2295, 2296, 1387, 4212, 2957, 2958, 602, 1487, 3204, 3091, 6883, 22984, 10001, 6879, 1616, 219541, 161882, 1810, 4609, 8554, 57801, 54880, 64710, 4774, 2316, 81559, 10221, 6188, 6945, 4802, 3516, 1649, 3399, 1460, 10736, 595, 23522, 10514, 323, 7428, 1063, 6667, 340061, 5813, 10499, 23186, 9181, 5814, 2962, 7534, 23082, 2186, 7027, 6597,…	4211	259	11857	1.28284	0.796631	0.050081	1.28569
GOTERM_CC_DIRECT	GO:0030687~preribosome, large subunit precursor	19	0.402457	0.000747198	54881, 8568, 6181, 10412, 117246, 23212, 51388, 51018, 3692, 23481, 6176, 10969, 6175, 23195, 54663, 80135, 23076, 79080, 51154	4343	27	12453	2.01778	0.572215	0.0226882	1.19301
INTERPRO	IPR001680:WD40 repeat	106	2.24529	0.000747871	7290, 256364, 1477, 57175, 22872, 11152, 55844, 1314, 112840, 26608, 27339, 8668, 79084, 55023, 11091, 79582, 8021, 84135, 50717, 55054, 56995, 23644, 80232, 54521, 64326, 64223, 134957, 5931, 8439, 23398, 8945, 5048, 2783, 2976, 5822, 91833, 1130, 11137, 1643, 49856, 10113, 57418, 55003, 51514, 253769, 83743, 10885, 27097, 9373, 2782, 23005, 9184, 23335, 79968, 65065, 987, 54554, 1762, 197335, 1…	4344	234	12512	1.30475	0.96948	0.185562	1.40341
UP_SEQ_FEATURE	repeat:WD 2	109	2.30883	0.000757445	7290, 256364, 1477, 57175, 22872, 11152, 55844, 1314, 112840, 26608, 27339, 8668, 79084, 55023, 11091, 79582, 84135, 50717, 55054, 56995, 23644, 80232, 54521, 64326, 64223, 134957, 5931, 8439, 23398, 8945, 5048, 2783, 2976, 5822, 91833, 1130, 11137, 1643, 49856, 10113, 57418, 253769, 55003, 51514, 83743, 10885, 8662, 27097, 9373, 2782, 23005, 9184, 23335, 80304, 79968, 65065, 987, 54554, 1762, 19…	4552	243	13191	1.29986	0.998738	0.212103	1.51634
UP_SEQ_FEATURE	repeat:WD 1	109	2.30883	0.000757445	7290, 256364, 1477, 57175, 22872, 11152, 55844, 1314, 112840, 26608, 27339, 8668, 79084, 55023, 11091, 79582, 84135, 50717, 55054, 56995, 23644, 80232, 54521, 64326, 64223, 134957, 5931, 8439, 23398, 8945, 5048, 2783, 2976, 5822, 91833, 1130, 11137, 1643, 49856, 10113, 57418, 253769, 55003, 51514, 83743, 10885, 8662, 27097, 9373, 2782, 23005, 9184, 23335, 80304, 79968, 65065, 987, 54554, 1762, 19…	4552	243	13191	1.29986	0.998738	0.212103	1.51634
INTERPRO	IPR017986:WD40-repeat-containing domain	120	2.54183	0.00080186	7290, 256364, 1477, 57175, 22872, 11152, 55844, 1314, 112840, 26608, 27339, 8668, 79084, 55023, 79582, 11091, 84135, 50717, 55054, 56995, 23644, 23450, 80232, 54521, 64326, 64223, 134957, 5931, 8439, 23398, 8945, 5048, 2783, 2976, 5822, 91833, 1130, 11137, 1643, 49856, 10113, 57418, 1642, 253769, 51514, 55003, 83743, 10885, 8662, 27097, 9373, 2782, 23339, 23005, 9184, 23335, 80304, 79968, 65065, …	4344	270	12512	1.28013	0.976279	0.187674	1.50399
GOTERM_CC_DIRECT	GO:0034709~methylosome	11	0.233001	0.000814721	3276, 2079, 6628, 6637, 6636, 6633, 79084, 6634, 10419, 6632, 1207	4343	12	12453	2.62843	0.603825	0.0240713	1.30016
UP_KEYWORDS	Chromosome partition	25	0.529549	0.000842475	6732, 3619, 9391, 699, 11243, 2908, 332, 25936, 292, 9700, 79980, 57082, 10664, 7756, 348995, 5518, 1654, 9184, 8239, 64793, 5885, 151246, 10783, 79003, 10735	4583	40	13285	1.81172	0.38718	0.00886383	1.23167
GOTERM_MF_DIRECT	GO:0031492~nucleosomal DNA binding	24	0.508367	0.000846778	126961, 6599, 6598, 1108, 5928, 6597, 79366, 9555, 1104, 8091, 53615, 3015, 10473, 3021, 3183, 9219, 3065, 3066, 6601, 60, 3151, 8358, 9324, 8356	4211	37	11857	1.82641	0.835706	0.0548773	1.45666
GOTERM_MF_DIRECT	GO:0003714~transcription corepressor activity	82	1.73692	0.000868598	7290, 55749, 7536, 8531, 4204, 7026, 6597, 8535, 3281, 3726, 10409, 84962, 54856, 1822, 51460, 4212, 6498, 6497, 10155, 708, 171023, 57761, 51132, 51564, 26155, 10140, 9611, 11244, 5702, 51053, 166, 51567, 55806, 10370, 1616, 23741, 10766, 10664, 7342, 1810, 9112, 2909, 64324, 10765, 23411, 861, 23051, 8554, 9318, 11278, 54880, 8553, 8861, 55729, 8204, 6907, 1649, 3399, 4783, 8994, 4863, 595, 999…	4211	171	11857	1.35023	0.84318	0.0545942	1.49392
SMART	SM00320:WD40	106	2.24529	0.000880638	7290, 256364, 1477, 57175, 22872, 11152, 55844, 1314, 112840, 26608, 27339, 8668, 79084, 55023, 11091, 79582, 8021, 84135, 50717, 55054, 56995, 23644, 80232, 54521, 64326, 64223, 134957, 5931, 8439, 23398, 8945, 5048, 2783, 2976, 5822, 91833, 1130, 11137, 1643, 49856, 10113, 57418, 55003, 51514, 253769, 83743, 10885, 27097, 9373, 2782, 23005, 9184, 23335, 79968, 65065, 987, 54554, 1762, 197335, 1…	2429	233	6919	1.29588	0.467842	0.0758231	1.32382
GOTERM_CC_DIRECT	GO:0005643~nuclear pore	36	0.76255	0.000885872	8888, 23636, 10527, 3843, 23279, 4641, 23633, 55161, 4927, 143244, 25909, 29107, 59343, 11097, 9972, 5905, 23225, 3837, 55795, 3836, 30849, 3839, 11269, 3838, 55308, 9818, 8086, 5901, 23165, 5903, 7175, 1984, 10762, 11260, 55706, 3267	4343	64	12453	1.6129	0.634612	0.0254849	1.41294
GOTERM_MF_DIRECT	GO:0003690~double-stranded DNA binding	40	0.847278	0.000890301	8531, 64710, 3148, 26065, 3149, 9987, 1956, 3146, 7516, 27332, 10270, 130916, 1499, 7391, 1663, 7520, 2956, 4904, 8545, 55795, 55775, 55247, 4436, 1385, 7978, 6667, 7157, 11315, 11284, 9667, 2237, 6304, 23435, 4221, 2547, 9682, 5591, 2968, 4609, 201254	4211	72	11857	1.56429	0.850277	0.0543209	1.53098
GOTERM_BP_DIRECT	GO:0000715~nucleotide-excision repair, DNA damage recognition	17	0.360093	0.000904435	9318, 8533, 10980, 50813, 7316, 7314, 7508, 6233, 7311, 2873, 1069, 8451, 5887, 8450, 1643, 1642, 142	4171	23	11756	2.08325	0.997945	0.102866	1.76298
GOTERM_BP_DIRECT	GO:0002181~cytoplasmic translation	17	0.360093	0.000904435	6181, 6160, 6132, 6154, 6165, 6159, 6176, 6175, 25873, 8669, 1975, 7458, 51154, 200916, 6138, 6128, 285855	4171	23	11756	2.08325	0.997945	0.102866	1.76298
GOTERM_BP_DIRECT	GO:1903507~negative regulation of nucleic acid-templated transcription	21	0.444821	0.000924041	9994, 4863, 7290, 7536, 60491, 9425, 55749, 10140, 9318, 3223, 328, 10284, 10419, 5702, 51567, 10766, 8804, 9112, 10782, 79039, 6427	4171	31	11756	1.90931	0.998203	0.103262	1.80087
GOTERM_BP_DIRECT	GO:0006754~ATP biosynthetic process	18	0.381275	0.00093298	506, 2631, 509, 226, 790955, 9551, 498, 400916, 522, 513, 521, 7040, 10632, 518, 5315, 517, 10165, 515	4171	25	11756	2.02933	0.998309	0.102535	1.81814
GOTERM_BP_DIRECT	GO:0000375~RNA splicing, via transesterification reactions	18	0.381275	0.00093298	8570, 27257, 23451, 23450, 10907, 51163, 10285, 10946, 10286, 9129, 9128, 6429, 10594, 10262, 10250, 9169, 10569, 9416	4171	25	11756	2.02933	0.998309	0.102535	1.81814
GOTERM_BP_DIRECT	GO:0007052~mitotic spindle organization	20	0.423639	0.000939533	8243, 5116, 29899, 3832, 1104, 51119, 1778, 5901, 6790, 9371, 10540, 6491, 10769, 9126, 3925, 4134, 3796, 891, 7272, 23332	4171	29	11756	1.9438	0.998384	0.101587	1.8308
GOTERM_BP_DIRECT	GO:0031929~TOR signaling	11	0.233001	0.000951883	6198, 96459, 201163, 55704, 1978, 253260, 1979, 23367, 57521, 6194, 2475	4171	12	11756	2.58363	0.998515	0.101254	1.85465
GOTERM_MF_DIRECT	GO:0004386~helicase activity	43	0.910824	0.000952337	79665, 6595, 55760, 170506, 57634, 6597, 8886, 1106, 113510, 1107, 1105, 57696, 10521, 57697, 641, 8467, 1662, 1663, 9775, 1974, 1975, 9931, 23405, 89797, 55661, 11325, 23020, 90957, 301, 11269, 10847, 55308, 1660, 80205, 9704, 1656, 57062, 546, 1654, 7458, 5976, 55636, 9416	4211	79	11857	1.53261	0.868842	0.0563864	1.63683
GOTERM_MF_DIRECT	GO:0004003~ATP-dependent DNA helicase activity	20	0.423639	0.000952835	4173, 4175, 4176, 1108, 10856, 1106, 1107, 10363, 1105, 9557, 1660, 641, 1663, 1654, 7520, 2547, 10111, 10146, 83990, 2968	4211	29	11857	1.94188	0.868981	0.0548918	1.63768
GOTERM_CC_DIRECT	GO:0016363~nuclear matrix	48	1.01673	0.000974037	22976, 10856, 10270, 24137, 9360, 6421, 1072, 641, 4001, 387103, 1051, 25909, 10296, 4926, 1822, 9126, 29128, 5422, 8520, 55660, 26012, 4670, 6732, 7528, 30827, 4841, 8507, 22828, 284695, 10238, 8607, 2672, 51588, 1063, 7157, 3856, 790, 5590, 6304, 80139, 55791, 4221, 10250, 11331, 7919, 23314, 11260, 9782	4343	92	12453	1.49602	0.669466	0.0272967	1.55254
BIOCARTA	h_npcPathway:Mechanism of Protein Import into the Nucleus	12	0.254183	0.0010239	8021, 23636, 5905, 23225, 3837, 3838, 1104, 9972, 10204, 5901, 8420, 5903	520	13	1324	2.3503	0.252436	0.135382	1.34832
BIOCARTA	h_smPathway:Spliceosomal Assembly	12	0.254183	0.0010239	6626, 7307, 6628, 6637, 6629, 6636, 6633, 6625, 6634, 6632, 6631, 6427	520	13	1324	2.3503	0.252436	0.135382	1.34832
KEGG_PATHWAY	hsa05012:Parkinson's disease	58	1.22855	0.00103187	1351, 1350, 29796, 4697, 6391, 1349, 1347, 51465, 506, 509, 1327, 7314, 10105, 7345, 4695, 4696, 1337, 7388, 4694, 7386, 7384, 7327, 7326, 7416, 7417, 4702, 10975, 7419, 4700, 4731, 27089, 513, 2771, 7332, 9167, 518, 126328, 517, 515, 9377, 4728, 4716, 4723, 7317, 4713, 4726, 4725, 4715, 440567, 2773, 498, 292, 4710, 522, 11315, 54205, 55967, 6389	1804	109	4809	1.41847	0.258735	0.029496	1.3631
GOTERM_BP_DIRECT	GO:0019827~stem cell population maintenance	28	0.593095	0.0010791	8243, 57721, 9968, 4853, 27257, 55183, 9412, 1499, 84246, 8324, 9126, 80312, 26147, 6926, 81603, 22823, 9443, 54623, 657, 79577, 79918, 9739, 56339, 23318, 23168, 1656, 25836, 9314	4171	46	11756	1.71561	0.999378	0.112262	2.10003
GOTERM_BP_DIRECT	GO:0045727~positive regulation of translation	27	0.571913	0.00115798	6659, 1938, 27230, 84305, 6895, 2475, 9775, 1994, 1153, 23034, 602, 4869, 23, 1019, 23367, 3692, 1982, 6198, 1654, 3184, 6191, 5859, 5935, 7919, 7057, 26986, 5594	4171	44	11756	1.72954	0.999638	0.118173	2.25188
GOTERM_BP_DIRECT	GO:0045815~positive regulation of gene expression, epigenetic	27	0.571913	0.00115798	5434, 5435, 2033, 9555, 4641, 2648, 51082, 8467, 6908, 8364, 84172, 60, 8367, 5441, 10514, 126961, 79101, 23451, 3021, 64425, 7913, 25885, 9013, 9188, 9031, 8358, 8356	4171	44	11756	1.72954	0.999638	0.118173	2.25188
GOTERM_MF_DIRECT	GO:0042802~identical protein binding	255	5.4014	0.00115968	3725, 1198, 10342, 332, 2335, 3281, 25798, 5635, 5634, 334, 3480, 3482, 8737, 29128, 79602, 6091, 23647, 51094, 207, 3297, 8312, 6778, 6607, 11335, 215, 58487, 22794, 1075, 7327, 2317, 22919, 6895, 54471, 7189, 7188, 3949, 7186, 6470, 2597, 22926, 1460, 6472, 3945, 10733, 23390, 90933, 4091, 1445, 226, 55201, 128866, 10212, 2303, 285704, 10318, 257364, 84876, 5631, 55388, 3939, 610, 10606, 51282,…	4211	614	11857	1.1694	0.915742	0.0646751	1.98984
UP_SEQ_FEATURE	compositionally biased region:Asp-rich	20	0.423639	0.00117441	10527, 51575, 84946, 91057, 23067, 64061, 80196, 29028, 8661, 10075, 54856, 10944, 57680, 23350, 58508, 51729, 1975, 5422, 2186, 55832	4552	30	13191	1.9319	0.999968	0.30019	2.3417
UP_SEQ_FEATURE	repeat:HEAT 6	20	0.423639	0.00117441	10985, 26953, 3837, 7514, 64151, 23451, 3843, 30000, 3842, 2475, 54919, 5518, 23066, 23116, 9989, 9670, 23392, 23332, 9793, 55832	4552	30	13191	1.9319	0.999968	0.30019	2.3417
GOTERM_BP_DIRECT	GO:0031047~gene silencing by RNA	44	0.932006	0.00117533	23636, 5434, 5435, 10526, 23511, 5438, 29102, 90459, 6895, 23279, 4927, 348995, 23405, 11097, 8364, 9972, 8367, 23112, 5441, 8021, 23225, 126961, 9818, 8086, 5901, 23165, 5903, 3021, 54487, 7175, 7247, 22916, 55571, 27327, 5431, 5430, 5433, 5432, 8358, 29883, 10762, 26986, 55706, 8356	4171	82	11756	1.51237	0.999678	0.118077	2.28526
INTERPRO	IPR023779:Chromo domain, conserved site	13	0.275365	0.0011892	9425, 23468, 79723, 6839, 8535, 84733, 10951, 23466, 1106, 1107, 1105, 124359, 11335	4344	16	12512	2.34024	0.996111	0.2533	2.2228
UP_SEQ_FEATURE	short sequence motif:Prevents secretion from ER	31	0.656641	0.0011948	10525, 4043, 10130, 9601, 54732, 79709, 80267, 5479, 56886, 23753, 80020, 7184, 811, 813, 2923, 5589, 10536, 10961, 60681, 9562, 3309, 5034, 23509, 8824, 23184, 10439, 55033, 5954, 871, 5955, 9131	4552	54	13191	1.66358	0.999973	0.296047	2.38191
GOTERM_BP_DIRECT	GO:0016575~histone deacetylation	26	0.550731	0.00123945	25942, 1108, 1107, 22933, 10362, 23309, 11176, 9219, 6907, 5928, 5245, 51742, 10284, 53615, 10933, 64426, 25855, 51317, 9112, 3065, 23028, 3066, 10432, 23411, 9643, 5931	4171	42	11756	1.74479	0.999793	0.122318	2.4085
GOTERM_CC_DIRECT	GO:0034719~SMN-Sm protein complex	13	0.275365	0.00124468	79760, 50628, 6637, 6628, 6636, 79833, 6633, 6634, 11218, 11171, 25929, 6632, 6607	4343	16	12453	2.32974	0.757034	0.0339195	1.97988
GOTERM_BP_DIRECT	GO:0006275~regulation of DNA replication	12	0.254183	0.00124975	26057, 64710, 114799, 9126, 5515, 5518, 253461, 3399, 55704, 5111, 5930, 10919	4171	14	11756	2.41586	0.999807	0.121521	2.42828
GOTERM_BP_DIRECT	GO:0042981~regulation of apoptotic process	80	1.69456	0.0012574	23239, 10818, 4041, 5894, 332, 330, 8125, 26267, 27166, 9748, 8772, 8837, 23753, 1387, 22900, 6498, 81, 87, 602, 6662, 2619, 26156, 9500, 672, 581, 283349, 835, 7132, 5366, 8682, 4833, 64065, 162989, 4830, 7178, 4832, 472, 6446, 5876, 23786, 81611, 1958, 7001, 7415, 51499, 665, 83593, 6188, 666, 1843, 7188, 7187, 7040, 7186, 10011, 8795, 58517, 8996, 1508, 811, 9231, 57142, 54870, 9618, 598, 329,…	4171	168	11756	1.34215	0.999817	0.120507	2.44296
GOTERM_CC_DIRECT	GO:0000151~ubiquitin ligase complex	48	1.01673	0.00131095	79184, 64750, 9968, 26262, 10273, 3312, 9412, 26267, 10425, 84246, 25898, 26268, 7186, 7332, 25897, 10277, 25793, 9025, 54476, 51130, 400569, 26224, 56254, 23304, 130507, 8445, 25820, 9810, 54850, 55832, 3304, 9443, 11060, 26234, 3301, 672, 154214, 79872, 80204, 10210, 5469, 10001, 7321, 7324, 7322, 54797, 26235, 84231	4343	93	12453	1.47993	0.774677	0.0348593	2.08427
GOTERM_CC_DIRECT	GO:0070062~extracellular exosome	826	17.4963	0.0013458	23659, 23654, 79807, 5373, 29028, 949, 334, 347862, 2950, 3482, 535, 537, 1829, 196463, 8407, 5361, 10099, 2, 10092, 3490, 7345, 10097, 8724, 10094, 339487, 10728, 80727, 1434, 1431, 27183, 7326, 5355, 310, 5352, 5351, 6888, 7332, 6470, 7336, 6472, 51293, 515, 1845, 1445, 128866, 7317, 7316, 10075, 5339, 6897, 1832, 523, 908, 7322, 7323, 203068, 527, 29952, 3241, 55276, 983, 5134, 63979, 50865, 9…	4343	2190	12453	1.08148	0.783434	0.0349526	2.13912
INTERPRO	IPR002464:DNA/RNA helicase, ATP-dependent, DEAH-box type, conserved site	16	0.338911	0.00140324	79665, 90957, 170506, 84181, 1108, 1107, 22907, 9400, 9557, 1660, 641, 8458, 1665, 375748, 1659, 9785	4344	22	12512	2.09476	0.998569	0.279252	2.61788
UP_SEQ_FEATURE	repeat:WD 4	99	2.09701	0.00141435	7290, 256364, 1477, 57175, 22872, 55844, 1314, 112840, 26608, 27339, 8668, 79084, 55023, 11091, 79582, 84135, 50717, 55054, 23644, 80232, 54521, 64326, 64223, 134957, 5931, 8439, 23398, 8945, 5048, 2783, 2976, 5822, 91833, 1130, 11137, 1643, 49856, 57418, 55003, 51514, 253769, 83743, 10885, 8662, 27097, 9373, 2782, 23005, 9184, 23335, 79968, 987, 54554, 1762, 197335, 10399, 89891, 25929, 54663, 5…	4552	221	13191	1.29813	0.999996	0.331146	2.81369
GOTERM_MF_DIRECT	GO:0008327~methyl-CpG binding	13	0.275365	0.00149536	3276, 4204, 10419, 57659, 1786, 53615, 26097, 2079, 253461, 79084, 10009, 29128, 49854	4211	16	11857	2.28777	0.958848	0.0805323	2.55882
GOTERM_BP_DIRECT	GO:0006357~regulation of transcription from RNA polymerase II promoter	154	3.26202	0.00154052	7290, 7750, 100507290, 3148, 1108, 3146, 6621, 1106, 6874, 1107, 29855, 1105, 2648, 221937, 3726, 1523, 10691, 22906, 1388, 79084, 27336, 10923, 90843, 400569, 6493, 9443, 9441, 1893, 672, 1385, 10001, 7073, 7342, 8725, 7690, 54797, 5934, 6601, 6778, 23314, 5932, 4779, 64710, 4775, 10272, 27086, 10522, 6894, 5612, 4802, 7629, 7422, 6941, 22926, 29777, 58486, 1999, 4094, 79830, 7528, 54870, 3223, …	4171	355	11756	1.22268	0.999974	0.143612	2.98516
GOTERM_BP_DIRECT	GO:0051568~histone H3-K4 methylation	14	0.296547	0.0016445	22976, 30827, 55870, 55904, 23067, 5929, 9739, 9757, 4297, 7403, 8085, 80335, 58508, 11091	4171	18	11756	2.19217	0.999987	0.1505	3.18359
GOTERM_BP_DIRECT	GO:0031124~mRNA 3'-end processing	28	0.593095	0.00168587	79869, 1477, 22794, 10978, 9775, 10569, 53981, 6432, 9939, 51585, 8563, 6430, 10212, 9877, 8683, 9295, 26097, 7307, 11338, 10914, 22916, 6429, 6428, 10250, 9785, 7919, 6427, 6426	4171	47	11756	1.67911	0.99999	0.151957	3.26241
GOTERM_BP_DIRECT	GO:0006405~RNA export from nucleus	28	0.593095	0.00168587	23636, 8021, 9939, 6432, 23511, 8563, 6430, 22794, 10212, 9877, 8683, 5902, 26097, 9295, 7307, 11338, 9775, 29107, 7175, 22916, 6429, 6428, 10250, 10569, 9785, 7919, 6427, 6426	4171	47	11756	1.67911	0.99999	0.151957	3.26241
GOTERM_BP_DIRECT	GO:0030512~negative regulation of transforming growth factor beta receptor signaling pathway	32	0.677822	0.0018024	64750, 7494, 57154, 10273, 1785, 11171, 25805, 7040, 5654, 26036, 6498, 6497, 7046, 4091, 23625, 2734, 5300, 23592, 23089, 63976, 7316, 857, 3309, 7314, 6233, 7311, 114990, 5494, 9110, 4088, 2022, 23411	4171	56	11756	1.61058	0.999996	0.159489	3.48414
GOTERM_BP_DIRECT	GO:0000717~nucleotide-excision repair, DNA duplex unwinding	16	0.338911	0.00180561	7316, 9557, 404672, 7314, 7508, 6233, 7311, 1069, 8451, 5887, 8450, 1643, 1642, 142, 2968, 2967	4171	22	11756	2.04982	0.999996	0.157716	3.49025
UP_KEYWORDS	Cytoskeleton	368	7.79496	0.00180906	7205, 256364, 8881, 146057, 805, 800, 801, 332, 55845, 10899, 80212, 55740, 9857, 6491, 7169, 7168, 1729, 9859, 23271, 10615, 3925, 23136, 2011, 85464, 2017, 6093, 8871, 4218, 8409, 90799, 23503, 83903, 55755, 55752, 25, 26005, 27, 10092, 10097, 7175, 10094, 219899, 84687, 402, 1495, 5216, 11083, 23636, 55920, 5252, 23637, 1453, 8030, 1452, 829, 2316, 2317, 2314, 22919, 54888, 57223, 163786, 1072…	4583	943	13285	1.13122	0.650768	0.0186107	2.62736
GOTERM_BP_DIRECT	GO:0061418~regulation of transcription from RNA polymerase II promoter in response to hypoxia	17	0.360093	0.00182194	571, 1958, 2033, 54583, 3091, 7428, 7316, 7314, 6233, 7311, 7321, 7422, 8453, 1387, 7322, 7323, 55662	4171	24	11756	1.99644	0.999996	0.157026	3.52128
GOTERM_MF_DIRECT	GO:0008026~ATP-dependent helicase activity	18	0.381275	0.00183027	79665, 23020, 170506, 84181, 1108, 22907, 9400, 9557, 1660, 9401, 641, 8458, 1663, 375748, 1659, 83990, 9785, 9416	4211	26	11857	1.94935	0.979873	0.0952951	3.12339
GOTERM_CC_DIRECT	GO:0030686~90S preribosome	10	0.21182	0.00196829	9790, 88745, 6201, 26156, 55127, 84319, 153443, 9277, 3921, 8602	4343	11	12453	2.6067	0.893348	0.0495957	3.11397
GOTERM_BP_DIRECT	GO:0060071~Wnt signaling pathway, planar cell polarity pathway	45	0.953188	0.00197693	5717, 5718, 64750, 57154, 9968, 5710, 1952, 9861, 5686, 5713, 5685, 7474, 5683, 5716, 9491, 8322, 8324, 387, 10197, 1173, 7855, 84133, 5708, 5709, 5706, 5707, 5691, 5704, 5705, 7316, 5702, 5695, 7314, 1855, 5701, 6233, 7311, 409, 5688, 5689, 163, 1213, 2535, 5879, 5216	4171	86	11756	1.4748	0.999999	0.167115	3.81533
GOTERM_BP_DIRECT	GO:0006915~apoptotic process	190	4.02457	0.00203379	55749, 285237, 4205, 84273, 8887, 27069, 332, 330, 8744, 22974, 9927, 26267, 9748, 83879, 10298, 9141, 6416, 63916, 8737, 22900, 23136, 220042, 6495, 677, 26155, 8870, 415116, 672, 23645, 6885, 90525, 4297, 208, 8682, 5366, 51234, 1718, 1616, 84681, 8193, 7073, 1984, 8312, 4832, 9538, 8539, 23787, 23786, 1459, 1434, 81037, 51100, 1075, 7416, 51499, 10670, 6188, 8655, 7188, 10015, 7187, 9774, 1001…	4171	450	11756	1.19004	0.999999	0.169408	3.92299
UP_SEQ_FEATURE	region of interest:S-adenosyl-L-methionine binding	20	0.423639	0.00205795	2091, 387338, 118881, 9836, 84444, 28989, 9757, 54888, 1312, 80854, 4297, 10919, 79813, 8085, 58508, 4548, 55006, 4837, 4839, 56257	4552	31	13191	1.86958	1	0.432832	4.06899
UP_SEQ_FEATURE	compositionally biased region:Poly-Gly	107	2.26647	0.00214073	256364, 23131, 8886, 6874, 55844, 6421, 2295, 2296, 339287, 8669, 11325, 79002, 678, 7546, 3206, 3207, 113263, 4297, 27, 112939, 7204, 4609, 23060, 5454, 8030, 826, 124808, 22794, 25778, 10270, 10521, 22859, 1847, 4091, 65078, 51218, 219931, 23592, 26058, 3223, 64599, 55071, 55170, 9757, 8660, 91304, 9371, 7916, 10743, 6670, 3110, 7025, 9829, 23174, 23207, 5887, 8500, 3192, 4150, 3237, 81, 9972, …	4552	244	13191	1.27078	1	0.435637	4.22932
GOTERM_CC_DIRECT	GO:0008180~COP9 signalosome	21	0.444821	0.0022125	3305, 154796, 7111, 9318, 8533, 10980, 50813, 11180, 154810, 150678, 3309, 3326, 9730, 498, 8655, 10409, 2873, 2885, 4627, 30968, 2037	4343	33	12453	1.82469	0.919233	0.0543808	3.49392
UP_SEQ_FEATURE	repeat:3	53	1.12264	0.00227386	2055, 11054, 800, 8570, 85378, 1105, 9829, 55740, 6421, 22905, 10618, 3482, 55814, 55603, 400566, 9500, 3097, 643314, 23645, 9818, 9295, 89887, 7840, 4691, 10762, 402055, 29978, 23636, 2130, 8030, 4775, 6634, 7414, 310, 1786, 6238, 8148, 7629, 4134, 4130, 11135, 6432, 4670, 7428, 8661, 8085, 10024, 5528, 4288, 7716, 5430, 9188, 56623	4552	108	13191	1.42209	1	0.445562	4.48664
UP_KEYWORDS	Zinc	693	14.6791	0.00230746	7205, 80742, 8887, 332, 23516, 330, 10898, 23650, 25799, 197407, 10616, 25792, 85463, 11097, 29128, 22803, 79602, 10713, 6093, 23503, 26009, 118987, 8028, 57215, 79817, 79813, 7337, 26001, 80829, 546, 149603, 84085, 11083, 5252, 84295, 23536, 7227, 51193, 27086, 10730, 22921, 2971, 58486, 90933, 811, 79830, 23522, 8427, 101060200, 329, 284695, 51385, 100101467, 23528, 339324, 10743, 55388, 339318…	4583	1848	13285	1.08703	0.738725	0.023272	3.3398
GOTERM_CC_DIRECT	GO:0000786~nucleosome	26	0.550731	0.00232775	8969, 8338, 3005, 3006, 9555, 3008, 7994, 8364, 94239, 8971, 10061, 8367, 23522, 126961, 3014, 3015, 3017, 3021, 8336, 85236, 8334, 8358, 84250, 50809, 8330, 8356	4343	44	12453	1.69436	0.929165	0.0559274	3.67274
INTERPRO	IPR002423:Chaperonin Cpn60/TCP-1	11	0.233001	0.00232959	10575, 10576, 908, 10574, 200576, 6950, 22948, 7203, 79738, 166379, 3329	4344	13	12512	2.43717	0.999981	0.404286	4.31036
INTERPRO	IPR027409:GroEL-like apical domain	11	0.233001	0.00232959	10575, 10576, 908, 10574, 200576, 6950, 22948, 7203, 79738, 166379, 3329	4344	13	12512	2.43717	0.999981	0.404286	4.31036
UP_SEQ_FEATURE	compositionally biased region:Ser-rich	150	3.17729	0.00236017	114823, 29123, 114825, 146057, 196441, 23131, 84733, 1106, 29855, 92521, 1105, 124245, 23274, 9857, 57670, 10923, 11097, 253260, 7162, 23077, 79596, 3858, 3097, 23505, 23644, 9739, 54620, 22985, 3856, 51621, 64224, 64326, 125058, 27125, 55658, 23476, 92154, 27327, 10725, 9644, 25831, 8554, 81610, 9909, 92345, 22990, 144108, 23013, 6942, 23091, 6749, 4783, 1849, 23116, 57610, 10114, 23524, 79830, …	4552	357	13191	1.21758	1	0.448285	4.65312
INTERPRO	IPR001487:Bromodomain	25	0.529549	0.00238288	6595, 65980, 158358, 2033, 6597, 29028, 2648, 23613, 11176, 6046, 11177, 1387, 23774, 55023, 10155, 10902, 55870, 4297, 55193, 8805, 23476, 54014, 2186, 9031, 7862	4344	42	12512	1.71446	0.999985	0.396962	4.40688
UP_SEQ_FEATURE	repeat:HEAT 4	24	0.508367	0.00239138	10985, 26953, 3837, 7514, 64151, 23451, 30000, 3843, 8672, 3842, 54919, 22820, 2475, 25836, 5518, 23066, 23116, 9989, 9670, 23392, 23332, 9793, 3064, 55832	4552	40	13191	1.73871	1	0.443372	4.71325
GOTERM_CC_DIRECT	GO:0016282~eukaryotic 43S preinitiation complex	11	0.233001	0.0024218	8668, 8669, 27335, 51386, 8662, 8661, 8667, 8666, 3646, 10480, 8664	4343	13	12453	2.42624	0.93636	0.0569222	3.81845
KEGG_PATHWAY	hsa00190:Oxidative phosphorylation	54	1.14383	0.00243714	1351, 1350, 29796, 9550, 4697, 9551, 535, 6391, 1349, 537, 1347, 506, 509, 1327, 9296, 4695, 4696, 1337, 7388, 4694, 7386, 7384, 155066, 4702, 10975, 4700, 4731, 27089, 513, 5464, 10632, 9167, 8992, 518, 126328, 517, 515, 9377, 4728, 4716, 4713, 4723, 4726, 4725, 4715, 440567, 4710, 498, 522, 521, 55967, 523, 6389, 527	1804	103	4809	1.39757	0.507191	0.0623047	3.19182
UP_KEYWORDS	Mitochondrion inner membrane	102	2.16056	0.00245156	29796, 4697, 26164, 84273, 27069, 55186, 7298, 55744, 51629, 9551, 37, 5018, 10131, 60386, 1327, 63933, 23456, 5832, 1376, 4695, 4696, 92609, 4694, 11331, 10165, 23787, 5250, 81034, 23530, 26284, 27089, 6188, 10730, 513, 9167, 6472, 515, 9377, 1468, 598, 5245, 51117, 25994, 440567, 498, 292, 522, 521, 51312, 6389, 617, 6576, 26517, 51537, 1351, 1350, 23203, 11194, 8834, 123096, 6391, 30968, 29957…	4583	232	13285	1.27445	0.759757	0.0242882	3.54489
BBID	104.Insulin_signaling	11	0.233001	0.00245315	5781, 5894, 2885, 1938, 7037, 3667, 5295, 207, 6654, 5594, 2475	105	13	291	2.34505	0.215855	0.215855	2.68434
UP_SEQ_FEATURE	compositionally biased region:Asp/Glu-rich (highly acidic)	17	0.360093	0.00246104	5905, 81611, 3204, 11231, 4869, 23641, 7979, 8125, 4898, 334, 10541, 8664, 1983, 7913, 6418, 10456, 23401	4552	25	13191	1.97054	1	0.443812	4.84733
UP_SEQ_FEATURE	domain:PCI	13	0.275365	0.00260817	5717, 65992, 5718, 2873, 9318, 8533, 5709, 55795, 50813, 8661, 9861, 3646, 10480	4552	17	13191	2.216	1	0.454147	5.12993
INTERPRO	IPR000717:Proteasome component (PCI) domain	12	0.254183	0.00261012	5717, 5718, 2873, 9318, 8533, 5709, 55795, 50813, 8661, 9861, 3646, 10480	4344	15	12512	2.30424	0.999995	0.411382	4.81737
UP_KEYWORDS	Bromodomain	23	0.487185	0.00261596	6595, 65980, 6597, 2033, 55870, 29028, 4297, 55193, 2648, 23613, 8805, 23476, 54014, 11176, 11177, 6046, 1387, 23774, 55023, 9031, 2186, 7862, 10902	4583	38	13285	1.75451	0.781696	0.0254645	3.77837
INTERPRO	IPR018359:Bromodomain, conserved site	17	0.360093	0.00264204	6595, 2033, 6597, 55193, 2648, 8805, 23476, 54014, 11176, 11177, 6046, 1387, 23774, 55023, 9031, 2186, 7862	4344	25	12512	1.9586	0.999996	0.401971	4.87491
GOTERM_MF_DIRECT	GO:0042826~histone deacetylase binding	45	0.953188	0.00270251	84295, 54880, 170506, 4204, 4205, 3280, 22933, 10270, 6421, 8204, 2648, 7189, 7391, 1051, 23468, 3320, 9219, 10467, 5586, 595, 3304, 9611, 7529, 3206, 5928, 3838, 5245, 7155, 3091, 7153, 11218, 51053, 3326, 6667, 6668, 64426, 25855, 25836, 3184, 3065, 9314, 7531, 5879, 142, 23381	4211	87	11857	1.45641	0.996879	0.134319	4.57932
GOTERM_CC_DIRECT	GO:0005852~eukaryotic translation initiation factor 3 complex	12	0.254183	0.00271989	8668, 8669, 1654, 27335, 51386, 8662, 8661, 8667, 8666, 3646, 10480, 8664	4343	15	12453	2.2939	0.95468	0.0624249	4.27887
GOTERM_CC_DIRECT	GO:0000502~proteasome complex	32	0.677822	0.00277201	5717, 5718, 5710, 7415, 9861, 5686, 5713, 5685, 5683, 5716, 9491, 10197, 5887, 5886, 23392, 9690, 5708, 5709, 5706, 5707, 5691, 5704, 5705, 5702, 7466, 7979, 5695, 5701, 7337, 5688, 5689, 11047	4343	58	12453	1.582	0.957292	0.0623275	4.35916
GOTERM_CC_DIRECT	GO:0005719~nuclear euchromatin	17	0.360093	0.00278522	3725, 10856, 3005, 3006, 9739, 1385, 3015, 1499, 27316, 8805, 6908, 5430, 9314, 10155, 23411, 26012, 11335	4343	25	12453	1.94981	0.95793	0.0614025	4.37951
UP_KEYWORDS	Translocation	39	0.826096	0.00278526	8888, 26517, 23636, 23511, 10952, 27230, 23279, 10204, 4641, 6238, 4927, 9697, 143244, 25909, 59343, 348995, 10469, 11097, 10440, 9972, 8021, 56993, 23225, 11269, 55308, 9818, 8086, 23165, 5903, 1678, 29928, 7175, 1984, 7095, 92609, 26520, 29927, 10762, 55706	4583	75	13285	1.50735	0.802199	0.0266467	4.01825
GOTERM_BP_DIRECT	GO:0070936~protein K48-linked ubiquitination	27	0.571913	0.00279369	7327, 7326, 10425, 10299, 9025, 54476, 29089, 267, 57162, 11065, 80196, 84447, 81847, 10210, 7337, 7319, 7320, 997, 7321, 54926, 7267, 55658, 7324, 7322, 7323, 51283, 149603	4171	46	11756	1.65434	1	0.22253	5.35093
INTERPRO	IPR003954:RNA recognition motif domain, eukaryote	15	0.317729	0.00280978	22827, 8761, 7307, 27316, 7073, 9584, 494115, 84991, 1153, 132430, 4850, 85437, 4691, 6427, 26986	4344	21	12512	2.05735	0.999998	0.408403	5.17668
INTERPRO	IPR000313:PWWP	14	0.296547	0.00282376	23613, 170394, 114825, 11168, 55777, 84656, 23774, 7468, 2956, 3068, 84717, 64324, 7862, 54904	4344	19	12512	2.12232	0.999998	0.397854	5.2018
GOTERM_BP_DIRECT	GO:0034599~cellular response to oxidative stress	31	0.656641	0.00287935	22850, 7494, 4779, 154807, 5893, 7001, 22933, 488, 2876, 4929, 29957, 2177, 4780, 3304, 6780, 221, 2308, 2309, 140809, 25, 7444, 11315, 5831, 2539, 10935, 83667, 3065, 29920, 23064, 142, 2119	4171	55	11756	1.58861	1	0.225912	5.51063
GOTERM_CC_DIRECT	GO:0036464~cytoplasmic ribonucleoprotein granule	16	0.338911	0.00288597	6780, 1660, 6158, 6175, 8826, 203068, 3192, 6191, 60, 6607, 4691, 5879, 6194, 6128, 26986, 9475	4343	23	12453	1.99469	0.962492	0.0623481	4.5345
GOTERM_CC_DIRECT	GO:0005685~U1 snRNP	13	0.275365	0.00288858	6626, 6628, 6637, 51631, 6636, 6633, 6625, 6634, 55015, 6632, 6631, 55660, 51747	4343	17	12453	2.1927	0.962603	0.0612403	4.53852
UP_SEQ_FEATURE	nucleotide phosphate-binding region:ATP	321	6.79941	0.00291039	146057, 1198, 5230, 8886, 55236, 63922, 29028, 5634, 3480, 11329, 1974, 8737, 2011, 2956, 11325, 4217, 6093, 1186, 204, 204851, 1184, 1182, 55226, 83903, 4216, 6885, 25, 149420, 3716, 25788, 27, 207, 79915, 208, 10097, 546, 31, 7204, 440275, 8243, 1456, 1459, 1453, 55728, 162394, 215, 1452, 1455, 1454, 27183, 25778, 4641, 10730, 1841, 4638, 9879, 22928, 5347, 7046, 8444, 4233, 55661, 8445, 10733,…	4552	820	13191	1.1344	1	0.482287	5.70792
UP_SEQ_FEATURE	repeat:WD 6	77	1.63101	0.00293	7290, 256364, 1477, 987, 22872, 54554, 197335, 55844, 1314, 10399, 25929, 112840, 26608, 54663, 27339, 55339, 55023, 54853, 11091, 79582, 84135, 50717, 9391, 30849, 5928, 55054, 5929, 54468, 11180, 23160, 57521, 80232, 54521, 26118, 64223, 25879, 64326, 1657, 57599, 25886, 134957, 5931, 84231, 8439, 8945, 79269, 5048, 2783, 5520, 11171, 80335, 5822, 51343, 348995, 1130, 6907, 9128, 49856, 57418, …	4552	169	13191	1.32032	1	0.475971	5.74531
GOTERM_BP_DIRECT	GO:0042771~intrinsic apoptotic signaling pathway in response to DNA damage by p53 class mediator	19	0.402457	0.00312734	64782, 29965, 204851, 675, 2033, 4436, 79073, 54541, 7157, 10210, 5366, 27315, 23612, 5527, 26471, 51246, 8445, 23411, 602	4171	29	11756	1.84661	1	0.240118	5.97151
INTERPRO	IPR004088:K Homology domain, type 1	22	0.466003	0.00313168	8880, 9444, 7536, 26057, 8570, 3069, 11103, 5093, 8939, 5094, 22889, 23351, 8165, 51320, 10643, 399664, 10644, 10642, 23404, 56902, 3190, 10657	4344	36	12512	1.76018	1	0.41831	5.75327
SMART	SM00361:RRM_1	15	0.317729	0.0031398	22827, 8761, 7307, 27316, 7073, 9584, 494115, 84991, 1153, 132430, 4850, 85437, 4691, 6427, 26986	2429	21	6919	2.03464	0.894772	0.22134	4.64544
GOTERM_BP_DIRECT	GO:1904874~positive regulation of telomerase RNA localization to Cajal body	12	0.254183	0.00318124	10575, 10576, 908, 92345, 10574, 10856, 55505, 1736, 8607, 6950, 22948, 7203	4171	15	11756	2.25481	1	0.241033	6.07141
GOTERM_CC_DIRECT	GO:0015030~Cajal body	27	0.571913	0.00318744	79664, 10208, 2091, 9343, 7514, 26121, 9221, 9092, 23379, 51808, 9879, 84967, 9129, 9128, 25820, 11325, 90806, 23524, 4863, 1017, 96764, 7307, 51602, 10285, 6631, 6607, 114034	4343	47	12453	1.64721	0.973396	0.0661398	4.99688
UP_SEQ_FEATURE	domain:RRM 3	25	0.529549	0.00332439	4670, 9991, 64783, 2926, 10236, 8761, 10492, 125950, 5725, 3187, 23013, 11338, 9584, 7073, 389677, 1994, 3185, 3191, 132430, 10137, 80004, 29890, 4691, 10658, 26986	4552	43	13191	1.68479	1	0.511026	6.49424
GOTERM_BP_DIRECT	GO:1901216~positive regulation of neuron death	13	0.275365	0.00340852	4217, 1191, 2932, 1965, 25, 54541, 7159, 155061, 2475, 7965, 8301, 1616, 142	4171	17	11756	2.15533	1	0.253113	6.49151
GOTERM_MF_DIRECT	GO:0051020~GTPase binding	17	0.360093	0.00344204	54874, 6455, 6711, 2316, 9545, 3376, 2783, 2803, 5457, 5921, 2782, 3320, 30968, 2023, 10113, 4904, 2058	4211	25	11857	1.91469	0.999358	0.164141	5.79757
UP_KEYWORDS	Mental retardation	115	2.43592	0.00346751	29123, 51574, 4204, 9343, 284098, 3476, 55180, 6491, 54499, 54187, 3340, 10134, 283489, 79791, 55755, 166378, 26005, 51567, 7403, 166379, 79813, 10472, 11284, 5832, 25836, 546, 7552, 55650, 23314, 23126, 5932, 8243, 84295, 27086, 54888, 3897, 10522, 27315, 27316, 8239, 23394, 23325, 4094, 150468, 224, 54872, 26053, 23389, 1778, 7319, 55209, 5813, 10075, 5631, 80153, 2782, 54805, 84919, 56623, 218…	4583	268	13285	1.24387	0.867095	0.0325427	4.97931
GOTERM_CC_DIRECT	GO:0070688~MLL5-L complex	8	0.169456	0.00347346	11329, 8473, 5501, 55904, 5499, 5500, 60, 3054	4343	8	12453	2.86737	0.980798	0.0705837	5.43364
GOTERM_BP_DIRECT	GO:0035666~TRIF-dependent toll-like receptor signaling pathway	16	0.338911	0.00349532	3661, 148022, 329, 330, 7316, 7314, 6233, 7311, 7321, 7187, 8772, 10010, 7099, 8737, 7322, 7323	4171	23	11756	1.9607	1	0.255908	6.65147
GOTERM_BP_DIRECT	GO:1904886~beta-catenin destruction complex disassembly	14	0.296547	0.00351913	7855, 4041, 4040, 1452, 8312, 5499, 2535, 2932, 139285, 324, 23401, 857, 1855, 1499	4171	19	11756	2.0768	1	0.254708	6.69531
INTERPRO	IPR011011:Zinc finger, FYVE/PHD-type	63	1.33446	0.00358735	4302, 1108, 55904, 1107, 79142, 23613, 23469, 7994, 1387, 84678, 29128, 51773, 10155, 5927, 83860, 23503, 8028, 51230, 200576, 54620, 4297, 8193, 58508, 84501, 57661, 546, 9110, 64324, 9682, 10765, 11083, 5252, 79666, 118813, 22992, 6941, 11176, 11177, 23774, 26147, 8897, 22823, 23522, 30827, 55148, 55870, 80196, 7468, 9757, 54904, 57649, 8085, 55632, 8805, 51317, 79960, 9765, 148479, 23338, 2186…	4344	134	12512	1.35417	1	0.450433	6.56379
UP_SEQ_FEATURE	repeat:WD 5	91	1.92756	0.00364294	7290, 256364, 1477, 987, 57175, 22872, 54554, 197335, 1762, 55844, 1314, 10399, 89891, 25929, 112840, 26608, 54663, 27339, 8668, 79084, 55339, 55023, 54853, 79582, 51133, 11091, 84135, 50717, 9391, 30849, 5928, 55054, 5929, 54468, 11180, 23160, 57521, 80232, 23218, 54521, 26118, 64326, 25879, 64223, 57599, 1657, 25886, 134957, 5931, 84231, 8439, 79269, 8945, 5048, 2783, 5520, 11171, 80335, 5822, …	4552	206	13191	1.28012	1	0.534879	7.09504
GOTERM_BP_DIRECT	GO:0006353~DNA-templated transcription, termination	8	0.169456	0.00388722	8458, 5430, 7270, 22803, 10419, 23064, 7978, 6607	4171	8	11756	2.81851	1	0.274486	7.37049
GOTERM_BP_DIRECT	GO:0006310~DNA recombination	35	0.741368	0.00389721	22976, 571, 83444, 3149, 3146, 5893, 10856, 51377, 79840, 641, 80119, 3516, 283899, 6117, 7520, 5885, 10111, 54780, 2067, 4841, 328, 672, 9400, 56160, 8607, 9401, 27301, 3980, 7247, 546, 2547, 23064, 79447, 10432, 9156	4171	65	11756	1.51766	1	0.272304	7.38875
UP_KEYWORDS	Chromosomal rearrangement	118	2.49947	0.00408662	4302, 7750, 4301, 4204, 10342, 22872, 57674, 330, 92521, 79142, 6421, 6491, 57670, 1387, 6418, 607, 605, 602, 8021, 8028, 55752, 25, 1385, 4298, 4297, 5546, 4299, 27125, 23476, 7175, 10006, 8724, 54799, 64324, 23314, 4609, 5252, 8030, 8031, 10272, 27086, 8301, 3321, 285527, 1649, 23118, 4094, 4233, 10801, 595, 23522, 694, 2308, 26053, 2309, 6760, 23389, 10075, 7913, 4300, 79776, 80304, 10600, 235…	4583	277	13285	1.23485	0.907374	0.0376471	5.84366
GOTERM_MF_DIRECT	GO:0004407~histone deacetylase activity	22	0.466003	0.004269	25942, 1108, 5928, 51742, 1107, 10284, 22933, 10362, 53615, 23186, 5978, 64426, 23309, 25855, 51317, 9219, 9112, 3065, 23028, 3066, 23411, 5931	4211	36	11857	1.72072	0.999891	0.195204	7.14248
GOTERM_BP_DIRECT	GO:0006302~double-strand break repair	34	0.720186	0.00430138	79184, 10524, 9319, 571, 5893, 113130, 7415, 79840, 55218, 8467, 9025, 146956, 7520, 5885, 10111, 2067, 675, 672, 2140, 55775, 4436, 3014, 51567, 9401, 3980, 10721, 2237, 9112, 9031, 23064, 83990, 5591, 142, 284071	4171	63	11756	1.5211	1	0.293039	8.12463
UP_SEQ_FEATURE	compositionally biased region:Poly-Asp	40	0.847278	0.00445632	689, 54880, 64710, 682, 91369, 1108, 23258, 6874, 150678, 9669, 641, 124245, 23352, 144108, 1997, 23307, 9879, 29068, 8669, 4212, 64219, 2619, 6433, 23592, 10036, 64083, 3837, 23645, 257364, 9877, 55193, 1616, 7175, 8725, 1657, 546, 23066, 80155, 55320, 23411	4552	79	13191	1.46726	1	0.599469	8.6125
GOTERM_MF_DIRECT	GO:0001046~core promoter sequence-specific DNA binding	21	0.444821	0.00460537	9967, 170959, 6659, 7150, 1106, 9555, 10419, 6667, 4297, 7157, 8204, 463, 5978, 7071, 9112, 4800, 468, 9960, 9975, 23411, 6662	4211	34	11857	1.73912	0.999947	0.204567	7.68432
GOTERM_MF_DIRECT	GO:0003725~double-stranded RNA binding	30	0.635459	0.00461452	3609, 170506, 26065, 3608, 3146, 29102, 8638, 6895, 92140, 10383, 6520, 1665, 1994, 23405, 104, 87, 4154, 6780, 7037, 9208, 22907, 23567, 3326, 10376, 3329, 7431, 4478, 54487, 1213, 9188	4211	54	11857	1.56429	0.999948	0.200775	7.69903
SMART	SM00297:BROMO	24	0.508367	0.00464762	6595, 65980, 6597, 2033, 55870, 29028, 4297, 55193, 2648, 23613, 8805, 23476, 54014, 11176, 11177, 6046, 1387, 23774, 55023, 9031, 2186, 10155, 7862, 10902	2429	41	6919	1.66741	0.964401	0.28362	6.80395
GOTERM_CC_DIRECT	GO:0035770~ribonucleoprotein granule	9	0.190638	0.00467784	55794, 60493, 2926, 23424, 220988, 3191, 22907, 22868, 127933	4343	10	12453	2.58064	0.995139	0.0923036	7.25213
GOTERM_CC_DIRECT	GO:0008250~oligosaccharyltransferase complex	9	0.190638	0.00467784	6184, 1650, 200185, 58505, 84061, 201595, 3703, 6185, 1603	4343	10	12453	2.58064	0.995139	0.0923036	7.25213
GOTERM_BP_DIRECT	GO:0038061~NIK/NF-kappaB signaling	33	0.699004	0.00474802	5717, 5718, 8945, 5710, 330, 9861, 5686, 5713, 5685, 5683, 5716, 9491, 10197, 9040, 5708, 5709, 5706, 329, 5707, 5691, 5704, 5705, 5702, 7316, 5695, 7314, 5531, 5701, 6233, 7311, 5688, 5689, 8454	4171	61	11756	1.52477	1	0.315058	8.93139
INTERPRO	IPR008984:SMAD/FHA domain	26	0.550731	0.00485245	3661, 4301, 3607, 9928, 221937, 283638, 5511, 9859, 6941, 9025, 4090, 7871, 23095, 4091, 79753, 92610, 63971, 57649, 11284, 23187, 54922, 4288, 4088, 4089, 10749, 4086	4344	46	12512	1.62799	1	0.542651	8.77962
INTERPRO	IPR001214:SET domain	26	0.550731	0.00485245	79723, 11108, 10322, 55904, 7799, 10919, 63977, 63976, 2122, 55870, 6839, 23067, 7468, 79918, 9739, 9757, 80854, 54904, 4297, 8085, 79813, 55209, 9869, 58508, 29072, 64324	4344	46	12512	1.62799	1	0.542651	8.77962
GOTERM_CC_DIRECT	GO:0005689~U12-type spliceosomal complex	17	0.360093	0.00491314	6637, 6628, 83443, 6636, 6633, 6634, 23451, 23450, 10992, 1665, 51639, 10262, 11066, 6632, 85437, 79622, 4904	4343	26	12453	1.87482	0.996284	0.0950832	7.60357
UP_KEYWORDS	Neurodegeneration	111	2.3512	0.00493664	22978, 146057, 10342, 5165, 11152, 5538, 9927, 5536, 1822, 25793, 91574, 50717, 22880, 56997, 23503, 9445, 51567, 271, 25978, 7879, 11284, 7345, 5832, 1981, 472, 26353, 54822, 23064, 6607, 5216, 29978, 10528, 10273, 7415, 16, 9907, 1785, 5611, 3897, 6687, 9197, 55526, 23095, 102, 1509, 23111, 23321, 55737, 5428, 26058, 8565, 3735, 7317, 26278, 1778, 10280, 65125, 3329, 5631, 283989, 1639, 23435, …	4583	260	13285	1.23755	0.9436	0.0446138	7.01845
UP_SEQ_FEATURE	domain:SET	25	0.529549	0.00494764	79723, 11108, 10322, 55904, 7799, 10919, 63977, 63976, 55870, 6839, 23067, 7468, 79918, 9739, 9757, 80854, 4297, 54904, 8085, 79813, 55209, 9869, 58508, 29072, 64324	4552	44	13191	1.6465	1	0.629536	9.51767
GOTERM_BP_DIRECT	GO:0006606~protein import into nucleus	29	0.614277	0.0049983	8888, 23636, 10527, 1434, 10526, 23511, 7249, 23633, 10204, 1072, 4927, 5514, 9972, 9670, 103, 10736, 754, 8021, 3837, 2923, 3836, 3839, 3838, 9818, 5901, 5902, 7175, 55705, 10762	4171	52	11756	1.57186	1	0.325538	9.38052
UP_SEQ_FEATURE	domain:KH 3	10	0.21182	0.00500788	8880, 10643, 10644, 8570, 10642, 3069, 5093, 8939, 5094, 3190	4552	12	13191	2.41487	1	0.625732	9.62807
UP_SEQ_FEATURE	DNA-binding region:A.T hook	10	0.21182	0.00500788	25909, 51317, 58508, 6942, 9841, 84733, 84656, 259282, 51230, 23598	4552	12	13191	2.41487	1	0.625732	9.62807
UP_SEQ_FEATURE	zinc finger region:PHD-type	28	0.593095	0.00511503	55904, 22992, 79142, 23613, 23469, 6941, 11176, 11177, 23774, 84678, 29128, 51773, 10155, 30827, 83860, 55870, 51230, 54620, 10743, 8805, 51317, 57661, 546, 148479, 23338, 9031, 7862, 11083	4552	51	13191	1.59097	1	0.625454	9.8241
GOTERM_CC_DIRECT	GO:0000922~spindle pole	50	1.0591	0.00511629	79184, 79000, 805, 29899, 801, 23172, 85378, 22974, 54908, 1663, 4926, 10615, 8502, 9793, 90799, 26524, 55755, 79980, 9113, 25886, 7840, 9055, 23636, 10460, 23255, 4739, 11104, 27183, 9094, 1499, 90417, 9126, 5515, 5347, 3796, 150468, 5905, 3832, 9731, 1063, 51119, 26586, 10210, 994, 1639, 57448, 808, 64793, 891, 10783	4343	103	12453	1.39193	0.997053	0.0971769	7.90598
GOTERM_CC_DIRECT	GO:0031252~cell leading edge	22	0.466003	0.0051987	22848, 117178, 57175, 23513, 7283, 8861, 5048, 25, 9578, 9748, 667, 90102, 7431, 8476, 8729, 5590, 375, 1639, 8826, 4627, 7852, 55604	4343	37	12453	1.70492	0.997318	0.0970503	8.02838
GOTERM_BP_DIRECT	GO:0031398~positive regulation of protein ubiquitination	32	0.677822	0.00524166	55215, 22976, 148022, 10273, 330, 83593, 79142, 7965, 5716, 7189, 25898, 7332, 59343, 139285, 754, 57162, 80279, 54602, 672, 56160, 7466, 857, 3309, 7314, 7337, 23640, 409, 7321, 54778, 8312, 201254, 83932	4171	59	11756	1.52868	1	0.335269	9.81523
INTERPRO	IPR027413:GroEL-like equatorial domain	10	0.21182	0.00524532	10575, 10576, 908, 10574, 6950, 22948, 7203, 79738, 166379, 3329	4344	12	12512	2.40025	1	0.558518	9.45753
GOTERM_BP_DIRECT	GO:0006611~protein export from nucleus	19	0.402457	0.00524714	811, 8021, 23214, 55437, 5310, 57154, 1434, 7514, 2932, 3313, 10204, 5901, 4927, 7040, 29107, 7175, 1984, 11097, 103	4171	30	11756	1.78506	1	0.332494	9.82499
UP_KEYWORDS	Transit peptide	199	4.21521	0.00527689	27069, 51081, 37, 56910, 3712, 1327, 54995, 123263, 84681, 751071, 85476, 92609, 8209, 5250, 23530, 1431, 219, 513, 22921, 51295, 55526, 23395, 6472, 518, 517, 100303755, 515, 728294, 9997, 55739, 522, 134266, 6389, 64087, 81570, 122704, 80308, 92667, 55471, 28977, 27166, 4967, 6391, 30968, 64983, 708, 64981, 81889, 11238, 7978, 3396, 125144, 3954, 64975, 64976, 64979, 65005, 80324, 81892, 7388, …	4583	495	13285	1.16536	0.953764	0.0468959	7.48486
GOTERM_BP_DIRECT	GO:0051085~chaperone mediated protein folding requiring cofactor	9	0.190638	0.00528407	10808, 27433, 3337, 1861, 27348, 3312, 30001, 3336, 3329	4171	10	11756	2.53666	1	0.331378	9.89077
GOTERM_BP_DIRECT	GO:0035195~gene silencing by miRNA	9	0.190638	0.00528407	84962, 57472, 23019, 27327, 57690, 3692, 29883, 9337, 8994	4171	10	11756	2.53666	1	0.331378	9.89077
GOTERM_BP_DIRECT	GO:0006268~DNA unwinding involved in DNA replication	9	0.190638	0.00528407	4173, 5813, 56652, 4175, 4176, 7155, 7153, 3159, 4171	4171	10	11756	2.53666	1	0.331378	9.89077
BIOCARTA	h_mtorPathway:mTOR Signaling Pathway	16	0.338911	0.00530469	5728, 7249, 8661, 8672, 207, 2475, 1982, 6198, 1981, 7248, 5515, 1974, 1975, 1978, 5295, 6194	520	22	1324	1.85175	0.77921	0.395597	6.80546
GOTERM_MF_DIRECT	GO:0070491~repressing transcription factor binding	19	0.402457	0.0053111	51564, 10524, 1487, 26155, 3146, 11218, 51053, 1499, 23613, 11315, 23468, 6929, 80139, 6908, 3065, 6498, 6497, 7091, 4609	4211	30	11857	1.78329	0.999988	0.222987	8.8115
UP_SEQ_FEATURE	domain:Importin N-terminal	11	0.233001	0.00534395	23214, 10527, 10526, 1434, 3837, 7514, 30000, 3843, 9670, 3842, 55705	4552	14	13191	2.27688	1	0.633691	10.2416
UP_SEQ_FEATURE	short sequence motif:"HIGH" region	13	0.275365	0.00537465	8565, 5917, 51520, 51067, 7407, 833, 92935, 3376, 23395, 5859, 124454, 2058, 4141	4552	18	13191	2.09289	1	0.628059	10.2974
GOTERM_CC_DIRECT	GO:0000775~chromosome, centromeric region	29	0.614277	0.00539968	8243, 79723, 10951, 113130, 332, 91687, 387103, 55166, 5515, 9126, 5518, 55355, 5885, 10735, 79003, 55143, 3619, 6839, 1063, 1062, 5525, 1616, 10664, 1059, 5527, 4288, 151246, 23063, 11335	4343	53	12453	1.56894	0.997868	0.0989985	8.32627
UP_SEQ_FEATURE	compositionally biased region:Arg/Ser-rich (RS domain)	12	0.254183	0.00544147	6432, 11338, 6433, 9584, 6430, 6429, 6428, 1659, 9360, 6427, 8683, 6426	4552	16	13191	2.17339	1	0.625032	10.4189
UP_SEQ_FEATURE	short sequence motif:"KMSKS" region	12	0.254183	0.00544147	8565, 51520, 23395, 51067, 7407, 5859, 3376, 124454, 92935, 833, 4141, 2058	4552	16	13191	2.17339	1	0.625032	10.4189
UP_SEQ_FEATURE	repeat:12	20	0.423639	0.00550925	29978, 23636, 4670, 2055, 9500, 2130, 643314, 9818, 8661, 8085, 6238, 10618, 3482, 8148, 4288, 7840, 4134, 5430, 56623, 400566	4552	33	13191	1.75627	1	0.622167	10.5419
GOTERM_CC_DIRECT	GO:0005720~nuclear heterochromatin	15	0.317729	0.00552019	10951, 22933, 6950, 3015, 3008, 23468, 2296, 6304, 11168, 546, 146956, 29128, 10155, 23411, 11335	4343	22	12453	1.95503	0.998142	0.0995	8.50446
GOTERM_MF_DIRECT	GO:0005524~ATP binding	481	10.1885	0.00557208	146057, 5230, 79707, 8886, 55236, 63922, 29028, 3480, 8737, 2011, 2956, 537, 6093, 204, 6782, 204851, 55226, 6885, 149420, 25788, 207, 208, 10721, 10097, 546, 7203, 7204, 8243, 215, 7327, 7326, 27183, 25778, 150465, 10730, 513, 1841, 7332, 22928, 84197, 5347, 8444, 10733, 8445, 1445, 7317, 22907, 51182, 7319, 7320, 6897, 7321, 523, 908, 7324, 10606, 7322, 7323, 10749, 617, 5128, 6595, 5127, 5917,…	4211	1236	11857	1.09576	0.999993	0.228159	9.22505
GOTERM_BP_DIRECT	GO:0006294~nucleotide-excision repair, preincision complex assembly	18	0.381275	0.00560421	7316, 9557, 404672, 7314, 7508, 6233, 7311, 1022, 1069, 8451, 5887, 6117, 8450, 1643, 2968, 1642, 142, 2967	4171	28	11756	1.8119	1	0.344463	10.4592
INTERPRO	IPR000571:Zinc finger, CCCH-type	28	0.593095	0.00561234	10150, 54439, 80742, 56829, 10898, 124245, 255967, 5514, 23091, 79882, 9931, 85463, 11097, 4154, 678, 677, 90957, 55854, 23211, 152992, 64062, 25976, 9877, 7307, 23264, 85451, 4850, 114034	4344	51	12512	1.58134	1	0.5712	10.0865
INTERPRO	IPR013126:Heat shock protein 70 family	11	0.233001	0.00561541	3305, 10525, 3304, 10808, 22824, 6782, 3313, 51182, 3312, 3309, 3308	4344	14	12512	2.26309	1	0.5599	10.0918
INTERPRO	IPR018181:Heat shock protein 70, conserved site	11	0.233001	0.00561541	3305, 10525, 3304, 10808, 22824, 6782, 3313, 51182, 3312, 3309, 3308	4344	14	12512	2.26309	1	0.5599	10.0918
INTERPRO	IPR012337:Ribonuclease H-like domain	31	0.656641	0.00562568	55133, 124751, 90459, 3726, 5612, 55218, 6830, 9204, 5422, 58486, 80004, 246243, 57455, 79830, 64782, 5428, 5424, 5426, 10535, 5980, 79736, 81875, 10721, 100381270, 9889, 10594, 9189, 112479, 29883, 9337, 114034	4344	58	12512	1.53947	1	0.549475	10.1093
UP_SEQ_FEATURE	repeat:2	61	1.2921	0.00574285	2055, 11054, 6598, 800, 8570, 85378, 1105, 9829, 55740, 6421, 22905, 10618, 3482, 55814, 55603, 400566, 9500, 1893, 3097, 643314, 10236, 23645, 9818, 9295, 89887, 7840, 4691, 10762, 402055, 29978, 23636, 8554, 2130, 8030, 4775, 6634, 7414, 310, 1786, 6238, 8148, 7629, 6908, 4134, 4130, 11135, 6432, 4670, 6760, 7156, 7428, 5903, 8085, 57082, 5528, 10024, 4288, 55677, 7716, 9188, 56623	4552	132	13191	1.33916	1	0.630201	10.9647
GOTERM_CC_DIRECT	GO:0005753~mitochondrial proton-transporting ATP synthase complex	13	0.275365	0.00592457	506, 509, 9551, 498, 10105, 513, 522, 521, 10632, 518, 517, 93974, 515	4343	18	12453	2.07088	0.99883	0.104758	9.1
GOTERM_CC_DIRECT	GO:0005686~U2 snRNP	13	0.275365	0.00592457	6637, 6628, 6629, 83443, 6633, 6634, 10291, 23451, 10992, 8175, 51639, 27336, 6632	4343	18	12453	2.07088	0.99883	0.104758	9.1
GOTERM_BP_DIRECT	GO:0045931~positive regulation of mitotic cell cycle	17	0.360093	0.00595422	26073, 675, 5781, 332, 5048, 4193, 25, 351, 983, 994, 6198, 440, 23326, 5586, 1978, 891, 1845	4171	26	11756	1.84287	1	0.358456	11.0767
GOTERM_CC_DIRECT	GO:0071004~U2-type prespliceosome	12	0.254183	0.00596535	8175, 6628, 11338, 6637, 51631, 6625, 10291, 55015, 23451, 6631, 55660, 51747	4343	16	12453	2.15053	0.998883	0.103833	9.15986
GOTERM_BP_DIRECT	GO:0006986~response to unfolded protein	23	0.487185	0.00597105	3305, 10808, 22824, 3301, 3337, 3312, 3326, 3308, 3336, 9927, 3329, 64224, 23197, 3320, 1649, 23190, 27348, 201595, 871, 11080, 7009, 7057, 7873	4171	39	11756	1.6622	1	0.356188	11.1063
GOTERM_BP_DIRECT	GO:0075733~intracellular transport of virus	27	0.571913	0.00605845	23636, 23511, 7514, 23279, 4927, 348995, 11097, 9972, 8021, 23225, 3837, 3836, 3839, 3838, 9818, 7316, 8086, 7314, 5901, 51160, 23165, 6233, 7311, 5903, 7175, 10762, 55706	4171	48	11756	1.58541	1	0.357289	11.2598
UP_SEQ_FEATURE	repeat:13	19	0.402457	0.00606821	23636, 4670, 2055, 9500, 2130, 643314, 9818, 8661, 8085, 6238, 10618, 3482, 8148, 4288, 7840, 4134, 5430, 56623, 400566	4552	31	13191	1.7761	1	0.643389	11.5504
SMART	SM00088:PINT	11	0.233001	0.00611985	5717, 5718, 2873, 9318, 8533, 5709, 50813, 8661, 9861, 3646, 10480	2429	14	6919	2.23811	0.987664	0.329392	8.8674
GOTERM_CC_DIRECT	GO:0030176~integral component of endoplasmic reticulum membrane	46	0.97437	0.00616182	57171, 7494, 10269, 2131, 23204, 84912, 51000, 9986, 166929, 118813, 54020, 51009, 55161, 3895, 83460, 6238, 26608, 10299, 54499, 8818, 28972, 1388, 92579, 10488, 22926, 10113, 267, 550, 259230, 57142, 54872, 22845, 10237, 23141, 79071, 84447, 1798, 7466, 3309, 1717, 84236, 51604, 51283, 84255, 113419, 29927	4343	94	12453	1.40318	0.999107	0.105466	9.44771
SMART	SM00293:PWWP	13	0.275365	0.00625932	23613, 170394, 114825, 11168, 23774, 84656, 7468, 2956, 3068, 84717, 64324, 7862, 54904	2429	18	6919	2.05725	0.988844	0.312468	9.06066
GOTERM_BP_DIRECT	GO:0000070~mitotic sister chromatid segregation	16	0.338911	0.00628428	8243, 11130, 51203, 3833, 25936, 79980, 9700, 9702, 84861, 90417, 7756, 10615, 9184, 5347, 10051, 79003	4171	24	11756	1.87901	1	0.364767	11.6553
GOTERM_BP_DIRECT	GO:0045893~positive regulation of transcription, DNA-templated	183	3.8763	0.00649792	3725, 4041, 688, 4040, 6018, 3148, 4204, 2149, 6874, 29028, 221937, 2295, 2296, 8322, 8324, 1387, 10488, 55023, 65056, 51773, 10155, 6495, 602, 7546, 675, 672, 3207, 55755, 3091, 8939, 1385, 4192, 4297, 8312, 7552, 23066, 149603, 6601, 64324, 7555, 4609, 6182, 23636, 10524, 8554, 4779, 4775, 8031, 55729, 8945, 1785, 10522, 8301, 25805, 1997, 7040, 4800, 1649, 51804, 23326, 4090, 1999, 7046, 23522…	4171	442	11756	1.16694	1	0.371458	12.0279
INTERPRO	IPR020472:G-protein beta WD-40 repeat	40	0.847278	0.00654512	1477, 54554, 8945, 5048, 1314, 10399, 2783, 11171, 25929, 26608, 27339, 80335, 5822, 9128, 6907, 26190, 11137, 57418, 11091, 79582, 55003, 83743, 10885, 9276, 5928, 55054, 27097, 80232, 9373, 54521, 26118, 64326, 64223, 2782, 54014, 57599, 25886, 9184, 5931, 84231	4344	80	12512	1.44015	1	0.59375	11.6666
GOTERM_BP_DIRECT	GO:0032465~regulation of cytokinesis	15	0.317729	0.00657631	5300, 10807, 675, 805, 30849, 201163, 51100, 801, 9738, 6790, 9903, 1069, 808, 57448, 55660	4171	22	11756	1.92171	1	0.371945	12.1643
GOTERM_BP_DIRECT	GO:0051439~regulation of ubiquitin-protein ligase activity involved in mitotic cell cycle	15	0.317729	0.00657631	8881, 11065, 1017, 26271, 983, 996, 7321, 7324, 51343, 5347, 51434, 51433, 29882, 891, 51529	4171	22	11756	1.92171	1	0.371945	12.1643
GOTERM_CC_DIRECT	GO:0005783~endoplasmic reticulum	266	5.6344	0.00663592	7494, 1191, 23516, 51371, 79803, 8125, 79087, 26608, 55379, 54499, 10613, 22901, 1727, 10488, 7162, 6780, 6782, 55851, 23645, 25, 23509, 1717, 1718, 824, 7327, 5355, 1595, 114882, 5352, 5611, 821, 5351, 55922, 92140, 22926, 6748, 51293, 55666, 819, 6746, 23392, 201595, 7184, 6745, 65078, 811, 813, 54872, 328, 10313, 10491, 10492, 81579, 51283, 23385, 10749, 1471, 10598, 7057, 987, 10857, 10952, 7…	4343	673	12453	1.13332	0.999481	0.111464	10.1388
GOTERM_BP_DIRECT	GO:0051865~protein autoubiquitination	26	0.550731	0.00666856	11060, 10206, 672, 6737, 10273, 57674, 81847, 4193, 55182, 7319, 7337, 7189, 7320, 25898, 7186, 10277, 9025, 7322, 7323, 29128, 1643, 51283, 29089, 149603, 4850, 267	4171	46	11756	1.59307	1	0.373032	12.3244
GOTERM_CC_DIRECT	GO:0005635~nuclear envelope	62	1.31328	0.00669182	1192, 23511, 1861, 23279, 4001, 23468, 55379, 124491, 9798, 11097, 23225, 581, 9818, 23, 23165, 4259, 5590, 7175, 56894, 9112, 55326, 23411, 55705, 55706, 11335, 23636, 10424, 1434, 10526, 23399, 7514, 6240, 5048, 663, 310, 665, 55161, 667, 348995, 22926, 5422, 23190, 11270, 26012, 7112, 5905, 57142, 4864, 3837, 11269, 10682, 128866, 1063, 8086, 10280, 5902, 5903, 1639, 6720, 10456, 27348, 142	4343	134	12453	1.32669	0.999513	0.110722	10.22
UP_SEQ_FEATURE	compositionally biased region:Poly-Glu	164	3.47384	0.00669446	9240, 800, 1108, 10291, 1107, 10992, 4898, 79142, 334, 10919, 22904, 1387, 23301, 55023, 2956, 51773, 11325, 400566, 26155, 9919, 3204, 84946, 83860, 10536, 5546, 79813, 1981, 149371, 10914, 7175, 57661, 546, 5934, 6601, 5932, 23786, 10525, 57553, 56987, 3216, 10526, 124808, 10322, 57223, 23199, 10425, 10427, 23195, 5822, 10946, 4638, 1130, 1649, 9166, 259282, 139285, 6949, 55002, 25800, 4236, 28…	4552	403	13191	1.17927	1	0.672547	12.6674
GOTERM_BP_DIRECT	GO:0006336~DNA replication-independent nucleosome assembly	11	0.233001	0.00670157	7290, 25842, 55723, 3021, 5928, 546, 8364, 4678, 29855, 8520, 8367	4171	14	11756	2.21454	1	0.371513	12.3817
GOTERM_BP_DIRECT	GO:0007050~cell cycle arrest	60	1.27092	0.00671871	55437, 4853, 55904, 7249, 9927, 2475, 55544, 5325, 220042, 6498, 10657, 2619, 8872, 22846, 23645, 11180, 25, 57521, 5036, 1982, 1718, 64223, 5494, 7248, 5496, 8454, 9585, 84897, 8453, 472, 8451, 84687, 4088, 440275, 4609, 6934, 5310, 6300, 10670, 6794, 1027, 28956, 9092, 7040, 1031, 5565, 1647, 1649, 3659, 7046, 811, 323, 4436, 9238, 324, 127933, 7157, 463, 1022, 7057	4171	127	11756	1.33158	1	0.369332	12.4114
GOTERM_BP_DIRECT	GO:0048025~negative regulation of mRNA splicing, via spliceosome	14	0.296547	0.00680525	1859, 27316, 6432, 11338, 6433, 79171, 6429, 10284, 3181, 3190, 708, 8683, 22985, 5725	4171	20	11756	1.97296	1	0.370173	12.5613
GOTERM_BP_DIRECT	GO:0007051~spindle organization	12	0.254183	0.00692314	79000, 9212, 90417, 10615, 1107, 3832, 28989, 7272, 9793, 5902, 259266, 6790	4171	16	11756	2.11388	1	0.372327	12.7651
INTERPRO	IPR027417:P-loop containing nucleoside triphosphate hydrolase	277	5.8674	0.00696727	10890, 8886, 84273, 63922, 159, 29028, 22904, 1974, 2956, 11325, 4218, 204, 23, 55752, 25788, 79915, 7879, 89845, 10721, 546, 85476, 400, 402, 8243, 55728, 215, 162394, 27183, 23011, 4641, 10730, 1841, 9879, 221079, 55665, 58480, 55661, 58477, 10212, 3833, 22907, 3832, 285598, 3835, 55206, 1062, 80205, 221092, 523, 4627, 79631, 64792, 4628, 10749, 9188, 617, 81570, 6595, 4355, 6597, 10856, 5911, …	4344	706	12512	1.13009	1	0.606111	12.373
GOTERM_MF_DIRECT	GO:0042800~histone methyltransferase activity (H3-K4 specific)	12	0.254183	0.00698312	30827, 80335, 58508, 55870, 55904, 23067, 5929, 9739, 9757, 4297, 11091, 8085	4211	16	11857	2.11179	1	0.272308	11.4305
INTERPRO	IPR000626:Ubiquitin	26	0.550731	0.0069925	29978, 4738, 10291, 59286, 8638, 92181, 10616, 2197, 6905, 84196, 29128, 6612, 5887, 6613, 5886, 8266, 79622, 7316, 26278, 7314, 84901, 6233, 7311, 64224, 219899, 56061	4344	47	12512	1.59335	1	0.597113	12.415
UP_SEQ_FEATURE	repeat:1	61	1.2921	0.00699897	2055, 11054, 6598, 800, 8570, 85378, 1105, 9829, 55740, 6421, 22905, 10618, 3482, 55603, 400566, 9500, 1893, 3097, 643314, 23645, 9818, 9295, 89887, 7840, 4691, 10762, 402055, 29978, 23636, 8554, 2130, 8030, 4775, 6634, 7414, 310, 1786, 6238, 8148, 7629, 6908, 4134, 4130, 11135, 6432, 4670, 6760, 7156, 7428, 8661, 5903, 8085, 57082, 5528, 10024, 4288, 55677, 7716, 5430, 9188, 56623	4552	133	13191	1.32909	1	0.682016	13.2057
GOTERM_MF_DIRECT	GO:0051082~unfolded protein binding	46	0.97437	0.00701112	4043, 3998, 10856, 3313, 3337, 5479, 1861, 3312, 6950, 5478, 56886, 10294, 3336, 821, 23195, 6687, 10383, 5203, 3320, 4676, 10131, 7184, 3305, 811, 3304, 10036, 3301, 23386, 4869, 11140, 80273, 84447, 3309, 3326, 22948, 3329, 10575, 10576, 134266, 908, 7265, 10574, 11080, 871, 7203, 10728	4211	93	11857	1.39272	1	0.26839	11.4737
GOTERM_BP_DIRECT	GO:0042769~DNA damage response, detection of DNA damage	21	0.444821	0.00710739	3301, 5424, 6659, 8091, 7316, 64949, 7314, 6188, 6233, 7311, 7320, 11284, 5985, 8451, 6117, 8450, 5111, 1642, 142, 7398, 51514	4171	35	11756	1.69111	1	0.377202	13.0827
BIOCARTA	h_pitx2Pathway:Multi-step Regulation of Transcription by Pitx2	12	0.254183	0.00753218	10524, 8312, 1387, 2033, 8861, 2932, 3065, 324, 8295, 1855, 1499, 5469	520	15	1324	2.03692	0.883194	0.415389	9.53335
BIOCARTA	h_eifPathway:Eukaryotic protein translation	12	0.254183	0.00753218	1982, 1983, 1981, 1974, 1938, 10209, 1968, 8661, 1965, 8894, 8672, 3692	520	15	1324	2.03692	0.883194	0.415389	9.53335
KEGG_PATHWAY	hsa03050:Proteasome	24	0.508367	0.00775431	5717, 5718, 5708, 5709, 5706, 5707, 5691, 5704, 5705, 5710, 51371, 5702, 9861, 5713, 5686, 5695, 7979, 5685, 5701, 5683, 5688, 9491, 5689, 10197	1804	40	4809	1.59945	0.89539	0.17149	9.83122
GOTERM_BP_DIRECT	GO:0007062~sister chromatid cohesion	47	0.995552	0.00790121	8243, 55920, 11130, 7514, 113130, 332, 5048, 22919, 91687, 54908, 23279, 348235, 25909, 1663, 55166, 348995, 9126, 5347, 5885, 3796, 9793, 79003, 10735, 55143, 5905, 3619, 699, 79172, 11243, 64105, 81930, 25936, 3835, 1063, 1062, 5903, 79980, 57082, 2491, 9212, 114799, 5501, 9184, 23063, 151246, 11331, 23332	4171	96	11756	1.37989	1	0.406411	14.4386
GOTERM_BP_DIRECT	GO:0045454~cell redox homeostasis	31	0.656641	0.00797781	10130, 9601, 7295, 23530, 10549, 7001, 7296, 83442, 51061, 2876, 1649, 64359, 4780, 56255, 374354, 169714, 51218, 79770, 10539, 2923, 9997, 328, 1738, 5034, 30001, 5052, 51075, 9588, 81542, 10935, 9131	4171	58	11756	1.50644	1	0.406447	14.5684
GOTERM_BP_DIRECT	GO:0034644~cellular response to UV	24	0.508367	0.00807386	26155, 7528, 55031, 5424, 2033, 10856, 22890, 581, 2072, 1965, 150678, 51499, 7157, 84236, 9212, 9683, 1387, 468, 23028, 83695, 5111, 5295, 440275, 4609	4171	42	11756	1.61058	1	0.407233	14.7308
INTERPRO	IPR015943:WD40/YVTN repeat-like-containing domain	122	2.5842	0.00812699	7290, 256364, 1477, 57175, 22872, 11152, 23654, 55844, 1314, 112840, 26608, 27339, 8668, 79084, 55023, 79582, 11091, 8021, 84135, 50717, 55054, 56995, 5361, 23644, 80232, 54521, 64326, 64223, 134957, 23129, 55558, 5931, 8439, 23398, 8945, 5048, 2783, 2976, 5822, 91833, 1130, 11137, 1643, 49856, 10113, 57418, 4233, 1642, 253769, 51514, 55003, 83743, 10885, 8662, 27097, 9373, 2782, 23005, 9184, 233…	4344	291	12512	1.20755	1	0.642502	14.2862
UP_SEQ_FEATURE	domain:KH 4	7	0.148274	0.00829921	8880, 10643, 10644, 8570, 10642, 3069, 8939	4552	7	13191	2.89785	1	0.736784	15.4688
UP_SEQ_FEATURE	site:Interaction with phosphoserine on interacting protein	7	0.148274	0.00829921	10971, 7529, 2810, 7534, 7533, 7532, 7531	4552	7	13191	2.89785	1	0.736784	15.4688
UP_SEQ_FEATURE	compositionally biased region:Poly-Ser	161	3.41029	0.00834801	4302, 256364, 96459, 3720, 84733, 159195, 29028, 79990, 2295, 23468, 22906, 2296, 22903, 1388, 1822, 64689, 220042, 171023, 11325, 79596, 51564, 677, 3207, 23269, 9546, 8028, 113263, 4193, 25, 6885, 4298, 54620, 27, 79915, 4299, 6879, 23476, 7175, 546, 134957, 23066, 58496, 7204, 79595, 23060, 23580, 4779, 8030, 7799, 9360, 56888, 9774, 9776, 22926, 9778, 152485, 1460, 51512, 8443, 6949, 10735, 9…	4552	397	13191	1.1752	1	0.732513	15.5527
GOTERM_BP_DIRECT	GO:1904837~beta-catenin-TCF complex assembly	19	0.402457	0.00840686	10524, 2033, 6597, 5929, 79577, 8607, 1499, 8085, 1387, 4221, 8364, 3065, 607, 8295, 7090, 7091, 8367, 4609, 6934	4171	31	11756	1.72747	1	0.416974	15.2918
INTERPRO	IPR009000:Translation elongation/initiation factor/Ribosomal, beta-barrel	16	0.338911	0.00849353	6122, 9343, 1938, 92345, 2935, 1968, 7284, 1915, 6165, 16, 9669, 54433, 9567, 10767, 85476, 79631	4344	25	12512	1.84339	1	0.648983	14.8826
INTERPRO	IPR023410:14-3-3 domain	7	0.148274	0.00858414	10971, 7529, 2810, 7534, 7533, 7532, 7531	4344	7	12512	2.88029	1	0.643352	15.0294
INTERPRO	IPR023409:14-3-3 protein, conserved site	7	0.148274	0.00858414	10971, 7529, 2810, 7534, 7533, 7532, 7531	4344	7	12512	2.88029	1	0.643352	15.0294
INTERPRO	IPR000308:14-3-3 protein	7	0.148274	0.00858414	10971, 7529, 2810, 7534, 7533, 7532, 7531	4344	7	12512	2.88029	1	0.643352	15.0294
UP_KEYWORDS	Elongation factor	15	0.317729	0.00864525	1936, 6829, 1938, 1937, 7284, 1915, 143244, 10767, 10102, 84337, 1984, 85476, 79631, 79921, 6924	4583	23	13285	1.89049	0.993557	0.0746759	11.986
GOTERM_CC_DIRECT	GO:0000243~commitment complex	7	0.148274	0.0088021	11338, 6625, 6634, 11066, 55015, 6632, 6631	4343	7	12453	2.86737	0.999957	0.141161	13.234
BIOCARTA	h_igf1mtorPathway:Skeletal muscle hypertrophy is regulated via AKT/mTOR pathway	14	0.296547	0.00908816	3480, 5728, 6198, 5515, 1968, 2932, 1978, 1965, 8894, 3636, 5295, 207, 6194, 2475	520	19	1324	1.87611	0.925192	0.404627	11.3949
SMART	SM00101:14_3_3	7	0.148274	0.00910954	10971, 7529, 2810, 7534, 7533, 7532, 7531	2429	7	6919	2.8485	0.998573	0.395905	12.9271
INTERPRO	IPR000253:Forkhead-associated (FHA) domain	20	0.423639	0.00912796	4301, 79753, 92610, 3607, 63971, 9928, 283638, 221937, 57649, 5511, 11284, 23187, 9859, 6941, 9025, 54922, 4288, 7871, 10749, 23095	4344	34	12512	1.69429	1	0.656719	15.9056
INTERPRO	IPR013766:Thioredoxin domain	20	0.423639	0.00912796	169714, 79770, 10130, 10539, 9601, 2923, 9997, 7295, 7001, 10549, 5034, 5052, 51075, 9588, 51061, 81542, 10935, 64359, 56255, 374354	4344	34	12512	1.69429	1	0.656719	15.9056
GOTERM_MF_DIRECT	GO:0061631~ubiquitin conjugating enzyme activity	18	0.381275	0.00921532	11065, 7327, 7326, 55585, 7319, 7320, 997, 7321, 54926, 7332, 7324, 7322, 7336, 63893, 7323, 29089, 57448, 51465	4211	29	11857	1.74769	1	0.331567	14.8166
UP_SEQ_FEATURE	domain:SAP	14	0.296547	0.00936738	55749, 8554, 57496, 51588, 90459, 10992, 11100, 22985, 9063, 221092, 9667, 7913, 3192, 2547	4552	21	13191	1.9319	1	0.766482	17.286
GOTERM_CC_DIRECT	GO:0017053~transcriptional repressor complex	27	0.571913	0.00938915	3725, 25942, 3146, 57708, 23468, 23013, 6907, 6498, 6497, 10443, 51132, 595, 1487, 9611, 7529, 63976, 55122, 2672, 57649, 23186, 5978, 6670, 161882, 6601, 3068, 5932, 55635	4343	50	12453	1.54838	0.999978	0.147811	14.0555
KEGG_PATHWAY	hsa04932:Non-alcoholic fatty liver disease (NAFLD)	64	1.35564	0.00948269	3725, 7494, 1351, 1350, 29796, 840, 4697, 22877, 6391, 1349, 79602, 1347, 4217, 581, 1327, 51094, 207, 208, 7132, 4695, 4696, 1337, 7388, 4694, 5879, 7386, 7384, 2932, 4702, 10975, 4700, 4731, 27089, 5465, 6945, 7040, 7186, 5565, 1649, 9167, 9021, 126328, 9377, 3570, 4728, 4716, 4723, 4713, 4726, 1965, 4725, 4715, 8660, 440567, 4710, 355, 54205, 55967, 6389, 468, 3667, 6720, 5295, 5296	1804	132	4809	1.29248	0.936904	0.191477	11.897
GOTERM_CC_DIRECT	GO:0005790~smooth endoplasmic reticulum	15	0.317729	0.00961786	811, 10525, 10961, 10549, 5332, 57704, 5663, 84447, 5479, 5611, 3309, 821, 351, 7871, 4642	4343	23	12453	1.87003	0.999983	0.149093	14.3735
GOTERM_CC_DIRECT	GO:0032993~protein-DNA complex	15	0.317729	0.00961786	988, 5927, 3207, 1108, 8091, 6667, 6666, 1499, 5469, 4802, 1388, 4800, 1649, 4780, 6934	4343	23	12453	1.87003	0.999983	0.149093	14.3735
GOTERM_CC_DIRECT	GO:0010494~cytoplasmic stress granule	20	0.423639	0.00962841	6780, 26065, 8570, 8761, 55239, 1965, 57532, 7073, 1656, 9698, 1654, 10642, 1153, 5936, 10146, 4076, 4904, 4154, 26986, 11273	4343	34	12453	1.68669	0.999983	0.147249	14.3882
GOTERM_CC_DIRECT	GO:0016605~PML body	44	0.932006	0.00966621	7290, 7750, 8554, 55159, 29855, 1025, 641, 2475, 2872, 23468, 5987, 59343, 7994, 6612, 6117, 26036, 6498, 6613, 6497, 10114, 7874, 81603, 9994, 5728, 204851, 79677, 7156, 51588, 51567, 7157, 3297, 10210, 9063, 11315, 1616, 9683, 6304, 6670, 546, 5598, 3646, 6427, 23411, 6934	4343	91	12453	1.38642	0.999984	0.145836	14.4406
PIR_SUPERFAMILY	PIRSF000868:14-3-3 protein	7	0.148274	0.00970528	10971, 7529, 2810, 7534, 7533, 7532, 7531	454	7	1273	2.80396	0.97183	0.97183	12.5647
GOTERM_MF_DIRECT	GO:1990446~U1 snRNP binding	7	0.148274	0.009739	6626, 6637, 6633, 6625, 6634, 6632, 6631	4211	7	11857	2.81572	1	0.341181	15.5931
GOTERM_MF_DIRECT	GO:0030235~nitric-oxide synthase regulator activity	7	0.148274	0.009739	805, 3320, 1956, 801, 808, 3326, 207	4211	7	11857	2.81572	1	0.341181	15.5931
GOTERM_MF_DIRECT	GO:1990247~N6-methyladenosine-containing RNA binding	7	0.148274	0.009739	54915, 253943, 3183, 64848, 91746, 51441, 3181	4211	7	11857	2.81572	1	0.341181	15.5931
GOTERM_MF_DIRECT	GO:0008312~7S RNA binding	7	0.148274	0.009739	6726, 6727, 6728, 23404, 6729, 6731, 6730	4211	7	11857	2.81572	1	0.341181	15.5931
GOTERM_BP_DIRECT	GO:0051028~mRNA transport	22	0.466003	0.00976249	8888, 9444, 9939, 677, 9908, 7514, 8570, 55421, 144983, 4641, 10204, 7884, 10128, 25909, 143244, 6830, 10643, 10644, 59343, 10642, 220988, 55677	4171	38	11756	1.63177	1	0.462672	17.5395
GOTERM_BP_DIRECT	GO:0002479~antigen processing and presentation of exogenous peptide antigen via MHC class I, TAP-dependent	29	0.614277	0.00976977	5717, 5718, 5710, 9861, 5686, 5713, 5685, 5683, 5716, 9491, 10197, 3107, 3134, 3133, 3105, 5708, 5709, 5706, 5707, 5704, 5691, 5705, 5702, 5695, 3693, 5701, 5688, 5689, 567	4171	54	11756	1.51364	1	0.459851	17.5514
GOTERM_BP_DIRECT	GO:0070301~cellular response to hydrogen peroxide	29	0.614277	0.00976977	5536, 6188, 983, 388, 5111, 4780, 1545, 1894, 4217, 2395, 51526, 301, 328, 2308, 59338, 4193, 25, 3297, 10105, 11315, 3066, 231, 9314, 1471, 23064, 6778, 5598, 9131, 23411	4171	54	11756	1.51364	1	0.459851	17.5514
BIOCARTA	h_g2Pathway:Cell Cycle: G2/M Checkpoint	16	0.338911	0.00982229	10971, 2033, 672, 7465, 4193, 7157, 983, 997, 994, 995, 1647, 5347, 472, 7533, 891, 5591	520	23	1324	1.77124	0.939392	0.373258	12.2608
UP_SEQ_FEATURE	repeat:4	42	0.889642	0.00985832	23636, 29978, 11054, 2055, 2130, 8570, 6634, 85378, 1786, 55740, 6238, 22905, 10618, 8148, 3482, 55814, 55603, 4134, 4130, 11135, 400566, 6432, 4670, 9500, 3097, 643314, 23645, 9818, 7428, 8661, 9295, 8085, 5528, 10024, 4288, 89887, 7840, 7716, 5430, 56623, 4691, 10762	4552	87	13191	1.39896	1	0.777917	18.1087
INTERPRO	IPR003034:SAP domain	14	0.296547	0.00991041	55749, 8554, 57496, 51588, 90459, 10992, 11100, 22985, 9063, 221092, 9667, 7913, 3192, 2547	4344	21	12512	1.9202	1	0.677932	17.1513
GOTERM_BP_DIRECT	GO:0050821~protein stabilization	58	1.22855	0.00991936	23032, 1191, 6659, 5479, 483, 481, 3920, 3054, 22848, 3304, 11235, 60485, 11040, 4194, 11140, 84447, 1385, 22948, 1855, 10575, 10576, 7248, 84897, 3916, 10574, 4088, 11331, 7203, 5216, 9531, 2033, 2316, 6400, 6950, 84327, 6789, 3320, 2597, 51512, 7874, 9770, 811, 5728, 5300, 5245, 7428, 10491, 7466, 3326, 3329, 23560, 7320, 11315, 7756, 908, 58525, 80155, 5295	4171	124	11756	1.31833	1	0.461895	17.7959
UP_SEQ_FEATURE	active site:Glycyl thioester intermediate	33	0.699004	0.00994599	64750, 57154, 55236, 7327, 7326, 55585, 7332, 63893, 29089, 9320, 9040, 9690, 51465, 26091, 11060, 10054, 11065, 7317, 7337, 7319, 79876, 10075, 7320, 997, 7321, 54926, 7324, 7322, 89910, 7323, 57448, 51506, 25831	4552	65	13191	1.47121	1	0.775172	18.2548
INTERPRO	IPR004087:K Homology domain	19	0.402457	0.0101223	8880, 9444, 7536, 26057, 8570, 3069, 11103, 5093, 8939, 5094, 8165, 51320, 10643, 399664, 10644, 10642, 56902, 3190, 10657	4344	32	12512	1.71017	1	0.676896	17.4855
UP_SEQ_FEATURE	repeat:9	25	0.529549	0.0101682	29978, 23636, 2055, 2130, 85378, 55740, 6238, 10618, 8148, 3482, 4134, 4130, 400566, 9500, 4670, 3097, 643314, 9818, 8661, 9295, 8085, 4288, 7840, 5430, 56623	4552	46	13191	1.57492	1	0.776981	18.6239
UP_SEQ_FEATURE	repeat:HEAT 3	25	0.529549	0.0101682	64151, 7514, 3843, 8672, 3842, 2475, 5518, 23116, 9670, 23392, 9793, 55832, 10985, 26953, 3837, 30849, 23451, 30000, 54919, 22820, 25836, 23066, 9989, 23332, 3064	4552	46	13191	1.57492	1	0.776981	18.6239
UP_SEQ_FEATURE	domain:Chromo 2	8	0.169456	0.0102165	57680, 84181, 1108, 1106, 1107, 1105, 55636, 80205	4552	9	13191	2.57586	1	0.773032	18.7039
INTERPRO	IPR017998:Chaperone tailless complex polypeptide 1 (TCP-1)	8	0.169456	0.0106031	10575, 10576, 908, 10574, 6950, 22948, 7203, 3329	4344	9	12512	2.56026	1	0.685323	18.2395
INTERPRO	IPR027410:TCP-1-like chaperonin intermediate domain	8	0.169456	0.0106031	10575, 10576, 908, 10574, 200576, 6950, 22948, 7203	4344	9	12512	2.56026	1	0.685323	18.2395
INTERPRO	IPR009071:High mobility group (HMG) box domain	22	0.466003	0.0108704	56987, 3148, 3149, 3146, 6659, 1107, 7468, 115098, 23152, 10363, 10362, 6666, 55193, 8085, 11169, 58508, 7343, 7019, 6749, 10042, 6662, 6934	4344	39	12512	1.62478	1	0.686067	18.6557
GOTERM_CC_DIRECT	GO:0000812~Swr1 complex	8	0.169456	0.0108997	10524, 81611, 57634, 10856, 10467, 8607, 8295, 10902	4343	9	12453	2.54878	0.999996	0.160839	16.1358
GOTERM_CC_DIRECT	GO:0000276~mitochondrial proton-transporting ATP synthase complex, coupling factor F(o)	8	0.169456	0.0108997	522, 521, 23041, 10632, 518, 517, 9551, 515	4343	9	12453	2.54878	0.999996	0.160839	16.1358
SMART	SM00513:SAP	14	0.296547	0.0109223	55749, 8554, 57496, 51588, 90459, 10992, 11100, 22985, 9063, 221092, 9667, 7913, 3192, 2547	2429	21	6919	1.899	0.999615	0.429745	15.3057
GOTERM_BP_DIRECT	GO:0043123~positive regulation of I-kappaB kinase/NF-kappaB signaling	63	1.33446	0.0110642	1936, 10206, 10342, 148022, 2149, 56674, 56829, 330, 5536, 222068, 10616, 84962, 8772, 8837, 387, 8737, 6398, 1894, 57162, 11043, 1893, 11040, 124583, 6885, 25, 7314, 7311, 7132, 10769, 5494, 23476, 54862, 23636, 57153, 3661, 2316, 57708, 22954, 1499, 7189, 2697, 92140, 7188, 79971, 8795, 23118, 3654, 4055, 23390, 81603, 6275, 26057, 57506, 54602, 329, 11214, 7316, 6233, 2534, 51246, 9516, 6574, …	4171	137	11756	1.2961	1	0.496108	19.6444
UP_SEQ_FEATURE	DNA-binding region:A.T hook 1	9	0.190638	0.0110929	4204, 11176, 55870, 10847, 8091, 57479, 3159, 9757, 4297	4552	11	13191	2.37097	1	0.795029	20.1432
UP_SEQ_FEATURE	DNA-binding region:A.T hook 2	9	0.190638	0.0110929	4204, 11176, 55870, 10847, 8091, 57479, 3159, 9757, 4297	4552	11	13191	2.37097	1	0.795029	20.1432
UP_SEQ_FEATURE	repeat:HEAT 11	9	0.190638	0.0110929	10985, 5518, 23066, 23451, 30000, 9989, 9670, 23392, 55832	4552	11	13191	2.37097	1	0.795029	20.1432
INTERPRO	IPR001494:Importin-beta, N-terminal	12	0.254183	0.0111823	23214, 10527, 10526, 1434, 3837, 7514, 30000, 3843, 9670, 3842, 55705, 11260	4344	17	12512	2.03315	1	0.688237	19.1389
KEGG_PATHWAY	hsa03060:Protein export	15	0.317729	0.0113553	5018, 28972, 6726, 11231, 6727, 10952, 58477, 6728, 6729, 7095, 60559, 3309, 29927, 6731, 6730	1804	22	4809	1.81755	0.963552	0.210663	14.0857
GOTERM_BP_DIRECT	GO:0043044~ATP-dependent chromatin remodeling	15	0.317729	0.011369	6599, 6598, 1108, 6597, 5928, 53615, 8467, 57680, 9219, 3183, 3065, 8289, 3066, 6601, 60	4171	23	11756	1.83816	1	0.502466	20.1298
GOTERM_BP_DIRECT	GO:0007569~cell aging	15	0.317729	0.011369	23636, 675, 6647, 4869, 7157, 27250, 3383, 2475, 983, 4282, 10370, 3987, 57178, 6926, 23411	4171	23	11756	1.83816	1	0.502466	20.1298
SMART	SM00322:KH	19	0.402457	0.0113852	8880, 9444, 7536, 26057, 8570, 3069, 11103, 5093, 8939, 5094, 8165, 51320, 10643, 399664, 10644, 10642, 56902, 3190, 10657	2429	32	6919	1.6913	0.999725	0.421068	15.9033
INTERPRO	IPR012340:Nucleic acid-binding, OB-fold	35	0.741368	0.0114252	55157, 55749, 8531, 55133, 10856, 6205, 6830, 143244, 6117, 4677, 23404, 220042, 22894, 4904, 4173, 4172, 4175, 4174, 675, 8565, 6132, 4176, 3735, 8607, 1965, 22984, 4171, 3980, 171568, 6228, 1984, 79035, 7812, 1659, 6742	4344	70	12512	1.44015	1	0.688104	19.5133
UP_SEQ_FEATURE	repeat:WD 7	58	1.22855	0.0115251	7290, 256364, 22872, 54554, 197335, 55844, 10399, 25929, 26608, 27339, 55339, 55023, 54853, 11091, 79582, 84135, 50717, 9391, 30849, 55054, 11180, 57521, 54521, 64223, 25879, 64326, 1657, 57599, 25886, 134957, 5931, 84231, 5048, 8945, 79269, 2783, 11171, 5520, 5822, 51343, 1130, 9128, 6907, 51514, 253769, 10885, 9276, 27436, 9373, 11169, 2782, 54014, 23005, 55827, 23335, 79968, 7090, 7091	4552	128	13191	1.31309	1	0.802272	20.8441
GOTERM_CC_DIRECT	GO:0022624~proteasome accessory complex	12	0.254183	0.0116061	5717, 5718, 5708, 5709, 5706, 5707, 5704, 5710, 5705, 5702, 9861, 5701	4343	17	12453	2.02403	0.999998	0.168222	17.0923
UP_SEQ_FEATURE	domain:Bromo	17	0.360093	0.0116518	6595, 65980, 2033, 55870, 6597, 29028, 2648, 23613, 8805, 11176, 11177, 1387, 23774, 9031, 2186, 10155, 7862	4552	28	13191	1.75941	1	0.800747	21.0485
UP_SEQ_FEATURE	repeat:14	17	0.360093	0.0116518	23636, 4670, 2055, 9500, 2130, 9818, 8661, 8085, 6238, 10618, 3482, 8148, 4288, 4134, 7840, 5430, 400566	4552	28	13191	1.75941	1	0.800747	21.0485
INTERPRO	IPR002119:Histone H2A	10	0.21182	0.0118057	8969, 8338, 92815, 94239, 9555, 8336, 8334, 3014, 3015, 8330	4344	13	12512	2.21561	1	0.692259	20.0965
GOTERM_BP_DIRECT	GO:0006303~double-strand break repair via nonhomologous end joining	27	0.571913	0.0119777	79184, 10524, 22976, 10363, 55183, 22992, 79840, 27339, 9025, 7336, 5422, 8364, 7520, 10111, 8367, 78996, 9937, 672, 7468, 51588, 3014, 7158, 472, 2547, 286257, 5591, 64858	4171	50	11756	1.52199	1	0.517698	21.0909
GOTERM_CC_DIRECT	GO:0030532~small nuclear ribonucleoprotein complex	11	0.233001	0.0120382	50628, 8175, 6628, 6637, 6636, 6633, 6634, 6632, 10569, 23450, 96764	4343	15	12453	2.10274	0.999999	0.171776	17.6724
GOTERM_BP_DIRECT	GO:0036500~ATF6-mediated unfolded protein response	8	0.169456	0.0121075	811, 7494, 8720, 1388, 1649, 22926, 3309, 7184	4171	9	11756	2.50534	1	0.518413	21.2944
GOTERM_BP_DIRECT	GO:0035372~protein localization to microtubule	8	0.169456	0.0121075	11043, 1729, 283489, 9585, 2932, 22919, 1855, 4281	4171	9	11756	2.50534	1	0.518413	21.2944
GOTERM_BP_DIRECT	GO:0043486~histone exchange	8	0.169456	0.0121075	144108, 81611, 5757, 9025, 10467, 4678, 8125, 10541	4171	9	11756	2.50534	1	0.518413	21.2944
GOTERM_BP_DIRECT	GO:0045944~positive regulation of transcription from RNA polymerase II promoter	309	6.54522	0.0121327	3725, 7494, 4205, 3280, 3476, 6874, 29028, 51083, 3726, 22904, 59343, 10488, 8737, 4212, 29128, 607, 6613, 6497, 2958, 6495, 171023, 602, 3091, 8028, 1081, 207, 3297, 7337, 6879, 4605, 3491, 6875, 546, 4221, 10725, 2020, 58490, 6778, 2022, 4609, 5216, 4779, 7227, 4774, 4775, 8861, 51193, 27086, 51499, 23633, 7189, 1997, 7040, 253461, 22926, 1999, 4780, 4094, 4233, 10736, 23522, 2308, 2309, 55870,…	4171	784	11756	1.11087	1	0.516078	21.3339
GOTERM_MF_DIRECT	GO:0004579~dolichyl-diphosphooligosaccharide-protein glycotransferase activity	8	0.169456	0.0121813	6184, 1650, 58505, 84061, 201595, 3703, 6185, 1603	4211	9	11857	2.50286	1	0.400917	19.1274
GOTERM_CC_DIRECT	GO:0016580~Sin3 complex	10	0.21182	0.0121952	10933, 23309, 64426, 25942, 9611, 58516, 5928, 3065, 3066, 57649	4343	13	12453	2.20567	0.999999	0.171687	17.8822
GOTERM_BP_DIRECT	GO:0000226~microtubule cytoskeleton organization	35	0.741368	0.0125305	10460, 256364, 332, 5048, 92521, 667, 983, 150465, 23271, 25897, 6905, 2597, 2011, 4130, 4131, 5116, 8409, 7283, 4139, 6760, 55201, 55755, 7465, 27436, 10376, 90102, 5590, 23363, 23384, 283431, 10579, 4140, 6651, 23332, 4281	4171	69	11756	1.42968	1	0.524467	21.9543
KEGG_PATHWAY	hsa01230:Biosynthesis of amino acids	32	0.677822	0.0126682	6120, 1373, 5230, 1431, 5634, 5211, 6888, 7167, 6470, 3419, 2597, 26227, 7086, 6472, 29968, 65263, 226, 230, 2806, 2752, 5831, 5631, 5832, 4548, 875, 4144, 29920, 2023, 5315, 586, 587, 50	1804	59	4809	1.44583	0.975208	0.218456	15.5902
SMART	SM00414:H2A	10	0.21182	0.0127413	8969, 8338, 92815, 94239, 9555, 8336, 8334, 3014, 3015, 8330	2429	13	6919	2.19115	0.999897	0.43664	17.6314
GOTERM_BP_DIRECT	GO:0006409~tRNA export from nucleus	19	0.402457	0.0129258	8021, 23636, 23225, 65083, 23511, 9818, 8086, 23279, 5901, 23165, 5903, 4927, 7175, 348995, 11097, 9972, 10762, 11260, 55706	4171	32	11756	1.67349	1	0.532505	22.5662
GOTERM_BP_DIRECT	GO:0007059~chromosome segregation	32	0.677822	0.0129948	23172, 1104, 6188, 387103, 348235, 90417, 5518, 10615, 8239, 55355, 79003, 6732, 3619, 9391, 672, 11243, 2908, 7150, 55755, 3832, 7153, 28989, 1063, 1062, 292, 79980, 10664, 1654, 64793, 148479, 8780, 10783	4171	62	11756	1.45471	1	0.531384	22.6725
GOTERM_CC_DIRECT	GO:0071339~MLL1 complex	17	0.360093	0.0130008	54881, 27043, 26168, 10856, 5929, 23269, 284058, 6874, 8607, 26121, 51230, 4297, 6879, 57680, 100529209, 11091, 3054	4343	28	12453	1.7409	1	0.179802	18.9509
UP_SEQ_FEATURE	domain:BTB	55	1.16501	0.0130028	7597, 55709, 10206, 23510, 53339, 571, 9923, 7126, 9925, 89890, 23276, 200845, 80311, 22903, 84861, 29068, 79047, 54813, 7541, 51133, 57621, 8405, 57563, 55892, 55958, 112939, 10472, 55295, 7690, 10009, 222658, 79798, 3959, 9880, 403341, 22890, 65986, 25948, 57659, 9903, 253461, 51341, 23119, 10773, 49854, 23099, 57542, 9278, 8507, 54442, 27107, 55175, 9841, 54800, 23598	4552	121	13191	1.3172	1	0.830302	23.1964
GOTERM_BP_DIRECT	GO:0010939~regulation of necrotic cell death	9	0.190638	0.0133452	10105, 7186, 329, 8737, 330, 7316, 7314, 6233, 7311	4171	11	11756	2.30605	1	0.537915	23.2104
GOTERM_BP_DIRECT	GO:0034968~histone lysine methylation	9	0.190638	0.0133452	9869, 63976, 2122, 4221, 7799, 79918, 80854, 54904, 10919	4171	11	11756	2.30605	1	0.537915	23.2104
GOTERM_BP_DIRECT	GO:0051170~nuclear import	12	0.254183	0.0133666	79760, 50628, 6628, 6637, 79833, 6636, 6633, 6634, 6632, 11218, 6607, 25929	4171	17	11756	1.98954	1	0.535508	23.2432
GOTERM_BP_DIRECT	GO:0000027~ribosomal large subunit assembly	12	0.254183	0.0133666	51187, 23195, 80135, 6147, 6122, 6135, 55052, 6125, 84154, 55299, 51154, 6128	4171	17	11756	1.98954	1	0.535508	23.2432
UP_SEQ_FEATURE	repeat:5	35	0.741368	0.0133834	23636, 29978, 11054, 2055, 2130, 8030, 6634, 85378, 1786, 55740, 6238, 22905, 10618, 8148, 3482, 55814, 4134, 4130, 11135, 400566, 4670, 9500, 3097, 643314, 9818, 7428, 8661, 9295, 8085, 5528, 4288, 7840, 5430, 56623, 10762	4552	71	13191	1.42852	1	0.834427	23.7914
UP_SEQ_FEATURE	repeat:HEAT 1	28	0.593095	0.0134076	64151, 7514, 3843, 8672, 3842, 2475, 5518, 23116, 9670, 23392, 9793, 55832, 10985, 26953, 3837, 30849, 221927, 23451, 30000, 9731, 54919, 22820, 25836, 23066, 9989, 5591, 23332, 3064	4552	54	13191	1.50259	1	0.83047	23.8291
UP_SEQ_FEATURE	repeat:HEAT 2	28	0.593095	0.0134076	64151, 7514, 3843, 8672, 3842, 2475, 5518, 23116, 9670, 23392, 9793, 55832, 10985, 26953, 3837, 30849, 221927, 23451, 30000, 9731, 54919, 22820, 25836, 23066, 9989, 5591, 23332, 3064	4552	54	13191	1.50259	1	0.83047	23.8291
GOTERM_BP_DIRECT	GO:0000082~G1/S transition of mitotic cell cycle	46	0.97437	0.0136829	8554, 2935, 113130, 7298, 6241, 5537, 1104, 8318, 1027, 983, 1031, 143384, 6117, 5422, 1978, 5111, 58480, 595, 4173, 23594, 4172, 4175, 4174, 11040, 81620, 4176, 26524, 5426, 9088, 1017, 1019, 26271, 4171, 5902, 10769, 997, 55388, 6198, 1022, 8454, 9113, 8453, 8451, 586, 5932, 6194	4171	96	11756	1.35054	1	0.540949	23.7255
GOTERM_BP_DIRECT	GO:0006414~translational elongation	11	0.233001	0.0137422	1936, 9521, 6181, 10102, 10767, 1938, 7284, 1937, 1915, 6176, 9567	4171	15	11756	2.06691	1	0.539564	23.8155
GOTERM_BP_DIRECT	GO:0048009~insulin-like growth factor receptor signaling pathway	10	0.21182	0.0137973	3480, 26058, 3482, 2887, 64599, 7249, 3667, 51232, 5295, 207	4171	13	11756	2.16808	1	0.538089	23.8992
GOTERM_BP_DIRECT	GO:0090201~negative regulation of release of cytochrome c from mitochondria	10	0.21182	0.0137973	409, 10105, 2395, 2876, 598, 51499, 207, 8996, 27166, 5716	4171	13	11756	2.16808	1	0.538089	23.8992
GOTERM_BP_DIRECT	GO:0000380~alternative mRNA splicing, via spliceosome	10	0.21182	0.0137973	8621, 4670, 6433, 84991, 23028, 80004, 10569, 6421, 6426, 5725	4171	13	11756	2.16808	1	0.538089	23.8992
GOTERM_BP_DIRECT	GO:0070266~necroptotic process	10	0.21182	0.0137973	10105, 148022, 7099, 329, 8737, 5836, 197259, 1540, 54822, 192111	4171	13	11756	2.16808	1	0.538089	23.8992
GOTERM_MF_DIRECT	GO:0031996~thioesterase binding	10	0.21182	0.0138962	7189, 7188, 7187, 7186, 9618, 805, 801, 808, 382, 5879	4211	13	11857	2.16594	1	0.436586	21.5251
UP_KEYWORDS	Methyltransferase	75	1.58865	0.013897	127253, 57721, 2091, 55783, 55904, 7298, 1312, 55471, 10919, 23463, 57570, 23070, 56257, 64745, 115294, 27037, 63977, 23210, 6839, 23067, 152992, 84444, 28989, 56339, 9739, 79918, 60487, 96764, 4297, 79813, 9869, 10436, 751071, 58508, 4548, 29072, 144233, 4837, 64324, 4839, 117246, 79723, 387338, 11108, 10322, 131965, 7799, 339175, 54888, 22992, 1786, 6894, 54931, 6470, 90826, 6472, 55006, 3276, …	4583	173	13285	1.25669	0.999706	0.115907	18.5985
UP_KEYWORDS	Nuclear pore complex	25	0.529549	0.014033	8888, 23636, 23511, 4641, 10204, 23279, 4927, 25909, 143244, 348995, 59343, 11097, 9972, 8021, 23225, 11269, 55308, 9818, 8086, 23165, 5903, 7175, 1984, 10762, 55706	4583	47	13285	1.54189	0.999728	0.115339	18.7635
UP_SEQ_FEATURE	repeat:7	30	0.635459	0.0141006	23636, 29978, 11054, 2055, 2130, 85378, 55740, 6238, 10618, 8148, 3482, 55814, 4134, 4130, 11135, 400566, 4670, 9500, 3097, 643314, 9818, 7428, 8661, 8085, 9295, 4288, 7840, 5430, 56623, 4691	4552	59	13191	1.47348	1	0.841127	24.9007
GOTERM_MF_DIRECT	GO:0000287~magnesium ion binding	76	1.60983	0.0141079	10797, 26164, 159, 55276, 5635, 5634, 1312, 10994, 5636, 11329, 2956, 2011, 246243, 248, 4217, 3251, 63979, 6732, 128178, 6733, 5609, 6885, 2752, 25, 51567, 27, 1854, 55556, 5494, 10914, 5495, 375, 9113, 4830, 23413, 8986, 2023, 5315, 115024, 54861, 150223, 3607, 60496, 1455, 6300, 6794, 54928, 9578, 80119, 83983, 5464, 283871, 6789, 3419, 8444, 8445, 23250, 8566, 5728, 23387, 4139, 55149, 11164,…	4211	171	11857	1.25143	1	0.43535	21.8163
GOTERM_BP_DIRECT	GO:0034080~CENP-A containing nucleosome assembly	18	0.381275	0.0141686	5928, 79172, 4869, 64105, 8607, 91687, 387103, 8467, 57082, 2491, 55166, 8364, 55355, 51773, 55320, 8367, 201254, 5931	4171	30	11756	1.69111	1	0.544754	24.4604
GOTERM_CC_DIRECT	GO:0000228~nuclear chromosome	20	0.423639	0.0142749	3725, 63979, 6598, 7150, 332, 9555, 8091, 7153, 55193, 641, 10472, 3021, 8364, 2956, 9189, 5885, 23064, 8358, 8367, 8356	4343	35	12453	1.6385	1	0.193386	20.6145
UP_SEQ_FEATURE	repeat:10	22	0.466003	0.0144314	29978, 23636, 4670, 2055, 9500, 2130, 3097, 643314, 9818, 8661, 8085, 9295, 6238, 10618, 3482, 8148, 4288, 7840, 4134, 5430, 56623, 400566	4552	40	13191	1.59382	1	0.843678	25.4072
KEGG_PATHWAY	hsa04520:Adherens junction	34	0.720186	0.0145552	25945, 4301, 1459, 2033, 1956, 7414, 1499, 3480, 1500, 387, 1387, 1460, 81, 60, 7046, 7082, 87, 4233, 117178, 10163, 5792, 8936, 6885, 10458, 8826, 4088, 2534, 4089, 71, 5879, 1495, 5819, 5594, 6934	1804	64	4809	1.41618	0.985765	0.23337	17.7097
GOTERM_BP_DIRECT	GO:0006283~transcription-coupled nucleotide-excision repair	36	0.76255	0.0146395	57461, 5434, 9318, 5435, 8533, 7515, 5438, 2033, 2072, 404672, 27339, 2873, 5985, 6117, 5111, 7874, 1642, 5441, 2067, 5424, 10980, 50813, 7316, 7314, 6233, 3980, 7311, 1022, 8451, 5431, 8450, 5430, 5433, 5432, 2968, 2967	4171	72	11756	1.40925	1	0.553698	25.1665
GOTERM_BP_DIRECT	GO:0006521~regulation of cellular amino acid metabolic process	25	0.529549	0.014703	5717, 5718, 5710, 9861, 5713, 5686, 5685, 5683, 5716, 9491, 10197, 4946, 5708, 5709, 5706, 5707, 5704, 5691, 5705, 5702, 5695, 5701, 5688, 5689, 4953	4171	46	11756	1.5318	1	0.552398	25.2612
GOTERM_BP_DIRECT	GO:0017148~negative regulation of translation	28	0.593095	0.0147188	65981, 3609, 10399, 6188, 9470, 9775, 23019, 2597, 3658, 1153, 4076, 23034, 10658, 811, 10140, 26058, 11236, 23521, 8507, 10492, 5813, 10643, 7248, 10644, 1654, 10642, 5936, 2058	4171	53	11756	1.48902	1	0.549946	25.2848
GOTERM_BP_DIRECT	GO:0006974~cellular response to DNA damage stimulus	86	1.82165	0.0148773	84930, 5893, 1106, 9923, 9557, 641, 1663, 9100, 602, 55719, 79791, 55031, 6839, 672, 5929, 23645, 25, 207, 79915, 5366, 54962, 25836, 10721, 23476, 8451, 472, 4221, 58493, 6446, 23064, 5930, 23411, 4609, 5594, 5252, 3661, 22890, 9261, 5663, 7415, 6794, 57659, 26574, 6188, 25946, 254225, 7189, 10010, 253461, 9025, 1649, 259282, 29089, 9320, 80169, 10111, 8445, 51514, 595, 7528, 4176, 2308, 79677, …	4171	197	11756	1.23041	1	0.551005	25.5207
KEGG_PATHWAY	hsa05010:Alzheimer's disease	68	1.44037	0.0151564	1351, 1350, 29796, 840, 805, 4697, 801, 5332, 488, 5534, 8772, 25825, 6391, 1349, 1347, 506, 509, 55851, 1327, 7132, 4695, 4696, 1337, 7388, 4694, 7386, 5594, 7384, 824, 4023, 823, 2932, 5663, 4702, 10975, 4700, 4731, 27089, 51107, 513, 2597, 22926, 9167, 126328, 518, 517, 102, 515, 9377, 8851, 4728, 4716, 4723, 4713, 4726, 4725, 4715, 440567, 498, 4710, 351, 522, 355, 54205, 55967, 6389, 808, 23…	1804	144	4809	1.25882	0.988074	0.229356	18.3746
UP_SEQ_FEATURE	compositionally biased region:Poly-Ala	131	2.77484	0.0151784	4302, 55749, 23131, 1108, 8535, 6874, 1107, 10919, 2295, 2296, 339287, 8669, 2956, 607, 51773, 10155, 678, 84747, 7546, 3204, 23780, 10536, 3207, 4216, 23645, 3209, 27079, 113263, 57215, 7403, 79813, 51621, 23264, 1981, 149371, 23476, 5934, 6601, 5936, 871, 79595, 26986, 402055, 81610, 55316, 8761, 2314, 3843, 54928, 6942, 54936, 57690, 29777, 51293, 4091, 51218, 23592, 84726, 2308, 140901, 2303,…	4552	322	13191	1.17894	1	0.854086	26.539
GOTERM_BP_DIRECT	GO:0007346~regulation of mitotic cell cycle	21	0.444821	0.0156787	8872, 10055, 11040, 415116, 10795, 332, 26271, 1025, 5727, 26574, 8729, 10296, 5347, 1540, 150094, 56254, 10783, 4609, 1164, 23411, 9810	4171	37	11756	1.59969	1	0.567286	26.7028
UP_SEQ_FEATURE	zinc finger region:RING-type	72	1.5251	0.015862	10206, 55905, 90850, 7844, 57674, 330, 55182, 10616, 25898, 51320, 5987, 29128, 9148, 64219, 10155, 56254, 51529, 51132, 11043, 10336, 4194, 672, 6737, 81847, 4193, 22888, 84900, 64326, 55658, 58508, 6015, 84333, 84851, 84231, 89970, 868, 81559, 56658, 22954, 254225, 7189, 55167, 7188, 7187, 7186, 57617, 113878, 23295, 9025, 221687, 267, 9810, 90933, 23321, 81603, 9618, 79102, 9616, 329, 80196, 2…	4552	166	13191	1.2569	1	0.862453	27.5605
UP_SEQ_FEATURE	domain:FHA	18	0.381275	0.0158788	4301, 79753, 92610, 3607, 63971, 9928, 283638, 57649, 221937, 5511, 23187, 9859, 6941, 9025, 4288, 7871, 10749, 23095	4552	31	13191	1.68262	1	0.858904	27.5854
BIOCARTA	h_carm-erPathway:CARM1 and Regulation of the Estrogen Receptor	18	0.381275	0.0163651	595, 27043, 126961, 2033, 672, 8204, 5469, 23013, 2962, 10011, 2960, 1387, 6908, 2957, 3065, 3066, 5430, 11331	520	28	1324	1.63681	0.990778	0.48801	19.64
UP_SEQ_FEATURE	repeat:6	31	0.656641	0.0164285	23636, 29978, 11054, 2055, 2130, 85378, 55740, 22905, 6238, 10618, 8148, 3482, 55814, 4134, 4130, 11135, 400566, 4670, 9500, 3097, 643314, 9818, 7428, 8661, 8085, 9295, 4288, 7840, 5430, 56623, 4691	4552	62	13191	1.44892	1	0.864517	28.3966
UP_SEQ_FEATURE	topological domain:Lumenal	150	3.17729	0.0165472	79586, 50999, 284098, 27333, 488, 51009, 170384, 84002, 1523, 79888, 55379, 3340, 3482, 10613, 535, 1388, 92579, 11014, 10488, 3920, 9653, 10134, 149175, 2651, 375035, 9445, 55851, 25972, 124583, 8733, 476, 1798, 64225, 79694, 11282, 4122, 3916, 55650, 57168, 56926, 26984, 57552, 6184, 112770, 54732, 64132, 3998, 6400, 22856, 57222, 91012, 821, 6185, 3895, 283358, 92140, 51614, 10945, 81555, 2292…	4552	374	13191	1.16224	1	0.862793	28.5706
BIOCARTA	h_vdrPathway:Control of Gene Expression by Vitamin D Receptor	17	0.360093	0.0166868	3276, 9611, 9318, 10036, 6599, 2033, 6597, 7155, 7249, 5469, 10499, 11198, 1387, 3065, 8289, 6601, 9031	520	26	1324	1.66479	0.991596	0.449748	19.9875
BIOCARTA	h_ctcfPathway:CTCF: First Multivalent Nuclear Factor	15	0.317729	0.016952	5728, 4193, 1027, 7157, 2475, 7040, 6198, 10664, 5515, 4090, 4089, 7046, 5295, 4609, 4086	520	22	1324	1.73601	0.992216	0.41697	20.273
UP_KEYWORDS	Microtubule	95	2.01229	0.0169952	256364, 84276, 332, 23172, 85378, 22933, 24137, 22974, 2288, 9928, 23710, 10540, 10383, 9859, 4926, 23271, 10615, 3925, 9493, 27130, 9654, 11043, 5116, 56992, 3619, 7283, 55755, 84445, 63971, 283349, 79659, 10376, 9702, 9585, 64837, 9055, 55920, 25941, 57701, 140735, 2622, 51203, 11104, 5048, 22919, 29105, 1785, 83593, 23354, 667, 8655, 6790, 283638, 348235, 90417, 1540, 4134, 51512, 84790, 83658…	4583	227	13285	1.21314	0.999953	0.136237	22.2793
GOTERM_MF_DIRECT	GO:0003746~translation elongation factor activity	16	0.338911	0.0171176	1936, 9521, 6829, 1938, 1937, 7284, 1915, 9567, 143244, 10767, 10102, 84337, 1984, 85476, 79921, 6924	4211	26	11857	1.73275	1	0.494233	25.8492
GOTERM_CC_DIRECT	GO:0005793~endoplasmic reticulum-Golgi intermediate compartment	32	0.677822	0.0171303	10972, 4043, 2055, 10130, 10897, 54732, 50999, 3146, 3998, 51006, 2335, 56886, 57222, 10959, 11196, 64841, 10945, 23405, 9798, 56005, 11079, 23392, 4924, 10960, 285704, 6836, 3309, 5034, 2804, 8729, 29097, 871	4343	64	12453	1.43369	1	0.22502	24.2275
GOTERM_CC_DIRECT	GO:0000793~condensed chromosome	14	0.296547	0.0172869	283489, 3148, 3146, 1017, 9555, 7153, 10270, 23481, 8467, 8815, 10664, 4288, 2177, 9031	4343	22	12453	1.82469	1	0.224285	24.4211
GOTERM_CC_DIRECT	GO:0005789~endoplasmic reticulum membrane	275	5.82504	0.0175207	7494, 5738, 10206, 10897, 10890, 50999, 284098, 1314, 79087, 55379, 10613, 1727, 10488, 85465, 7485, 23780, 55851, 23645, 8733, 23507, 1717, 1718, 9867, 7345, 1984, 56926, 55650, 4779, 23399, 9986, 5355, 1595, 114882, 57222, 5352, 310, 5351, 23011, 821, 92140, 253558, 84197, 9197, 22926, 6747, 6746, 7184, 6745, 813, 375056, 54872, 224, 58477, 10313, 2590, 2589, 100128731, 9600, 4853, 10857, 10952…	4343	710	12453	1.1106	1	0.224445	24.7093
UP_SEQ_FEATURE	repeat:8	28	0.593095	0.0178328	29978, 23636, 2055, 2130, 85378, 55740, 6238, 10618, 8148, 3482, 4130, 11135, 400566, 4670, 9500, 3097, 643314, 9818, 7428, 8661, 8085, 9295, 5528, 4288, 7840, 5430, 4691, 56623	4552	55	13191	1.47527	1	0.879176	30.4302
GOTERM_BP_DIRECT	GO:0007030~Golgi organization	34	0.720186	0.0179525	2580, 10972, 9382, 54808, 1453, 54732, 1452, 25923, 3998, 57584, 23207, 93643, 8615, 10959, 11196, 64689, 55666, 9529, 9321, 55204, 5862, 64083, 8874, 10960, 6836, 79659, 2804, 137886, 64225, 8729, 23363, 400, 23332, 3064	4171	68	11756	1.40925	1	0.614371	29.9604
GOTERM_BP_DIRECT	GO:0006417~regulation of translation	23	0.487185	0.0180737	10985, 9939, 8872, 677, 51204, 26065, 2309, 22794, 7298, 83939, 6208, 207, 208, 5036, 351, 6169, 2872, 1656, 7248, 55571, 9148, 5935, 55037	4171	42	11756	1.54347	1	0.614051	30.1302
UP_SEQ_FEATURE	repeat:11	20	0.423639	0.0182661	29978, 23636, 4670, 2055, 9500, 2130, 643314, 9818, 8661, 8085, 6238, 10618, 3482, 8148, 4288, 7840, 4134, 5430, 56623, 400566	4552	36	13191	1.60992	1	0.881963	31.0464
GOTERM_CC_DIRECT	GO:0000776~kinetochore	38	0.804914	0.0183469	8243, 25942, 11130, 7514, 92822, 5663, 5048, 23279, 10540, 8655, 387103, 23468, 90417, 348995, 10615, 5347, 6612, 4659, 7272, 9793, 9770, 5905, 3619, 699, 81930, 324, 3835, 23160, 1063, 1062, 23219, 2491, 9212, 7756, 1639, 7175, 9184, 23332	4343	79	12453	1.37924	1	0.231217	25.7195
UP_KEYWORDS	Mitochondrion nucleoid	12	0.254183	0.0188575	56652, 5428, 54931, 55794, 60493, 2926, 7019, 22907, 6472, 22868, 6742, 79736	4583	18	13285	1.9325	0.999984	0.148113	24.4164
GOTERM_BP_DIRECT	GO:0090307~mitotic spindle assembly	19	0.402457	0.0191521	3837, 329, 23172, 332, 3833, 2316, 3832, 330, 85378, 22974, 9371, 4605, 7756, 387, 1213, 3796, 49856, 8481, 23332	4171	33	11756	1.62278	1	0.632768	31.6232
UP_SEQ_FEATURE	cross-link:Glycyl lysine isopeptide (Lys-Gly) (interchain with G-Cter in SUMO)	38	0.804914	0.0193394	7705, 7227, 8535, 7020, 7189, 1051, 1052, 6612, 3659, 6613, 103, 23020, 5905, 79753, 1487, 4869, 2908, 7150, 3091, 51588, 6667, 7157, 3297, 10210, 5903, 11315, 57680, 10664, 10914, 6304, 3183, 6670, 3185, 3065, 875, 3068, 23314, 6934	4552	80	13191	1.37648	1	0.892917	32.5507
GOTERM_CC_DIRECT	GO:0044297~cell body	26	0.550731	0.0194776	23032, 5783, 6950, 1312, 2783, 23710, 2771, 8772, 5420, 3305, 6780, 22948, 6158, 10575, 11315, 5028, 10576, 7430, 2782, 27101, 10574, 4771, 203068, 2186, 7203, 6194	4343	50	12453	1.49103	1	0.241083	27.0814
GOTERM_CC_DIRECT	GO:0005875~microtubule associated complex	17	0.360093	0.0197522	10048, 23637, 6780, 10513, 5048, 23160, 55172, 8682, 5903, 4134, 7804, 10121, 23095, 4130, 4131, 5829, 4281	4343	29	12453	1.68087	1	0.241474	27.4085
INTERPRO	IPR001163:Ribonucleoprotein LSM domain	12	0.254183	0.0198232	6628, 6637, 25804, 6636, 84316, 84967, 6633, 27258, 6634, 27257, 6632, 51691	4344	18	12512	1.9202	1	0.857084	31.4937
GOTERM_BP_DIRECT	GO:0030968~endoplasmic reticulum unfolded protein response	22	0.466003	0.0200503	595, 80279, 7494, 80267, 10273, 23645, 27230, 55298, 7415, 84447, 16, 7466, 8614, 3309, 56886, 30001, 51009, 26608, 1388, 22926, 267, 4780	4171	40	11756	1.55018	1	0.647015	32.8436
GOTERM_BP_DIRECT	GO:0006418~tRNA aminoacylation for protein translation	22	0.466003	0.0200503	55157, 9521, 8565, 5917, 6301, 2617, 3735, 51520, 7407, 51067, 16, 3376, 92935, 833, 7965, 6897, 5464, 4677, 23395, 5859, 2058, 4141	4171	40	11756	1.55018	1	0.647015	32.8436
GOTERM_MF_DIRECT	GO:0071889~14-3-3 protein binding	14	0.296547	0.0202807	51564, 10971, 677, 6733, 8660, 57521, 54541, 207, 409, 55633, 5590, 5298, 4659, 150094	4211	22	11857	1.79182	1	0.548073	29.8759
GOTERM_MF_DIRECT	GO:0001106~RNA polymerase II transcription corepressor activity	14	0.296547	0.0202807	1487, 25942, 8409, 57649, 10915, 23613, 10370, 23309, 8725, 26036, 3065, 3068, 5932, 10443	4211	22	11857	1.79182	1	0.548073	29.8759
GOTERM_BP_DIRECT	GO:0007283~spermatogenesis	89	1.88519	0.0204788	22873, 8531, 5127, 55905, 3148, 10549, 330, 9825, 6522, 3482, 9698, 5987, 55339, 84678, 51460, 5887, 22803, 6498, 23304, 259266, 6662, 10134, 2067, 26528, 6647, 675, 54890, 3301, 7584, 5927, 3206, 3207, 166378, 2802, 54993, 3297, 64224, 1656, 79893, 57599, 6875, 546, 4089, 23064, 23411, 56603, 55706, 23636, 9319, 55723, 8554, 10272, 8091, 1785, 6794, 1604, 10942, 6046, 1069, 6908, 23424, 94107, 7…	4171	207	11756	1.21182	1	0.652113	33.4185
UP_SEQ_FEATURE	domain:PWWP	11	0.233001	0.0205121	23613, 170394, 114825, 11168, 55777, 23774, 84656, 2956, 3068, 84717, 7862	4552	16	13191	1.99227	1	0.903734	34.1587
GOTERM_MF_DIRECT	GO:0047485~protein N-terminus binding	42	0.889642	0.0205754	10971, 11130, 1459, 6599, 4204, 6597, 2072, 382, 6895, 7189, 23613, 8815, 7040, 3516, 23424, 60412, 80764, 81, 4863, 23524, 55770, 11235, 6839, 329, 85365, 7157, 10933, 1616, 6227, 84313, 25836, 7248, 1984, 5501, 472, 3065, 4221, 10456, 11331, 3646, 142, 2967	4211	88	11857	1.34387	1	0.546839	30.2404
UP_KEYWORDS	Signal recognition particle	6	0.127092	0.0208429	6726, 6727, 6728, 6729, 6731, 6730	4583	6	13285	2.89876	0.999995	0.160396	26.6346
UP_SEQ_FEATURE	domain:RAP	6	0.127092	0.0208727	79675, 10922, 60493, 9238, 79072, 22868	4552	6	13191	2.89785	1	0.904828	34.6457
INTERPRO	IPR007502:Helicase-associated domain	11	0.233001	0.0214424	9704, 79665, 55760, 90957, 170506, 1665, 22907, 64848, 1659, 1660, 9785	4344	16	12512	1.9802	1	0.872949	33.6004
INTERPRO	IPR011709:Domain of unknown function DUF1605	11	0.233001	0.0214424	9704, 79665, 55760, 90957, 170506, 1665, 22907, 64848, 1659, 1660, 9785	4344	16	12512	1.9802	1	0.872949	33.6004
INTERPRO	IPR013584:RAP domain	6	0.127092	0.0214615	79675, 10922, 60493, 9238, 79072, 22868	4344	6	12512	2.88029	1	0.867837	33.6248
INTERPRO	IPR006576:BRK domain	6	0.127092	0.0214615	6595, 57680, 84181, 6597, 55636, 80205	4344	6	12512	2.88029	1	0.867837	33.6248
INTERPRO	IPR003891:Initiation factor eIF-4 gamma, MA3	6	0.127092	0.0214615	1982, 1981, 64434, 57703, 8672, 27250	4344	6	12512	2.88029	1	0.867837	33.6248
INTERPRO	IPR018525:Mini-chromosome maintenance, conserved site	6	0.127092	0.0214615	4173, 4172, 4175, 4174, 4176, 4171	4344	6	12512	2.88029	1	0.867837	33.6248
INTERPRO	IPR010622:FAST kinase leucine-rich	6	0.127092	0.0214615	79675, 10922, 60493, 9238, 79072, 22868	4344	6	12512	2.88029	1	0.867837	33.6248
INTERPRO	IPR013579:FAST kinase-like protein, subdomain 2	6	0.127092	0.0214615	79675, 10922, 60493, 9238, 79072, 22868	4344	6	12512	2.88029	1	0.867837	33.6248
SMART	SM00651:Sm	12	0.254183	0.0215293	6628, 6637, 25804, 6636, 84316, 84967, 6633, 27258, 6634, 27257, 6632, 51691	2429	18	6919	1.899	1	0.600151	28.0511
INTERPRO	IPR001005:SANT/Myb domain	22	0.466003	0.021588	9611, 988, 6599, 114803, 6621, 26009, 55809, 57708, 93624, 8467, 23186, 4605, 57585, 166968, 9219, 9112, 55814, 7270, 9988, 6601, 55320, 27000	4344	41	12512	1.54552	1	0.864104	33.7868
BIOCARTA	h_il4Pathway:IL 4 signaling pathway	8	0.169456	0.0218307	6198, 2885, 6464, 3667, 3566, 6778, 3716, 207	520	9	1324	2.26325	0.998105	0.465733	25.3597
INTERPRO	IPR011989:Armadillo-like helical	83	1.7581	0.0218687	64151, 7249, 29028, 55183, 2475, 63916, 60626, 9698, 55188, 253260, 56259, 8502, 9793, 259266, 57492, 23214, 51236, 55127, 30849, 54892, 5707, 79699, 23451, 30000, 57521, 54919, 23640, 163, 440590, 164, 25836, 8539, 23066, 8295, 5591, 79798, 55705, 25831, 54881, 55156, 10527, 7866, 10526, 1434, 7514, 93436, 3843, 8943, 3842, 23633, 1499, 1500, 5518, 6908, 9675, 285527, 8289, 9320, 23116, 9670, 23…	4344	196	12512	1.21972	1	0.862375	34.1447
GOTERM_CC_DIRECT	GO:0005786~signal recognition particle, endoplasmic reticulum targeting	6	0.127092	0.0219093	6726, 6727, 6728, 6729, 6731, 6730	4343	6	12453	2.86737	1	0.261549	29.9314
GOTERM_CC_DIRECT	GO:0070937~CRD-mediated mRNA stability complex	6	0.127092	0.0219093	10642, 3192, 7812, 10492, 1660, 4904	4343	6	12453	2.86737	1	0.261549	29.9314
UP_SEQ_FEATURE	short sequence motif:LXXLL motif	10	0.21182	0.0220227	8554, 114803, 51780, 51588, 6778, 10463, 171023, 57727, 221037, 9063	4552	14	13191	2.06989	1	0.913885	36.1763
GOTERM_CC_DIRECT	GO:0035371~microtubule plus-end	11	0.233001	0.0221597	10982, 90417, 1639, 57701, 10615, 57606, 55755, 22919, 9793, 23332, 667	4343	16	12453	1.97132	1	0.261441	30.2189
UP_SEQ_FEATURE	repeat:15	15	0.317729	0.0222912	23636, 4670, 2055, 9500, 2130, 8661, 8085, 6238, 3482, 8148, 4288, 4134, 7840, 5430, 400566	4552	25	13191	1.73871	1	0.91385	36.5287
GOTERM_MF_DIRECT	GO:0046332~SMAD binding	21	0.444821	0.0225031	9958, 1601, 64750, 10140, 10527, 657, 1290, 7528, 63976, 4205, 10273, 2316, 8091, 1499, 5813, 5814, 54778, 8312, 6498, 6497, 7046	4211	38	11857	1.55606	1	0.573145	32.5808
SMART	SM00952:SM00952	6	0.127092	0.0225437	79675, 10922, 60493, 9238, 79072, 22868	2429	6	6919	2.8485	1	0.596266	29.1711
SMART	SM00544:MA3	6	0.127092	0.0225437	1982, 1981, 64434, 57703, 8672, 27250	2429	6	6919	2.8485	1	0.596266	29.1711
SMART	SM00592:BRK	6	0.127092	0.0225437	6595, 57680, 84181, 6597, 55636, 80205	2429	6	6919	2.8485	1	0.596266	29.1711
INTERPRO	IPR016021:MIF4-like, type 1/2/3	10	0.21182	0.0229482	1982, 1983, 1981, 9689, 64434, 26019, 57703, 8672, 28969, 27250	4344	14	12512	2.05735	1	0.870357	35.5042
GOTERM_CC_DIRECT	GO:0005637~nuclear inner membrane	19	0.402457	0.0229736	26092, 7112, 10269, 23592, 25972, 10204, 10280, 4001, 199953, 10128, 144404, 4088, 11270, 84823, 23333, 4086, 23411, 9782, 11335	4343	34	12453	1.60236	1	0.267006	31.1456
SMART	SM00913:SM00913	11	0.233001	0.0231657	23214, 10527, 10526, 1434, 3837, 7514, 30000, 9670, 3842, 55705, 11260	2429	16	6919	1.95834	1	0.586563	29.8498
SMART	SM00358:DSRM	11	0.233001	0.0231657	6780, 3609, 54487, 23405, 29102, 104, 103, 1660, 6895, 6651, 55922	2429	16	6919	1.95834	1	0.586563	29.8498
SMART	SM00847:SM00847	11	0.233001	0.0231657	9704, 79665, 55760, 90957, 170506, 1665, 22907, 64848, 1659, 1660, 9785	2429	16	6919	1.95834	1	0.586563	29.8498
BIOCARTA	h_integrinPathway:Integrin Signaling Pathway	20	0.423639	0.023451	6093, 3725, 1445, 823, 5894, 6464, 826, 7414, 9564, 7791, 857, 1399, 387, 2885, 7094, 2534, 5829, 87, 6654, 5594	520	33	1324	1.54312	0.998817	0.4581	26.9815
GOTERM_BP_DIRECT	GO:0042776~mitochondrial ATP synthesis coupled proton transport	12	0.254183	0.023471	522, 513, 521, 506, 509, 10632, 30968, 518, 517, 9551, 498, 515	4171	18	11756	1.87901	1	0.699714	37.3047
UP_SEQ_FEATURE	DNA-binding region:A.T hook 3	7	0.148274	0.0234734	11176, 55870, 10847, 8091, 3159, 9757, 4297	4552	8	13191	2.53562	1	0.922054	38.0585
UP_SEQ_FEATURE	domain:CID	7	0.148274	0.0234734	23350, 23248, 51585, 22828, 58490, 55197, 10523	4552	8	13191	2.53562	1	0.922054	38.0585
INTERPRO	IPR017884:SANT domain	15	0.317729	0.0235324	9611, 6599, 114803, 55809, 57708, 93624, 8467, 23186, 57585, 166968, 9219, 9112, 6601, 55320, 27000	4344	25	12512	1.72818	1	0.872137	36.2288
GOTERM_BP_DIRECT	GO:0042256~mature ribosome assembly	6	0.127092	0.0237042	387338, 1654, 79631, 3692, 708, 51119	4171	6	11756	2.81851	1	0.700663	37.5985
GOTERM_BP_DIRECT	GO:0000389~mRNA 3'-splice site recognition	6	0.127092	0.0237042	57461, 7536, 8175, 10946, 10291, 10569	4171	6	11756	2.81851	1	0.700663	37.5985
GOTERM_MF_DIRECT	GO:0070180~large ribosomal subunit rRNA binding	6	0.127092	0.0238125	6181, 9349, 6143, 51154, 6176, 6175	4211	6	11857	2.81572	1	0.587658	34.1281
UP_KEYWORDS	CF(0)	8	0.169456	0.0238865	522, 521, 23041, 10632, 518, 517, 9551, 515	4583	10	13285	2.31901	0.999999	0.179497	29.9173
UP_SEQ_FEATURE	compositionally biased region:Glu/Lys-rich	8	0.169456	0.023929	4301, 3223, 5708, 26019, 4659, 6446, 8028, 5713	4552	10	13191	2.31828	1	0.923504	38.6386
UP_SEQ_FEATURE	zinc finger region:CXXC-type	8	0.169456	0.023929	30827, 80312, 84678, 9757, 54620, 22992, 1786, 4297	4552	10	13191	2.31828	1	0.923504	38.6386
UP_SEQ_FEATURE	repeat:HEAT 12	8	0.169456	0.023929	10985, 5518, 23066, 30000, 9989, 9670, 23392, 55832	4552	10	13191	2.31828	1	0.923504	38.6386
UP_SEQ_FEATURE	repeat:HEAT 13	8	0.169456	0.023929	10985, 5518, 23066, 30000, 9989, 9670, 23392, 55832	4552	10	13191	2.31828	1	0.923504	38.6386
INTERPRO	IPR016159:Cullin repeat-like-containing domain	9	0.190638	0.0241622	149371, 8454, 738, 143384, 8453, 8451, 8450, 55615, 23265	4344	12	12512	2.16022	1	0.874332	37.0014
INTERPRO	IPR002857:Zinc finger, CXXC-type	9	0.190638	0.0241622	30827, 200424, 80312, 84678, 9757, 54620, 22992, 1786, 4297	4344	12	12512	2.16022	1	0.874332	37.0014
INTERPRO	IPR006569:CID domain	7	0.148274	0.0242192	23350, 23248, 51585, 22828, 58490, 55197, 10523	4344	8	12512	2.52026	1	0.870224	37.0709
INTERPRO	IPR002194:Chaperonin TCP-1, conserved site	7	0.148274	0.0242192	10575, 10576, 908, 10574, 6950, 22948, 7203	4344	8	12512	2.52026	1	0.870224	37.0709
GOTERM_BP_DIRECT	GO:0032922~circadian regulation of gene expression	26	0.550731	0.0242618	1453, 8553, 1454, 5187, 8204, 5465, 3192, 9500, 10514, 5927, 7150, 3398, 10419, 4297, 10499, 10743, 463, 8473, 9112, 5501, 468, 5499, 5500, 3065, 3066, 23411	4171	50	11756	1.46562	1	0.706506	38.2954
SMART	SM00717:SANT	22	0.466003	0.0243153	9611, 988, 6599, 114803, 6621, 26009, 55809, 57708, 93624, 8467, 23186, 4605, 57585, 166968, 9219, 9112, 55814, 7270, 9988, 6601, 55320, 27000	2429	41	6919	1.52846	1	0.585734	31.0883
INTERPRO	IPR000330:SNF2-related	18	0.381275	0.0246146	6595, 57634, 84181, 6597, 1108, 10847, 1106, 1107, 1105, 9557, 25788, 80205, 8467, 8458, 57680, 546, 375748, 55636	4344	32	12512	1.62017	1	0.869877	37.5508
GOTERM_BP_DIRECT	GO:0000079~regulation of cyclin-dependent protein serine/threonine kinase activity	20	0.423639	0.0247071	80279, 8851, 5728, 2810, 11140, 219771, 9088, 1027, 641, 23560, 81669, 995, 1022, 1031, 1647, 56647, 904, 905, 27013, 900	4171	36	11756	1.56584	1	0.71051	38.8466
INTERPRO	IPR019954:Ubiquitin conserved site	8	0.169456	0.0247725	2197, 4738, 7316, 8266, 56061, 7314, 6233, 7311	4344	10	12512	2.30424	1	0.866964	37.7415
INTERPRO	IPR003613:U box domain	8	0.169456	0.0247725	51070, 27339, 10277, 6737, 10273, 23759, 22888, 5930	4344	10	12512	2.30424	1	0.866964	37.7415
GOTERM_CC_DIRECT	GO:0002199~zona pellucida receptor complex	7	0.148274	0.024788	3305, 10575, 10576, 10574, 6950, 22948, 7203	4343	8	12453	2.50895	1	0.282196	33.1703
GOTERM_CC_DIRECT	GO:0005832~chaperonin-containing T-complex	7	0.148274	0.024788	10575, 10576, 908, 10574, 6950, 22948, 7203	4343	8	12453	2.50895	1	0.282196	33.1703
GOTERM_BP_DIRECT	GO:0042752~regulation of circadian rhythm	23	0.487185	0.0248401	9500, 1453, 4841, 1454, 5187, 8945, 3398, 7153, 1385, 6421, 7337, 5465, 7071, 8914, 5501, 3184, 5500, 5499, 26224, 5591, 9975, 9475, 23596	4171	43	11756	1.50757	1	0.709869	39.0103
GOTERM_CC_DIRECT	GO:0008540~proteasome regulatory particle, base subcomplex	9	0.190638	0.0248518	5708, 5706, 5707, 5704, 5710, 5705, 5702, 5701, 5716	4343	12	12453	2.15053	1	0.280071	33.2405
UP_SEQ_FEATURE	short sequence motif:Bipartite nuclear localization signal	14	0.296547	0.024935	1859, 3609, 11054, 10963, 284695, 10492, 7157, 4605, 162989, 8295, 23064, 10569, 3068, 80155	4552	23	13191	1.76391	1	0.929212	39.9013
KEGG_PATHWAY	hsa00310:Lysine degradation	27	0.571913	0.0250659	79723, 55904, 79709, 219, 5352, 5351, 10919, 4967, 3030, 224, 55870, 6839, 23067, 84444, 7468, 9739, 9757, 80854, 54904, 4297, 8085, 79813, 9869, 85007, 58508, 29072, 64324	1804	50	4809	1.4395	0.999365	0.335677	28.6427
GOTERM_CC_DIRECT	GO:0015630~microtubule cytoskeleton	54	1.14383	0.0253537	256364, 5127, 22974, 9927, 4924, 9793, 207, 10472, 9702, 9584, 8826, 23063, 10579, 9055, 10435, 5594, 10460, 23580, 121642, 6709, 6790, 667, 89927, 90417, 5515, 10011, 5518, 1130, 2597, 5347, 4134, 3399, 6472, 8481, 10982, 4139, 81930, 79441, 3735, 27436, 23623, 1062, 26586, 4171, 9371, 6674, 58526, 54487, 8914, 57606, 10121, 5432, 283431, 4281	4343	121	12453	1.27965	1	0.282164	33.79
GOTERM_CC_DIRECT	GO:0005687~U4 snRNP	8	0.169456	0.0254175	6628, 6637, 6636, 6633, 6634, 6632, 26121, 7919	4343	10	12453	2.2939	1	0.280086	33.8595
INTERPRO	IPR019775:WD40 repeat, conserved site	63	1.33446	0.0262445	7290, 1477, 57175, 54554, 197335, 1314, 10399, 25929, 26608, 27339, 8668, 26190, 79084, 55023, 54853, 11091, 51133, 79582, 84135, 9391, 30849, 5928, 55054, 10238, 26118, 64223, 25879, 64326, 57599, 25886, 134957, 23603, 5931, 84231, 5048, 8945, 79269, 2783, 11171, 2976, 80335, 5822, 51343, 348995, 1130, 6907, 9128, 11137, 1643, 57418, 55003, 51514, 83743, 10885, 27097, 27436, 8086, 11169, 2782, 5…	4344	145	12512	1.25144	1	0.877832	39.493
UP_KEYWORDS	Neuropathy	39	0.826096	0.0263588	56652, 10342, 9342, 5165, 25923, 7415, 16, 1785, 1786, 5611, 9927, 667, 55526, 23095, 60386, 23321, 5428, 50717, 8565, 22880, 3094, 2617, 3735, 22948, 1778, 7879, 65125, 5631, 91137, 26353, 10558, 9517, 9516, 4358, 1337, 64837, 4669, 9131, 4141	4583	84	13285	1.34585	1	0.193906	32.4826
GOTERM_BP_DIRECT	GO:0006122~mitochondrial electron transport, ubiquinol to cytochrome c	10	0.21182	0.0265697	29796, 54205, 4204, 790955, 7388, 440567, 7386, 10975, 27089, 7384	4171	14	11756	2.01322	1	0.731604	41.1019
GOTERM_MF_DIRECT	GO:0046933~proton-transporting ATP synthase activity, rotational mechanism	10	0.21182	0.0267484	513, 506, 509, 10632, 537, 518, 517, 498, 515, 527	4211	14	11857	2.01123	1	0.624588	37.4767
INTERPRO	IPR001841:Zinc finger, RING-type	93	1.96992	0.0267884	10206, 55905, 90850, 7844, 57534, 57674, 330, 55182, 10616, 25898, 51320, 25897, 5987, 29128, 9148, 64219, 23077, 10155, 56254, 25820, 51529, 51132, 79596, 11043, 84133, 11236, 10336, 4194, 672, 6737, 55298, 4193, 84447, 81847, 22888, 84900, 26001, 64326, 9867, 55658, 58508, 57661, 6015, 84333, 149603, 4850, 5930, 84851, 84231, 89970, 55159, 868, 81559, 56658, 10425, 22954, 254225, 7189, 55167, 7…	4344	224	12512	1.19584	1	0.878853	40.1284
GOTERM_BP_DIRECT	GO:1904871~positive regulation of protein localization to Cajal body	7	0.148274	0.0270792	10575, 10576, 908, 10574, 6950, 22948, 7203	4171	8	11756	2.4662	1	0.735881	41.7049
GOTERM_BP_DIRECT	GO:0002756~MyD88-independent toll-like receptor signaling pathway	7	0.148274	0.0270792	7189, 148022, 7099, 7316, 7314, 6233, 7311	4171	8	11756	2.4662	1	0.735881	41.7049
UP_SEQ_FEATURE	compositionally biased region:Poly-Gln	58	1.22855	0.0271547	6595, 7290, 114823, 23239, 57634, 7026, 9828, 10291, 159195, 6421, 23613, 1822, 1387, 2957, 9794, 4924, 678, 56993, 10140, 9611, 63977, 4841, 113263, 6304, 23476, 546, 10725, 134957, 6601, 7204, 4609, 5454, 10048, 2033, 9987, 6942, 6908, 8289, 7874, 5428, 2734, 23248, 64599, 55777, 9757, 10743, 7916, 10499, 463, 8805, 54014, 6670, 58525, 3667, 64207, 7716, 57186, 3064	4552	133	13191	1.26372	1	0.942335	42.6008
GOTERM_MF_DIRECT	GO:0008121~ubiquinol-cytochrome-c reductase activity	7	0.148274	0.027218	29796, 7388, 440567, 7386, 10975, 27089, 7384	4211	8	11857	2.46376	1	0.624896	37.9973
BIOCARTA	h_wntPathway:WNT Signaling Pathway	16	0.338911	0.0272882	595, 1487, 1453, 1452, 2932, 324, 8945, 6885, 1855, 1499, 5515, 8312, 1387, 3065, 4089, 4609	520	25	1324	1.62954	0.999613	0.480451	30.6933
GOTERM_BP_DIRECT	GO:0000731~DNA synthesis involved in DNA repair	19	0.402457	0.0274456	10524, 5429, 675, 5424, 672, 5426, 7516, 7156, 79728, 641, 80010, 472, 5422, 10111, 83990, 116028, 23411, 5932, 9156	4171	34	11756	1.57505	1	0.738185	42.135
GOTERM_BP_DIRECT	GO:0042254~ribosome biogenesis	19	0.402457	0.0274456	29889, 54552, 26164, 92345, 6130, 84273, 10171, 6164, 29102, 9816, 92170, 23481, 26574, 6175, 51187, 64979, 124995, 6222, 26354	4171	34	11756	1.57505	1	0.738185	42.135
GOTERM_BP_DIRECT	GO:0007043~cell-cell junction assembly	9	0.190638	0.0276577	154796, 51564, 6624, 201163, 7094, 8502, 10052, 7082, 84612	4171	12	11756	2.11388	1	0.738462	42.3826
GOTERM_BP_DIRECT	GO:0006119~oxidative phosphorylation	9	0.190638	0.0276577	513, 2395, 2631, 509, 4436, 7388, 79736, 400916, 7384	4171	12	11756	2.11388	1	0.738462	42.3826
KEGG_PATHWAY	hsa05206:MicroRNAs in cancer	62	1.31328	0.0276821	4853, 5894, 6464, 2744, 2475, 10298, 7168, 387, 1387, 23405, 9493, 3925, 3236, 3190, 6093, 4363, 4194, 672, 4193, 25, 57521, 4082, 2885, 472, 7078, 5598, 23411, 4609, 6654, 2033, 1956, 113130, 8091, 1027, 960, 1786, 27250, 7422, 6541, 5962, 4233, 1545, 595, 5728, 5154, 10253, 324, 8660, 54541, 7157, 1871, 4170, 7431, 1398, 7430, 994, 1399, 995, 10642, 3667, 900, 7057	1804	133	4809	1.24268	0.999709	0.348498	31.1468
UP_SEQ_FEATURE	transit peptide:Mitochondrion	170	3.60093	0.0277601	5166, 10797, 5165, 5162, 5160, 10295, 51081, 37, 2744, 5018, 56910, 1629, 124995, 10131, 128308, 5442, 64745, 3712, 55052, 56997, 7284, 4191, 63933, 1327, 10531, 54995, 4833, 123263, 23456, 84681, 64928, 8192, 751071, 1376, 85476, 92609, 9054, 84545, 8209, 55037, 6182, 9801, 5250, 23530, 51021, 1431, 219, 3313, 55316, 3029, 513, 55168, 22921, 54931, 3030, 3419, 51295, 55526, 9167, 23395, 6472, 29…	4552	434	13191	1.1351	1	0.944072	43.3168
GOTERM_MF_DIRECT	GO:0008270~zinc ion binding	345	7.30777	0.0279305	7750, 7205, 10206, 55748, 332, 330, 10898, 23650, 4898, 10616, 25792, 29128, 84678, 6497, 51773, 10713, 10336, 26009, 8028, 57215, 81847, 79813, 9869, 26001, 9867, 55658, 4122, 54799, 149603, 4502, 7738, 84085, 11083, 5252, 84295, 7227, 16, 81559, 7189, 7188, 7626, 7187, 22921, 7186, 23295, 23118, 221687, 284273, 55666, 55662, 23390, 90933, 5763, 79830, 811, 8427, 23522, 3837, 1465, 329, 55870, 2…	4211	893	11857	1.08782	1	0.628456	38.7792
GOTERM_MF_DIRECT	GO:0003730~mRNA 3'-UTR binding	22	0.466003	0.0279374	678, 90806, 677, 8531, 26135, 10236, 23367, 25946, 55544, 10643, 10644, 9698, 3183, 23435, 10642, 1994, 1153, 5936, 3181, 56254, 26986, 9810	4211	41	11857	1.51087	1	0.622567	38.7868
GOTERM_BP_DIRECT	GO:0006983~ER overload response	8	0.169456	0.0280287	54499, 1649, 2932, 57003, 84919, 7466, 3309, 7157	4171	10	11756	2.25481	1	0.740755	42.8132
UP_KEYWORDS	Kinetochore	42	0.889642	0.028357	8243, 84295, 11130, 1452, 92822, 284058, 332, 4735, 54908, 387103, 348235, 25909, 90417, 348995, 10615, 5347, 9793, 84516, 79003, 9770, 5905, 3619, 283489, 699, 11243, 79172, 64105, 25936, 1063, 1062, 23219, 7158, 79980, 57082, 91272, 7756, 7175, 5501, 9184, 151246, 23332, 201254	4583	92	13285	1.32335	1	0.204634	34.4917
GOTERM_BP_DIRECT	GO:0000245~spliceosomal complex assembly	15	0.317729	0.028517	7536, 6637, 6733, 79833, 6633, 6634, 23451, 10907, 27339, 25804, 6632, 9169, 10713, 6607, 7919	4171	25	11756	1.69111	1	0.744459	43.3753
UP_SEQ_FEATURE	binding site:S-adenosyl-L-methionine	24	0.508367	0.0287033	3276, 2091, 387338, 55783, 118881, 9836, 84444, 28989, 55170, 9757, 54888, 1312, 96764, 4297, 10919, 8085, 79813, 58508, 4548, 55006, 29960, 23070, 4837, 4839	4552	47	13191	1.47975	1	0.947598	44.4154
UP_KEYWORDS	Nucleosome core	19	0.402457	0.0288526	8969, 126961, 8338, 9555, 3014, 3015, 3017, 3021, 92815, 8364, 94239, 8336, 85236, 8334, 10061, 8358, 8367, 8330, 8356	4583	35	13285	1.57361	1	0.205358	34.9813
UP_KEYWORDS	Meiosis	19	0.402457	0.0288526	8243, 9319, 400629, 1017, 24149, 22933, 3014, 10927, 285498, 9126, 5515, 9724, 9184, 151246, 10111, 5932, 9156, 10735, 284071	4583	35	13285	1.57361	1	0.205358	34.9813
BIOCARTA	h_hSWI-SNFpathway:Chromatin Remodeling by hSWI/SNF ATP-dependent Complexes	12	0.254183	0.0289641	2962, 6599, 6598, 2960, 6597, 6908, 2908, 2957, 5430, 8289, 6601, 60	520	17	1324	1.79729	0.999763	0.473813	32.2591
INTERPRO	IPR010920:Like-Sm (LSM) domain	13	0.275365	0.0292369	6628, 6637, 25804, 26065, 6636, 84316, 84967, 6633, 27258, 6634, 27257, 6632, 51691	4344	21	12512	1.78304	1	0.896559	42.9108
UP_KEYWORDS	Respiratory chain	26	0.550731	0.0294441	29796, 4697, 4702, 10975, 4700, 4731, 27089, 126328, 4716, 4728, 4713, 4723, 4726, 4715, 4725, 25994, 440567, 4710, 55967, 54205, 4695, 4696, 7388, 4694, 7386, 7384	4583	52	13285	1.44938	1	0.206672	35.5612
GOTERM_BP_DIRECT	GO:0007179~transforming growth factor beta receptor signaling pathway	38	0.804914	0.0299416	3725, 57154, 4738, 7791, 5045, 57530, 25805, 7040, 387, 8239, 4090, 6498, 6497, 9040, 7046, 5829, 4091, 9958, 657, 2651, 7316, 6885, 1385, 7314, 3693, 6233, 7311, 409, 10370, 7071, 5590, 9518, 9110, 4088, 4089, 2022, 142, 4086	4171	80	11756	1.33879	1	0.759193	44.9855
GOTERM_BP_DIRECT	GO:0006368~transcription elongation from RNA polymerase II promoter	38	0.804914	0.0299416	5434, 5435, 6829, 51497, 5438, 6874, 6827, 404672, 1025, 11198, 6908, 2957, 6749, 2958, 6924, 5441, 54623, 83860, 55795, 79577, 6883, 23168, 1022, 2962, 6875, 84337, 2960, 22916, 904, 29072, 5431, 5430, 5433, 905, 5432, 11047, 2968, 2967	4171	80	11756	1.33879	1	0.759193	44.9855
UP_KEYWORDS	DNA recombination	32	0.677822	0.0302091	22976, 3148, 83444, 3146, 5893, 7516, 10856, 51377, 6421, 79728, 80119, 146956, 283899, 6117, 7520, 54780, 7528, 675, 4841, 79677, 328, 672, 56160, 8607, 3014, 27301, 3980, 10933, 2547, 23064, 79447, 5591	4583	67	13285	1.38448	1	0.209034	36.304
GOTERM_CC_DIRECT	GO:0035145~exon-exon junction complex	13	0.275365	0.030297	9967, 23293, 9939, 9775, 5411, 26019, 22794, 5976, 10284, 84305, 27291, 127933, 6426	4343	21	12453	1.77504	1	0.321811	38.9809
GOTERM_CC_DIRECT	GO:0030904~retromer complex	13	0.275365	0.030297	55737, 10807, 23258, 51699, 112936, 7879, 9559, 1639, 27131, 5987, 8724, 6643, 6642	4343	21	12453	1.77504	1	0.321811	38.9809
SMART	SM00398:HMG	20	0.423639	0.0304766	56987, 3148, 3149, 3146, 6659, 7468, 23152, 10363, 10362, 6666, 55193, 8085, 11169, 58508, 7343, 7019, 6749, 10042, 6662, 6934	2429	37	6919	1.53973	1	0.651902	37.3851
GOTERM_MF_DIRECT	GO:0051219~phosphoprotein binding	18	0.381275	0.0308023	11043, 9967, 84295, 2810, 7529, 5589, 1455, 8535, 114787, 5048, 10670, 2288, 2475, 26608, 3482, 8725, 7531, 4281	4211	32	11857	1.58384	1	0.653122	41.8377
GOTERM_CC_DIRECT	GO:0032154~cleavage furrow	22	0.466003	0.0308303	1894, 9600, 84930, 4735, 382, 23011, 54434, 55165, 388, 4638, 387, 84501, 4627, 5501, 4221, 5586, 4771, 4628, 5962, 56907, 51474, 10733	4343	42	12453	1.50196	1	0.323571	39.5174
GOTERM_BP_DIRECT	GO:0051881~regulation of mitochondrial membrane potential	14	0.296547	0.0314609	6647, 1192, 598, 581, 55186, 7314, 27166, 5831, 11315, 79680, 10935, 80025, 11334, 23111	4171	23	11756	1.71561	1	0.773946	46.6547
UP_KEYWORDS	S-adenosyl-L-methionine	66	1.39801	0.0315683	127253, 57721, 2091, 55783, 55904, 1312, 10919, 23463, 57570, 23070, 56257, 27037, 63977, 6839, 23067, 152992, 84444, 28989, 56339, 9739, 79918, 96764, 60487, 4297, 79813, 9869, 10436, 58508, 4548, 29072, 144233, 4837, 64324, 55039, 4839, 262, 117246, 79723, 387338, 11108, 10322, 55316, 7799, 339175, 54888, 1786, 6894, 54931, 90826, 55006, 3276, 51409, 55870, 118881, 9836, 7468, 10419, 55170, 975…	4583	155	13285	1.23431	1	0.214974	37.6041
UP_KEYWORDS	Tumor suppressor	66	1.39801	0.0315683	23239, 6598, 7249, 23612, 388, 23136, 9148, 23035, 54623, 675, 5411, 26524, 672, 201163, 581, 55193, 5921, 1942, 9821, 10769, 10664, 7248, 9113, 84897, 8312, 472, 5934, 55615, 9052, 11334, 55654, 1601, 2132, 2131, 6794, 1027, 83593, 27250, 79728, 23196, 27316, 1801, 1540, 3659, 4094, 84260, 23390, 9770, 8994, 5728, 4013, 79577, 4436, 7428, 324, 5727, 7157, 11315, 8805, 6389, 25855, 10641, 4771, 1…	4583	155	13285	1.23431	1	0.214974	37.6041
GOTERM_MF_DIRECT	GO:0003678~DNA helicase activity	14	0.296547	0.0317223	4173, 4172, 4175, 57680, 4174, 4176, 546, 10856, 9400, 8607, 23064, 25788, 4171, 80119	4211	23	11857	1.71392	1	0.658317	42.7866
GOTERM_MF_DIRECT	GO:0050699~WW domain binding	14	0.296547	0.0317223	9802, 9618, 54602, 1785, 55740, 995, 51729, 9585, 51186, 90843, 51246, 79921, 9516, 9338	4211	23	11857	1.71392	1	0.658317	42.7866
KEGG_PATHWAY	hsa05169:Epstein-Barr virus infection	50	1.0591	0.0324722	3725, 5717, 5718, 3661, 6300, 5710, 1027, 9861, 960, 5713, 3383, 7189, 7188, 6416, 7187, 7186, 3516, 8737, 3107, 23118, 3134, 3654, 3133, 7874, 3105, 5600, 5708, 5606, 5709, 5706, 5707, 5704, 5609, 1017, 5705, 4193, 5702, 6885, 3716, 7979, 5701, 207, 7157, 208, 7431, 3065, 3066, 5295, 5296, 4609	1804	105	4809	1.2694	0.99993	0.380388	35.5221
GOTERM_CC_DIRECT	GO:0031982~vesicle	46	0.97437	0.0326388	4043, 2580, 29952, 805, 1192, 1889, 9368, 966, 83871, 801, 3783, 9829, 2783, 1072, 10409, 10540, 8301, 2950, 387, 4637, 2597, 79026, 7086, 84790, 6642, 2040, 221, 27342, 8407, 301, 128866, 84445, 207, 975, 4282, 7430, 4478, 9181, 9559, 5590, 2665, 808, 1471, 5315, 23603, 9052	4343	102	12453	1.29313	1	0.336179	41.3044
UP_SEQ_FEATURE	domain:Thioredoxin	15	0.317729	0.0332349	169714, 79770, 10539, 7295, 9997, 10549, 7001, 5052, 51075, 9588, 81542, 10935, 64359, 56255, 374354	4552	26	13191	1.67183	1	0.966069	49.4175
GOTERM_BP_DIRECT	GO:0045444~fat cell differentiation	28	0.593095	0.033386	8554, 2033, 2932, 84498, 114882, 8091, 22954, 26268, 64318, 2876, 84159, 59343, 1052, 4929, 4091, 51150, 595, 2308, 208, 5469, 25836, 114885, 7840, 6720, 84230, 144404, 9314, 6934	4171	56	11756	1.40925	1	0.791717	48.7008
GOTERM_BP_DIRECT	GO:0006363~termination of RNA polymerase I transcription	17	0.360093	0.0339182	5434, 5435, 79101, 404672, 51082, 284119, 64425, 1022, 7343, 25885, 6908, 84172, 7270, 9013, 2968, 5441, 2967	4171	30	11756	1.59715	1	0.794767	49.2532
UP_KEYWORDS	Leigh syndrome	11	0.233001	0.0345469	123263, 5428, 55967, 10128, 6389, 4728, 51204, 4697, 9997, 5160, 4723	4583	17	13285	1.87567	1	0.230397	40.3673
UP_SEQ_FEATURE	repeat:ARM 7	11	0.233001	0.0346211	25852, 3836, 1500, 3839, 3838, 324, 8502, 23633, 79798, 1499, 8615	4552	17	13191	1.87508	1	0.969421	50.8601
UP_SEQ_FEATURE	domain:SANT	11	0.233001	0.0346211	6599, 57585, 166968, 9219, 114803, 9112, 6601, 55809, 57708, 55320, 93624	4552	17	13191	1.87508	1	0.969421	50.8601
GOTERM_CC_DIRECT	GO:0072686~mitotic spindle	21	0.444821	0.0346429	1894, 5905, 55689, 22933, 3835, 6188, 6790, 9700, 8655, 2648, 983, 90417, 1729, 84861, 4926, 7175, 10615, 9493, 4134, 8502, 5594	4343	40	12453	1.50537	1	0.349926	43.2267
GOTERM_BP_DIRECT	GO:0000083~regulation of transcription involved in G1/S transition of mitotic cell cycle	13	0.275365	0.0346718	4863, 81620, 23476, 571, 8462, 5422, 7298, 6241, 2672, 8318, 5111, 26271, 983	4171	21	11756	1.74479	1	0.799837	50.0257
GOTERM_BP_DIRECT	GO:0022604~regulation of cell morphogenesis	13	0.275365	0.0346718	7750, 9202, 54870, 152503, 114793, 9203, 9204, 118987, 55023, 54764, 5879, 1072, 113251	4171	21	11756	1.74479	1	0.799837	50.0257
GOTERM_BP_DIRECT	GO:0000060~protein import into nucleus, translocation	13	0.275365	0.0346718	26953, 3837, 10952, 3843, 30000, 3842, 207, 10204, 5901, 7040, 9702, 11331, 602	4171	21	11756	1.74479	1	0.799837	50.0257
GOTERM_BP_DIRECT	GO:0006607~NLS-bearing protein import into nucleus	13	0.275365	0.0346718	26953, 3837, 3836, 7227, 3839, 3838, 868, 30000, 3843, 1605, 3842, 23633, 5903	4171	21	11756	1.74479	1	0.799837	50.0257
UP_KEYWORDS	Aminoacyl-tRNA synthetase	20	0.423639	0.0349064	55157, 8565, 5917, 6301, 2617, 3735, 51520, 7407, 51067, 16, 3376, 92935, 833, 6897, 4677, 23395, 5859, 124454, 2058, 4141	4583	38	13285	1.52566	1	0.229953	40.693
UP_KEYWORDS	Hydrogen ion transport	20	0.423639	0.0349064	506, 9550, 509, 23041, 155066, 9296, 9551, 498, 513, 522, 521, 523, 535, 10632, 8992, 537, 518, 517, 515, 527	4583	38	13285	1.52566	1	0.229953	40.693
GOTERM_MF_DIRECT	GO:0017025~TBP-class protein binding	13	0.275365	0.0349426	55689, 1810, 5706, 3185, 2957, 5704, 23066, 6883, 5705, 5702, 2958, 5701, 55832	4211	21	11857	1.74307	1	0.688582	45.9946
UP_KEYWORDS	ER-Golgi transport	40	0.847278	0.0350179	10972, 10897, 5870, 22818, 22872, 3998, 1314, 381, 382, 57222, 8615, 10959, 10427, 10652, 51614, 10945, 11014, 81555, 9632, 9527, 10175, 10113, 10802, 10134, 9919, 5862, 375056, 9276, 10313, 55738, 372, 22820, 60561, 51128, 375, 377, 29097, 7109, 56681, 26984	4583	88	13285	1.31762	1	0.228082	40.7937
GOTERM_BP_DIRECT	GO:0051726~regulation of cell cycle	50	1.0591	0.035824	5128, 3725, 55787, 5127, 84930, 1192, 7249, 10399, 22933, 3726, 9698, 8021, 1487, 63979, 2122, 5928, 84444, 65979, 4605, 7248, 80139, 472, 5934, 6651, 2033, 51755, 8945, 3312, 23481, 1647, 5347, 3399, 3659, 104, 51514, 10983, 5728, 329, 6430, 9088, 7465, 2305, 1063, 5469, 899, 995, 23435, 891, 10600, 900	4171	111	11756	1.2696	1	0.808344	51.1853
GOTERM_CC_DIRECT	GO:0032040~small-subunit processome	18	0.381275	0.0361972	65083, 2091, 55127, 10885, 10528, 9277, 11103, 57050, 22984, 92856, 8602, 10436, 51602, 25879, 6201, 5822, 9724, 55272	4343	33	12453	1.56402	1	0.359535	44.6767
GOTERM_BP_DIRECT	GO:0019886~antigen processing and presentation of exogenous peptide antigen via MHC class II	36	0.76255	0.0364577	22872, 140735, 1785, 24137, 821, 10540, 8655, 10427, 7189, 9493, 9632, 3796, 1509, 84516, 1173, 10802, 56992, 81930, 3832, 3835, 1062, 1778, 79659, 3831, 7879, 9371, 1514, 51128, 163, 164, 1639, 375, 1211, 1213, 10121, 64837	4171	76	11756	1.33508	1	0.811896	51.8121
UP_SEQ_FEATURE	zinc finger region:C2H2-type 1; atypical	17	0.360093	0.0370275	57473, 7546, 57541, 9278, 63976, 7227, 11108, 22890, 57659, 147657, 80110, 29803, 9640, 23126, 51427, 85416, 23099	4552	31	13191	1.58914	1	0.975102	53.272
BIOCARTA	h_ranPathway:Cycling of Ran in nucleocytoplasmic transport	6	0.127092	0.0370604	5905, 1104, 5901, 8420, 5902, 5903	520	6	1324	2.54615	0.999978	0.535169	39.373
GOTERM_BP_DIRECT	GO:0006366~transcription from RNA polymerase II promoter	164	3.47384	0.0372182	8880, 3725, 7494, 689, 5434, 688, 5435, 7753, 4205, 5438, 6621, 6874, 23650, 2648, 3726, 2295, 10691, 2296, 10488, 10923, 2957, 4212, 2958, 6495, 10153, 5441, 3202, 3204, 3206, 83860, 3097, 3091, 6883, 8939, 1385, 4298, 4297, 51621, 10915, 409, 6879, 4605, 27125, 57661, 6875, 10725, 4609, 5454, 4779, 64710, 7227, 51497, 4774, 8861, 4775, 51193, 404672, 10522, 28999, 27316, 1997, 4802, 4800, 51804…	4171	410	11756	1.1274	1	0.816425	52.5543
GOTERM_CC_DIRECT	GO:0080008~Cul4-RING E3 ubiquitin ligase complex	11	0.233001	0.0372363	50717, 25879, 9616, 55827, 8451, 54876, 10238, 79269, 1643, 54461, 1642	4343	17	12453	1.85536	1	0.364771	45.6267
UP_SEQ_FEATURE	zinc finger region:C3H1-type	14	0.296547	0.0375315	196441, 90957, 54439, 80742, 64062, 25976, 124245, 5514, 23091, 9931, 85463, 11097, 4850, 114034	4552	24	13191	1.69041	1	0.975352	53.7627
GOTERM_BP_DIRECT	GO:1900740~positive regulation of protein insertion into mitochondrial membrane involved in apoptotic signaling pathway	16	0.338911	0.0377368	10971, 2810, 7529, 7027, 51100, 140735, 7159, 7157, 8655, 5534, 5366, 4836, 7534, 7533, 7532, 7531	4171	28	11756	1.61058	1	0.818781	53.0541
GOTERM_BP_DIRECT	GO:0001756~somitogenesis	16	0.338911	0.0377368	657, 2033, 7516, 57534, 2303, 5663, 7474, 79728, 2648, 23509, 2296, 3516, 10006, 472, 4088, 5591	4171	28	11756	1.61058	1	0.818781	53.0541
GOTERM_BP_DIRECT	GO:0050434~positive regulation of viral transcription	16	0.338911	0.0377368	5434, 5435, 51497, 6829, 5438, 6827, 1025, 2962, 904, 5431, 5430, 5433, 5432, 51773, 5216, 5441	4171	28	11756	1.61058	1	0.818781	53.0541
GOTERM_BP_DIRECT	GO:0043153~entrainment of circadian clock by photoperiod	12	0.254183	0.0381504	2063, 8553, 9112, 5501, 5499, 5500, 5187, 150094, 3398, 26224, 5936, 7157	4171	19	11756	1.78011	1	0.820215	53.4492
GOTERM_BP_DIRECT	GO:0070987~error-free translesion synthesis	12	0.254183	0.0381504	5429, 25898, 5985, 6117, 7415, 55666, 7316, 5111, 7314, 6233, 7311, 83932	4171	19	11756	1.78011	1	0.820215	53.4492
GOTERM_BP_DIRECT	GO:0030838~positive regulation of actin filament polymerization	19	0.402457	0.0381575	2017, 23580, 9530, 382, 55243, 4641, 3383, 2475, 64223, 10602, 10458, 2885, 253260, 55604, 5879, 11135, 5216, 10435, 4690	4171	35	11756	1.53005	1	0.818285	53.4559
GOTERM_MF_DIRECT	GO:0032403~protein complex binding	81	1.71574	0.0385688	23510, 60673, 4697, 55845, 3476, 5479, 192111, 2192, 8772, 8837, 8737, 9798, 6498, 55604, 10657, 55719, 10134, 10163, 5792, 201163, 2908, 8936, 57521, 7289, 51160, 3856, 409, 10769, 163, 8453, 10006, 7247, 8826, 5501, 5499, 472, 7386, 4609, 7384, 10972, 25942, 9531, 5250, 9368, 1373, 114803, 5048, 7416, 5082, 4702, 1027, 1785, 1605, 2783, 5520, 5189, 5465, 7186, 3030, 197259, 4678, 10736, 9810, 5…	4211	191	11857	1.1941	1	0.719323	49.4038
SMART	SM00343:ZnF_C2HC	11	0.233001	0.0388342	7536, 23318, 54877, 5936, 85364, 10898, 85437, 5930, 7555, 23174, 55596	2429	17	6919	1.84315	1	0.724474	45.0708
GOTERM_CC_DIRECT	GO:0032580~Golgi cisterna membrane	31	0.656641	0.039049	11070, 9600, 79586, 27333, 22856, 23011, 51107, 10959, 283358, 170384, 80146, 55454, 81555, 2526, 4924, 10134, 338707, 126792, 55204, 64083, 55851, 124583, 2802, 54480, 2590, 2589, 51128, 6483, 8703, 9334, 56623	4343	65	12453	1.36752	1	0.375837	47.2474
BIOCARTA	h_rhoPathway:Rho cell motility signaling pathway	17	0.360093	0.0398182	6093, 394, 7414, 8394, 1072, 10092, 3984, 10552, 1729, 10458, 10097, 4638, 387, 7984, 10094, 7094, 5216	520	28	1324	1.54588	0.99999	0.536668	41.6339
INTERPRO	IPR001412:Aminoacyl-tRNA synthetase, class I, conserved site	10	0.21182	0.0399315	5917, 51520, 23395, 51067, 7407, 5859, 3376, 124454, 4141, 2058	4344	15	12512	1.9202	1	0.953369	53.6908
UP_KEYWORDS	Proto-oncogene	83	1.7581	0.0399906	3725, 4302, 79184, 4301, 10342, 22872, 5894, 57674, 60528, 92521, 6491, 6929, 387, 5987, 7994, 6418, 607, 6497, 602, 8021, 4218, 81620, 11040, 415116, 2122, 6455, 64783, 23365, 8028, 4193, 25, 4298, 833, 4297, 207, 208, 5546, 4299, 27125, 1656, 7175, 7984, 2114, 64324, 4609, 861, 5108, 81610, 2130, 8030, 865, 1956, 8031, 10272, 8091, 6790, 8301, 8148, 369, 1649, 57018, 4094, 2521, 4233, 595, 694,…	4583	202	13285	1.19107	1	0.253783	45.1249
GOTERM_CC_DIRECT	GO:0071011~precatalytic spliceosome	14	0.296547	0.0408426	6637, 83443, 6633, 6634, 6625, 26121, 10992, 84950, 10286, 27258, 51639, 11066, 6632, 6651	4343	24	12453	1.67263	1	0.38637	48.8063
GOTERM_CC_DIRECT	GO:0045111~intermediate filament cytoskeleton	22	0.466003	0.0409051	6595, 1198, 3209, 10273, 29115, 1107, 51649, 27158, 23650, 26284, 1497, 5716, 667, 90102, 5339, 23195, 7431, 9867, 51447, 5586, 7095, 10735	4343	43	12453	1.46703	1	0.383771	48.8598
GOTERM_MF_DIRECT	GO:0008168~methyltransferase activity	39	0.826096	0.0411158	127253, 57721, 79723, 2091, 387338, 11108, 55783, 10322, 8721, 131965, 339175, 22992, 1312, 1786, 55471, 6470, 90826, 6472, 57019, 64745, 3276, 63977, 23210, 80745, 23067, 10419, 28989, 56339, 60487, 54482, 8085, 79813, 51603, 10436, 751071, 58508, 124512, 29960, 4839	4211	84	11857	1.3073	1	0.737105	51.6761
GOTERM_BP_DIRECT	GO:0045862~positive regulation of proteolysis	11	0.233001	0.0418798	54998, 8473, 8772, 64065, 54982, 5347, 9798, 8945, 3066, 26999, 22954	4171	17	11756	1.82374	1	0.844846	56.8718
GOTERM_BP_DIRECT	GO:0015986~ATP synthesis coupled proton transport	11	0.233001	0.0418798	522, 513, 506, 535, 509, 23041, 10632, 518, 517, 498, 515	4171	17	11756	1.82374	1	0.844846	56.8718
GOTERM_BP_DIRECT	GO:0000289~nuclear-transcribed mRNA poly(A) tail shortening	15	0.317729	0.0420093	255967, 57472, 85456, 1981, 9775, 23019, 1974, 1975, 55571, 4850, 29883, 9337, 23034, 26986, 114034	4171	26	11756	1.62606	1	0.843921	56.9863
GOTERM_BP_DIRECT	GO:0045787~positive regulation of cell cycle	15	0.317729	0.0420093	811, 595, 26057, 6733, 4040, 221477, 6737, 1019, 1027, 22954, 10370, 6929, 4609, 3054, 6926	4171	26	11756	1.62606	1	0.843921	56.9863
GOTERM_BP_DIRECT	GO:0097421~liver regeneration	15	0.317729	0.0420093	595, 6143, 1956, 6430, 6161, 6217, 7298, 10419, 6790, 6229, 1051, 7040, 5111, 4609, 6426	4171	26	11756	1.62606	1	0.843921	56.9863
UP_KEYWORDS	ATP synthesis	9	0.190638	0.0423252	513, 521, 506, 509, 23041, 10632, 790955, 9551, 498	4583	13	13285	2.00683	1	0.263924	47.0548
GOTERM_MF_DIRECT	GO:0001103~RNA polymerase II repressing transcription factor binding	15	0.317729	0.0423603	25942, 1108, 6667, 79738, 10915, 5465, 3516, 9219, 9112, 6908, 3065, 3066, 2958, 5932, 6934	4211	26	11857	1.62445	1	0.742586	52.751
GOTERM_MF_DIRECT	GO:0035035~histone acetyltransferase binding	15	0.317729	0.0423603	10370, 1051, 23741, 6879, 1958, 4205, 51341, 3091, 284058, 151050, 22933, 1385, 5111, 6667, 7157	4211	26	11857	1.62445	1	0.742586	52.751
UP_SEQ_FEATURE	repeat:ARM 9	9	0.190638	0.0424023	25852, 3836, 1500, 3839, 3838, 8502, 23633, 1499, 8615	4552	13	13191	2.0062	1	0.984214	58.2592
GOTERM_BP_DIRECT	GO:0006370~7-methylguanosine mRNA capping	18	0.381275	0.0425629	5434, 5435, 6829, 5438, 55783, 55421, 404672, 1022, 2962, 22916, 5431, 5430, 5433, 5432, 23070, 2968, 5441, 2967	4171	33	11756	1.53737	1	0.845964	57.4723
GOTERM_CC_DIRECT	GO:0005811~lipid particle	26	0.550731	0.0430169	9600, 10970, 7415, 10226, 7189, 79888, 23197, 27339, 1727, 2597, 3654, 10131, 63874, 23111, 10134, 123, 857, 7879, 10280, 8729, 1676, 57104, 29803, 29923, 2181, 2182	4343	53	12453	1.40664	1	0.396216	50.6382
UP_SEQ_FEATURE	compositionally biased region:Pro-rich	283	5.99449	0.0435605	8880, 29123, 4204, 80742, 3280, 23513, 6621, 55740, 221937, 124245, 197407, 22904, 10488, 84678, 64689, 607, 79080, 602, 8871, 118987, 54991, 25, 23505, 27, 8729, 26003, 342371, 56928, 6601, 23126, 11083, 51593, 54880, 55728, 92345, 163782, 359948, 23013, 54476, 152485, 23117, 23112, 23524, 338707, 286262, 375056, 55870, 55201, 54877, 10318, 65124, 84876, 85456, 610, 10749, 8848, 6599, 55904, 779…	4552	753	13191	1.0891	1	0.985281	59.2654
INTERPRO	IPR004161:Translation elongation factor EFTu/EF1A, domain 2	9	0.190638	0.0439326	10767, 9343, 1938, 7284, 2935, 1968, 85476, 1915, 9669	4344	13	12512	1.99405	1	0.964064	57.2039
INTERPRO	IPR011991:Winged helix-turn-helix DNA-binding domain	73	1.54628	0.0439419	51574, 6599, 8533, 2005, 7027, 55132, 3005, 3006, 113510, 9861, 5990, 3008, 10480, 641, 113251, 221937, 2295, 2296, 7994, 27335, 5885, 8971, 23304, 23020, 81620, 5709, 9400, 23367, 200576, 1855, 5036, 3297, 8454, 8453, 6223, 8451, 8450, 23028, 6601, 2114, 29882, 3646, 6741, 2119, 5717, 5718, 3661, 9318, 10973, 3607, 114803, 27086, 2873, 1997, 3659, 103, 64864, 1999, 196528, 65992, 2551, 23522, 23…	4344	175	12512	1.20149	1	0.962174	57.2118
GOTERM_BP_DIRECT	GO:0000724~double-strand break repair via homologous recombination	32	0.677822	0.0440417	64710, 7515, 7516, 2072, 113510, 348654, 9907, 6421, 79728, 55218, 641, 6117, 10111, 7528, 675, 23503, 79677, 672, 9400, 25788, 7979, 3014, 3980, 10933, 253714, 2237, 10721, 57599, 472, 79035, 142, 5932	4171	67	11756	1.34615	1	0.854116	58.7451
GOTERM_BP_DIRECT	GO:0008584~male gonad development	32	0.677822	0.0440417	8531, 3148, 10549, 8031, 6240, 10272, 8091, 666, 7474, 84159, 51804, 2175, 4678, 8894, 7046, 6662, 259266, 2067, 5927, 598, 4201, 3206, 3207, 4436, 3157, 3021, 10370, 4521, 26471, 7812, 23598, 1495	4171	67	11756	1.34615	1	0.854116	58.7451
INTERPRO	IPR001876:Zinc finger, RanBP2-type	13	0.275365	0.0443874	10616, 2130, 8148, 4194, 23118, 55247, 55666, 6650, 4193, 9972, 54764, 2521, 5903	4344	22	12512	1.70199	1	0.961528	57.5869
GOTERM_BP_DIRECT	GO:0006890~retrograde vesicle-mediated transport, Golgi to ER	36	0.76255	0.0445805	11070, 10972, 5870, 54732, 22818, 1314, 381, 24137, 10959, 10945, 11014, 9493, 3796, 11079, 55204, 56992, 64083, 9276, 81930, 55738, 10960, 3832, 3835, 372, 6836, 1062, 3831, 9371, 22820, 60561, 8729, 377, 23760, 10749, 64837, 3064	4171	77	11756	1.31774	1	0.855854	59.1997
INTERPRO	IPR012336:Thioredoxin-like fold	42	0.889642	0.0450653	10130, 9601, 1192, 7295, 10549, 493869, 7001, 1937, 6341, 7296, 5082, 83442, 373156, 51061, 23197, 2950, 2876, 64359, 140606, 23190, 56255, 374354, 169714, 9521, 51218, 79770, 10539, 2923, 9997, 10961, 64432, 5034, 84061, 5052, 10907, 51075, 9588, 81542, 10935, 4695, 84545, 4141	4344	94	12512	1.28694	1	0.961558	58.1516
GOTERM_CC_DIRECT	GO:0000974~Prp19 complex	9	0.190638	0.0451024	57461, 988, 27339, 11338, 10286, 5430, 56259, 3312, 25949	4343	13	12453	1.9851	1	0.408017	52.3373
GOTERM_CC_DIRECT	GO:0031012~extracellular matrix	89	1.88519	0.0455499	1290, 9349, 9343, 1191, 1938, 2335, 6205, 6165, 6208, 6421, 10383, 2192, 8364, 1289, 3192, 80781, 3190, 8367, 506, 4218, 7837, 6647, 1893, 375790, 6217, 6155, 3309, 5034, 6156, 10576, 3490, 3491, 6224, 6223, 3915, 6222, 1655, 71, 3911, 6191, 3912, 5315, 7078, 5591, 6193, 5879, 3959, 4023, 6184, 10970, 2316, 3313, 1690, 2317, 3312, 821, 6188, 1072, 7040, 90187, 3030, 4637, 3320, 5654, 23193, 2597,…	4343	217	12453	1.17602	1	0.408065	52.6947
GOTERM_BP_DIRECT	GO:0030330~DNA damage response, signal transduction by p53 class mediator	10	0.21182	0.0458109	4282, 22976, 4194, 9100, 2309, 546, 83667, 51499, 7157, 602	4171	15	11756	1.87901	1	0.861843	60.2203
GOTERM_BP_DIRECT	GO:0006376~mRNA splice site selection	10	0.21182	0.0458109	27316, 51631, 6430, 91746, 23064, 8996, 10658, 8683, 51747, 6426	4171	15	11756	1.87901	1	0.861843	60.2203
GOTERM_BP_DIRECT	GO:0006337~nucleosome disassembly	10	0.21182	0.0458109	11198, 6599, 6598, 92815, 6597, 6418, 8289, 6601, 3159, 196528	4171	15	11756	1.87901	1	0.861843	60.2203
KEGG_PATHWAY	hsa05130:Pathogenic Escherichia coli infection	23	0.487185	0.0460578	6093, 2017, 25, 10376, 1499, 10092, 10383, 7430, 9181, 10552, 387, 7099, 84617, 81873, 10094, 203068, 84790, 2534, 71, 60, 4691, 9475, 4690	1804	43	4809	1.42586	0.999999	0.478554	46.5721
GOTERM_MF_DIRECT	GO:0019789~SUMO transferase activity	10	0.21182	0.0460991	51564, 8554, 285498, 8535, 4193, 51588, 6613, 10210, 9063, 5903	4211	15	11857	1.87715	1	0.767362	55.8465
GOTERM_BP_DIRECT	GO:0043525~positive regulation of neuron apoptotic process	20	0.423639	0.0462219	3725, 8851, 5300, 6733, 2045, 2309, 581, 25, 7157, 7020, 1499, 5366, 835, 997, 6416, 468, 1649, 472, 9040, 9131	4171	38	11756	1.48343	1	0.86266	60.5558
GOTERM_BP_DIRECT	GO:0009411~response to UV	20	0.423639	0.0462219	840, 6738, 5424, 5609, 2072, 5366, 7319, 22954, 7320, 7391, 54962, 51455, 10277, 4221, 1153, 1643, 2956, 7398, 83932, 51514	4171	38	11756	1.48343	1	0.86266	60.5558
GOTERM_MF_DIRECT	GO:0031072~heat shock protein binding	20	0.423639	0.0466783	3305, 1936, 3304, 54880, 11140, 10960, 3312, 3326, 10294, 2288, 5536, 3297, 1616, 3984, 7266, 4967, 7175, 7019, 3066, 3654	4211	38	11857	1.48196	1	0.766819	56.3086
GOTERM_BP_DIRECT	GO:0000732~strand displacement	14	0.296547	0.046793	10524, 675, 672, 80010, 7516, 472, 7156, 10111, 83990, 116028, 5932, 9156, 79728, 641	4171	24	11756	1.64413	1	0.864416	61.0175
KEGG_PATHWAY	hsa05203:Viral carcinogenesis	70	1.48274	0.0471382	3725, 1108, 23513, 983, 2648, 1388, 387, 10488, 1387, 3107, 8364, 2957, 3190, 2958, 81, 8367, 87, 3105, 51564, 581, 4193, 1385, 3716, 5366, 7337, 2885, 1654, 5934, 5315, 5879, 5594, 10971, 3661, 2033, 9261, 1027, 7419, 7188, 23352, 7187, 7186, 3516, 6908, 3134, 3133, 5829, 7874, 1642, 4055, 595, 7529, 1017, 1019, 7157, 5902, 3017, 1960, 2960, 468, 7534, 3065, 7533, 3066, 7532, 85236, 7531, 5295, …	1804	156	4809	1.19617	0.999999	0.470853	47.371
INTERPRO	IPR007125:Histone core	18	0.381275	0.0474343	8969, 126961, 8338, 9555, 3014, 3015, 3017, 3021, 92815, 94239, 8336, 85236, 8334, 10061, 8358, 6654, 8330, 8356	4344	34	12512	1.52486	1	0.96605	60.07
GOTERM_BP_DIRECT	GO:1901998~toxin transport	17	0.360093	0.0475217	9364, 4040, 22818, 3301, 9276, 54545, 6950, 3309, 22948, 10575, 10576, 55823, 535, 8829, 10574, 8289, 7203	4171	31	11756	1.54563	1	0.867045	61.5991
GOTERM_BP_DIRECT	GO:0000381~regulation of alternative mRNA splicing, via spliceosome	17	0.360093	0.0475217	1859, 9967, 9939, 10150, 10291, 140890, 10284, 127933, 5725, 9589, 27316, 1655, 3191, 58517, 5936, 29890, 6427	4171	31	11756	1.54563	1	0.867045	61.5991
GOTERM_BP_DIRECT	GO:0000462~maturation of SSU-rRNA from tricistronic rRNA transcript (SSU-rRNA, 5.8S rRNA, LSU-rRNA)	17	0.360093	0.0475217	55127, 10885, 9277, 11103, 6217, 57050, 6208, 8602, 10436, 6229, 9790, 88745, 6202, 29080, 25879, 5822, 6223	4171	31	11756	1.54563	1	0.867045	61.5991
INTERPRO	IPR003689:Zinc/iron permease	8	0.169456	0.0479101	7922, 201266, 27173, 23516, 55334, 29985, 57181, 25800	4344	11	12512	2.09476	1	0.965521	60.445
UP_SEQ_FEATURE	repeat:16	12	0.254183	0.0479603	6238, 4670, 2055, 9500, 2130, 8148, 4288, 7840, 4134, 5430, 8661, 400566	4552	20	13191	1.73871	1	0.990007	62.882
SMART	SM00240:FHA	13	0.275365	0.0480451	4301, 79753, 3607, 9928, 283638, 221937, 5511, 9859, 6941, 9025, 4288, 7871, 23095	2429	22	6919	1.6832	1	0.784067	52.5161
GOTERM_CC_DIRECT	GO:0005874~microtubule	103	2.18174	0.0483323	256364, 84276, 332, 3476, 22974, 2288, 23710, 9928, 10540, 9859, 23271, 27130, 3925, 9654, 56992, 10808, 7283, 55755, 283349, 7203, 55920, 51203, 2622, 22919, 1785, 6950, 8655, 84790, 23116, 3796, 23095, 10112, 10801, 10513, 79441, 55201, 3833, 324, 3832, 3835, 8661, 1062, 23623, 1778, 3831, 9371, 10128, 9181, 1639, 908, 58526, 84617, 203068, 10749, 54801, 23172, 22933, 85378, 24137, 10383, 9493,…	4343	255	12453	1.15819	1	0.424049	54.861
BIOCARTA	h_p35AlzheimersPathway:Deregulation of CDK5 in Alzheimers Disease	8	0.169456	0.0484066	8851, 823, 1453, 1452, 5515, 826, 2932, 351	520	10	1324	2.03692	0.999999	0.585512	48.1853
GOTERM_BP_DIRECT	GO:1903955~positive regulation of protein targeting to mitochondrion	31	0.656641	0.0487048	6721, 1459, 3280, 51100, 59286, 10425, 2648, 56910, 7332, 84327, 51729, 9776, 5326, 85465, 58480, 3305, 9520, 7855, 79753, 10055, 9277, 8607, 9917, 5695, 6158, 10075, 7307, 11338, 55823, 7323, 79778	4171	65	11756	1.34421	1	0.872136	62.526
GOTERM_BP_DIRECT	GO:0042795~snRNA transcription from RNA polymerase II promoter	33	0.699004	0.0490326	79664, 51593, 5434, 5435, 5438, 6621, 1025, 23379, 51808, 54973, 6908, 2957, 2958, 26173, 5441, 23248, 65123, 79871, 55197, 80789, 6667, 1022, 2962, 2960, 22916, 904, 79035, 5431, 5430, 58490, 5433, 905, 5432	4171	70	11756	1.32873	1	0.872366	62.779
GOTERM_BP_DIRECT	GO:0060070~canonical Wnt signaling pathway	33	0.699004	0.0490326	3219, 4041, 4040, 9968, 6659, 2932, 5663, 6794, 7474, 1499, 8322, 8324, 4929, 6907, 607, 595, 7855, 5728, 84133, 324, 1855, 7403, 90268, 85458, 7320, 57680, 8312, 4088, 2535, 9314, 6382, 4609, 6934	4171	70	11756	1.32873	1	0.872366	62.779
GOTERM_CC_DIRECT	GO:0001741~XY body	8	0.169456	0.0490673	7320, 23309, 6599, 6598, 329, 3014, 10733, 7319	4343	11	12453	2.08536	1	0.425869	55.4175
KEGG_PATHWAY	hsa00030:Pentose phosphate pathway	14	0.296547	0.0490977	6120, 226, 230, 9563, 55276, 5634, 5211, 5631, 6888, 2539, 5236, 7086, 2821, 5226	1804	23	4809	1.62263	1	0.469943	48.7917
GOTERM_BP_DIRECT	GO:0043923~positive regulation by host of viral transcription	9	0.190638	0.0498343	3725, 64710, 6598, 6597, 2033, 904, 51193, 1105, 6667	4171	13	11756	1.95128	1	0.875152	63.391
GOTERM_BP_DIRECT	GO:0043518~negative regulation of DNA damage response, signal transduction by p53 class mediator	9	0.190638	0.0498343	1859, 754, 4282, 59343, 23028, 4193, 960, 23411, 5716	4171	13	11756	1.95128	1	0.875152	63.391
GOTERM_BP_DIRECT	GO:0007064~mitotic sister chromatid cohesion	9	0.190638	0.0498343	8243, 25836, 9126, 54921, 83903, 113130, 5885, 23063, 23126	4171	13	11756	1.95128	1	0.875152	63.391
GOTERM_BP_DIRECT	GO:0001824~blastocyst development	9	0.190638	0.0498343	824, 5704, 4678, 5702, 663, 1999, 7046, 9412, 1603	4171	13	11756	1.95128	1	0.875152	63.391
GOTERM_BP_DIRECT	GO:0031529~ruffle organization	9	0.190638	0.0498343	7168, 57175, 23647, 59338, 382, 55604, 51474, 5879, 2475	4171	13	11756	1.95128	1	0.875152	63.391
INTERPRO	IPR003960:ATPase, AAA-type, conserved site	15	0.317729	0.049972	63979, 9319, 5706, 5704, 166378, 27183, 7415, 5705, 11104, 29028, 5702, 5701, 5189, 10730, 617	4344	27	12512	1.60016	1	0.968731	62.0323
UP_SEQ_FEATURE	repeat:HEAT 14	7	0.148274	0.0499873	10985, 5518, 23066, 9989, 9670, 23392, 55832	4552	9	13191	2.25388	1	0.991391	64.4435
INTERPRO	IPR002999:Tudor domain	12	0.254183	0.0500395	79868, 9869, 22823, 5252, 8165, 10285, 23424, 51742, 26147, 51230, 9682, 6607	4344	20	12512	1.72818	1	0.9673	62.0833
BIOCARTA	h_rbPathway:RB Tumor Suppressor/Checkpoint Signaling in response to DNA damage	9	0.190638	0.0500832	994, 995, 472, 1017, 7533, 1019, 7465, 7157, 983	520	12	1324	1.90962	1	0.576145	49.382
GOTERM_MF_DIRECT	GO:0008301~DNA binding, bending	9	0.190638	0.050122	2296, 3148, 3149, 3146, 7155, 7019, 8091, 7153, 55809	4211	13	11857	1.94935	1	0.786496	58.9632
UP_KEYWORDS	Alternative initiation	40	0.847278	0.0501549	5917, 51497, 200185, 2768, 10272, 3029, 7799, 1312, 10521, 25946, 80119, 1051, 7422, 4638, 1500, 10922, 80025, 2957, 5728, 7529, 2570, 672, 2908, 64783, 6883, 7428, 7317, 857, 3980, 84876, 6198, 6510, 1981, 4521, 2237, 6670, 10644, 2023, 9054, 5454	4583	90	13285	1.28834	1	0.302459	53.0752
GOTERM_BP_DIRECT	GO:0090263~positive regulation of canonical Wnt signaling pathway	48	1.01673	0.050379	5717, 5718, 64750, 65981, 4040, 1453, 23399, 6659, 1454, 441478, 5710, 9861, 5686, 55182, 5713, 5685, 5683, 5716, 25805, 9491, 84327, 79971, 10197, 139285, 259266, 55737, 5300, 5708, 5709, 5706, 5707, 5691, 5704, 5705, 7316, 81847, 5702, 857, 5695, 7314, 1855, 5701, 6233, 7311, 85458, 5688, 5689, 8312	4171	108	11756	1.25267	1	0.876505	63.8014
GOTERM_BP_DIRECT	GO:0016477~cell migration	62	1.31328	0.0506066	23032, 57175, 3280, 23513, 7126, 4898, 983, 10298, 2296, 2195, 63916, 387, 1289, 55604, 54764, 977, 3202, 5792, 25, 4192, 3716, 27, 8394, 1942, 10092, 6198, 5590, 3915, 84687, 2909, 55704, 3911, 2022, 81610, 967, 2932, 23358, 9578, 25805, 7040, 9672, 5420, 55660, 10736, 8994, 1445, 5728, 694, 64083, 129787, 6624, 221927, 9564, 324, 8476, 23080, 23286, 81873, 6385, 2534, 6382, 7057	4171	144	11756	1.21352	1	0.876175	63.9715
GOTERM_BP_DIRECT	GO:0001701~in utero embryonic development	72	1.5251	0.0509511	154796, 689, 8531, 29123, 8533, 57534, 55845, 118, 2648, 6491, 2296, 7168, 60626, 57178, 130507, 4154, 6926, 5589, 201163, 27173, 9546, 26005, 7403, 28982, 4836, 7779, 26115, 8451, 4088, 23028, 4089, 57498, 29985, 5930, 4609, 25942, 5310, 7516, 2768, 10672, 27086, 25949, 1499, 2697, 9470, 7422, 8894, 103, 102, 7046, 4904, 1845, 3276, 2551, 657, 598, 9997, 4436, 7763, 5727, 53615, 7319, 7320, 5768…	4171	170	11756	1.19372	1	0.87646	64.2277
UP_KEYWORDS	Transcription termination	5	0.10591	0.0511979	8458, 284119, 7270, 22803, 7978	4583	5	13285	2.89876	1	0.304765	53.8272
UP_SEQ_FEATURE	zinc finger region:TRAF-type 2	5	0.10591	0.0512556	7189, 7188, 7187, 7186, 9618	4552	5	13191	2.89785	1	0.991998	65.3886
UP_SEQ_FEATURE	domain:MI	5	0.10591	0.0512556	1982, 1981, 64434, 57703, 8672	4552	5	13191	2.89785	1	0.991998	65.3886
UP_SEQ_FEATURE	zinc finger region:TRAF-type 1	5	0.10591	0.0512556	7189, 7188, 7187, 7186, 9618	4552	5	13191	2.89785	1	0.991998	65.3886
UP_SEQ_FEATURE	domain:YTH	5	0.10591	0.0512556	54915, 253943, 64848, 91746, 51441	4552	5	13191	2.89785	1	0.991998	65.3886
UP_SEQ_FEATURE	domain:AWS	5	0.10591	0.0512556	55870, 29072, 7468, 64324, 54904	4552	5	13191	2.89785	1	0.991998	65.3886
INTERPRO	IPR010994:RuvA domain 2-like	7	0.148274	0.0514514	2067, 6830, 55133, 2072, 3835, 79736, 57697	4344	9	12512	2.24023	1	0.96888	63.1339
GOTERM_BP_DIRECT	GO:0006296~nucleotide-excision repair, DNA incision, 5'-to lesion	19	0.402457	0.0516078	2067, 5424, 2072, 7316, 9557, 404672, 7314, 6233, 7311, 5985, 8451, 6117, 8450, 1643, 5111, 2968, 1642, 142, 2967	4171	36	11756	1.48755	1	0.878343	64.7111
GOTERM_CC_DIRECT	GO:0034399~nuclear periphery	12	0.254183	0.0516371	25909, 26953, 3837, 11168, 7175, 468, 30000, 3843, 9972, 3842, 23165, 10969	4343	20	12453	1.72042	1	0.439609	57.3131
GOTERM_CC_DIRECT	GO:0012507~ER to Golgi transport vesicle membrane	20	0.423639	0.0517401	10972, 6721, 9570, 22872, 966, 3998, 8615, 10959, 10427, 11196, 51128, 3107, 6720, 9632, 10175, 567, 3134, 3133, 3105, 10802	4343	39	12453	1.47045	1	0.437171	57.3875
SMART	SM00213:UBQ	18	0.381275	0.0521933	29978, 4738, 10291, 8638, 7316, 84901, 7314, 6233, 7311, 64224, 2197, 5887, 6612, 29128, 5886, 6613, 56061, 8266	2429	34	6919	1.50803	1	0.797943	55.5514
UP_KEYWORDS	Nucleotide biosynthesis	6	0.127092	0.052238	5631, 1841, 7298, 5635, 5634, 5636	4583	7	13285	2.48465	1	0.307001	54.5659
UP_SEQ_FEATURE	zinc finger region:C2H2-type 6; atypical	6	0.127092	0.0523064	57473, 11108, 23394, 4150, 49854, 51427	4552	7	13191	2.48387	1	0.992395	66.1534
UP_SEQ_FEATURE	domain:W2	6	0.127092	0.0523064	1982, 1983, 1981, 9689, 8672, 28969	4552	7	13191	2.48387	1	0.992395	66.1534
UP_SEQ_FEATURE	short sequence motif:Nuclear localization signal 1	6	0.127092	0.0523064	5511, 64326, 10914, 23210, 22794, 171023	4552	7	13191	2.48387	1	0.992395	66.1534
UP_SEQ_FEATURE	short sequence motif:Nuclear localization signal 2	6	0.127092	0.0523064	5511, 64326, 10914, 23210, 22794, 171023	4552	7	13191	2.48387	1	0.992395	66.1534
INTERPRO	IPR003889:FY-rich, C-terminal	5	0.10591	0.0523911	58508, 84897, 9757, 4297, 8085	4344	5	12512	2.88029	1	0.969374	63.8177
INTERPRO	IPR017956:AT hook, DNA-binding motif	5	0.10591	0.0523911	11176, 55870, 10847, 8091, 3159	4344	5	12512	2.88029	1	0.969374	63.8177
INTERPRO	IPR019479:Peroxiredoxin, C-terminal	5	0.10591	0.0523911	9588, 10935, 7001, 10549, 5052	4344	5	12512	2.88029	1	0.969374	63.8177
INTERPRO	IPR010448:Torsin	5	0.10591	0.0523911	64222, 27433, 1861, 27348, 54863	4344	5	12512	2.88029	1	0.969374	63.8177
INTERPRO	IPR012921:Spen paralogue and orthologue SPOC, C-terminal	5	0.10591	0.0523911	23013, 23469, 64783, 29890, 11083	4344	5	12512	2.88029	1	0.969374	63.8177
INTERPRO	IPR002483:PWI domain	5	0.10591	0.0523911	54439, 9129, 58517, 10250, 64062	4344	5	12512	2.88029	1	0.969374	63.8177
INTERPRO	IPR000866:Alkyl hydroperoxide reductase subunit C/ Thiol specific antioxidant	5	0.10591	0.0523911	9588, 10935, 7001, 10549, 5052	4344	5	12512	2.88029	1	0.969374	63.8177
INTERPRO	IPR016194:SPOC like C-terminal domain	5	0.10591	0.0523911	23013, 64783, 7520, 2547, 29890	4344	5	12512	2.88029	1	0.969374	63.8177
INTERPRO	IPR006560:AWS	5	0.10591	0.0523911	55870, 29072, 7468, 64324, 54904	4344	5	12512	2.88029	1	0.969374	63.8177
INTERPRO	IPR007275:YTH domain	5	0.10591	0.0523911	54915, 253943, 64848, 91746, 51441	4344	5	12512	2.88029	1	0.969374	63.8177
INTERPRO	IPR003888:FY-rich, N-terminal	5	0.10591	0.0523911	58508, 84897, 9757, 4297, 8085	4344	5	12512	2.88029	1	0.969374	63.8177
GOTERM_MF_DIRECT	GO:0008139~nuclear localization sequence binding	13	0.275365	0.0525368	8021, 26953, 3837, 3836, 3839, 3838, 9818, 9972, 9670, 30000, 3843, 3842, 23633	4211	22	11857	1.66383	1	0.797705	60.7333
GOTERM_CC_DIRECT	GO:0048188~Set1C/COMPASS complex	7	0.148274	0.0525646	30827, 80335, 23067, 5929, 9739, 3054, 11091	4343	9	12453	2.23018	1	0.439362	57.9785
GOTERM_CC_DIRECT	GO:0042555~MCM complex	7	0.148274	0.0525646	4173, 4172, 4175, 4174, 253714, 4176, 4171	4343	9	12453	2.23018	1	0.439362	57.9785
GOTERM_CC_DIRECT	GO:0005677~chromatin silencing complex	7	0.148274	0.0525646	8467, 11176, 6839, 57597, 84629, 22933, 23411	4343	9	12453	2.23018	1	0.439362	57.9785
GOTERM_CC_DIRECT	GO:0044666~MLL3/4 complex	7	0.148274	0.0525646	22976, 58508, 5929, 79447, 7403, 11091, 8085	4343	9	12453	2.23018	1	0.439362	57.9785
UP_SEQ_FEATURE	zinc finger region:C4-type	29	0.614277	0.0528431	4302, 5438, 6827, 6168, 6167, 5422, 84172, 6117, 8894, 116988, 5424, 116987, 5426, 55738, 7156, 8028, 5980, 7316, 7314, 6233, 4171, 7311, 2960, 5976, 5431, 7862, 50807, 2967, 3267	4552	62	13191	1.35544	1	0.992403	66.5379
UP_SEQ_FEATURE	domain:UBA	19	0.402457	0.0528786	29978, 90957, 23387, 4139, 26524, 868, 9898, 23358, 10075, 23197, 9113, 55187, 6248, 57690, 150094, 2011, 4666, 4140, 54861	4552	37	13191	1.48808	1	0.992046	66.5631
GOTERM_BP_DIRECT	GO:0000281~mitotic cytokinesis	16	0.338911	0.0531136	51203, 6711, 128866, 324, 257364, 24137, 26586, 54443, 5921, 55165, 3925, 5347, 9493, 4628, 10112, 6651	4171	29	11756	1.55504	1	0.884349	65.7964
GOTERM_BP_DIRECT	GO:0051297~centrosome organization	16	0.338911	0.0531136	117178, 5108, 8409, 79441, 7516, 55755, 1107, 663, 23354, 5347, 153241, 4659, 6566, 402, 9793, 54801	4171	29	11756	1.55504	1	0.884349	65.7964
GOTERM_CC_DIRECT	GO:0043292~contractile fiber	5	0.10591	0.0532496	2697, 8851, 7913, 4659, 1471	4343	5	12453	2.86737	1	0.440634	58.4637
GOTERM_MF_DIRECT	GO:0019888~protein phosphatase regulator activity	16	0.338911	0.0535598	23141, 23645, 55844, 3476, 8036, 5520, 5525, 5529, 5528, 5527, 5518, 6418, 10776, 9989, 2029, 151987	4211	29	11857	1.5535	1	0.79965	61.4612
INTERPRO	IPR011332:Ribosomal protein, zinc-binding domain	6	0.127092	0.0536549	6168, 64983, 6167, 6233, 7311, 9553	4344	7	12512	2.46882	1	0.970502	64.7185
INTERPRO	IPR010666:Zinc finger, GRF-type	6	0.127092	0.0536549	8458, 55247, 7156, 112479, 55345, 27301	4344	7	12512	2.46882	1	0.970502	64.7185
INTERPRO	IPR003307:W2 domain	6	0.127092	0.0536549	1982, 1983, 1981, 9689, 8672, 28969	4344	7	12512	2.46882	1	0.970502	64.7185
INTERPRO	IPR006903:RNA polymerase II-binding domain	6	0.127092	0.0536549	23248, 51585, 22828, 58490, 55197, 10523	4344	7	12512	2.46882	1	0.970502	64.7185
GOTERM_BP_DIRECT	GO:0051292~nuclear pore complex assembly	8	0.169456	0.0537249	25909, 57142, 7175, 124491, 9972, 23165, 55706, 55161	4171	11	11756	2.04982	1	0.88584	66.2278
GOTERM_BP_DIRECT	GO:0048026~positive regulation of mRNA splicing, via spliceosome	8	0.169456	0.0537249	9967, 27316, 27339, 26528, 9775, 6625, 10262, 3312	4171	11	11756	2.04982	1	0.88584	66.2278
GOTERM_BP_DIRECT	GO:0006098~pentose-phosphate shunt	8	0.169456	0.0537249	6120, 6888, 2539, 7167, 7086, 9563, 55276, 5226	4171	11	11756	2.04982	1	0.88584	66.2278
GOTERM_BP_DIRECT	GO:0048024~regulation of mRNA splicing, via spliceosome	8	0.169456	0.0537249	6732, 6733, 23210, 57703, 6428, 91746, 10657, 6651	4171	11	11756	2.04982	1	0.88584	66.2278
GOTERM_BP_DIRECT	GO:1990440~positive regulation of transcription from RNA polymerase II promoter in response to endoplasmic reticulum stress	8	0.169456	0.0537249	7494, 1051, 1388, 468, 1649, 22926, 3309, 7157	4171	11	11756	2.04982	1	0.88584	66.2278
GOTERM_BP_DIRECT	GO:1903364~positive regulation of cellular protein catabolic process	8	0.169456	0.0537249	55737, 754, 7430, 4478, 26234, 55823, 139285, 5962	4171	11	11756	2.04982	1	0.88584	66.2278
GOTERM_BP_DIRECT	GO:1900153~positive regulation of nuclear-transcribed mRNA catabolic process, deadenylation-dependent decay	8	0.169456	0.0537249	678, 677, 10140, 23019, 57690, 29883, 23112, 26986	4171	11	11756	2.04982	1	0.88584	66.2278
COG_ONTOLOGY	Intracellular trafficking and secretion	21	0.444821	0.0540578	26953, 3837, 3839, 65082, 54892, 3838, 30000, 3843, 8943, 57521, 3842, 23633, 22820, 10427, 10652, 25852, 55187, 9632, 23230, 26984, 10802	580	41	1628	1.43768	0.93433	0.93433	41.3064
UP_SEQ_FEATURE	repeat:ARM 6	11	0.233001	0.0542682	25852, 3836, 1500, 3839, 3838, 324, 8502, 23633, 79798, 1499, 8615	4552	18	13191	1.77091	1	0.992665	67.5386
SMART	SM00384:AT_hook	5	0.10591	0.054471	11176, 55870, 10847, 8091, 3159	2429	5	6919	2.8485	1	0.798939	57.14
SMART	SM00542:FYRC	5	0.10591	0.054471	58508, 84897, 9757, 4297, 8085	2429	5	6919	2.8485	1	0.798939	57.14
SMART	SM00541:FYRN	5	0.10591	0.054471	58508, 84897, 9757, 4297, 8085	2429	5	6919	2.8485	1	0.798939	57.14
SMART	SM00570:AWS	5	0.10591	0.054471	55870, 29072, 7468, 64324, 54904	2429	5	6919	2.8485	1	0.798939	57.14
GOTERM_CC_DIRECT	GO:0016281~eukaryotic translation initiation factor 4F complex	6	0.127092	0.0546773	1982, 1981, 1974, 1975, 7458, 8672	4343	7	12453	2.45775	1	0.446473	59.4581
GOTERM_CC_DIRECT	GO:0071541~eukaryotic translation initiation factor 3 complex, eIF3m	6	0.127092	0.0546773	8668, 8662, 8661, 8667, 10480, 8664	4343	7	12453	2.45775	1	0.446473	59.4581
GOTERM_CC_DIRECT	GO:0072357~PTW/PP1 phosphatase complex	6	0.127092	0.0546773	5514, 80335, 5501, 5499, 5500, 4659	4343	7	12453	2.45775	1	0.446473	59.4581
GOTERM_CC_DIRECT	GO:0001939~female pronucleus	6	0.127092	0.0546773	200424, 6908, 10951, 10270, 55183, 6513	4343	7	12453	2.45775	1	0.446473	59.4581
GOTERM_CC_DIRECT	GO:0005751~mitochondrial respiratory chain complex IV	6	0.127092	0.0546773	1351, 9377, 1350, 4697, 1327, 1337	4343	7	12453	2.45775	1	0.446473	59.4581
INTERPRO	IPR000608:Ubiquitin-conjugating enzyme, E2	19	0.402457	0.0559156	11065, 7327, 7326, 55585, 7319, 7320, 997, 7321, 54926, 7332, 7324, 7322, 7336, 63893, 7323, 29089, 57448, 9040, 51465	4344	37	12512	1.47907	1	0.973392	66.2772
SMART	SM00582:RPR	6	0.127092	0.056129	23350, 23248, 51585, 22828, 58490, 55197	2429	7	6919	2.44157	1	0.796233	58.2628
SMART	SM00515:eIF5C	6	0.127092	0.056129	1982, 1983, 1981, 9689, 8672, 28969	2429	7	6919	2.44157	1	0.796233	58.2628
INTERPRO	IPR006073:GTP binding domain	11	0.233001	0.0564455	23560, 29889, 54552, 26164, 84273, 29083, 55665, 26354, 4733, 26284, 92170	4344	18	12512	1.76018	1	0.973032	66.633
INTERPRO	IPR000795:Elongation factor, GTP-binding domain	11	0.233001	0.0564455	10767, 9343, 1938, 7284, 2935, 1968, 85476, 79631, 1915, 9669, 9567	4344	18	12512	1.76018	1	0.973032	66.633
INTERPRO	IPR023313:Ubiquitin-conjugating enzyme, active site	14	0.296547	0.0565888	11065, 7327, 7326, 7319, 7320, 7321, 997, 54926, 7332, 7324, 7322, 7323, 29089, 9040	4344	25	12512	1.61297	1	0.971982	66.7286
INTERPRO	IPR008942:ENTH/VHS	14	0.296547	0.0565888	23248, 51585, 146691, 22828, 55197, 8027, 23163, 10523, 8301, 22905, 9685, 23350, 58490, 23062	4344	25	12512	1.61297	1	0.971982	66.7286
GOTERM_BP_DIRECT	GO:0031536~positive regulation of exit from mitosis	5	0.10591	0.0566541	7040, 11065, 113130, 332, 11331	4171	5	11756	2.81851	1	0.897603	68.2246
GOTERM_BP_DIRECT	GO:0070934~CRD-mediated mRNA stabilization	5	0.10591	0.0566541	10642, 3192, 10492, 1660, 4904	4171	5	11756	2.81851	1	0.897603	68.2246
GOTERM_BP_DIRECT	GO:1904885~beta-catenin destruction complex assembly	5	0.10591	0.0566541	1452, 8312, 2932, 139285, 324	4171	5	11756	2.81851	1	0.897603	68.2246
GOTERM_BP_DIRECT	GO:0046939~nucleotide phosphorylation	5	0.10591	0.0566541	11284, 1841, 204, 10111, 2987	4171	5	11756	2.81851	1	0.897603	68.2246
GOTERM_BP_DIRECT	GO:0075525~viral translational termination-reinitiation	5	0.10591	0.0566541	51386, 8662, 8661, 8666, 8664	4171	5	11756	2.81851	1	0.897603	68.2246
GOTERM_BP_DIRECT	GO:0030261~chromosome condensation	5	0.10591	0.0566541	29781, 54892, 8091, 9131, 983	4171	5	11756	2.81851	1	0.897603	68.2246
GOTERM_BP_DIRECT	GO:0060136~embryonic process involved in female pregnancy	5	0.10591	0.0566541	10370, 6670, 3297, 2182, 3726	4171	5	11756	2.81851	1	0.897603	68.2246
GOTERM_BP_DIRECT	GO:0000056~ribosomal small subunit export from nucleus	5	0.10591	0.0566541	4927, 84946, 7514, 6209, 5901	4171	5	11756	2.81851	1	0.897603	68.2246
GOTERM_BP_DIRECT	GO:0021762~substantia nigra development	23	0.487185	0.056714	10971, 9919, 805, 64770, 7707, 801, 22933, 80264, 3309, 8655, 10409, 522, 64426, 7345, 2539, 3939, 387, 808, 7533, 1152, 7531, 60, 515	4171	46	11756	1.40925	1	0.896524	68.2642
GOTERM_MF_DIRECT	GO:0051575~5'-deoxyribose-5-phosphate lyase activity	5	0.10591	0.0568574	10721, 7520, 2547, 8091, 3159	4211	5	11857	2.81572	1	0.814838	63.7222
GOTERM_MF_DIRECT	GO:1990226~histone methyltransferase binding	5	0.10591	0.0568574	11108, 10528, 10951, 3326, 11335	4211	5	11857	2.81572	1	0.814838	63.7222
GOTERM_MF_DIRECT	GO:0045505~dynein intermediate chain binding	5	0.10591	0.0568574	5048, 83658, 54919, 8655, 3064	4211	5	11857	2.81572	1	0.814838	63.7222
GOTERM_MF_DIRECT	GO:0001221~transcription cofactor binding	5	0.10591	0.0568574	84181, 2309, 7975, 9314, 4780	4211	5	11857	2.81572	1	0.814838	63.7222
GOTERM_MF_DIRECT	GO:0045182~translation regulator activity	5	0.10591	0.0568574	6203, 10643, 10644, 10642, 6208	4211	5	11857	2.81572	1	0.814838	63.7222
GOTERM_BP_DIRECT	GO:0031053~primary miRNA processing	7	0.148274	0.0570227	51593, 54487, 4088, 29102, 56339, 3181, 4086	4171	9	11756	2.19217	1	0.896507	68.4677
GOTERM_BP_DIRECT	GO:0071481~cellular response to X-ray	7	0.148274	0.0570227	25836, 64710, 472, 7520, 2547, 1785, 7158	4171	9	11756	2.19217	1	0.896507	68.4677
GOTERM_BP_DIRECT	GO:0047497~mitochondrion transport along microtubule	7	0.148274	0.0570227	8409, 10128, 55201, 23095, 7314, 4131, 89941	4171	9	11756	2.19217	1	0.896507	68.4677
GOTERM_BP_DIRECT	GO:0034501~protein localization to kinetochore	7	0.148274	0.0570227	57082, 9212, 283489, 7272, 54908, 983, 79003	4171	9	11756	2.19217	1	0.896507	68.4677
GOTERM_BP_DIRECT	GO:0060766~negative regulation of androgen receptor signaling pathway	7	0.148274	0.0570227	1601, 6597, 5245, 3065, 27086, 23411, 9063	4171	9	11756	2.19217	1	0.896507	68.4677
GOTERM_BP_DIRECT	GO:0035308~negative regulation of protein dephosphorylation	7	0.148274	0.0570227	5511, 7529, 23645, 3476, 10776, 7531, 2029	4171	9	11756	2.19217	1	0.896507	68.4677
GOTERM_BP_DIRECT	GO:0006613~cotranslational protein targeting to membrane	7	0.148274	0.0570227	9697, 23204, 6727, 6728, 7095, 6746, 6745	4171	9	11756	2.19217	1	0.896507	68.4677
GOTERM_BP_DIRECT	GO:0016070~RNA metabolic process	7	0.148274	0.0570227	9991, 7247, 57062, 22794, 22803, 79039, 8446	4171	9	11756	2.19217	1	0.896507	68.4677
GOTERM_BP_DIRECT	GO:0045899~positive regulation of RNA polymerase II transcriptional preinitiation complex assembly	7	0.148274	0.0570227	5706, 5704, 5705, 5702, 1385, 5701, 55832	4171	9	11756	2.19217	1	0.896507	68.4677
GOTERM_BP_DIRECT	GO:1904851~positive regulation of establishment of protein localization to telomere	7	0.148274	0.0570227	10575, 10576, 908, 10574, 1736, 6950, 22948	4171	9	11756	2.19217	1	0.896507	68.4677
GOTERM_MF_DIRECT	GO:0030957~Tat protein binding	7	0.148274	0.0572913	3301, 6598, 6597, 4869, 60, 23710, 22954	4211	9	11857	2.19001	1	0.813087	64.0101
GOTERM_MF_DIRECT	GO:0017069~snRNA binding	7	0.148274	0.0572913	6626, 6629, 22916, 10614, 11066, 1025, 25929	4211	9	11857	2.19001	1	0.813087	64.0101
GOTERM_BP_DIRECT	GO:0032543~mitochondrial translation	18	0.381275	0.0576802	283459, 78988, 51021, 84273, 65993, 51116, 130916, 51081, 54460, 55168, 57129, 124995, 54948, 23395, 51258, 64960, 118487, 55037	4171	34	11756	1.49215	1	0.897951	68.8971
GOTERM_BP_DIRECT	GO:0045184~establishment of protein localization	18	0.381275	0.0576802	55920, 22873, 3837, 59338, 2316, 7415, 4193, 5911, 25, 9928, 90102, 55165, 3987, 25861, 5347, 9798, 5962, 23603	4171	34	11756	1.49215	1	0.897951	68.8971
GOTERM_CC_DIRECT	GO:0005665~DNA-directed RNA polymerase II, core complex	11	0.233001	0.0581139	5434, 79724, 5435, 84181, 8725, 5438, 5431, 5430, 5433, 5432, 5441	4343	18	12453	1.75228	1	0.46419	61.7609
GOTERM_BP_DIRECT	GO:0007281~germ cell development	12	0.254183	0.058159	22873, 6198, 7073, 598, 581, 4090, 4436, 5048, 207, 10658, 10522, 2475	4171	20	11756	1.69111	1	0.898629	69.2064
GOTERM_BP_DIRECT	GO:0043984~histone H4-K16 acetylation	12	0.254183	0.058159	55167, 55683, 8473, 79960, 339287, 284058, 151050, 23338, 51230, 4297, 3054, 11091	4171	20	11756	1.69111	1	0.898629	69.2064
GOTERM_BP_DIRECT	GO:1900087~positive regulation of G1/S transition of mitotic cell cycle	12	0.254183	0.058159	26057, 1981, 328, 301, 1654, 84967, 8451, 8450, 8318, 5962, 57521, 56257	4171	20	11756	1.69111	1	0.898629	69.2064
GOTERM_BP_DIRECT	GO:0033574~response to testosterone	12	0.254183	0.058159	811, 1843, 790, 4507, 6198, 4830, 4678, 1019, 10481, 7057, 3297, 2821	4171	20	11756	1.69111	1	0.898629	69.2064
GOTERM_BP_DIRECT	GO:0006293~nucleotide-excision repair, preincision complex stabilization	12	0.254183	0.058159	2067, 8451, 2072, 6117, 8450, 1643, 9557, 404672, 142, 2968, 1642, 2967	4171	20	11756	1.69111	1	0.898629	69.2064
GOTERM_BP_DIRECT	GO:0043086~negative regulation of catalytic activity	25	0.529549	0.0581685	81611, 22853, 4179, 304, 10236, 9546, 5635, 308, 5636, 9749, 23640, 5511, 51070, 5514, 23197, 26472, 6418, 4659, 84687, 4946, 7076, 6050, 10776, 2029, 55832	4171	51	11756	1.38162	1	0.897371	69.2125
GOTERM_MF_DIRECT	GO:0001104~RNA polymerase II transcription cofactor activity	18	0.381275	0.0581946	9967, 9443, 9969, 9441, 9968, 23389, 6837, 55809, 9412, 7158, 5469, 10001, 84246, 219541, 54797, 400569, 23082, 10432	4211	34	11857	1.49068	1	0.813988	64.6029
GOTERM_CC_DIRECT	GO:0005791~rough endoplasmic reticulum	19	0.402457	0.0582725	6780, 6184, 121665, 5663, 2752, 6185, 821, 351, 3329, 79147, 9697, 51430, 7095, 27346, 29098, 57003, 29927, 4924, 81502	4343	37	12453	1.47243	1	0.462078	61.8642
GOTERM_MF_DIRECT	GO:0030515~snoRNA binding	12	0.254183	0.0585587	51602, 55127, 10885, 5822, 4521, 10528, 55272, 11164, 9188, 92856, 131870, 8602	4211	20	11857	1.68943	1	0.811904	64.8392
GOTERM_BP_DIRECT	GO:0016584~nucleosome positioning	6	0.127092	0.0587517	8467, 54623, 10664, 3006, 51773, 3008	4171	7	11756	2.41586	1	0.898475	69.5851
GOTERM_BP_DIRECT	GO:0033598~mammary gland epithelial cell proliferation	6	0.127092	0.0587517	595, 1051, 8945, 3398, 6778, 5594	4171	7	11756	2.41586	1	0.898475	69.5851
GOTERM_BP_DIRECT	GO:0075713~establishment of integrated proviral latency	6	0.127092	0.0587517	8815, 11168, 7520, 2547, 5478, 3159	4171	7	11756	2.41586	1	0.898475	69.5851
GOTERM_BP_DIRECT	GO:1901838~positive regulation of transcription of nuclear large rRNA transcript from RNA polymerase I promoter	6	0.127092	0.0587517	1663, 6598, 6597, 25926, 4691, 2475	4171	7	11756	2.41586	1	0.898475	69.5851
GOTERM_BP_DIRECT	GO:0051683~establishment of Golgi localization	6	0.127092	0.0587517	11235, 9368, 10494, 7534, 57584, 22820	4171	7	11756	2.41586	1	0.898475	69.5851
GOTERM_BP_DIRECT	GO:0031062~positive regulation of histone methylation	6	0.127092	0.0587517	54623, 7494, 80312, 94104, 56254, 26097	4171	7	11756	2.41586	1	0.898475	69.5851
GOTERM_BP_DIRECT	GO:0033673~negative regulation of kinase activity	6	0.127092	0.0587517	84962, 1445, 10935, 10641, 1027, 8660	4171	7	11756	2.41586	1	0.898475	69.5851
GOTERM_BP_DIRECT	GO:0006333~chromatin assembly or disassembly	6	0.127092	0.0587517	55723, 79723, 8479, 9219, 1107, 9031	4171	7	11756	2.41586	1	0.898475	69.5851
GOTERM_BP_DIRECT	GO:2000781~positive regulation of double-strand break repair	6	0.127092	0.0587517	1663, 8914, 2305, 84250, 131870, 55719	4171	7	11756	2.41586	1	0.898475	69.5851
GOTERM_BP_DIRECT	GO:0046620~regulation of organ growth	6	0.127092	0.0587517	2296, 28982, 6647, 9113, 26524, 2303	4171	7	11756	2.41586	1	0.898475	69.5851
GOTERM_BP_DIRECT	GO:0075522~IRES-dependent viral translational initiation	6	0.127092	0.0587517	8662, 8661, 5094, 6741, 5725, 8664	4171	7	11756	2.41586	1	0.898475	69.5851
GOTERM_BP_DIRECT	GO:0007625~grooming behavior	6	0.127092	0.0587517	353, 3218, 3251, 26050, 5538, 1497	4171	7	11756	2.41586	1	0.898475	69.5851
GOTERM_BP_DIRECT	GO:1903827~regulation of cellular protein localization	6	0.127092	0.0587517	1454, 10228, 23028, 1855, 7474, 142	4171	7	11756	2.41586	1	0.898475	69.5851
KEGG_PATHWAY	hsa05034:Alcoholism	49	1.03792	0.0588834	8969, 805, 8338, 5894, 6464, 136, 2354, 801, 9555, 2787, 2783, 2771, 1388, 92815, 369, 10488, 55970, 94239, 8364, 8520, 8367, 51564, 126961, 1385, 2778, 2773, 3014, 3015, 3017, 3021, 2782, 2885, 468, 5501, 5499, 5500, 3065, 3066, 8336, 808, 85236, 84254, 10645, 8334, 8358, 6654, 8356, 5594, 8330	1804	106	4809	1.23228	1	0.519686	55.3709
KEGG_PATHWAY	hsa04152:AMPK signaling pathway	49	1.03792	0.0588834	55437, 10890, 1938, 7249, 55844, 2475, 3480, 6319, 2194, 10488, 92579, 3156, 1978, 79602, 4218, 6885, 1385, 51094, 57521, 207, 208, 6198, 7248, 31, 23411, 6794, 5520, 5211, 5565, 5209, 5515, 5518, 1994, 595, 5862, 2308, 2309, 8660, 5525, 5529, 5528, 5527, 3667, 6720, 84254, 10645, 8471, 5295, 5296	1804	106	4809	1.23228	1	0.519686	55.3709
GOTERM_BP_DIRECT	GO:0006513~protein monoubiquitination	15	0.317729	0.0594331	7320, 10075, 54926, 84861, 55658, 8454, 10277, 23295, 63893, 7323, 6737, 9148, 29089, 10210, 51514	4171	27	11756	1.56584	1	0.899951	70.015
GOTERM_MF_DIRECT	GO:0019903~protein phosphatase binding	29	0.614277	0.0603108	1956, 3783, 7415, 10399, 8036, 1027, 1499, 2648, 7187, 7186, 3320, 4233, 7184, 4217, 1445, 5609, 8660, 3716, 7157, 996, 55291, 2885, 8826, 8724, 51434, 51433, 6778, 5295, 5296	4211	61	11857	1.33862	1	0.817371	65.9556
UP_SEQ_FEATURE	compositionally biased region:Ala-rich	51	1.08028	0.0605191	79586, 221937, 9698, 63893, 57178, 195828, 10155, 130507, 57492, 51236, 23215, 121260, 54890, 55122, 51663, 643314, 57215, 80829, 3184, 84858, 23028, 5936, 10432, 23411, 10048, 23636, 58489, 5457, 10522, 6894, 55252, 51341, 51804, 4094, 23524, 64763, 23592, 220213, 55776, 22827, 55147, 2926, 55573, 2778, 23186, 126298, 6670, 54581, 10250, 8471, 85416	4552	120	13191	1.23159	1	0.995681	71.6017
UP_KEYWORDS	RNA-mediated gene silencing	20	0.423639	0.0607737	79753, 57472, 51593, 29102, 90459, 6895, 84962, 23318, 23019, 22916, 55571, 57690, 27327, 23405, 5936, 103, 29883, 23112, 9337, 8994	4583	40	13285	1.44938	1	0.345302	60.2252
KEGG_PATHWAY	hsa05100:Bacterial invasion of epithelial cells	34	0.720186	0.0612239	6464, 7414, 868, 2335, 4735, 1785, 23176, 1499, 63916, 387, 60, 5829, 4233, 10801, 2017, 10163, 391, 9564, 8936, 857, 55752, 1398, 10092, 10552, 1399, 1211, 81873, 1213, 10094, 71, 5879, 5295, 1495, 5296	1804	70	4809	1.29479	1	0.519471	56.8241
UP_SEQ_FEATURE	site:Not acetylated	10	0.21182	0.0614381	9123, 54187, 9908, 6726, 6223, 2597, 6217, 8539, 10146, 5634	4552	16	13191	1.81115	1	0.995814	72.1567
UP_SEQ_FEATURE	repeat:ARM 4	13	0.275365	0.0614787	3836, 3839, 3838, 324, 93436, 23633, 23640, 8615, 1499, 25852, 1500, 8502, 79798	4552	23	13191	1.63791	1	0.995601	72.1809
UP_SEQ_FEATURE	zinc finger region:CCHC-type	13	0.275365	0.0614787	6432, 7536, 23089, 54877, 10898, 23174, 55596, 22803, 5936, 10569, 10432, 5930, 85437	4552	23	13191	1.63791	1	0.995601	72.1809
GOTERM_BP_DIRECT	GO:0000910~cytokinesis	22	0.466003	0.0631723	1894, 3619, 675, 598, 23503, 332, 84445, 63971, 55958, 11021, 10899, 9700, 25909, 388, 4627, 5347, 9493, 9798, 10112, 9055, 10783, 9475	4171	44	11756	1.40925	1	0.912696	72.2733
GOTERM_BP_DIRECT	GO:0007077~mitotic nuclear envelope disassembly	22	0.466003	0.0631723	8021, 23636, 23225, 23511, 23399, 9818, 8086, 23279, 23165, 983, 5903, 4927, 8815, 7175, 348995, 5347, 11097, 891, 9972, 10783, 10762, 55706	4171	44	11756	1.40925	1	0.912696	72.2733
SMART	SM00356:ZnF_C3H1	21	0.444821	0.0633218	678, 677, 90957, 10150, 55854, 80742, 23211, 64062, 10898, 9877, 124245, 255967, 7307, 23264, 5514, 23091, 9931, 79882, 11097, 85451, 4154	2429	42	6919	1.42425	1	0.823551	62.8234
GOTERM_BP_DIRECT	GO:0045814~negative regulation of gene expression, epigenetic	17	0.360093	0.0645405	22823, 5252, 126961, 3720, 58487, 5928, 9555, 1786, 3021, 80314, 5987, 8364, 26147, 8367, 8358, 5931, 8356	4171	32	11756	1.49733	1	0.916208	73.0586
GOTERM_BP_DIRECT	GO:0030163~protein catabolic process	17	0.360093	0.0645405	2055, 5706, 5704, 8945, 5705, 5702, 5538, 207, 5701, 2475, 1203, 8805, 7186, 54982, 25825, 64219, 1509	4171	32	11756	1.49733	1	0.916208	73.0586
GOTERM_BP_DIRECT	GO:0006361~transcription initiation from RNA polymerase I promoter	17	0.360093	0.0645405	5434, 5435, 79101, 404672, 51082, 284119, 64425, 1022, 7343, 25885, 6908, 84172, 7270, 9013, 2968, 5441, 2967	4171	32	11756	1.49733	1	0.916208	73.0586
GOTERM_BP_DIRECT	GO:0010827~regulation of glucose transport	17	0.360093	0.0645405	8021, 23636, 23225, 23511, 9818, 8086, 23279, 23165, 5903, 4927, 7175, 348995, 11097, 9972, 10762, 55706, 57761	4171	32	11756	1.49733	1	0.916208	73.0586
GOTERM_CC_DIRECT	GO:0005682~U5 snRNP	10	0.21182	0.065434	23020, 6628, 6637, 6633, 6634, 10594, 6632, 9416, 10907, 8559	4343	16	12453	1.79211	1	0.499717	66.2634
GOTERM_BP_DIRECT	GO:0007623~circadian rhythm	26	0.550731	0.0655393	1859, 3725, 9967, 50865, 9611, 4841, 1956, 2033, 10236, 7150, 2932, 7298, 5187, 1019, 1385, 56339, 5054, 8204, 1960, 355, 7071, 8914, 6720, 3399, 4783, 23064	4171	54	11756	1.35706	1	0.918366	73.6185
UP_KEYWORDS	Nonsense-mediated mRNA decay	15	0.317729	0.0655521	9939, 26019, 2935, 22794, 84305, 55181, 23293, 9775, 22916, 5976, 55629, 23049, 2107, 26986, 23381	4583	28	13285	1.55291	1	0.364139	63.0991
KEGG_PATHWAY	hsa03460:Fanconi anemia pathway	25	0.529549	0.0656097	55215, 2067, 5429, 675, 3280, 672, 84126, 2072, 7156, 5980, 79728, 57697, 641, 51455, 57599, 80010, 146956, 6117, 29089, 2175, 2177, 83990, 116028, 201254, 7398	1804	49	4809	1.36007	1	0.530887	59.4299
GOTERM_CC_DIRECT	GO:0005758~mitochondrial intermembrane space	30	0.635459	0.0656143	4702, 51499, 6821, 10367, 27166, 1841, 30968, 80025, 6472, 10131, 388753, 57019, 204, 6647, 64083, 4713, 23568, 4725, 400916, 11315, 1678, 4833, 54205, 65260, 10456, 402, 26520, 26235, 9131, 51142	4343	65	12453	1.3234	1	0.497598	66.3677
GOTERM_BP_DIRECT	GO:0045070~positive regulation of viral genome replication	14	0.296547	0.066592	6780, 6732, 6733, 23367, 7153, 5478, 6895, 1654, 5586, 104, 5886, 103, 1642, 26986	4171	25	11756	1.57836	1	0.920617	74.1966
GOTERM_BP_DIRECT	GO:0043484~regulation of RNA splicing	14	0.296547	0.066592	1198, 10150, 6625, 284695, 51755, 55544, 3187, 10922, 3185, 79026, 80004, 6651, 4154, 10658	4171	25	11756	1.57836	1	0.920617	74.1966
GOTERM_BP_DIRECT	GO:0033209~tumor necrosis factor-mediated signaling pathway	43	0.910824	0.0667175	5717, 5718, 9530, 5710, 3875, 330, 9861, 5686, 5713, 5685, 5683, 5716, 9491, 7187, 7186, 8795, 8737, 10197, 4055, 29965, 128178, 5708, 5709, 2309, 5706, 329, 5707, 5691, 5704, 5705, 7316, 5702, 5695, 7314, 5701, 6233, 3856, 7311, 7132, 27242, 5688, 355, 5689	4171	97	11756	1.24944	1	0.919929	74.2647
GOTERM_MF_DIRECT	GO:0051721~protein phosphatase 2A binding	14	0.296547	0.0670867	84930, 2308, 55917, 23141, 3476, 207, 7157, 5520, 6198, 3156, 1978, 10776, 2029, 23381	4211	25	11857	1.5768	1	0.846504	69.9665
UP_KEYWORDS	ADP-ribosylation	25	0.529549	0.0672539	9967, 1487, 391, 7528, 3837, 4869, 22794, 2932, 2767, 2778, 2773, 11198, 2771, 85456, 8148, 4926, 388, 387, 1059, 8312, 2597, 9184, 4088, 5879, 142	4583	53	13285	1.36734	1	0.368505	64.0751
GOTERM_BP_DIRECT	GO:0033683~nucleotide-excision repair, DNA incision	19	0.402457	0.0680642	2067, 5424, 2072, 7316, 9557, 404672, 7314, 6233, 7311, 5985, 8451, 6117, 8450, 1643, 5111, 2968, 1642, 142, 2967	4171	37	11756	1.44734	1	0.922999	74.985
INTERPRO	IPR000210:BTB/POZ-like	60	1.27092	0.0681064	7597, 55709, 10206, 23510, 53339, 571, 9923, 7126, 9925, 89890, 23276, 200845, 80311, 22903, 84861, 29068, 79047, 54813, 7541, 51133, 8216, 57621, 23221, 8405, 57563, 55892, 55958, 112939, 92999, 10472, 55295, 7690, 222658, 10009, 79798, 3959, 9880, 403341, 22890, 65986, 57659, 25948, 9903, 253461, 51341, 23119, 10773, 49854, 23099, 57542, 9278, 8507, 25998, 54442, 27107, 55175, 115207, 9841, 548…	4344	144	12512	1.20012	1	0.986053	73.6189
GOTERM_MF_DIRECT	GO:0001085~RNA polymerase II transcription factor binding	19	0.402457	0.0686736	11060, 7494, 7227, 4205, 2932, 1660, 7157, 1499, 92140, 23013, 9219, 1387, 161882, 468, 3065, 23028, 4089, 9314, 6926	4211	37	11857	1.44591	1	0.849836	70.8393
GOTERM_MF_DIRECT	GO:0015631~tubulin binding	19	0.402457	0.0686736	23637, 84295, 226, 672, 55201, 332, 23287, 55755, 8733, 1605, 6188, 9928, 7411, 1639, 7175, 3925, 2534, 6903, 9654	4211	37	11857	1.44591	1	0.849836	70.8393
UP_SEQ_FEATURE	zinc finger region:C2H2-type 4; atypical	9	0.190638	0.0695752	7701, 57621, 57473, 7561, 55734, 2971, 51341, 23528, 49854	4552	14	13191	1.8629	1	0.997775	76.6404
UP_SEQ_FEATURE	calcium-binding region:4	9	0.190638	0.0695752	57491, 813, 805, 801, 808, 5954, 5955, 5534, 51150	4552	14	13191	1.8629	1	0.997775	76.6404
UP_SEQ_FEATURE	domain:KH 1	12	0.254183	0.0700648	8880, 51320, 10643, 399664, 10644, 8570, 10642, 3069, 5093, 8939, 5094, 3190	4552	21	13191	1.65591	1	0.997744	76.887
UP_SEQ_FEATURE	domain:KH 2	12	0.254183	0.0700648	8880, 51320, 10643, 399664, 10644, 8570, 10642, 3069, 5093, 8939, 5094, 3190	4552	21	13191	1.65591	1	0.997744	76.887
UP_SEQ_FEATURE	repeat:1-1	12	0.254183	0.0700648	811, 7916, 3187, 4638, 23283, 7317, 10492, 1063, 3190, 11100, 6651, 821	4552	21	13191	1.65591	1	0.997744	76.887
GOTERM_BP_DIRECT	GO:0070059~intrinsic apoptotic signaling pathway in response to endoplasmic reticulum stress	16	0.338911	0.072309	4217, 7494, 581, 23645, 2932, 30001, 5366, 1051, 7186, 8795, 468, 58515, 1649, 7009, 9131, 57761	4171	30	11756	1.5032	1	0.933831	77.1321
GOTERM_BP_DIRECT	GO:0010507~negative regulation of autophagy	16	0.338911	0.072309	598, 22933, 11180, 10670, 8672, 207, 57533, 2475, 4170, 1982, 1981, 54922, 23118, 9682, 4233, 387032	4171	30	11756	1.5032	1	0.933831	77.1321
GOTERM_BP_DIRECT	GO:0009116~nucleoside metabolic process	10	0.21182	0.0724299	4833, 353, 5631, 4507, 471, 7372, 4860, 5635, 5634, 5636	4171	16	11756	1.76157	1	0.933192	77.1905
GOTERM_MF_DIRECT	GO:0035064~methylated histone binding	23	0.487185	0.072613	22823, 9425, 5252, 84733, 8535, 54892, 84656, 5929, 1105, 7158, 23613, 23468, 57680, 10927, 8805, 546, 29128, 2956, 148479, 26147, 9682, 11091, 124359	4211	47	11857	1.37791	1	0.862508	72.9036
GOTERM_BP_DIRECT	GO:0038095~Fc-epsilon receptor signaling pathway	49	1.03792	0.0726367	3725, 5717, 5718, 805, 6464, 4775, 801, 5710, 8945, 9861, 5686, 5713, 5685, 5683, 5534, 5716, 7189, 6416, 9491, 10197, 23118, 5708, 5709, 5706, 5707, 5691, 5704, 5609, 5705, 7316, 5702, 6885, 5695, 7314, 5701, 6233, 7311, 5688, 7321, 5689, 8454, 2885, 7322, 808, 5879, 5295, 6654, 5296, 5594	4171	113	11756	1.22219	1	0.932778	77.2903
GOTERM_MF_DIRECT	GO:0031491~nucleosome binding	10	0.21182	0.0728548	254225, 7290, 8467, 11198, 26155, 6830, 10467, 8289, 84939, 50809	4211	16	11857	1.75983	1	0.860092	73.0257
GOTERM_MF_DIRECT	GO:0070034~telomerase RNA binding	10	0.21182	0.0728548	23293, 6628, 3183, 92345, 6634, 55505, 3192, 1736, 54433, 23381	4211	16	11857	1.75983	1	0.860092	73.0257
GOTERM_BP_DIRECT	GO:0016055~Wnt signaling pathway	67	1.41919	0.0738732	4041, 4040, 8322, 10927, 51421, 59343, 27130, 2011, 64359, 54764, 54623, 84445, 81847, 7314, 166, 1855, 7311, 23168, 5494, 8454, 8724, 1654, 8312, 10009, 6934, 1601, 1456, 1459, 1453, 1452, 9368, 1455, 1454, 51699, 8861, 2932, 219771, 8945, 1952, 7474, 1499, 667, 84327, 1500, 79971, 1649, 1540, 139285, 1460, 10042, 1642, 55737, 4139, 79577, 9275, 324, 154810, 7316, 51588, 2870, 6233, 85458, 23184…	4171	160	11756	1.18025	1	0.93499	77.8782
GOTERM_BP_DIRECT	GO:0090090~negative regulation of canonical Wnt signaling pathway	62	1.31328	0.0746454	4040, 9861, 5686, 5685, 5683, 9491, 27130, 10197, 6662, 84133, 5708, 5709, 5706, 26524, 5707, 5691, 5704, 84445, 5705, 5702, 3487, 5695, 166, 1855, 7314, 5701, 2719, 7311, 5688, 5689, 9113, 8312, 10146, 6934, 5717, 1601, 5718, 1958, 1452, 2932, 5710, 5713, 7474, 5716, 6789, 1500, 1649, 1540, 139285, 8994, 2308, 2309, 324, 7316, 857, 6233, 57680, 79960, 54949, 3065, 4300, 23240	4171	147	11756	1.18876	1	0.935983	78.238
GOTERM_BP_DIRECT	GO:0048589~developmental growth	13	0.275365	0.074725	2619, 657, 25836, 6905, 3207, 7458, 57178, 4088, 7298, 4089, 1081, 2778, 259266	4171	23	11756	1.59307	1	0.935266	78.2747
GOTERM_BP_DIRECT	GO:0006306~DNA methylation	13	0.275365	0.074725	51409, 55904, 55729, 2778, 1786, 4297, 79813, 10919, 10664, 11176, 9219, 546, 54815	4171	23	11756	1.59307	1	0.935266	78.2747
UP_SEQ_FEATURE	domain:LisH	14	0.296547	0.0748489	4863, 10048, 5048, 9730, 80232, 54994, 9221, 10296, 6907, 6949, 8481, 57610, 170463, 64795	4552	26	13191	1.56038	1	0.998444	79.1701
GOTERM_CC_DIRECT	GO:0005697~telomerase holoenzyme complex	12	0.254183	0.0751112	23293, 6628, 54552, 3183, 55226, 6634, 55505, 3192, 1736, 54433, 10728, 23381	4343	21	12453	1.6385	1	0.543864	71.4557
UP_KEYWORDS	Protein phosphatase	50	1.0591	0.0755832	23239, 5783, 5782, 5781, 5780, 26469, 5537, 9829, 5536, 85464, 7803, 23035, 5793, 8493, 5792, 1850, 5494, 5495, 5496, 80824, 5501, 5500, 5499, 9110, 5786, 23399, 51496, 8073, 54434, 29101, 1843, 5802, 283871, 29085, 5515, 1849, 1847, 1848, 1845, 8897, 5728, 138639, 54704, 2140, 57546, 79871, 5531, 151742, 994, 995	4583	119	13285	1.21796	1	0.401337	68.5142
GOTERM_BP_DIRECT	GO:0048538~thymus development	18	0.381275	0.0761183	6647, 3720, 5894, 3280, 22890, 5663, 25, 1499, 10370, 8772, 6899, 1399, 51804, 80169, 5591, 7046, 6495, 5594	4171	35	11756	1.44952	1	0.93773	78.9089
UP_KEYWORDS	S-nitrosylation	22	0.466003	0.0768242	328, 7295, 54583, 1017, 3091, 308, 3326, 24145, 37, 1499, 2697, 10105, 7431, 7430, 4478, 3320, 2597, 3065, 3066, 4131, 23411, 4953	4583	46	13285	1.38636	1	0.403114	69.1301
UP_SEQ_FEATURE	compositionally biased region:Arg/Lys-rich (basic)	16	0.338911	0.0772409	8899, 30827, 6634, 7799, 960, 7508, 9360, 10988, 51621, 6201, 7267, 1729, 4820, 387, 6749, 6632	4552	31	13191	1.49566	1	0.998664	80.2297
KEGG_PATHWAY	hsa04115:p53 signaling pathway	31	0.656641	0.0774712	2810, 7249, 6241, 983, 25898, 1647, 51512, 1643, 595, 8493, 5728, 4194, 581, 1017, 4193, 1019, 7157, 5054, 5366, 355, 55240, 64326, 54205, 64065, 472, 9538, 83667, 51246, 891, 900, 7057	1804	64	4809	1.29122	1	0.579411	65.7669
INTERPRO	IPR006594:LisH dimerisation motif	14	0.296547	0.0781826	4863, 10048, 5048, 9730, 80232, 54994, 9221, 10296, 6907, 6949, 8481, 57610, 170463, 64795	4344	26	12512	1.55093	1	0.99231	78.5168
INTERPRO	IPR001878:Zinc finger, CCHC-type	14	0.296547	0.0781826	6432, 7536, 23089, 7156, 54877, 85364, 10898, 23174, 55596, 23318, 5936, 5930, 85437, 7555	4344	26	12512	1.55093	1	0.99231	78.5168
UP_KEYWORDS	Diamond-Blackfan anemia	8	0.169456	0.0786527	6229, 6201, 6135, 6125, 6223, 6154, 6165, 6138	4583	12	13285	1.9325	1	0.40727	70.0171
UP_KEYWORDS	Zinc transport	11	0.233001	0.0798653	7779, 7922, 201266, 27173, 23516, 55334, 29985, 55676, 57181, 10463, 25800	4583	19	13285	1.67823	1	0.408828	70.5921
GOTERM_BP_DIRECT	GO:0016049~cell growth	22	0.466003	0.0800048	7494, 55914, 4853, 155066, 221927, 7298, 55170, 57521, 28956, 2475, 10298, 51602, 6520, 7040, 1655, 26471, 8992, 22803, 9655, 29927, 3575, 259230	4171	45	11756	1.37794	1	0.945479	80.5862
GOTERM_BP_DIRECT	GO:0010212~response to ionizing radiation	22	0.466003	0.0800048	64782, 10524, 79184, 22976, 55159, 2140, 672, 7516, 221927, 6240, 65123, 6794, 3014, 79840, 3383, 64326, 9025, 9112, 472, 79035, 58493, 90381	4171	45	11756	1.37794	1	0.945479	80.5862
GOTERM_BP_DIRECT	GO:0032091~negative regulation of protein binding	24	0.508367	0.0807085	6093, 4043, 1601, 23032, 5300, 54552, 1454, 581, 2932, 10273, 857, 166, 1855, 6790, 5465, 11315, 1663, 9212, 59343, 161882, 5499, 23028, 23394, 7009	4171	50	11756	1.35288	1	0.946119	80.8761
GOTERM_BP_DIRECT	GO:0006123~mitochondrial electron transport, cytochrome c to oxygen	9	0.190638	0.0808538	1351, 9377, 54205, 1350, 4697, 1349, 9167, 1327, 1337	4171	14	11756	1.8119	1	0.945616	80.9354
GOTERM_BP_DIRECT	GO:0030970~retrograde protein transport, ER to cytosol	9	0.190638	0.0808538	23197, 10952, 6400, 7415, 55666, 84447, 7184, 550, 51009	4171	14	11756	1.8119	1	0.945616	80.9354
GOTERM_BP_DIRECT	GO:0032092~positive regulation of protein binding	26	0.550731	0.080856	23032, 65981, 5310, 148022, 2033, 2932, 121665, 7474, 118, 25805, 5986, 6789, 267, 84792, 57761, 8874, 857, 3326, 5901, 340061, 10769, 4221, 567, 2035, 23129, 6934	4171	55	11756	1.33239	1	0.944819	80.9363
GOTERM_BP_DIRECT	GO:0043928~exonucleolytic nuclear-transcribed mRNA catabolic process involved in deadenylation-dependent decay	15	0.317729	0.0811293	57472, 27257, 23644, 118460, 54512, 25804, 80153, 1656, 27258, 23016, 23404, 22894, 115024, 29883, 9337	4171	28	11756	1.50992	1	0.94458	81.0474
INTERPRO	IPR000357:HEAT	8	0.169456	0.0811572	26953, 3837, 5518, 221927, 3843, 9989, 57521, 54919	4344	12	12512	1.9202	1	0.993242	79.7892
GOTERM_MF_DIRECT	GO:0000987~core promoter proximal region sequence-specific DNA binding	9	0.190638	0.0812869	30827, 6670, 1387, 4088, 29128, 9314, 4089, 9658, 7020	4211	14	11857	1.81011	1	0.886705	76.9739
GOTERM_BP_DIRECT	GO:0050852~T cell receptor signaling pathway	51	1.08028	0.0813237	784, 121665, 9861, 5686, 5685, 5683, 10616, 9491, 30968, 10197, 5708, 5709, 5706, 5707, 5704, 5691, 5705, 5702, 6885, 7314, 5695, 5701, 7311, 5688, 5689, 8454, 5594, 4690, 5717, 5718, 5144, 8945, 5710, 5663, 6794, 5713, 5716, 7189, 23118, 1445, 5728, 11119, 9564, 7316, 6233, 27242, 7321, 7322, 2534, 5295, 5296	4171	119	11756	1.20793	1	0.94418	81.1261
GOTERM_MF_DIRECT	GO:0004722~protein serine/threonine phosphatase activity	26	0.550731	0.0817001	23399, 55844, 5537, 5536, 5520, 5518, 8897, 23035, 8493, 5728, 54704, 57546, 79871, 5531, 151742, 5494, 54205, 5495, 5496, 5528, 5501, 5499, 5500, 9110, 92609, 84919	4211	55	11857	1.33107	1	0.885049	77.1526
SMART	SM00184:RING	75	1.58865	0.0819487	10206, 55905, 7844, 57534, 57674, 330, 10616, 25898, 51320, 25897, 5987, 29128, 64219, 23077, 10155, 56254, 25820, 51132, 11043, 84133, 11236, 10336, 672, 6737, 55298, 81847, 84447, 84900, 26001, 64326, 9867, 55658, 58508, 57661, 6015, 84333, 149603, 5930, 84851, 84231, 89970, 55159, 868, 81559, 56658, 10425, 22954, 254225, 7189, 7188, 7186, 113878, 23295, 9025, 221687, 9169, 267, 9810, 90933, 23…	2429	184	6919	1.16107	1	0.887681	72.5642
INTERPRO	IPR015940:Ubiquitin-associated/translation elongation factor EF1B, N-terminal, eukaryote	20	0.423639	0.0822139	29978, 90957, 23387, 4139, 26524, 868, 9898, 23358, 10075, 9113, 55187, 51271, 6248, 57690, 5887, 150094, 2011, 5886, 54861, 4140	4344	41	12512	1.40502	1	0.993273	80.2239
GOTERM_CC_DIRECT	GO:0070469~respiratory chain	8	0.169456	0.0829689	54205, 4726, 4702, 25994, 440567, 4700, 10975, 27089	4343	12	12453	1.91158	1	0.578148	75.1101
GOTERM_CC_DIRECT	GO:0005750~mitochondrial respiratory chain complex III	8	0.169456	0.0829689	29796, 790955, 7388, 440567, 7386, 617, 27089, 7384	4343	12	12453	1.91158	1	0.578148	75.1101
BIOCARTA	h_gcrpathway:Corticosteroids and cardioprotection	10	0.21182	0.08325	2782, 805, 3320, 301, 2908, 801, 808, 2778, 5295, 207	520	15	1324	1.69744	1	0.746251	68.3935
GOTERM_BP_DIRECT	GO:0006295~nucleotide-excision repair, DNA incision, 3'-to lesion	12	0.254183	0.083995	2067, 8451, 2072, 6117, 8450, 1643, 9557, 404672, 142, 2968, 1642, 2967	4171	21	11756	1.61058	1	0.948692	82.1761
GOTERM_BP_DIRECT	GO:0051321~meiotic cell cycle	12	0.254183	0.083995	4926, 10927, 5515, 400629, 9724, 9184, 24149, 22933, 3014, 5932, 9156, 10735	4171	21	11756	1.61058	1	0.948692	82.1761
GOTERM_BP_DIRECT	GO:0006509~membrane protein ectodomain proteolysis	12	0.254183	0.083995	27316, 4627, 25825, 55851, 121665, 56928, 5663, 23385, 1605, 102, 51107, 81502	4171	21	11756	1.61058	1	0.948692	82.1761
GOTERM_MF_DIRECT	GO:0008601~protein phosphatase type 2A regulator activity	12	0.254183	0.0845365	5525, 5529, 5528, 5518, 5527, 6418, 23141, 55844, 3476, 10776, 2029, 5520	4211	21	11857	1.60898	1	0.89089	78.3447
INTERPRO	IPR009072:Histone-fold	27	0.571913	0.0859118	8969, 8338, 54107, 9555, 6874, 387103, 4802, 92815, 8364, 94239, 10061, 8367, 126961, 6883, 3014, 3015, 3017, 3021, 6875, 1810, 8336, 85236, 8334, 8358, 6654, 8330, 8356	4344	59	12512	1.3181	1	0.994329	81.6761
UP_KEYWORDS	Nuclease	44	0.932006	0.0860853	5894, 84126, 29102, 2072, 348654, 60528, 90459, 92667, 3726, 55218, 23293, 5511, 146956, 23405, 23404, 85463, 22803, 9797, 22894, 246243, 201626, 57455, 64782, 53918, 2067, 57472, 80746, 5424, 328, 55775, 10535, 1777, 51567, 27301, 81875, 2237, 7247, 10146, 112479, 64858, 29883, 9337, 5932, 9156	4583	104	13285	1.2264	1	0.430144	73.3836
BIOCARTA	h_uCalpainPathway:uCalpain and friends in Cell spread	9	0.190638	0.0864929	7430, 823, 387, 826, 7094, 5829, 5879, 87, 6709	520	13	1324	1.76272	1	0.74133	69.8434
GOTERM_BP_DIRECT	GO:0030521~androgen receptor signaling pathway	19	0.402457	0.0877222	9967, 10524, 8554, 9969, 9968, 3301, 672, 8031, 2288, 5901, 8204, 7337, 9063, 5469, 1499, 8611, 1616, 1022, 8289	4171	38	11756	1.40925	1	0.954617	83.549
SMART	SM00333:TUDOR	11	0.233001	0.0885692	9869, 22823, 5252, 8165, 10285, 23424, 51742, 26147, 51230, 9682, 6607	2429	19	6919	1.64913	1	0.898704	75.4093
UP_KEYWORDS	DNA condensation	7	0.148274	0.0889534	29781, 64151, 54892, 23397, 8091, 148479, 10051	4583	10	13285	2.02913	1	0.437754	74.5857
BIOCARTA	h_eif2Pathway:Regulation of eIF2	8	0.169456	0.0889582	1983, 27102, 5499, 1968, 2932, 1965, 8894, 440275	520	11	1324	1.85175	1	0.733655	70.9042
UP_SEQ_FEATURE	domain:MATH	7	0.148274	0.0890748	7189, 7188, 7187, 7186, 9618, 8405, 7874	4552	10	13191	2.02849	1	0.999504	84.7602
UP_SEQ_FEATURE	compositionally biased region:Gly/Ser-rich	7	0.148274	0.0890748	4302, 6416, 7528, 23248, 1958, 1654, 64783	4552	10	13191	2.02849	1	0.999504	84.7602
GOTERM_MF_DIRECT	GO:0008565~protein transporter activity	29	0.614277	0.0891515	26517, 10527, 10526, 51699, 8943, 3843, 3842, 23633, 8615, 27315, 9670, 23214, 55737, 401505, 26953, 3837, 3836, 3839, 3838, 112936, 30000, 9559, 163, 164, 9765, 7095, 29098, 26520, 55705	4211	63	11857	1.29613	1	0.901226	80.1598
GOTERM_MF_DIRECT	GO:0004721~phosphoprotein phosphatase activity	21	0.444821	0.0898867	23239, 5728, 5782, 5781, 51496, 5537, 5531, 5536, 54434, 994, 995, 283871, 80824, 5515, 29085, 5501, 5500, 5499, 92609, 85464, 9989	4211	43	11857	1.37512	1	0.90055	80.4354
BIOCARTA	h_setPathway:Granzyme A mediated Apoptosis Pathway	7	0.148274	0.0899542	1676, 3148, 328, 1387, 6418, 9731, 8125	520	9	1324	1.98034	1	0.720502	71.3229
GOTERM_BP_DIRECT	GO:0032897~negative regulation of viral transcription	8	0.169456	0.0902189	11043, 10206, 10410, 5987, 6737, 81559, 22954, 81603	4171	12	11756	1.87901	1	0.957968	84.4118
GOTERM_BP_DIRECT	GO:0019731~antibacterial humoral response	8	0.169456	0.0902189	6170, 2197, 85236, 567, 3133, 3105, 351, 3017	4171	12	11756	1.87901	1	0.957968	84.4118
GOTERM_BP_DIRECT	GO:0043409~negative regulation of MAPK cascade	8	0.169456	0.0902189	1843, 2950, 55870, 4771, 857, 1605, 1845, 5716	4171	12	11756	1.87901	1	0.957968	84.4118
GOTERM_BP_DIRECT	GO:0000028~ribosomal small subunit assembly	8	0.169456	0.0902189	5822, 6223, 3921, 26284, 6208, 51081, 6209, 6193	4171	12	11756	1.87901	1	0.957968	84.4118
GOTERM_BP_DIRECT	GO:0070306~lens fiber cell differentiation	8	0.169456	0.0902189	7040, 51343, 23424, 4771, 4088, 6498, 4094, 10765	4171	12	11756	1.87901	1	0.957968	84.4118
GOTERM_BP_DIRECT	GO:0008334~histone mRNA metabolic process	8	0.169456	0.0902189	7884, 6628, 6637, 6636, 84967, 22916, 6634, 6741	4171	12	11756	1.87901	1	0.957968	84.4118
GOTERM_BP_DIRECT	GO:0061014~positive regulation of mRNA catabolic process	8	0.169456	0.0902189	23019, 8570, 10236, 5976, 56829, 29883, 9337, 9567	4171	12	11756	1.87901	1	0.957968	84.4118
GOTERM_BP_DIRECT	GO:0010510~regulation of acetyl-CoA biosynthetic process from pyruvate	8	0.169456	0.0902189	5166, 54704, 5165, 57546, 5162, 1738, 5160, 55066	4171	12	11756	1.87901	1	0.957968	84.4118
GOTERM_MF_DIRECT	GO:0000980~RNA polymerase II distal enhancer sequence-specific DNA binding	25	0.529549	0.0904505	3725, 9968, 4779, 6599, 571, 6598, 6597, 1108, 10856, 5457, 6421, 9219, 4780, 60, 4841, 2063, 5928, 1385, 3015, 53615, 3021, 3183, 3065, 3066, 6601	4211	53	11857	1.32817	1	0.899429	80.6442
GOTERM_MF_DIRECT	GO:0008143~poly(A) binding	8	0.169456	0.0906553	9775, 9987, 1654, 79882, 8761, 10492, 10657, 26986	4211	12	11857	1.87715	1	0.897355	80.7196
GOTERM_MF_DIRECT	GO:0017160~Ral GTPase binding	8	0.169456	0.0906553	23032, 55770, 149371, 83871, 2316, 60412, 10928, 4641	4211	12	11857	1.87715	1	0.897355	80.7196
GOTERM_BP_DIRECT	GO:0006378~mRNA polyadenylation	14	0.296547	0.0911748	11052, 54623, 53981, 1477, 51585, 79577, 2926, 55149, 10898, 10978, 351, 29101, 10914, 26986	4171	26	11756	1.51766	1	0.958784	84.7306
UP_KEYWORDS	Glucose metabolism	10	0.21182	0.0914482	5166, 2539, 5165, 5162, 5236, 5160, 9563, 55276, 207, 208	4583	17	13285	1.70515	1	0.443743	75.5901
INTERPRO	IPR005818:Histone H1/H5	7	0.148274	0.0914699	23522, 7994, 3005, 3006, 8971, 50809, 3008	4344	10	12512	2.01621	1	0.99573	83.6703
INTERPRO	IPR001293:Zinc finger, TRAF-type	7	0.148274	0.0914699	7189, 7188, 7187, 7186, 9618, 84085, 84231	4344	10	12512	2.01621	1	0.99573	83.6703
INTERPRO	IPR002083:MATH	7	0.148274	0.0914699	7189, 7188, 7187, 7186, 9618, 8405, 7874	4344	10	12512	2.01621	1	0.99573	83.6703
INTERPRO	IPR019956:Ubiquitin subgroup	7	0.148274	0.0914699	2197, 4738, 7316, 8266, 7314, 6233, 7311	4344	10	12512	2.01621	1	0.99573	83.6703
UP_SEQ_FEATURE	metal ion-binding site:Iron; catalytic	10	0.21182	0.0916073	200424, 23210, 80312, 84678, 51780, 22992, 9682, 121642, 55662, 221037	4552	17	13191	1.70462	1	0.999576	85.5922
GOTERM_CC_DIRECT	GO:0005761~mitochondrial ribosome	13	0.275365	0.091672	78988, 64976, 55052, 65005, 26164, 29074, 51258, 92170, 63931, 84545, 64983, 118487, 64981	4343	24	12453	1.55316	1	0.613179	78.6436
GOTERM_CC_DIRECT	GO:0034663~endoplasmic reticulum chaperone complex	7	0.148274	0.0932852	10525, 10130, 23753, 5479, 3309, 5034, 7184	4343	10	12453	2.00716	1	0.616729	79.2445
GOTERM_CC_DIRECT	GO:0097504~Gemini of coiled bodies	7	0.148274	0.0932852	4863, 79760, 50628, 79833, 11218, 6607, 25929	4343	10	12453	2.00716	1	0.616729	79.2445
GOTERM_MF_DIRECT	GO:0043130~ubiquitin binding	34	0.720186	0.0935656	23636, 10208, 23032, 64771, 22933, 92181, 22954, 10616, 57414, 23197, 54472, 25793, 51271, 54476, 7852, 55666, 8445, 550, 29761, 329, 81930, 7153, 9373, 137886, 51160, 7319, 7345, 9184, 4088, 10600, 11047, 1164, 83932, 27000	4211	76	11857	1.25966	1	0.902423	81.761
GOTERM_BP_DIRECT	GO:0008286~insulin receptor signaling pathway	32	0.677822	0.0942115	9550, 5166, 6599, 6464, 155066, 3480, 535, 1978, 8992, 55023, 537, 1979, 2308, 2303, 9564, 8660, 9296, 207, 208, 523, 5590, 2887, 10458, 2885, 3667, 6720, 5786, 5295, 8471, 6654, 5296, 527	4171	71	11756	1.27031	1	0.962542	85.7029
GOTERM_BP_DIRECT	GO:0010165~response to X-ray	11	0.233001	0.0946026	595, 79184, 2067, 675, 301, 121457, 7516, 4436, 7157, 641, 5366	4171	19	11756	1.63177	1	0.962482	85.8237
GOTERM_BP_DIRECT	GO:0001975~response to amphetamine	11	0.233001	0.0946026	3251, 6647, 805, 4929, 801, 84687, 3065, 808, 3066, 3383, 5903	4171	19	11756	1.63177	1	0.962482	85.8237
UP_KEYWORDS	Exonuclease	22	0.466003	0.0951725	64782, 57472, 328, 5424, 55775, 84126, 90459, 92667, 27301, 55218, 81875, 2237, 23404, 22803, 22894, 112479, 64858, 29883, 201626, 9337, 9156, 57455	4583	47	13285	1.35686	1	0.454076	77.0208
SMART	SM00061:MATH	7	0.148274	0.0958638	7189, 7188, 7187, 7186, 9618, 8405, 7874	2429	10	6919	1.99395	1	0.90975	78.2238
SMART	SM00387:HATPase_c	7	0.148274	0.0958638	5166, 3320, 5165, 3326, 10131, 10295, 7184	2429	10	6919	1.99395	1	0.90975	78.2238
SMART	SM00526:H15	7	0.148274	0.0958638	23522, 7994, 3005, 3006, 8971, 50809, 3008	2429	10	6919	1.99395	1	0.90975	78.2238
GOTERM_CC_DIRECT	GO:0005844~polysome	17	0.360093	0.0961546	811, 10985, 8531, 26019, 1965, 4733, 6188, 7411, 1981, 1975, 84316, 7458, 85451, 6191, 2521, 6194, 440275	4343	34	12453	1.43369	1	0.625286	80.2744
GOTERM_CC_DIRECT	GO:0005669~transcription factor TFIID complex	17	0.360093	0.0961546	2067, 83860, 8721, 2072, 6883, 6874, 404672, 7157, 6879, 2962, 6875, 2960, 6908, 2957, 2958, 2968, 2967	4343	34	12453	1.43369	1	0.625286	80.2744
GOTERM_MF_DIRECT	GO:0043531~ADP binding	16	0.338911	0.0962669	4650, 56997, 4436, 7415, 476, 5634, 54471, 5536, 5028, 513, 5631, 1727, 4627, 2956, 4628, 5315	4211	31	11857	1.45328	1	0.906656	82.6799
GOTERM_MF_DIRECT	GO:0000981~RNA polymerase II transcription factor activity, sequence-specific DNA binding	49	1.03792	0.0967896	7750, 3725, 7494, 988, 7753, 4205, 2005, 7027, 6621, 7020, 221937, 3726, 9202, 2296, 8462, 9203, 9204, 6662, 6493, 5978, 7690, 54862, 84838, 8553, 121274, 27086, 9849, 5457, 5612, 9852, 7270, 58486, 1999, 79830, 54870, 657, 7566, 2308, 5245, 5093, 2305, 7157, 6668, 5469, 6670, 468, 54989, 9988, 10782	4211	115	11857	1.19974	1	0.905495	82.8526
GOTERM_BP_DIRECT	GO:0030334~regulation of cell migration	28	0.593095	0.0972382	55920, 154796, 114803, 8861, 23654, 2316, 7414, 10672, 9928, 84612, 9748, 84962, 7040, 388, 387, 7852, 57142, 5361, 55171, 207, 208, 182, 6446, 3911, 5879, 23129, 55558, 4690	4171	61	11756	1.29374	1	0.965369	86.6133
UP_KEYWORDS	Congenital disorder of glycosylation	20	0.423639	0.097476	79868, 9382, 4351, 79644, 22845, 55858, 5373, 85365, 1798, 3703, 4247, 79087, 790, 1650, 29929, 8818, 5236, 9526, 6748, 201595	4583	42	13285	1.38036	1	0.458982	77.8661
GOTERM_CC_DIRECT	GO:0043231~intracellular membrane-bounded organelle	185	3.91866	0.0983911	688, 10897, 22872, 653820, 26750, 1106, 5160, 8675, 27332, 949, 5536, 22905, 1522, 3480, 535, 54812, 57178, 2956, 65056, 10825, 728833, 8021, 2017, 54998, 5447, 6782, 9445, 55858, 476, 23644, 1798, 7879, 1717, 9869, 163, 7411, 164, 51622, 84897, 8725, 80174, 27327, 23063, 9054, 1495, 10142, 9052, 55558, 23636, 7514, 9368, 26065, 51699, 219, 205564, 10226, 7415, 1595, 3843, 10670, 373156, 6888, 51…	4343	488	12453	1.08702	1	0.631061	81.0437
GOTERM_MF_DIRECT	GO:0050681~androgen receptor binding	18	0.381275	0.0988378	811, 10524, 8554, 2033, 6597, 672, 8031, 27086, 5901, 8204, 1499, 9063, 11315, 1616, 1022, 1655, 23028, 64324	4211	36	11857	1.40786	1	0.907983	83.5139
GOTERM_MF_DIRECT	GO:0051287~NAD binding	18	0.381275	0.0988378	1487, 23530, 9380, 84656, 1738, 4190, 4723, 11112, 191, 3939, 3030, 1727, 2597, 3419, 26227, 6652, 3945, 142	4211	36	11857	1.40786	1	0.907983	83.5139
GOTERM_BP_DIRECT	GO:0006950~response to stress	24	0.508367	0.0992235	5600, 10963, 10209, 4869, 1956, 9261, 27230, 3326, 5612, 2475, 8303, 79960, 3320, 1647, 27102, 22926, 6446, 29923, 231, 23049, 10598, 10131, 7184, 5594	4171	51	11756	1.32636	1	0.967253	87.1803
GOTERM_BP_DIRECT	GO:0016241~regulation of macroautophagy	20	0.423639	0.0992628	55737, 29978, 8851, 9550, 823, 826, 51100, 155066, 112936, 23265, 9559, 7345, 149371, 523, 27131, 535, 2597, 8992, 60412, 527	4171	41	11756	1.37488	1	0.966763	87.1913

## Sheet: YTHDC2
Category	Term	Count	%	PValue	Genes	List Total	Pop Hits	Pop Total	Fold Enrichment	Bonferroni	Benjamini	FDR
GOTERM_CC_DIRECT	GO:0070062~extracellular exosome	128	46.5455	1.65364e-34	9349, 1191, 682, 6205, 7296, 10409, 2950, 7167, 8878, 6566, 3921, 8407, 6217, 476, 1327, 5034, 6158, 5036, 3856, 6156, 10097, 6223, 3915, 10094, 3916, 2023, 11331, 7203, 4691, 10728, 5216, 26986, 6181, 79567, 1434, 54732, 826, 2316, 5355, 3312, 6281, 2783, 821, 3315, 1072, 10016, 2597, 3945, 811, 6275, 57142, 226, 6277, 8662, 2778, 3326, 5052, 3015, 3017, 7431, 7916, 6203, 5339, 10606, 396, 20306…	248	2190	12453	2.93487	5.67199e-32	5.67199e-32	2.25486e-31
UP_KEYWORDS	Acetylation	143	52	1.65885e-29	9343, 3006, 3476, 6205, 7296, 6209, 2950, 1729, 7167, 8878, 3921, 10155, 8407, 476, 7407, 1327, 5034, 6158, 5036, 3856, 6156, 1982, 5831, 10097, 6223, 10094, 2023, 11331, 7203, 4691, 10728, 5216, 4609, 26986, 11083, 6181, 6184, 1434, 54732, 826, 2316, 3312, 6281, 821, 23633, 2783, 51692, 3315, 1072, 10016, 2597, 10949, 23326, 84790, 9168, 3945, 10801, 5763, 811, 401505, 6275, 10514, 57142, 226, 7…	252	3156	13285	2.38869	4.74431e-27	4.74431e-27	2.20056e-26
GOTERM_MF_DIRECT	GO:0044822~poly(A) RNA binding	79	28.7273	2.23616e-25	9349, 6122, 9343, 1938, 6161, 1107, 6205, 3006, 10399, 6209, 55544, 6520, 1729, 2194, 1665, 2896, 3191, 4150, 81, 3921, 8971, 10155, 8367, 3105, 302, 6217, 23367, 5034, 6158, 5036, 6156, 1982, 445, 375, 25873, 6223, 2023, 5935, 5315, 7203, 4691, 6193, 5216, 26986, 11083, 6184, 64710, 2935, 2316, 1029, 3312, 821, 3315, 9123, 10949, 104, 103, 811, 6275, 57142, 10514, 6132, 226, 6624, 6130, 3838, 64…	241	1060	11857	3.66673	1.17175e-22	1.17175e-22	3.24139e-22
GOTERM_CC_DIRECT	GO:0016020~membrane	100	36.3636	2.62292e-22	9349, 9343, 682, 79709, 6161, 6205, 79143, 6209, 6566, 3921, 6217, 1327, 476, 6158, 5036, 6156, 1982, 10097, 6223, 10094, 3916, 2023, 11331, 4691, 5216, 26986, 6181, 6184, 1434, 826, 2316, 5355, 3312, 9361, 2783, 821, 23633, 6185, 1072, 10942, 2597, 103, 819, 3945, 811, 10514, 226, 3838, 2778, 3326, 6203, 7916, 10606, 10594, 2821, 1938, 2683, 3383, 6520, 2194, 3191, 3106, 8367, 708, 3105, 506, 97…	248	1869	12453	2.68666	8.9966e-20	4.4983e-20	3.57653e-19
GOTERM_CC_DIRECT	GO:0031012~extracellular matrix	36	13.0909	2.90545e-22	9349, 6184, 9343, 1191, 1938, 2316, 6205, 3312, 821, 4000, 3315, 1072, 10383, 2192, 5654, 2597, 8367, 811, 7837, 506, 5118, 302, 6217, 3309, 5034, 5052, 6156, 5339, 7431, 6223, 3915, 203068, 71, 5315, 6193, 3959	248	217	12453	8.33039	9.9657e-20	3.3219e-20	3.96179e-19
GOTERM_CC_DIRECT	GO:0005925~focal adhesion	41	14.9091	7.88213e-19	6181, 9349, 6122, 6141, 682, 966, 2316, 6205, 3312, 1605, 6209, 2783, 3315, 3383, 1072, 84962, 81, 60, 811, 3304, 976, 6132, 6130, 6217, 3159, 3309, 5034, 6156, 5339, 7431, 6203, 10097, 375, 6223, 10094, 4162, 71, 2022, 6193, 5216, 26986	248	370	12453	5.56422	2.70357e-16	6.75893e-17	1.07478e-15
UP_KEYWORDS	Ubl conjugation	75	27.2727	3.05438e-15	9289, 6122, 9343, 1191, 1938, 10951, 1107, 3476, 7296, 9927, 4000, 3383, 10409, 1051, 6520, 2194, 7167, 3191, 7852, 3106, 26227, 10155, 8367, 3105, 415116, 302, 5709, 23367, 3309, 5036, 112939, 10376, 3856, 8452, 2023, 149603, 5315, 7203, 64324, 4691, 8358, 11047, 4609, 5216, 84231, 6184, 2316, 1029, 23770, 3312, 6185, 821, 51692, 2597, 10949, 103, 8140, 60, 226, 6624, 2305, 2778, 54541, 3326, 50…	252	1509	13285	2.62019	8.89067e-13	4.44533e-13	4.11893e-12
UP_KEYWORDS	Isopeptide bond	59	21.4545	8.15225e-15	6122, 9343, 1938, 10951, 1107, 3006, 4000, 10409, 1051, 10383, 6520, 1729, 2194, 7167, 3191, 26227, 81, 10155, 8367, 302, 5709, 23367, 3309, 112939, 10376, 3856, 8452, 71, 149603, 5315, 64324, 4691, 7203, 11047, 5216, 6184, 2316, 23770, 3312, 6185, 51692, 10949, 8140, 103, 60, 226, 6624, 2305, 2778, 5052, 3015, 3017, 7431, 6227, 203068, 396, 8334, 3068, 7009	252	1008	13285	3.08569	2.31792e-12	7.72604e-13	1.0747e-11
GOTERM_BP_DIRECT	GO:0006413~translational initiation	22	8	5.71289e-14	6181, 9349, 6122, 6132, 6141, 6130, 6161, 6217, 6205, 8662, 23367, 6158, 6209, 6156, 6203, 1982, 6227, 25873, 6223, 3921, 6193, 26986	242	123	11756	8.68884	9.09106e-11	9.09106e-11	9.56679e-11
GOTERM_BP_DIRECT	GO:0000184~nuclear-transcribed mRNA catabolic process, nonsense-mediated decay	21	7.63636	7.99539e-14	6181, 9349, 6122, 6132, 6141, 6130, 2935, 6161, 6217, 6205, 6158, 6209, 6156, 6203, 6227, 25873, 5518, 6223, 3921, 6193, 26986	242	111	11756	9.19053	1.27098e-10	6.35492e-11	1.33749e-10
GOTERM_BP_DIRECT	GO:0006614~SRP-dependent cotranslational protein targeting to membrane	19	6.90909	1.1857e-13	6181, 9349, 6122, 6132, 6141, 6130, 6161, 6217, 6205, 6158, 6209, 6156, 6203, 6227, 25873, 6223, 3921, 6193, 29927	242	87	11756	10.6091	1.88529e-10	6.28431e-11	1.98397e-10
GOTERM_CC_DIRECT	GO:0043209~myelin sheath	22	8	5.8262e-13	506, 6624, 476, 3312, 3309, 22948, 5052, 821, 2783, 10376, 4722, 4282, 10383, 26227, 7086, 71, 1152, 5315, 60, 7203, 3945, 2821	248	142	12453	7.77959	1.99847e-10	3.99695e-11	7.94476e-10
GOTERM_MF_DIRECT	GO:0098641~cadherin binding involved in cell-cell adhesion	29	10.5455	2.62798e-12	682, 1938, 2316, 10399, 3312, 6520, 2194, 8971, 10801, 3304, 57142, 302, 8407, 6624, 6130, 226, 23367, 3309, 5052, 3326, 5339, 1982, 10606, 5770, 2023, 5315, 64855, 8358, 5216	241	281	11857	5.07749	1.37708e-09	6.88538e-10	3.80939e-09
GOTERM_CC_DIRECT	GO:0005913~cell-cell adherens junction	30	10.9091	2.73359e-12	682, 1938, 2316, 10399, 3312, 1605, 6520, 2194, 8971, 10801, 3304, 57142, 302, 8407, 6624, 6130, 226, 23367, 3309, 5052, 3326, 5339, 1982, 10606, 5770, 2023, 64855, 5315, 8358, 5216	248	308	12453	4.89095	9.37622e-10	1.5627e-10	3.72744e-09
UP_KEYWORDS	Ribonucleoprotein	26	9.45455	2.43955e-11	6181, 9349, 6122, 6141, 9343, 6161, 6205, 6209, 51692, 28973, 10949, 3191, 3921, 6132, 6130, 6217, 51116, 6158, 5036, 6156, 6203, 6227, 25873, 6223, 10594, 6193	252	261	13285	5.25163	6.97711e-09	1.74428e-09	3.23621e-08
GOTERM_BP_DIRECT	GO:0098609~cell-cell adhesion	27	9.81818	3.4248e-11	682, 1938, 10399, 3312, 6520, 2194, 8971, 10801, 57142, 302, 8407, 6624, 6130, 226, 23367, 5052, 3326, 3309, 5339, 1982, 10606, 5770, 2023, 5315, 64855, 8358, 5216	242	266	11756	4.9309	5.44544e-08	1.36136e-08	5.73054e-08
GOTERM_BP_DIRECT	GO:0019083~viral transcription	18	6.54545	3.74104e-11	6181, 9349, 6122, 6132, 6141, 6130, 6161, 6217, 6205, 6158, 6209, 6156, 6203, 6227, 25873, 6223, 3921, 6193	242	105	11756	8.32774	5.94825e-08	1.18965e-08	6.25968e-08
GOTERM_CC_DIRECT	GO:0005829~cytosol	103	37.4545	5.12099e-11	9349, 1191, 6161, 3476, 6205, 7296, 6209, 9927, 55544, 2950, 1729, 7167, 8878, 3921, 6217, 7407, 6158, 6156, 1982, 10097, 6223, 10094, 3916, 2023, 7203, 10728, 5216, 4609, 26986, 6181, 1434, 826, 2316, 3312, 2783, 23633, 3315, 2597, 171177, 4946, 3945, 5763, 811, 226, 3838, 6277, 8662, 2778, 54541, 3326, 5052, 6203, 5339, 7431, 10606, 396, 5770, 2821, 6723, 6122, 1938, 10399, 4000, 10383, 84962, …	248	2844	12453	1.81857	1.7565e-08	2.50929e-09	6.98284e-08
UP_KEYWORDS	Ribosomal protein	20	7.27273	2.13042e-10	6181, 9349, 6122, 6132, 6141, 6130, 6161, 6217, 6205, 51116, 6158, 6209, 6156, 6203, 28973, 6227, 25873, 6223, 3921, 6193	252	162	13285	6.50843	6.09301e-08	1.2186e-08	2.82613e-07
GOTERM_MF_DIRECT	GO:0005515~protein binding	191	69.4545	4.07654e-10	9349, 9343, 1191, 682, 6205, 3006, 1107, 3476, 7296, 6209, 9927, 79143, 10409, 1729, 2950, 7167, 8878, 10712, 3921, 10155, 8407, 415116, 6217, 476, 7407, 1327, 1081, 5034, 6158, 5036, 3856, 6156, 4833, 1982, 5831, 6223, 3916, 10094, 2023, 149603, 51435, 11331, 2022, 5935, 7203, 4691, 10728, 26986, 5216, 4609, 6181, 3219, 6184, 1434, 4779, 54732, 826, 2316, 5355, 3312, 9361, 6281, 6185, 23633, 821…	241	7180	11857	1.30878	2.13611e-07	7.12036e-08	5.90908e-07
GOTERM_CC_DIRECT	GO:0005840~ribosome	19	6.90909	8.45293e-10	6181, 9349, 6122, 6132, 6141, 6130, 6161, 6217, 6205, 51116, 6158, 821, 6209, 6156, 6203, 28973, 6227, 25873, 6223	248	149	12453	6.40309	2.89935e-07	3.62419e-08	1.15262e-06
GOTERM_MF_DIRECT	GO:0003735~structural constituent of ribosome	21	7.63636	1.56646e-09	6181, 9349, 6122, 6132, 6141, 6130, 6161, 6217, 6205, 51116, 51629, 6158, 6209, 6156, 6203, 28973, 6227, 25873, 6223, 3921, 6193	241	190	11857	5.4378	8.20825e-07	2.05206e-07	2.27063e-06
GOTERM_CC_DIRECT	GO:0042470~melanosome	15	5.45455	3.21504e-09	6184, 302, 6509, 682, 476, 3312, 5052, 3326, 5034, 3309, 821, 6520, 2194, 6510, 3916	248	92	12453	8.18702	1.10276e-06	1.22529e-07	4.38393e-06
GOTERM_BP_DIRECT	GO:0006412~translation	22	8	4.48754e-09	6181, 9349, 6122, 6132, 6141, 9343, 6130, 6161, 6217, 6205, 51116, 51629, 6158, 6209, 6156, 6203, 28973, 6227, 25873, 6223, 3921, 6193	242	220	11756	4.85785	7.13516e-06	1.1892e-06	7.50875e-06
UP_KEYWORDS	Methylation	43	15.6364	5.41605e-09	1938, 3006, 6205, 3312, 4000, 3315, 1051, 54663, 7167, 2597, 10949, 3191, 10634, 103, 60, 8367, 3304, 8407, 23367, 3159, 3309, 3015, 10376, 3856, 3017, 7916, 5339, 1982, 80139, 6223, 10574, 203068, 10594, 10749, 71, 149603, 5935, 8334, 5315, 4691, 8358, 26986, 11083	252	839	13285	2.70189	1.54899e-06	2.58165e-07	7.18472e-06
KEGG_PATHWAY	hsa03010:Ribosome	19	6.90909	5.97497e-09	6181, 9349, 6122, 6132, 6141, 6130, 6161, 6217, 6205, 51116, 6158, 6209, 6156, 6203, 6227, 25873, 6223, 3921, 6193	139	121	4809	5.43261	1.19499e-06	1.19499e-06	7.48901e-06
UP_KEYWORDS	Phosphoprotein	177	64.3636	2.91214e-08	29123, 9349, 9343, 1191, 682, 6161, 3006, 1107, 3476, 6205, 7296, 9927, 10409, 1729, 2950, 7167, 8878, 10712, 6566, 3921, 10155, 8407, 415116, 476, 7407, 1327, 5034, 6158, 112939, 5036, 3856, 6156, 1982, 5831, 3915, 10094, 2023, 11331, 2022, 5935, 7203, 64324, 4691, 10728, 26986, 4609, 5216, 11083, 6181, 3219, 79567, 1434, 64710, 826, 2316, 3312, 23633, 821, 2783, 51692, 3315, 1072, 2597, 10949, …	252	7078	13285	1.31833	8.32869e-06	1.18982e-06	3.86313e-05
GOTERM_BP_DIRECT	GO:0006364~rRNA processing	20	7.27273	2.95491e-08	6181, 9349, 6122, 6132, 6141, 6130, 6161, 6217, 1029, 6205, 6158, 6209, 5036, 6156, 6203, 6227, 25873, 6223, 3921, 6193	242	201	11756	4.83368	4.69819e-05	6.71183e-06	4.94428e-05
GOTERM_CC_DIRECT	GO:0005737~cytoplasm	125	45.4545	2.97182e-08	29123, 9349, 9343, 1191, 3476, 1107, 6205, 6209, 10409, 2950, 8878, 3921, 415116, 6158, 112939, 5036, 3856, 6156, 10097, 6223, 10094, 3916, 149603, 2023, 11331, 5935, 2022, 7203, 10728, 5216, 26986, 11083, 79567, 1434, 4779, 64710, 2316, 9361, 23633, 3315, 1072, 10942, 10016, 2597, 3399, 4946, 84790, 104, 9168, 103, 145508, 3945, 10801, 811, 10514, 3838, 6277, 22907, 8662, 2305, 2778, 54541, 3326…	248	4164	12453	1.50738	1.01933e-05	1.01933e-06	4.05228e-05
GOTERM_CC_DIRECT	GO:0005615~extracellular space	39	14.1818	3.06037e-08	1191, 966, 2683, 3312, 1605, 2783, 3315, 3383, 1072, 2192, 2950, 7167, 5654, 2896, 81, 1152, 60, 708, 811, 6275, 976, 7837, 5118, 302, 226, 10491, 5052, 3017, 4282, 10439, 3915, 396, 4162, 2023, 71, 2022, 3068, 2821, 3959	248	723	12453	2.70862	1.0497e-05	9.5428e-07	4.17304e-05
GOTERM_CC_DIRECT	GO:0015935~small ribosomal subunit	8	2.90909	5.2891e-07	6203, 6227, 6217, 10399, 51116, 3921, 6209, 6193	248	26	12453	15.4504	0.0001814	1.51179e-05	0.000721204
GOTERM_CC_DIRECT	GO:0030529~intracellular ribonucleoprotein complex	14	5.09091	1.14504e-06	9343, 1938, 3312, 51692, 5036, 6203, 2597, 10949, 3191, 81, 60, 4691, 6193, 26986	248	125	12453	5.62394	0.000392673	3.02111e-05	0.00156134
GOTERM_BP_DIRECT	GO:0050821~protein stabilization	14	5.09091	1.49325e-06	811, 3304, 1191, 2597, 10574, 3916, 2316, 1029, 10491, 11331, 7203, 22948, 3326, 5216	242	124	11756	5.48467	0.00237146	0.00029674	0.00249855
UP_SEQ_FEATURE	cross-link:Glycyl lysine isopeptide (Lys-Gly) (interchain with G-Cter in ubiquitin)	16	5.81818	2.26979e-06	3006, 2778, 6185, 3015, 10376, 3017, 6520, 1729, 203068, 81, 8334, 8140, 7009, 11047, 8358, 5216	250	185	13191	4.56337	0.00210415	0.00210415	0.00355197
GOTERM_CC_DIRECT	GO:0022625~cytosolic large ribosomal subunit	10	3.63636	3.33248e-06	6181, 9349, 6122, 6141, 25873, 6132, 6130, 6161, 6158, 6156	248	62	12453	8.09899	0.00114239	8.16425e-05	0.00454397
GOTERM_CC_DIRECT	GO:0031982~vesicle	12	4.36364	5.43176e-06	4282, 2950, 302, 8407, 966, 2597, 84790, 7086, 5315, 2783, 1072, 10409	248	102	12453	5.9075	0.00186137	0.000124199	0.00740634
GOTERM_MF_DIRECT	GO:0031625~ubiquitin protein ligase binding	19	6.90909	5.57674e-06	811, 3304, 1191, 3312, 3309, 9927, 5036, 10376, 7167, 8452, 8878, 203068, 7852, 71, 1152, 10155, 7009, 81502, 2821	241	260	11857	3.59532	0.00291795	0.000584273	0.00808335
GOTERM_BP_DIRECT	GO:0006928~movement of cell or subcellular component	10	3.63636	5.6811e-06	7431, 976, 10383, 10097, 10094, 203068, 396, 71, 60, 3315	242	64	11756	7.59039	0.0089923	0.00100316	0.00950545
GOTERM_CC_DIRECT	GO:0022627~cytosolic small ribosomal subunit	8	2.90909	6.8716e-06	6203, 6227, 6223, 6217, 6205, 3921, 6209, 6193	248	37	12453	10.857	0.00235419	0.000147299	0.0093695
GOTERM_MF_DIRECT	GO:0051082~unfolded protein binding	11	4	1.77518e-05	811, 3304, 10383, 10574, 3312, 3309, 3326, 22948, 7203, 10728, 821	241	93	11857	5.81926	0.0092589	0.00154914	0.0257287
UP_KEYWORDS	Chaperone	14	5.09091	2.06534e-05	811, 3304, 1191, 10574, 3476, 3312, 7203, 5034, 22948, 3326, 10728, 821, 3315, 29071	252	170	13285	4.3415	0.00588951	0.000738092	0.0273944
GOTERM_CC_DIRECT	GO:0005634~nucleus	116	42.1818	5.2476e-05	29123, 1191, 1107, 3006, 7296, 6209, 10409, 55544, 2950, 7167, 3921, 10155, 1327, 5036, 112939, 3856, 6156, 149603, 2023, 11331, 5935, 4691, 64324, 10728, 5216, 4609, 26986, 11083, 3219, 4779, 1434, 64710, 2316, 3312, 9361, 23633, 6185, 3315, 1072, 10016, 2597, 10949, 3399, 4946, 84790, 104, 103, 5763, 811, 6275, 10514, 226, 6277, 3838, 22907, 2305, 2778, 3326, 5052, 3015, 3017, 7916, 6203, 899, …	248	4298	12453	1.35523	0.0178387	0.00105825	0.0715311
UP_KEYWORDS	Cytoplasm	103	37.4545	6.25127e-05	1191, 3476, 1107, 7296, 55544, 2950, 1729, 8878, 3921, 415116, 5036, 112939, 3856, 10097, 10094, 149603, 2023, 5935, 11331, 4691, 7203, 10728, 5216, 26986, 11083, 79567, 1434, 826, 2316, 3312, 2783, 3315, 1072, 2597, 84790, 9168, 103, 145508, 3945, 10801, 811, 10514, 226, 3838, 6277, 22907, 8662, 54541, 3326, 5052, 7916, 6203, 5339, 7431, 899, 150094, 396, 203068, 10749, 2821, 5127, 6122, 1938, 1…	252	3882	13285	1.39876	0.0177203	0.0019846	0.082895
GOTERM_BP_DIRECT	GO:0061621~canonical glycolysis	6	2.18182	6.87632e-05	7167, 226, 2597, 2023, 5315, 2821	242	22	11756	13.2487	0.103572	0.0108742	0.114996
GOTERM_MF_DIRECT	GO:0003725~double-stranded RNA binding	8	2.90909	0.000100427	7431, 10383, 6520, 1665, 22907, 104, 3326, 10376	241	54	11857	7.28877	0.0512655	0.00748985	0.145473
UP_KEYWORDS	Citrullination	8	2.90909	0.000104508	10514, 6205, 3006, 8334, 8971, 10155, 8358, 8367	252	58	13285	7.27148	0.0294485	0.00298461	0.138547
UP_KEYWORDS	Glycolysis	6	2.18182	0.000109965	7167, 226, 2597, 2023, 5315, 2821	252	26	13285	12.1658	0.0309622	0.00285516	0.145777
GOTERM_CC_DIRECT	GO:0005730~nucleolus	32	11.6364	0.000143845	9349, 6122, 6141, 2316, 6205, 1029, 1107, 7296, 3312, 54663, 1665, 5307, 104, 103, 8971, 708, 123169, 10514, 6132, 6130, 6430, 80854, 22948, 5036, 5725, 6203, 25873, 6223, 64855, 5935, 4691, 4609	248	774	12453	2.07602	0.0481448	0.00273749	0.195965
GOTERM_BP_DIRECT	GO:0032873~negative regulation of stress-activated MAPK cascade	4	1.45455	0.00016258	2950, 3476, 2305, 4609	242	6	11756	32.3857	0.227809	0.0232281	0.271689
KEGG_PATHWAY	hsa05130:Pathogenic Escherichia coli infection	8	2.90909	0.000186847	10383, 10094, 203068, 84790, 71, 60, 4691, 10376	139	43	4809	6.43667	0.0366831	0.0185129	0.233941
UP_KEYWORDS	Host cell receptor for virus entry	7	2.54545	0.000213026	3304, 6510, 3916, 7852, 3921, 1605, 3383	252	46	13285	8.02234	0.0591127	0.00506479	0.282223
GOTERM_CC_DIRECT	GO:0000786~nucleosome	7	2.54545	0.000215068	3006, 8334, 8971, 8358, 3015, 8367, 3017	248	44	12453	7.98854	0.0711206	0.00387544	0.292863
GOTERM_MF_DIRECT	GO:0005200~structural constituent of cytoskeleton	9	3.27273	0.000225817	7431, 10383, 10097, 10094, 203068, 84790, 71, 60, 10376	241	81	11857	5.46657	0.111607	0.0146838	0.326831
KEGG_PATHWAY	hsa04145:Phagosome	12	4.36364	0.000232675	811, 10383, 3916, 203068, 3106, 84790, 71, 60, 29927, 821, 3105, 10376	139	108	4809	3.84412	0.045474	0.0153937	0.291243
GOTERM_CC_DIRECT	GO:0042383~sarcolemma	8	2.90909	0.000238245	5339, 302, 682, 966, 3916, 476, 1605, 3856	248	63	12453	6.37634	0.0784771	0.00407804	0.324375
KEGG_PATHWAY	hsa01230:Biosynthesis of amino acids	9	3.27273	0.00024188	5831, 445, 7167, 226, 2597, 26227, 7086, 2023, 5315	139	59	4809	5.27753	0.0472302	0.0120226	0.30275
GOTERM_BP_DIRECT	GO:0043066~negative regulation of apoptotic process	19	6.90909	0.000257607	415116, 966, 7001, 2316, 23770, 3309, 3315, 1603, 5036, 1072, 4282, 2950, 8878, 396, 11331, 64855, 103, 7009, 4609	242	344	11756	2.68312	0.336117	0.0335613	0.430168
GOTERM_BP_DIRECT	GO:0007050~cell cycle arrest	11	4	0.00027909	811, 1982, 55544, 8452, 10634, 1029, 5325, 9927, 389541, 4609, 5036	242	127	11756	4.20759	0.358416	0.0335634	0.465962
GOTERM_CC_DIRECT	GO:0071556~integral component of lumenal side of endoplasmic reticulum membrane	5	1.81818	0.000371285	811, 3106, 821, 3105, 81502	248	18	12453	13.9483	0.119596	0.00604708	0.505087
GOTERM_BP_DIRECT	GO:0061077~chaperone-mediated protein folding	6	2.18182	0.000444873	811, 1191, 10491, 23770, 60681, 821	242	32	11756	9.10847	0.507128	0.0492804	0.741782
GOTERM_BP_DIRECT	GO:0051726~regulation of cell cycle	10	3.63636	0.000452556	899, 5127, 80139, 6430, 3399, 10634, 104, 10399, 2305, 3312	242	111	11756	4.37644	0.513115	0.0468489	0.754548
GOTERM_MF_DIRECT	GO:0003723~RNA binding	22	8	0.000482992	6122, 6132, 6141, 6130, 6430, 6217, 8662, 6158, 6209, 51692, 6156, 5725, 1982, 10949, 10594, 3191, 104, 5935, 103, 4691, 6193, 26986	241	464	11857	2.33272	0.223648	0.0277358	0.697836
UP_SEQ_FEATURE	short sequence motif:Prevents secretion from ER	7	2.54545	0.000515289	811, 10439, 54732, 79709, 60681, 3309, 5034	250	54	13191	6.83978	0.380171	0.212708	0.80335
UP_KEYWORDS	Nitration	6	2.18182	0.000540291	7431, 7167, 84790, 1152, 3309, 10376	252	36	13285	8.78638	0.143212	0.0118192	0.714359
GOTERM_MF_DIRECT	GO:0001618~virus receptor activity	7	2.54545	0.00054297	3304, 6510, 3916, 7852, 3921, 1605, 3383	241	51	11857	6.75283	0.24768	0.0280582	0.784175
GOTERM_BP_DIRECT	GO:0071353~cellular response to interleukin-4	5	1.81818	0.000644457	2194, 6122, 3309, 3326, 10376	242	20	11756	12.1446	0.641209	0.0620546	1.07288
KEGG_PATHWAY	hsa05416:Viral myocarditis	7	2.54545	0.000860326	1982, 3106, 71, 60, 1605, 3105, 3383	139	40	4809	6.0545	0.158138	0.033842	1.073
GOTERM_CC_DIRECT	GO:0005783~endoplasmic reticulum	27	9.81818	0.000866541	54732, 1191, 5355, 6185, 821, 10016, 54972, 8878, 3106, 819, 3105, 646960, 811, 7837, 57142, 10491, 476, 3309, 5034, 445, 10439, 5770, 10749, 8985, 7009, 81502, 64834	248	673	12453	2.01452	0.257218	0.0134251	1.17514
GOTERM_CC_DIRECT	GO:0036464~cytoplasmic ribonucleoprotein granule	5	1.81818	0.000993883	203068, 60, 4691, 6158, 26986	248	23	12453	10.916	0.288992	0.0147198	1.34675
GOTERM_BP_DIRECT	GO:0006397~mRNA processing	11	4	0.00103664	55544, 1665, 9343, 10949, 6430, 3191, 10594, 104, 103, 708, 5725	242	150	11756	3.56242	0.80778	0.09245	1.72048
GOTERM_MF_DIRECT	GO:0001948~glycoprotein binding	7	2.54545	0.00108485	811, 7431, 2316, 10956, 3309, 3326, 821	241	58	11857	5.93783	0.433778	0.0503923	1.56106
UP_KEYWORDS	Host-virus interaction	17	6.18182	0.00113438	3838, 10399, 23770, 3312, 3159, 1605, 3856, 3383, 7431, 2192, 3916, 7852, 3106, 3921, 819, 708, 3105	252	354	13285	2.53167	0.277196	0.0229202	1.4944
GOTERM_CC_DIRECT	GO:0072562~blood microparticle	8	2.90909	0.00119067	3304, 1191, 5705, 71, 3312, 60, 5216, 3959	248	82	12453	4.8989	0.335448	0.0168826	1.6114
GOTERM_CC_DIRECT	GO:0009986~cell surface	18	6.54545	0.00132148	811, 506, 302, 6509, 1191, 966, 3326, 3309, 3383, 4282, 6520, 3106, 7852, 11331, 2022, 708, 81502, 3105	248	375	12453	2.41026	0.364643	0.0179791	1.78696
UP_KEYWORDS	Disease mutation	56	20.3636	0.00140617	29123, 9289, 9343, 1938, 9927, 4000, 7167, 8878, 6566, 26227, 3921, 81, 7837, 6509, 55699, 60681, 5034, 22948, 3856, 400916, 5831, 445, 6223, 8452, 71, 2022, 8985, 64324, 2512, 5216, 29071, 966, 2316, 1029, 1605, 9361, 3315, 5518, 5654, 5307, 103, 60, 3945, 10801, 646960, 226, 10491, 2778, 5339, 7431, 203068, 10594, 396, 150094, 10749, 2821	252	1961	13285	1.50547	0.331318	0.0264731	1.84937
GOTERM_BP_DIRECT	GO:0009615~response to virus	8	2.90909	0.00154149	1191, 7852, 2023, 3159, 103, 22948, 3315, 1072	242	83	11756	4.68227	0.913953	0.127393	2.54826
GOTERM_BP_DIRECT	GO:0051290~protein heterotetramerization	5	1.81818	0.00155267	302, 6241, 6281, 8358, 8367	242	25	11756	9.7157	0.915471	0.121935	2.5665
GOTERM_BP_DIRECT	GO:0000028~ribosomal small subunit assembly	4	1.45455	0.00163229	6223, 3921, 6209, 6193	242	12	11756	16.1928	0.925537	0.121793	2.69643
GOTERM_CC_DIRECT	GO:0005654~nucleoplasm	71	25.8182	0.00168935	29123, 6122, 9343, 10951, 1107, 6205, 7296, 6209, 4000, 1051, 28973, 3191, 8878, 5325, 3921, 10155, 8367, 3304, 5709, 6217, 5705, 23367, 5036, 3856, 6223, 8452, 6050, 149603, 5935, 2022, 4691, 64324, 8358, 10728, 6193, 11047, 4609, 3219, 1434, 6241, 1029, 3312, 9361, 1605, 23633, 51692, 54434, 10949, 3399, 7086, 104, 103, 60, 123169, 10514, 3838, 6430, 8662, 2305, 3159, 80854, 3326, 3017, 5725, 4…	248	2544	12453	1.4014	0.440066	0.0220583	2.27912
GOTERM_BP_DIRECT	GO:0097421~liver regeneration	5	1.81818	0.00180576	1051, 6430, 6161, 6217, 4609	242	26	11756	9.34202	0.943514	0.127895	2.97895
KEGG_PATHWAY	hsa04612:Antigen processing and presentation	7	2.54545	0.00182323	811, 3304, 3106, 3312, 3326, 821, 3105	139	46	4809	5.26478	0.305789	0.0590166	2.26136
GOTERM_MF_DIRECT	GO:0003924~GTPase activity	12	4.36364	0.00215228	10383, 9343, 375, 1938, 2935, 203068, 84790, 2778, 2783, 9927, 10801, 10376	241	196	11857	3.01219	0.676647	0.0897939	3.07489
BIOCARTA	h_glycolysisPathway:Glycolysis Pathway	4	1.45455	0.00218516	7167, 2597, 2023, 2821	43	9	1324	13.6848	0.182296	0.182296	2.36153
GOTERM_CC_DIRECT	GO:0005856~cytoskeleton	15	5.45455	0.00229172	6624, 1605, 3315, 54434, 10409, 7431, 5339, 10383, 203068, 10634, 396, 71, 60, 7203, 5216	248	295	12453	2.55324	0.544774	0.0287261	3.08008
GOTERM_MF_DIRECT	GO:0043022~ribosome binding	6	2.18182	0.00250009	28972, 1938, 3921, 3309, 6185, 29927	241	47	11857	6.28075	0.730635	0.0959756	3.56345
KEGG_PATHWAY	hsa00010:Glycolysis / Gluconeogenesis	7	2.54545	0.0025369	7167, 226, 2597, 2023, 5315, 3945, 2821	139	49	4809	4.94245	0.398317	0.070004	3.13363
GOTERM_BP_DIRECT	GO:0006865~amino acid transport	5	1.81818	0.00273417	6520, 6510, 6509, 8140, 4609	242	29	11756	8.37561	0.987136	0.179529	4.47785
GOTERM_BP_DIRECT	GO:0006096~glycolytic process	5	1.81818	0.00273417	7167, 226, 2597, 2023, 2821	242	29	11756	8.37561	0.987136	0.179529	4.47785
GOTERM_BP_DIRECT	GO:0050900~leukocyte migration	8	2.90909	0.0029607	9123, 4282, 6520, 682, 2683, 6566, 8140, 3383	242	93	11756	4.1788	0.991036	0.185335	4.84026
GOTERM_CC_DIRECT	GO:0044297~cell body	6	2.18182	0.00301766	10574, 203068, 22948, 7203, 6158, 2783	248	50	12453	6.02565	0.64535	0.0363453	4.03726
UP_SEQ_FEATURE	site:Not acetylated	4	1.45455	0.00310235	9123, 6223, 2597, 6217	250	16	13191	13.191	0.944059	0.617547	4.74614
UP_KEYWORDS	Oxidation	4	1.45455	0.00311046	2597, 5770, 71, 60	252	16	13285	13.1796	0.589745	0.054164	4.04841
GOTERM_BP_DIRECT	GO:0006457~protein folding	10	3.63636	0.00341841	811, 10574, 23770, 60681, 3312, 3326, 22948, 7203, 2783, 821	242	148	11756	3.28233	0.99568	0.202966	5.56859
INTERPRO	IPR018316:Tubulin/FtsZ, 2-layer sandwich domain	4	1.45455	0.0034389	10383, 203068, 84790, 10376	246	16	12512	12.7154	0.898116	0.898116	5.02651
SMART	SM00865:SM00865	4	1.45455	0.00344853	10383, 203068, 84790, 10376	137	16	6919	12.6259	0.396105	0.396105	4.02279
GOTERM_BP_DIRECT	GO:0000302~response to reactive oxygen species	5	1.81818	0.00350815	2950, 7001, 7296, 5034, 5052	242	31	11756	7.83524	0.996257	0.200294	5.71077
GOTERM_CC_DIRECT	GO:0016234~inclusion body	4	1.45455	0.00356568	3304, 8878, 5705, 3326	248	16	12453	12.5534	0.706306	0.0413688	4.75403
UP_KEYWORDS	Nucleosome core	5	1.81818	0.00411145	8334, 8358, 3015, 8367, 3017	252	35	13285	7.53118	0.692198	0.0669641	5.31866
INTERPRO	IPR023123:Tubulin, C-terminal	4	1.45455	0.00411596	10383, 203068, 84790, 10376	246	17	12512	11.9675	0.935074	0.745195	5.98794
INTERPRO	IPR008280:Tubulin/FtsZ, C-terminal	4	1.45455	0.00411596	10383, 203068, 84790, 10376	246	17	12512	11.9675	0.935074	0.745195	5.98794
INTERPRO	IPR017975:Tubulin, conserved site	4	1.45455	0.00411596	10383, 203068, 84790, 10376	246	17	12512	11.9675	0.935074	0.745195	5.98794
KEGG_PATHWAY	hsa04141:Protein processing in endoplasmic reticulum	12	4.36364	0.00461686	811, 3304, 6184, 10956, 3312, 3309, 3326, 5034, 6185, 29927, 821, 1603	139	155	4809	2.67849	0.603671	0.109248	5.63516
GOTERM_BP_DIRECT	GO:0030705~cytoskeleton-dependent intracellular transport	4	1.45455	0.00467747	203068, 84790, 10749, 10376	242	17	11756	11.4302	0.999421	0.249275	7.54509
GOTERM_BP_DIRECT	GO:0007339~binding of sperm to zona pellucida	4	1.45455	0.00467747	10574, 2683, 22948, 7203	242	17	11756	11.4302	0.999421	0.249275	7.54509
INTERPRO	IPR000217:Tubulin	4	1.45455	0.00486843	10383, 203068, 84790, 10376	246	18	12512	11.3026	0.960665	0.659912	7.04578
SMART	SM00864:SM00864	4	1.45455	0.0048828	10383, 203068, 84790, 10376	137	18	6919	11.223	0.510629	0.30045	5.65181
GOTERM_BP_DIRECT	GO:0070527~platelet aggregation	5	1.81818	0.0049288	2316, 71, 2778, 60, 3315	242	34	11756	7.1439	0.999613	0.252461	7.93495
GOTERM_MF_DIRECT	GO:0051015~actin filament binding	8	2.90909	0.00513502	84962, 10097, 6624, 1938, 10094, 2316, 81, 1072	241	104	11857	3.78455	0.932638	0.175264	7.1909
KEGG_PATHWAY	hsa01130:Biosynthesis of antibiotics	13	4.72727	0.00541277	226, 5831, 4833, 445, 7167, 2597, 10606, 26227, 7086, 2023, 5315, 3945, 2821	139	181	4809	2.48488	0.662265	0.113621	6.57654
GOTERM_BP_DIRECT	GO:0006094~gluconeogenesis	5	1.81818	0.00547675	7167, 226, 2597, 2023, 2821	242	35	11756	6.93979	0.999839	0.267913	8.77957
GOTERM_BP_DIRECT	GO:0006090~pyruvate metabolic process	4	1.45455	0.00552889	9123, 682, 6566, 3945	242	18	11756	10.7952	0.999852	0.262122	8.85956
GOTERM_BP_DIRECT	GO:0045892~negative regulation of transcription, DNA-templated	18	6.54545	0.00559669	811, 10514, 10951, 5705, 1029, 2305, 3312, 3159, 5036, 112939, 10409, 1051, 80139, 3399, 5307, 2023, 11331, 10155	242	418	11756	2.0919	0.999867	0.257296	8.96347
UP_KEYWORDS	RNA-binding	21	7.63636	0.00559699	302, 6132, 6430, 22907, 8662, 6205, 23367, 5036, 51692, 5725, 6203, 55544, 10949, 10594, 3191, 4150, 104, 5935, 103, 4691, 26986	252	568	13285	1.94909	0.799158	0.0853189	7.17517
INTERPRO	IPR003008:Tubulin/FtsZ, GTPase domain	4	1.45455	0.00569856	10383, 203068, 84790, 10376	246	19	12512	10.7077	0.977381	0.612189	8.19992
INTERPRO	IPR020568:Ribosomal protein S5 domain 2-type fold	5	1.81818	0.00570533	9343, 1938, 6217, 3326, 9361	246	37	12512	6.87321	0.977483	0.531722	8.20928
GOTERM_CC_DIRECT	GO:0005791~rough endoplasmic reticulum	5	1.81818	0.00596803	6184, 6185, 29927, 821, 81502	248	37	12453	6.78564	0.871672	0.0661495	7.83798
UP_SEQ_FEATURE	nucleotide phosphate-binding region:GTP	12	4.36364	0.00732775	10383, 9343, 375, 1938, 2935, 171177, 203068, 84790, 2778, 9927, 10801, 10376	250	247	13191	2.56343	0.998914	0.818463	10.8719
GOTERM_BP_DIRECT	GO:0006986~response to unfolded protein	5	1.81818	0.00807263	3312, 3326, 9927, 7009, 3315	242	39	11756	6.22801	0.999997	0.34014	12.6828
UP_KEYWORDS	Actin-binding	11	4	0.00808171	5339, 1729, 10097, 6624, 10094, 2316, 9168, 81, 5216, 54434, 1072	252	216	13285	2.68473	0.901801	0.11498	10.2053
GOTERM_BP_DIRECT	GO:0001895~retina homeostasis	4	1.45455	0.00861347	71, 60, 5052, 3315	242	21	11756	9.25305	0.999999	0.349384	13.476
GOTERM_CC_DIRECT	GO:0005739~mitochondrion	36	13.0909	0.0087573	3219, 682, 1191, 1029, 7296, 10399, 9361, 9927, 28973, 2950, 2194, 5518, 6566, 1152, 708, 3945, 3304, 401505, 506, 55699, 22907, 1327, 51116, 7407, 3309, 54541, 5052, 3326, 4722, 400916, 4833, 5831, 10574, 11331, 5315, 4609	248	1168	12453	1.54768	0.951051	0.0927362	11.3024
UP_KEYWORDS	Hereditary hemolytic anemia	4	1.45455	0.00892506	7167, 226, 966, 2821	252	23	13285	9.16839	0.923006	0.120324	11.2128
GOTERM_BP_DIRECT	GO:0046718~viral entry into host cell	6	2.18182	0.0092952	3304, 6510, 3916, 3921, 1605, 3383	242	63	11756	4.62652	1	0.362342	14.4662
UP_KEYWORDS	Isomerase	7	2.54545	0.00965462	4282, 7167, 23770, 60681, 5034, 10728, 2821	252	96	13285	3.84404	0.937628	0.123769	12.0759
INTERPRO	IPR014721:Ribosomal protein S5 domain 2-type fold, subgroup	4	1.45455	0.00983317	9343, 1938, 6217, 9361	246	23	12512	8.84553	0.998572	0.664436	13.7518
INTERPRO	IPR002194:Chaperonin TCP-1, conserved site	3	1.09091	0.0098916	10574, 22948, 7203	246	8	12512	19.0732	0.998627	0.609973	13.8279
GOTERM_CC_DIRECT	GO:0005832~chaperonin-containing T-complex	3	1.09091	0.0101393	10574, 22948, 7203	248	8	12453	18.8301	0.969667	0.10348	12.9739
GOTERM_CC_DIRECT	GO:0002199~zona pellucida receptor complex	3	1.09091	0.0101393	10574, 22948, 7203	248	8	12453	18.8301	0.969667	0.10348	12.9739
BIOCARTA	h_rhoPathway:Rho cell motility signaling pathway	5	1.81818	0.0103063	1729, 10097, 10094, 5216, 1072	43	28	1324	5.49834	0.614457	0.379079	10.7009
GOTERM_BP_DIRECT	GO:0045471~response to ethanol	6	2.18182	0.0105705	2950, 1938, 80854, 4609, 3383, 51150	242	65	11756	4.48417	1	0.39162	16.29
GOTERM_BP_DIRECT	GO:1904871~positive regulation of protein localization to Cajal body	3	1.09091	0.0108016	10574, 22948, 7203	242	8	11756	18.2169	1	0.389435	16.6166
GOTERM_CC_DIRECT	GO:0015629~actin cytoskeleton	10	3.63636	0.0111564	9123, 10097, 226, 6624, 10094, 2316, 64855, 81, 10801, 1072	248	184	12453	2.72901	0.978681	0.110069	14.1854
GOTERM_CC_DIRECT	GO:0031941~filamentous actin	4	1.45455	0.0114693	6624, 2316, 9168, 71	248	24	12453	8.36895	0.980874	0.109858	14.5549
UP_KEYWORDS	Nucleotide-binding	41	14.9091	0.0120731	5127, 9343, 1938, 2935, 1107, 3312, 9361, 9927, 10383, 1665, 171177, 84790, 1152, 60, 10801, 3304, 506, 415116, 55699, 5705, 22907, 476, 7407, 2778, 3309, 3326, 22948, 10376, 4833, 445, 10097, 375, 10606, 10574, 203068, 150094, 10749, 71, 5315, 3068, 7203	252	1477	13285	1.4634	0.969004	0.146069	14.8819
UP_SEQ_FEATURE	calcium-binding region:2	6	2.18182	0.0122069	10016, 826, 6277, 60681, 81, 51150	250	73	13191	4.33677	0.999989	0.897669	17.4861
GOTERM_BP_DIRECT	GO:0045727~positive regulation of translation	5	1.81818	0.0123075	1982, 1938, 23367, 5935, 26986	242	44	11756	5.52029	1	0.42129	18.7153
GOTERM_BP_DIRECT	GO:0048146~positive regulation of fibroblast proliferation	5	1.81818	0.0123075	4282, 2192, 302, 6277, 4609	242	44	11756	5.52029	1	0.42129	18.7153
INTERPRO	IPR009000:Translation elongation/initiation factor/Ribosomal, beta-barrel	4	1.45455	0.0124096	6122, 9343, 1938, 2935	246	25	12512	8.13789	0.999746	0.644731	17.0511
GOTERM_CC_DIRECT	GO:0005623~cell	6	2.18182	0.012535	10439, 7001, 7296, 5034, 5052, 2512	248	70	12453	4.30403	0.986789	0.116284	15.8024
INTERPRO	IPR017998:Chaperone tailless complex polypeptide 1 (TCP-1)	3	1.09091	0.0125547	10574, 22948, 7203	246	9	12512	16.9539	0.99977	0.605728	17.2334
INTERPRO	IPR001751:S100/Calbindin-D9k, conserved site	3	1.09091	0.0125547	6275, 6277, 6281	246	9	12512	16.9539	0.99977	0.605728	17.2334
INTERPRO	IPR027410:TCP-1-like chaperonin intermediate domain	3	1.09091	0.0125547	10574, 22948, 7203	246	9	12512	16.9539	0.99977	0.605728	17.2334
GOTERM_MF_DIRECT	GO:0015175~neutral amino acid transmembrane transporter activity	3	1.09091	0.0133733	6520, 6510, 8140	241	9	11857	16.3997	0.999137	0.375202	17.7296
GOTERM_MF_DIRECT	GO:0004579~dolichyl-diphosphooligosaccharide-protein glycotransferase activity	3	1.09091	0.0133733	6184, 6185, 1603	241	9	11857	16.3997	0.999137	0.375202	17.7296
GOTERM_BP_DIRECT	GO:0032355~response to estradiol	6	2.18182	0.01347	811, 445, 2950, 1938, 4609, 2821	242	69	11756	4.22422	1	0.441656	20.3014
GOTERM_BP_DIRECT	GO:0015718~monocarboxylic acid transport	3	1.09091	0.0137014	9123, 682, 6566	242	9	11756	16.1928	1	0.438565	20.6136
GOTERM_BP_DIRECT	GO:0006754~ATP biosynthetic process	4	1.45455	0.0140278	506, 226, 5315, 400916	242	25	11756	7.77256	1	0.43783	21.052
GOTERM_BP_DIRECT	GO:0045070~positive regulation of viral genome replication	4	1.45455	0.0140278	104, 23367, 103, 26986	242	25	11756	7.77256	1	0.43783	21.052
COG_ONTOLOGY	Translation, ribosomal structure and biogenesis	5	1.81818	0.0141968	6141, 9343, 1938, 2935, 51692	25	66	1628	4.93333	0.169627	0.169627	9.03223
GOTERM_BP_DIRECT	GO:0021762~substantia nigra development	5	1.81818	0.0143339	1152, 60, 3309, 4722, 10409	242	46	11756	5.28027	1	0.436672	21.4611
UP_SEQ_FEATURE	domain:EF-hand 2	7	2.54545	0.0151591	6275, 10016, 826, 6277, 60681, 81, 51150	250	106	13191	3.48442	0.999999	0.905821	21.262
INTERPRO	IPR013787:S100/CaBP-9k-type, calcium binding, subdomain	3	1.09091	0.0154924	6275, 6277, 6281	246	10	12512	15.2585	0.999968	0.644839	20.8441
SMART	SM01394:SM01394	3	1.09091	0.0155648	6275, 6277, 6281	137	10	6919	15.1511	0.898766	0.53394	17.0104
GOTERM_CC_DIRECT	GO:0008250~oligosaccharyltransferase complex	3	1.09091	0.015875	6184, 6185, 1603	248	10	12453	15.0641	0.995867	0.141413	19.6038
UP_SEQ_FEATURE	calcium-binding region:1	6	2.18182	0.0167341	10016, 826, 6277, 60681, 81, 51150	250	79	13191	4.00739	1	0.893246	23.2096
GOTERM_BP_DIRECT	GO:0030308~negative regulation of cell growth	7	2.54545	0.0167979	57142, 5518, 10634, 1029, 2023, 10399, 4722	242	100	11756	3.4005	1	0.481577	24.6824
GOTERM_BP_DIRECT	GO:0042267~natural killer cell mediated cytotoxicity	3	1.09091	0.0168973	10383, 203068, 5052	242	10	11756	14.5736	1	0.475416	24.8098
UP_KEYWORDS	GTP-binding	12	4.36364	0.0170905	10383, 9343, 375, 1938, 2935, 171177, 203068, 84790, 2778, 9927, 10801, 10376	252	279	13285	2.26745	0.992775	0.192938	20.4414
GOTERM_BP_DIRECT	GO:0022617~extracellular matrix disassembly	5	1.81818	0.0177496	682, 826, 5654, 3915, 2022	242	49	11756	4.95699	1	0.484293	25.8931
SMART	SM00360:RRM	9	3.27273	0.0179357	55544, 10949, 6430, 3191, 8662, 5935, 4691, 26986, 5725	137	169	6919	2.68954	0.928808	0.483455	19.3551
INTERPRO	IPR018247:EF-Hand 1, calcium-binding site	7	2.54545	0.0185774	6275, 10016, 826, 6277, 60681, 81, 51150	246	107	12512	3.32741	0.999996	0.677045	24.4773
GOTERM_BP_DIRECT	GO:0007017~microtubule-based process	4	1.45455	0.0191042	10383, 203068, 84790, 10376	242	28	11756	6.93979	1	0.50194	27.5847
UP_KEYWORDS	Endoplasmic reticulum	26	9.45455	0.019462	6184, 4779, 54732, 1191, 79709, 10956, 6185, 821, 1603, 10016, 28972, 54972, 8878, 811, 57142, 60681, 3309, 5034, 10439, 5770, 51435, 8985, 29927, 7009, 81502, 64834	252	854	13285	1.60501	0.996379	0.208803	22.9504
GOTERM_MF_DIRECT	GO:0008028~monocarboxylic acid transmembrane transporter activity	3	1.09091	0.0198949	9123, 682, 6566	241	11	11857	13.418	0.999973	0.482179	25.2701
UP_KEYWORDS	Cytoskeleton	28	10.1818	0.0199899	6624, 2316, 1107, 1605, 22948, 3315, 54434, 10376, 1072, 5339, 84962, 10383, 899, 1729, 10097, 2597, 10094, 203068, 10634, 84790, 10749, 9168, 71, 145508, 60, 10801, 5216, 11083	252	943	13285	1.56534	0.996896	0.206261	23.4988
GOTERM_BP_DIRECT	GO:0042744~hydrogen peroxide catabolic process	3	1.09091	0.020376	7837, 7001, 5052	242	11	11756	13.2487	1	0.516832	29.1399
GOTERM_BP_DIRECT	GO:0015804~neutral amino acid transport	3	1.09091	0.020376	6520, 6510, 8140	242	11	11756	13.2487	1	0.516832	29.1399
UP_SEQ_FEATURE	repeat:1-4	3	1.09091	0.020677	811, 7916, 821	250	12	13191	13.191	1	0.911405	27.8895
UP_SEQ_FEATURE	domain:EF-hand 5	3	1.09091	0.020677	10016, 826, 51150	250	12	13191	13.191	1	0.911405	27.8895
GOTERM_BP_DIRECT	GO:0002474~antigen processing and presentation of peptide antigen via MHC class I	4	1.45455	0.020993	811, 3106, 821, 3105	242	29	11756	6.70048	1	0.519704	29.883
GOTERM_BP_DIRECT	GO:0045429~positive regulation of nitric oxide biosynthetic process	4	1.45455	0.020993	445, 1191, 3326, 3383	242	29	11756	6.70048	1	0.519704	29.883
GOTERM_BP_DIRECT	GO:0006606~protein import into nucleus	5	1.81818	0.0216324	1434, 3838, 103, 23633, 1072	242	52	11756	4.67101	1	0.522815	30.6453
GOTERM_BP_DIRECT	GO:0036498~IRE1-mediated unfolded protein response	5	1.81818	0.0216324	5770, 3068, 3309, 29927, 4000	242	52	11756	4.67101	1	0.522815	30.6453
INTERPRO	IPR011991:Winged helix-turn-helix DNA-binding domain	9	3.27273	0.0219061	5709, 6223, 8452, 3006, 2305, 23367, 103, 8971, 5036	246	175	12512	2.61575	1	0.705879	28.2226
INTERPRO	IPR020902:Actin/actin-like conserved site	3	1.09091	0.0221454	10097, 71, 60	246	12	12512	12.7154	1	0.680854	28.485
INTERPRO	IPR027413:GroEL-like equatorial domain	3	1.09091	0.0221454	10574, 22948, 7203	246	12	12512	12.7154	1	0.680854	28.485
GOTERM_BP_DIRECT	GO:1900026~positive regulation of substrate adhesion-dependent cell spreading	4	1.45455	0.0229806	811, 2316, 6281, 708	242	30	11756	6.47713	1	0.537041	32.2272
GOTERM_MF_DIRECT	GO:0023026~MHC class II protein complex binding	3	1.09091	0.0235591	5315, 3312, 3326	241	12	11857	12.2998	0.999996	0.52043	29.2193
GOTERM_MF_DIRECT	GO:0044183~protein binding involved in protein folding	3	1.09091	0.0235591	811, 3304, 7203	241	12	11857	12.2998	0.999996	0.52043	29.2193
GOTERM_MF_DIRECT	GO:0042974~retinoic acid receptor binding	3	1.09091	0.0235591	3159, 81, 64324	241	12	11857	12.2998	0.999996	0.52043	29.2193
GOTERM_BP_DIRECT	GO:0034329~cell junction assembly	3	1.09091	0.0241248	2316, 71, 60	242	12	11756	12.1446	1	0.547253	33.5431
GOTERM_BP_DIRECT	GO:0034975~protein folding in endoplasmic reticulum	3	1.09091	0.0241248	811, 3309, 821	242	12	11756	12.1446	1	0.547253	33.5431
UP_SEQ_FEATURE	domain:RRM 4	3	1.09091	0.0241361	4691, 26986, 5725	250	13	13191	12.1763	1	0.919478	31.7739
UP_SEQ_FEATURE	repeat:1-3	3	1.09091	0.0241361	811, 7916, 821	250	13	13191	12.1763	1	0.919478	31.7739
GOTERM_MF_DIRECT	GO:0005525~GTP binding	13	4.72727	0.0245543	9343, 1938, 2935, 2778, 3326, 9927, 10376, 10383, 375, 171177, 203068, 84790, 10801	241	311	11857	2.05656	0.999998	0.515058	30.2579
INTERPRO	IPR000504:RNA recognition motif domain	9	3.27273	0.0246806	55544, 10949, 6430, 3191, 8662, 5935, 4691, 26986, 5725	246	179	12512	2.5573	1	0.693785	31.2112
GOTERM_MF_DIRECT	GO:0042802~identical protein binding	21	7.63636	0.0248457	6275, 6723, 226, 23770, 5052, 3315, 5831, 7431, 445, 2192, 10016, 2597, 10606, 10574, 8878, 71, 60, 4691, 2512, 3945, 51150	241	614	11857	1.68271	0.999998	0.500364	30.5593
GOTERM_CC_DIRECT	GO:0005882~intermediate filament	4	1.45455	0.0250378	7431, 6509, 4000, 3856	248	32	12453	6.27671	0.999833	0.209479	29.2314
GOTERM_BP_DIRECT	GO:1901998~toxin transport	4	1.45455	0.025067	10574, 3309, 22948, 7203	242	31	11756	6.2682	1	0.553935	34.6085
KEGG_PATHWAY	hsa01200:Carbon metabolism	8	2.90909	0.0251956	7167, 226, 2597, 26227, 7086, 2023, 5315, 2821	139	101	4809	2.74037	0.993926	0.399725	27.374
UP_KEYWORDS	mRNA processing	12	4.36364	0.0252026	55544, 1665, 9343, 6430, 10594, 104, 3312, 103, 708, 51692, 26986, 5725	252	296	13285	2.13723	0.999325	0.244807	28.7241
UP_KEYWORDS	Stress response	6	2.18182	0.0255051	5831, 3304, 3312, 5935, 3326, 3315	252	88	13285	3.59443	0.999382	0.239417	29.017
INTERPRO	IPR004161:Translation elongation factor EFTu/EF1A, domain 2	3	1.09091	0.0258383	9343, 1938, 2935	246	13	12512	11.7373	1	0.685593	32.4235
INTERPRO	IPR002423:Chaperonin Cpn60/TCP-1	3	1.09091	0.0258383	10574, 22948, 7203	246	13	12512	11.7373	1	0.685593	32.4235
INTERPRO	IPR027409:GroEL-like apical domain	3	1.09091	0.0258383	10574, 22948, 7203	246	13	12512	11.7373	1	0.685593	32.4235
GOTERM_BP_DIRECT	GO:0034599~cellular response to oxidative stress	5	1.81818	0.0259968	5831, 3304, 4779, 7001, 9361	242	55	11756	4.41623	1	0.560101	35.6443
UP_SEQ_FEATURE	domain:RRM 2	6	2.18182	0.0265288	10949, 6430, 3191, 4691, 26986, 5725	250	89	13191	3.55712	1	0.917513	34.3452
UP_SEQ_FEATURE	domain:RRM 1	6	2.18182	0.0265288	10949, 6430, 3191, 4691, 26986, 5725	250	89	13191	3.55712	1	0.917513	34.3452
SMART	SM00054:EFh	6	2.18182	0.0267	6275, 10016, 6277, 60681, 81, 51150	137	86	6919	3.52351	0.980768	0.546263	27.5059
SMART	SM00033:CH	5	1.81818	0.0267471	5339, 8407, 2316, 10634, 81	137	58	6919	4.35376	0.980904	0.482998	27.5476
GOTERM_BP_DIRECT	GO:0006450~regulation of translational fidelity	3	1.09091	0.0281311	55699, 7407, 6193	242	13	11756	11.2104	1	0.582092	37.9637
INTERPRO	IPR009072:Histone-fold	5	1.81818	0.0282041	8334, 8358, 3015, 8367, 3017	246	59	12512	4.31032	1	0.694408	34.8392
GOTERM_BP_DIRECT	GO:0000398~mRNA splicing, via spliceosome	10	3.63636	0.0282132	1665, 9343, 10949, 6430, 3191, 10594, 3312, 51692, 26986, 5725	242	209	11756	2.32433	1	0.57623	38.0513
INTERPRO	IPR007125:Histone core	4	1.45455	0.0284009	8334, 8358, 3015, 3017	246	34	12512	5.98374	1	0.674915	35.0364
GOTERM_MF_DIRECT	GO:0015293~symporter activity	4	1.45455	0.0285908	9123, 6510, 6509, 6566	241	33	11857	5.96354	1	0.532331	34.3263
GOTERM_CC_DIRECT	GO:0005788~endoplasmic reticulum lumen	8	2.90909	0.0289925	811, 79709, 10491, 10956, 60681, 3309, 5034, 821	248	149	12453	2.69604	0.999959	0.233226	33.0468
INTERPRO	IPR013126:Heat shock protein 70 family	3	1.09091	0.0297612	3304, 3312, 3309	246	14	12512	10.899	1	0.671378	36.3849
INTERPRO	IPR018181:Heat shock protein 70, conserved site	3	1.09091	0.0297612	3304, 3312, 3309	246	14	12512	10.899	1	0.671378	36.3849
GOTERM_CC_DIRECT	GO:0005874~microtubule	11	4	0.0310156	10383, 10574, 203068, 10634, 84790, 3476, 10749, 22948, 7203, 10801, 10376	248	255	12453	2.16608	0.99998	0.242019	34.9241
GOTERM_MF_DIRECT	GO:0003779~actin binding	10	3.63636	0.031018	5339, 6275, 1729, 226, 6624, 7852, 81, 1605, 5216, 54434	241	215	11857	2.28833	1	0.544441	36.6653
GOTERM_BP_DIRECT	GO:0006275~regulation of DNA replication	3	1.09091	0.032383	64710, 5518, 3399	242	14	11756	10.4097	1	0.620643	42.352
GOTERM_BP_DIRECT	GO:0001649~osteoblast differentiation	6	2.18182	0.0330371	506, 10514, 2194, 6205, 103, 6209	242	87	11756	3.35024	1	0.621373	43.0006
GOTERM_MF_DIRECT	GO:0005198~structural molecule activity	7	2.54545	0.033822	7431, 203068, 84790, 51435, 4000, 10376, 3856	241	119	11857	2.89407	1	0.559355	39.2707
UP_SEQ_FEATURE	region of interest:Coil 2	3	1.09091	0.0357841	7431, 4000, 3856	250	16	13191	9.89325	1	0.953774	43.4621
UP_KEYWORDS	Peroxidase	3	1.09091	0.0358437	7837, 7001, 5052	252	16	13285	9.88467	0.999971	0.311225	38.3822
GOTERM_MF_DIRECT	GO:0042288~MHC class I protein binding	3	1.09091	0.0360222	506, 10383, 203068	241	15	11857	9.83983	1	0.566484	41.2448
GOTERM_BP_DIRECT	GO:0030334~regulation of cell migration	5	1.81818	0.0362098	84962, 57142, 2316, 7852, 4000	242	61	11756	3.98185	1	0.649072	46.0504
KEGG_PATHWAY	hsa05110:Vibrio cholerae infection	5	1.81818	0.03632	375, 71, 2778, 60, 29927	139	44	4809	3.93149	0.999388	0.489648	37.1052
GOTERM_BP_DIRECT	GO:1904874~positive regulation of telomerase RNA localization to Cajal body	3	1.09091	0.0368687	10574, 22948, 7203	242	15	11756	9.7157	1	0.64932	46.6643
GOTERM_BP_DIRECT	GO:1902236~negative regulation of endoplasmic reticulum stress-induced intrinsic apoptotic signaling pathway	3	1.09091	0.0368687	3304, 5770, 7009	242	15	11756	9.7157	1	0.64932	46.6643
GOTERM_BP_DIRECT	GO:0042274~ribosomal small subunit biogenesis	3	1.09091	0.0368687	6223, 6217, 6209	242	15	11756	9.7157	1	0.64932	46.6643
KEGG_PATHWAY	hsa05322:Systemic lupus erythematosus	6	2.18182	0.0377906	8334, 81, 8358, 3015, 8367, 3017	139	65	4809	3.19358	0.999549	0.473789	38.2977
GOTERM_BP_DIRECT	GO:0038096~Fc-gamma receptor signaling pathway involved in phagocytosis	5	1.81818	0.0381071	10097, 10094, 71, 60, 3326	242	62	11756	3.91762	1	0.655301	47.8002
GOTERM_MF_DIRECT	GO:0019843~rRNA binding	4	1.45455	0.0384028	6203, 6132, 6205, 6193	241	37	11857	5.31883	1	0.574711	43.3134
INTERPRO	IPR023591:Ribosomal protein S2, flavodoxin-like domain	2	0.727273	0.0387805	51116, 3921	246	2	12512	50.8618	1	0.748465	44.6857
INTERPRO	IPR001865:Ribosomal protein S2	2	0.727273	0.0387805	51116, 3921	246	2	12512	50.8618	1	0.748465	44.6857
INTERPRO	IPR018130:Ribosomal protein S2, conserved site	2	0.727273	0.0387805	51116, 3921	246	2	12512	50.8618	1	0.748465	44.6857
GOTERM_CC_DIRECT	GO:0030176~integral component of endoplasmic reticulum membrane	6	2.18182	0.0389654	57142, 28972, 23770, 3309, 29927, 64834	248	94	12453	3.20513	0.999999	0.288807	41.8386
GOTERM_CC_DIRECT	GO:0030863~cortical cytoskeleton	3	1.09091	0.0391619	2316, 81, 60	248	16	12453	9.41507	0.999999	0.284097	42.0006
UP_SEQ_FEATURE	domain:Actin-binding	3	1.09091	0.04006	5339, 2316, 81	250	17	13191	9.31129	1	0.957648	47.2607
UP_SEQ_FEATURE	repeat:2-1	3	1.09091	0.04006	811, 7916, 821	250	17	13191	9.31129	1	0.957648	47.2607
GOTERM_MF_DIRECT	GO:0003726~double-stranded RNA adenosine deaminase activity	2	0.727273	0.0400744	104, 103	241	2	11857	49.1992	1	0.575674	44.7251
UP_KEYWORDS	Osteogenesis imperfecta	3	1.09091	0.0401263	10491, 60681, 5034	252	17	13285	9.30322	0.999992	0.33228	41.9156
INTERPRO	IPR001715:Calponin homology domain	5	1.81818	0.0402286	5339, 8407, 2316, 10634, 81	246	66	12512	3.85317	1	0.743633	45.9203
GOTERM_BP_DIRECT	GO:0021801~cerebral cortex radial glia guided migration	2	0.727273	0.0405818	9289, 57142	242	2	11756	48.5785	1	0.672562	50.0024
GOTERM_BP_DIRECT	GO:0046166~glyceraldehyde-3-phosphate biosynthetic process	2	0.727273	0.0405818	7167, 7086	242	2	11756	48.5785	1	0.672562	50.0024
GOTERM_BP_DIRECT	GO:0044346~fibroblast apoptotic process	2	0.727273	0.0405818	8452, 4609	242	2	11756	48.5785	1	0.672562	50.0024
GOTERM_BP_DIRECT	GO:0000461~endonucleolytic cleavage to generate mature 3'-end of SSU-rRNA from (SSU-rRNA, 5.8S rRNA, LSU-rRNA)	2	0.727273	0.0405818	6227, 3921	242	2	11756	48.5785	1	0.672562	50.0024
GOTERM_MF_DIRECT	GO:0042605~peptide antigen binding	3	1.09091	0.0406292	3106, 8140, 3105	241	16	11857	9.22484	1	0.56653	45.1863
UP_KEYWORDS	Redox-active center	4	1.45455	0.0419619	7001, 7296, 5034, 5052	252	41	13285	5.14324	0.999995	0.335468	43.372
GOTERM_BP_DIRECT	GO:0006334~nucleosome assembly	5	1.81818	0.0420699	3006, 8971, 8358, 8367, 3017	242	64	11756	3.7952	1	0.679855	51.2843
GOTERM_CC_DIRECT	GO:0043234~protein complex	13	4.72727	0.0434181	1191, 80139, 203068, 1029, 476, 11331, 81, 60, 8358, 2783, 8367, 821, 4609	248	346	12453	1.88664	1	0.304072	45.4075
UP_KEYWORDS	Apoptosis	15	5.45455	0.0434212	10016, 415116, 1191, 2597, 8878, 1029, 23770, 10399, 54541, 708, 9927, 7009, 1603, 84231, 11083	252	445	13285	1.77702	0.999997	0.336053	44.5056
GOTERM_CC_DIRECT	GO:0005789~endoplasmic reticulum membrane	22	8	0.0436887	6184, 57142, 4779, 54732, 966, 5355, 10956, 23770, 60681, 3309, 6185, 821, 79143, 1603, 10016, 28972, 54972, 51435, 8985, 7009, 64834, 81502	248	710	12453	1.55592	1	0.299762	45.6177
GOTERM_CC_DIRECT	GO:0043034~costamere	3	1.09091	0.0438146	5339, 1605, 3856	248	17	12453	8.86124	1	0.294793	45.7153
GOTERM_CC_DIRECT	GO:0005604~basement membrane	5	1.81818	0.0438394	2192, 302, 3915, 3921, 1605	248	67	12453	3.74729	1	0.289438	45.7344
GOTERM_MF_DIRECT	GO:0005080~protein kinase C binding	4	1.45455	0.0438711	8878, 10399, 708, 3315	241	39	11857	5.04607	1	0.581327	47.8109
UP_KEYWORDS	Protein biosynthesis	7	2.54545	0.0442939	1982, 1938, 2935, 55699, 8662, 7407, 23367	252	136	13285	2.71344	0.999998	0.332965	45.1735
UP_SEQ_FEATURE	repeat:2-2	3	1.09091	0.044518	811, 7916, 821	250	18	13191	8.794	1	0.961257	50.9659
GOTERM_CC_DIRECT	GO:0009897~external side of plasma membrane	7	2.54545	0.0462331	811, 3916, 2683, 4162, 2022, 5034, 3383	248	131	12453	2.68318	1	0.297396	47.5579
GOTERM_BP_DIRECT	GO:0001666~response to hypoxia	7	2.54545	0.0465236	84962, 7852, 2022, 5315, 81, 54541, 9361	242	127	11756	2.67756	1	0.71113	54.9386
UP_SEQ_FEATURE	domain:RRM 3	4	1.45455	0.0471705	3191, 4691, 26986, 5725	250	43	13191	4.90828	1	0.959355	53.0533
INTERPRO	IPR000795:Elongation factor, GTP-binding domain	3	1.09091	0.0475502	9343, 1938, 2935	246	18	12512	8.47696	1	0.78521	51.778
GOTERM_CC_DIRECT	GO:0045121~membrane raft	8	2.90909	0.0487994	9289, 302, 682, 1938, 1605, 6281, 3945, 3383	248	167	12453	2.40545	1	0.305883	49.4495
GOTERM_BP_DIRECT	GO:0043488~regulation of mRNA stability	6	2.18182	0.0508426	3304, 5709, 5705, 3312, 26986, 3315	242	98	11756	2.97419	1	0.737678	58.235
GOTERM_BP_DIRECT	GO:0015949~nucleobase-containing small molecule interconversion	3	1.09091	0.0516179	4833, 6241, 7296	242	18	11756	8.09642	1	0.737516	58.8021
INTERPRO	IPR018039:Intermediate filament protein, conserved site	3	1.09091	0.052474	7431, 4000, 3856	246	19	12512	8.03081	1	0.802965	55.3782
INTERPRO	IPR004000:Actin-related protein	3	1.09091	0.052474	10097, 71, 60	246	19	12512	8.03081	1	0.802965	55.3782
SMART	SM00268:ACTIN	3	1.09091	0.0527317	10097, 71, 60	137	19	6919	7.97426	0.999633	0.676932	47.4754
BIOCARTA	h_prionPathway:Prion Pathway	3	1.09091	0.0530221	3915, 3921, 3309	43	12	1324	7.69767	0.993343	0.811886	44.8537
UP_SEQ_FEATURE	domain:EF-hand 1	6	2.18182	0.0537077	6275, 10016, 6277, 60681, 81, 51150	250	108	13191	2.93133	1	0.967133	57.8483
UP_SEQ_FEATURE	repeat:1-2	3	1.09091	0.0539469	811, 7916, 821	250	20	13191	7.9146	1	0.959904	58.0147
INTERPRO	IPR002048:EF-hand domain	7	2.54545	0.0540661	6275, 10016, 826, 6277, 60681, 81, 51150	246	138	12512	2.57995	1	0.798553	56.4877
INTERPRO	IPR012677:Nucleotide-binding, alpha-beta plait	9	3.27273	0.0547105	55544, 10949, 6430, 3191, 8662, 5935, 4691, 26986, 5725	246	210	12512	2.17979	1	0.788661	56.9293
UP_SEQ_FEATURE	site:Involved in polymerization	2	0.727273	0.0555714	84790, 10376	250	3	13191	35.176	1	0.955891	59.1289
UP_SEQ_FEATURE	domain:A to I editase	2	0.727273	0.0555714	104, 103	250	3	13191	35.176	1	0.955891	59.1289
UP_SEQ_FEATURE	chain:MHC class I antigen	2	0.727273	0.0555714	3106, 3105	250	3	13191	35.176	1	0.955891	59.1289
UP_KEYWORDS	S-nitrosylation	4	1.45455	0.0558365	7431, 2597, 5770, 3326	252	46	13285	4.5842	1	0.392226	53.3355
GOTERM_CC_DIRECT	GO:0005911~cell-cell junction	7	2.54545	0.0568519	84962, 302, 6624, 2316, 81, 3856, 360	248	138	12453	2.54707	1	0.341809	54.9828
GOTERM_MF_DIRECT	GO:0005509~calcium ion binding	15	5.45455	0.0575431	811, 6275, 976, 2192, 10016, 302, 826, 6277, 81, 60681, 3309, 6281, 1605, 821, 51150	241	433	11857	1.70436	1	0.670146	57.6443
INTERPRO	IPR001589:Actinin-type, actin-binding, conserved site	3	1.09091	0.0575701	5339, 2316, 81	246	20	12512	7.62927	1	0.792468	58.8393
INTERPRO	IPR009033:Calreticulin/calnexin, P domain	2	0.727273	0.0576054	811, 821	246	3	12512	33.9079	1	0.779739	58.8623
INTERPRO	IPR001580:Calreticulin/calnexin	2	0.727273	0.0576054	811, 821	246	3	12512	33.9079	1	0.779739	58.8623
INTERPRO	IPR018124:Calreticulin/calnexin, conserved site	2	0.727273	0.0576054	811, 821	246	3	12512	33.9079	1	0.779739	58.8623
INTERPRO	IPR002466:Adenosine deaminase/editase	2	0.727273	0.0576054	104, 103	246	3	12512	33.9079	1	0.779739	58.8623
SMART	SM00552:ADEAMc	2	0.727273	0.0578248	104, 103	137	3	6919	33.6691	0.999833	0.662788	50.7355
GOTERM_MF_DIRECT	GO:0051087~chaperone binding	5	1.81818	0.0579437	811, 1191, 3106, 476, 3309	241	72	11857	3.41661	1	0.659909	57.9045
UP_SEQ_FEATURE	region of interest:Rod	3	1.09091	0.058902	7431, 4000, 3856	250	21	13191	7.53771	1	0.956275	61.3271
UP_SEQ_FEATURE	region of interest:Linker 1	3	1.09091	0.058902	7431, 4000, 3856	250	21	13191	7.53771	1	0.956275	61.3271
UP_SEQ_FEATURE	region of interest:Coil 1B	3	1.09091	0.058902	7431, 4000, 3856	250	21	13191	7.53771	1	0.956275	61.3271
UP_SEQ_FEATURE	region of interest:Coil 1A	3	1.09091	0.058902	7431, 4000, 3856	250	21	13191	7.53771	1	0.956275	61.3271
UP_SEQ_FEATURE	repeat:1-1	3	1.09091	0.058902	811, 7916, 821	250	21	13191	7.53771	1	0.956275	61.3271
GOTERM_CC_DIRECT	GO:0031966~mitochondrial membrane	5	1.81818	0.0592389	506, 1191, 23770, 7009, 4722	248	74	12453	3.39282	1	0.347838	56.5117
GOTERM_MF_DIRECT	GO:0046977~TAP binding	2	0.727273	0.0595077	3106, 3105	241	3	11857	32.7994	1	0.657544	58.9063
GOTERM_MF_DIRECT	GO:0050211~procollagen galactosyltransferase activity	2	0.727273	0.0595077	79709, 8985	241	3	11857	32.7994	1	0.657544	58.9063
GOTERM_MF_DIRECT	GO:0008494~translation activator activity	2	0.727273	0.0595077	23367, 26986	241	3	11857	32.7994	1	0.657544	58.9063
UP_KEYWORDS	Neurodegeneration	10	3.63636	0.059699	1938, 2896, 8878, 10749, 2512, 9927, 5216, 3315, 4000, 400916	252	260	13285	2.02763	1	0.404163	55.8054
GOTERM_BP_DIRECT	GO:0002486~antigen processing and presentation of endogenous peptide antigen via MHC class I via ER pathway, TAP-independent	2	0.727273	0.0602534	3106, 3105	242	3	11756	32.3857	1	0.786456	64.6488
GOTERM_BP_DIRECT	GO:0035986~senescence-associated heterochromatin focus assembly	2	0.727273	0.0602534	1029, 3159	242	3	11756	32.3857	1	0.786456	64.6488
GOTERM_BP_DIRECT	GO:0016553~base conversion or substitution editing	2	0.727273	0.0602534	104, 103	242	3	11756	32.3857	1	0.786456	64.6488
GOTERM_BP_DIRECT	GO:0045815~positive regulation of gene expression, epigenetic	4	1.45455	0.0609564	10514, 60, 8358, 8367	242	44	11756	4.41623	1	0.78529	65.0887
GOTERM_BP_DIRECT	GO:0030449~regulation of complement activation	3	1.09091	0.0624225	966, 11331, 708	242	20	11756	7.28678	1	0.788346	65.9896
GOTERM_BP_DIRECT	GO:0030879~mammary gland development	3	1.09091	0.0624225	3219, 2194, 2683	242	20	11756	7.28678	1	0.788346	65.9896
INTERPRO	IPR011992:EF-hand-like domain	8	2.90909	0.0624305	6275, 10016, 826, 6277, 60681, 81, 6281, 51150	246	179	12512	2.27315	1	0.794634	61.9053
GOTERM_MF_DIRECT	GO:0048306~calcium-dependent protein binding	4	1.45455	0.0624378	6275, 10016, 302, 6277	241	45	11857	4.37326	1	0.663712	60.7236
GOTERM_CC_DIRECT	GO:0001725~stress fiber	4	1.45455	0.0627409	6624, 10634, 81, 10801	248	46	12453	4.36641	1	0.358853	58.668
GOTERM_MF_DIRECT	GO:0000166~nucleotide binding	11	4	0.0631829	55544, 10949, 6430, 3191, 8662, 476, 3068, 5935, 4691, 26986, 5725	241	284	11857	1.9056	1	0.656563	61.1736
UP_KEYWORDS	Extracellular matrix	7	2.54545	0.0635169	811, 2192, 7837, 302, 3915, 10491, 3959	252	149	13285	2.4767	1	0.415057	58.1274
GOTERM_CC_DIRECT	GO:0005770~late endosome	6	2.18182	0.0636366	375, 3916, 8878, 7852, 3312, 51150	248	108	12453	2.78965	1	0.357387	59.2033
UP_KEYWORDS	Chromosome	11	4	0.0637072	5518, 3006, 3159, 8334, 8971, 80854, 64324, 8358, 3015, 8367, 3017	252	305	13285	1.90131	1	0.407236	58.2401
UP_KEYWORDS	Limb-girdle muscular dystrophy	3	1.09091	0.0641095	5339, 1605, 4000	252	22	13285	7.18885	1	0.400792	58.4775
KEGG_PATHWAY	hsa04918:Thyroid hormone synthesis	5	1.81818	0.0644695	476, 2778, 1081, 3309, 821	139	53	4809	3.26388	0.999998	0.641294	56.6248
GOTERM_CC_DIRECT	GO:0005886~plasma membrane	60	21.8182	0.0667121	29123, 5127, 682, 1938, 2683, 3383, 10409, 84962, 6520, 2950, 2194, 7852, 3106, 6566, 3921, 248, 708, 3105, 506, 976, 302, 6509, 476, 3309, 6510, 375, 3916, 4162, 2023, 71, 5315, 7203, 11047, 84231, 966, 826, 2316, 5355, 3312, 1605, 2783, 3315, 54434, 360, 10942, 9123, 2597, 5654, 171177, 8140, 60, 51150, 57142, 2778, 5339, 7431, 5770, 64855, 2821, 81502	248	2474	12453	1.21779	1	0.365811	60.9931
GOTERM_BP_DIRECT	GO:0006607~NLS-bearing protein import into nucleus	3	1.09091	0.0680866	3838, 1605, 23633	242	21	11756	6.93979	1	0.812397	69.2689
INTERPRO	IPR002464:DNA/RNA helicase, ATP-dependent, DEAH-box type, conserved site	3	1.09091	0.0682458	1665, 1107, 22907	246	22	12512	6.9357	1	0.812457	65.2934
UP_SEQ_FEATURE	region of interest:Head	3	1.09091	0.0692554	7431, 4000, 3856	250	23	13191	6.88226	1	0.969966	67.4746
UP_SEQ_FEATURE	region of interest:Tail	3	1.09091	0.0692554	7431, 4000, 3856	250	23	13191	6.88226	1	0.969966	67.4746
UP_SEQ_FEATURE	calcium-binding region:3	3	1.09091	0.0692554	10016, 826, 51150	250	23	13191	6.88226	1	0.969966	67.4746
UP_KEYWORDS	rRNA-binding	3	1.09091	0.0693651	6203, 6132, 6205	252	23	13285	6.87629	1	0.417866	61.4665
GOTERM_CC_DIRECT	GO:0005720~nuclear heterochromatin	3	1.09091	0.0697947	10951, 10155, 3015	248	22	12453	6.84732	1	0.373889	62.7136
GOTERM_BP_DIRECT	GO:0071222~cellular response to lipopolysaccharide	5	1.81818	0.0732465	445, 1051, 2950, 10594, 3383	242	77	11756	3.15445	1	0.831132	71.9953
UP_SEQ_FEATURE	region of interest:4 X approximate repeats	2	0.727273	0.073403	811, 821	250	4	13191	26.382	1	0.97091	69.6702
UP_SEQ_FEATURE	binding site:NAD; via carbonyl oxygen	2	0.727273	0.073403	2597, 26227	250	4	13191	26.382	1	0.97091	69.6702
GOTERM_MF_DIRECT	GO:0019899~enzyme binding	11	4	0.0734936	3304, 10951, 3916, 23326, 5770, 10399, 3159, 3312, 3309, 5034, 7009	241	292	11857	1.85339	1	0.702427	66.9283
GOTERM_MF_DIRECT	GO:0019904~protein domain specific binding	8	2.90909	0.0737757	3916, 203068, 3399, 3476, 476, 3309, 8367, 10409	241	180	11857	2.18663	1	0.693071	67.0739
UP_KEYWORDS	Neuropathy	5	1.81818	0.0745823	55699, 22948, 9927, 3315, 4000	252	84	13285	3.13799	1	0.433573	64.2356
UP_SEQ_FEATURE	domain:CH 1	3	1.09091	0.0746391	5339, 2316, 81	250	24	13191	6.5955	1	0.967546	70.2973
UP_SEQ_FEATURE	domain:CH 2	3	1.09091	0.0746391	5339, 2316, 81	250	24	13191	6.5955	1	0.967546	70.2973
UP_KEYWORDS	Intermediate filament	3	1.09091	0.0747565	7431, 4000, 3856	252	24	13285	6.58978	1	0.426239	64.3248
GOTERM_CC_DIRECT	GO:0005790~smooth endoplasmic reticulum	3	1.09091	0.075472	811, 3309, 821	248	23	12453	6.54961	1	0.392524	65.6999
INTERPRO	IPR004743:Monocarboxylate transporter	2	0.727273	0.076063	9123, 6566	246	4	12512	25.4309	1	0.836125	69.4062
INTERPRO	IPR024706:Peroxiredoxin, AhpC-type	2	0.727273	0.076063	7001, 5052	246	4	12512	25.4309	1	0.836125	69.4062
INTERPRO	IPR005517:Translation elongation factor EFG/EF2, domain IV	2	0.727273	0.076063	9343, 1938	246	4	12512	25.4309	1	0.836125	69.4062
SMART	SM00889:SM00889	2	0.727273	0.0763522	9343, 1938	137	4	6919	25.2518	0.999991	0.7243	61.0941
GOTERM_MF_DIRECT	GO:0008144~drug binding	4	1.45455	0.0765217	2194, 2950, 6624, 3326	241	49	11857	4.01626	1	0.69634	68.461
GOTERM_MF_DIRECT	GO:0000979~RNA polymerase II core promoter sequence-specific DNA binding	4	1.45455	0.0765217	1051, 4150, 64324, 3015	241	49	11857	4.01626	1	0.69634	68.461
GOTERM_CC_DIRECT	GO:0035985~senescence-associated heterochromatin focus	2	0.727273	0.0770179	1029, 3159	248	4	12453	25.1069	1	0.393358	66.4737
GOTERM_MF_DIRECT	GO:0031852~mu-type opioid receptor binding	2	0.727273	0.0785492	2316, 2778	241	4	11857	24.5996	1	0.696001	69.4499
BIOCARTA	h_mta3Pathway:Downregulated of MTA-3 in ER-negative Breast Tumors	3	1.09091	0.079464	226, 2597, 3315	43	15	1324	6.15814	0.999508	0.851085	59.5283
INTERPRO	IPR001664:Intermediate filament protein	3	1.09091	0.0795117	7431, 4000, 3856	246	24	12512	6.35772	1	0.839748	71.072
GOTERM_BP_DIRECT	GO:0042270~protection from natural killer cell mediated cytotoxicity	2	0.727273	0.0795233	3106, 3105	242	4	11756	24.2893	1	0.85184	75.0054
GOTERM_BP_DIRECT	GO:0000320~re-entry into mitotic cell cycle	2	0.727273	0.0795233	899, 4609	242	4	11756	24.2893	1	0.85184	75.0054
GOTERM_BP_DIRECT	GO:0006382~adenosine to inosine editing	2	0.727273	0.0795233	104, 103	242	4	11756	24.2893	1	0.85184	75.0054
GOTERM_BP_DIRECT	GO:0071549~cellular response to dexamethasone stimulus	3	1.09091	0.0798921	445, 6161, 54541	242	23	11756	6.33633	1	0.849123	75.1725
GOTERM_BP_DIRECT	GO:0002181~cytoplasmic translation	3	1.09091	0.0798921	6181, 25873, 6132	242	23	11756	6.33633	1	0.849123	75.1725
SMART	SM01391:SM01391	3	1.09091	0.0799109	7431, 4000, 3856	137	24	6919	6.31296	0.999995	0.703574	62.8388
UP_KEYWORDS	mRNA splicing	9	3.27273	0.0799968	55544, 1665, 9343, 6430, 10594, 3312, 708, 26986, 5725	252	236	13285	2.01044	1	0.441004	66.914
KEGG_PATHWAY	hsa05169:Epstein-Barr virus infection	7	2.54545	0.08006	7431, 5709, 3106, 5705, 3105, 4609, 3383	139	105	4809	2.30647	1	0.696416	64.8631
GOTERM_MF_DIRECT	GO:0016887~ATPase activity	7	2.54545	0.0801543	3304, 506, 1191, 5705, 10749, 3312, 3309	241	148	11857	2.32699	1	0.693715	70.2123
UP_KEYWORDS	Amino-acid biosynthesis	3	1.09091	0.0802767	5831, 445, 26227	252	25	13285	6.32619	1	0.434383	67.0473
GOTERM_BP_DIRECT	GO:0008283~cell proliferation	11	4	0.0805715	4282, 1434, 6624, 23367, 7296, 3068, 54541, 5052, 10728, 4609, 5036	242	294	11756	1.81756	1	0.847592	75.4775
GOTERM_MF_DIRECT	GO:0008134~transcription factor binding	10	3.63636	0.0806914	1051, 10514, 64710, 2316, 3399, 1029, 5705, 3159, 708, 4609	241	259	11857	1.89958	1	0.686563	70.4634
GOTERM_MF_DIRECT	GO:0005178~integrin binding	5	1.81818	0.0816944	811, 2192, 81, 5034, 3383	241	81	11857	3.03699	1	0.6818	70.9271
GOTERM_BP_DIRECT	GO:0008380~RNA splicing	7	2.54545	0.0819172	55544, 1665, 9343, 5518, 10594, 708, 5725	242	147	11756	2.31326	1	0.848537	76.0711
KEGG_PATHWAY	hsa05034:Alcoholism	7	2.54545	0.0829584	8334, 2778, 8358, 3015, 2783, 8367, 3017	139	106	4809	2.28472	1	0.684847	66.2257
GOTERM_BP_DIRECT	GO:0071346~cellular response to interferon-gamma	3	1.09091	0.0860159	445, 2597, 4609	242	24	11756	6.07231	1	0.859002	77.7972
GOTERM_BP_DIRECT	GO:0030198~extracellular matrix organization	7	2.54545	0.0861048	2192, 7837, 682, 3915, 2683, 1605, 3383	242	149	11756	2.28221	1	0.855522	77.8333
UP_KEYWORDS	Calcium	16	5.81818	0.0862831	811, 6275, 976, 2192, 7837, 10016, 302, 826, 6277, 7086, 23770, 81, 60681, 821, 7009, 51150	252	538	13285	1.56783	1	0.451278	69.7905
GOTERM_CC_DIRECT	GO:0005719~nuclear euchromatin	3	1.09091	0.0872422	3006, 10155, 3015	248	25	12453	6.02565	1	0.428287	71.1982
KEGG_PATHWAY	hsa05414:Dilated cardiomyopathy	5	1.81818	0.0880863	71, 2778, 60, 1605, 4000	139	59	4809	2.93196	1	0.684193	68.5181
GOTERM_CC_DIRECT	GO:0048471~perinuclear region of cytoplasm	16	5.81818	0.0885105	811, 3304, 6275, 302, 1191, 6277, 2316, 10399, 2778, 2783, 4000, 375, 2597, 3916, 81, 10801	248	515	12453	1.56004	1	0.427463	71.7391
GOTERM_MF_DIRECT	GO:0042803~protein homodimerization activity	18	6.54545	0.0889472	6723, 6277, 10951, 2683, 2316, 10399, 6281, 1051, 10016, 2194, 6223, 8452, 8878, 7086, 6566, 2022, 81, 81502	241	588	11857	1.5061	1	0.704865	74.0838
UP_KEYWORDS	Cataract	4	1.45455	0.0891275	7431, 55699, 9361, 2512	252	56	13285	3.76559	1	0.454902	71.0145
GOTERM_BP_DIRECT	GO:0030036~actin cytoskeleton organization	6	2.18182	0.0900486	1729, 6624, 9168, 5216, 54434, 1072	242	116	11756	2.51268	1	0.864735	79.3807
GOTERM_MF_DIRECT	GO:0042169~SH2 domain binding	3	1.09091	0.0903046	8878, 10399, 1605	241	25	11857	5.9039	1	0.701688	74.638
GOTERM_MF_DIRECT	GO:0051020~GTPase binding	3	1.09091	0.0903046	2316, 2023, 2783	241	25	11857	5.9039	1	0.701688	74.638
GOTERM_BP_DIRECT	GO:0071407~cellular response to organic cyclic compound	4	1.45455	0.0905127	1051, 396, 6566, 3326	242	52	11756	3.73681	1	0.862601	79.556
KEGG_PATHWAY	hsa05131:Shigellosis	5	1.81818	0.0923807	1729, 10094, 71, 60, 5216	139	60	4809	2.88309	1	0.680295	70.3266
GOTERM_BP_DIRECT	GO:0030335~positive regulation of cell migration	7	2.54545	0.0926038	1729, 80139, 4162, 10399, 81, 1081, 3309	242	152	11756	2.23717	1	0.865558	80.3284
GOTERM_MF_DIRECT	GO:0032403~protein complex binding	8	2.90909	0.0933163	2192, 203068, 10491, 3476, 1605, 2783, 4609, 3856	241	191	11857	2.0607	1	0.705415	75.8282
INTERPRO	IPR019479:Peroxiredoxin, C-terminal	2	0.727273	0.0941606	7001, 5052	246	5	12512	20.3447	1	0.879371	77.2482
INTERPRO	IPR000866:Alkyl hydroperoxide reductase subunit C/ Thiol specific antioxidant	2	0.727273	0.0941606	7001, 5052	246	5	12512	20.3447	1	0.879371	77.2482
INTERPRO	IPR006536:HnRNP-L/PTB/hephaestus splicing factor	2	0.727273	0.0941606	3191, 5725	246	5	12512	20.3447	1	0.879371	77.2482
SMART	SM00838:SM00838	2	0.727273	0.094518	9343, 1938	137	5	6919	20.2015	0.999999	0.732282	69.2757
GOTERM_CC_DIRECT	GO:0097433~dense body	2	0.727273	0.0953308	71, 60	248	5	12453	20.0855	1	0.447045	74.4901
GOTERM_MF_DIRECT	GO:0044325~ion channel binding	5	1.81818	0.0966659	1729, 2316, 81, 3326, 6281	241	86	11857	2.86042	1	0.710288	77.0909
KEGG_PATHWAY	hsa05230:Central carbon metabolism in cancer	5	1.81818	0.0967735	9123, 6510, 8140, 5315, 4609	139	61	4809	2.83583	1	0.677261	72.0773
GOTERM_BP_DIRECT	GO:0002576~platelet degranulation	5	1.81818	0.0969155	1191, 226, 2316, 81, 3959	242	85	11756	2.85756	1	0.874819	81.8354
GOTERM_MF_DIRECT	GO:0001849~complement component C1q binding	2	0.727273	0.0972068	811, 708	241	5	11857	19.6797	1	0.704133	77.2889
GOTERM_MF_DIRECT	GO:0008379~thioredoxin peroxidase activity	2	0.727273	0.0972068	7001, 5052	241	5	11857	19.6797	1	0.704133	77.2889
GOTERM_MF_DIRECT	GO:0015186~L-glutamine transmembrane transporter activity	2	0.727273	0.0972068	6510, 6509	241	5	11857	19.6797	1	0.704133	77.2889
GOTERM_MF_DIRECT	GO:1990226~histone methyltransferase binding	2	0.727273	0.0972068	10951, 3326	241	5	11857	19.6797	1	0.704133	77.2889
GOTERM_MF_DIRECT	GO:0008097~5S rRNA binding	2	0.727273	0.0972068	6122, 1938	241	5	11857	19.6797	1	0.704133	77.2889
UP_SEQ_FEATURE	topological domain:Lumenal	12	4.36364	0.0972904	6184, 57142, 28972, 54732, 3916, 2683, 476, 6185, 29927, 821, 81502, 29071	250	374	13191	1.69296	1	0.986667	79.8459
GOTERM_BP_DIRECT	GO:2000510~positive regulation of dendritic cell chemotaxis	2	0.727273	0.0983996	811, 708	242	5	11756	19.4314	1	0.875667	82.3284
GOTERM_BP_DIRECT	GO:0090344~negative regulation of cell aging	2	0.727273	0.0983996	4282, 2305	242	5	11756	19.4314	1	0.875667	82.3284
GOTERM_BP_DIRECT	GO:0010830~regulation of myotube differentiation	2	0.727273	0.0983996	55544, 150094	242	5	11756	19.4314	1	0.875667	82.3284
GOTERM_BP_DIRECT	GO:0061635~regulation of protein complex stability	2	0.727273	0.0983996	8878, 3312	242	5	11756	19.4314	1	0.875667	82.3284
GOTERM_BP_DIRECT	GO:0051099~positive regulation of binding	2	0.727273	0.0983996	302, 6281	242	5	11756	19.4314	1	0.875667	82.3284
GOTERM_BP_DIRECT	GO:0016045~detection of bacterium	2	0.727273	0.0983996	3106, 3105	242	5	11756	19.4314	1	0.875667	82.3284
GOTERM_BP_DIRECT	GO:0046578~regulation of Ras protein signal transduction	2	0.727273	0.0983996	8878, 2305	242	5	11756	19.4314	1	0.875667	82.3284
GOTERM_BP_DIRECT	GO:0006868~glutamine transport	2	0.727273	0.0983996	6510, 6509	242	5	11756	19.4314	1	0.875667	82.3284
GOTERM_BP_DIRECT	GO:0006378~mRNA polyadenylation	3	1.09091	0.0986635	51692, 26986, 123169	242	26	11756	5.60521	1	0.873124	82.4148
GOTERM_BP_DIRECT	GO:0046034~ATP metabolic process	3	1.09091	0.0986635	3304, 506, 3312	242	26	11756	5.60521	1	0.873124	82.4148
GOTERM_BP_DIRECT	GO:0002479~antigen processing and presentation of exogenous peptide antigen via MHC class I, TAP-dependent	4	1.45455	0.0986835	5709, 3106, 5705, 3105	242	54	11756	3.59841	1	0.869906	82.4213
PIR_SUPERFAMILY	PIRSF000239:peroxiredoxin, AhpC type	2	0.727273	0.0998424	7001, 5052	34	4	1273	18.7206	0.96547	0.96547	59.7875

## Sheet: YTHDF1
Category	Term	Count	%	PValue	Genes	List Total	Pop Hits	Pop Total	Fold Enrichment	Bonferroni	Benjamini	FDR
UP_KEYWORDS	Phosphoprotein	4006	59.6841	1.86156e-69	8227, 8220, 6873, 79807, 23654, 6874, 6871, 5372, 6872, 10992, 25796, 23657, 6868, 2950, 6867, 535, 63916, 1822, 1820, 63917, 2957, 2956, 537, 1829, 8218, 1827, 6093, 79810, 23649, 6091, 23647, 90624, 23648, 23645, 6883, 6885, 5362, 5364, 3297, 79813, 540, 6879, 5358, 6875, 6878, 1810, 546, 25782, 10094, 219899, 8208, 8243, 23636, 8242, 51493, 23637, 51491, 51496, 51495, 6895, 5352, 23633, 6894, …	6573	7078	13285	1.14393	1.13555e-66	1.13555e-66	2.7556e-66
UP_KEYWORDS	Acetylation	1983	29.5441	6.21055e-67	90639, 8220, 5373, 5372, 25796, 10992, 6872, 29914, 6491, 2950, 6867, 1822, 2957, 2956, 8218, 8216, 6093, 23648, 6882, 3297, 5358, 10092, 10097, 546, 1810, 10094, 80724, 8208, 8209, 80728, 8243, 23636, 1434, 51491, 1432, 1431, 51496, 51495, 22919, 51499, 23633, 6894, 513, 6888, 1841, 84886, 6470, 22928, 5347, 6472, 515, 401505, 1445, 8237, 79832, 128866, 79837, 10078, 10079, 90268, 5339, 10075, 5…	6573	3156	13285	1.26994	3.78843e-64	1.89422e-64	9.19325e-64
UP_KEYWORDS	Nucleus	2544	37.9023	2.1149e-54	8227, 8220, 3280, 6873, 3281, 6874, 6871, 6872, 10992, 25799, 90233, 29914, 22906, 147947, 22903, 2950, 6867, 25793, 1822, 22900, 1820, 2957, 2956, 2958, 6497, 6495, 6494, 6493, 23649, 23648, 6882, 6883, 6884, 23641, 3298, 3297, 79813, 6879, 29903, 6875, 6878, 546, 1810, 84893, 149603, 8208, 80728, 8243, 23636, 51493, 8242, 51491, 1434, 51497, 1432, 138151, 6895, 57223, 79828, 2975, 10084, 1843, …	6573	4300	13285	1.19577	1.29009e-51	4.3003e-52	3.13062e-51
GOTERM_MF_DIRECT	GO:0044822~poly(A) RNA binding	757	11.2783	4.87968e-48	8880, 8227, 84271, 80742, 84273, 8886, 140890, 23518, 10992, 10898, 51377, 26608, 1728, 55379, 1729, 11097, 2011, 79080, 6780, 79810, 55225, 55226, 27079, 63931, 51163, 7343, 7341, 85476, 2023, 7203, 5216, 11083, 8243, 55920, 84294, 51493, 51491, 1431, 22919, 8761, 7329, 821, 311, 55922, 7332, 85441, 84881, 51490, 8446, 811, 23524, 10885, 327, 23521, 328, 226, 10884, 284695, 51386, 22907, 7317, 7…	5973	1060	11857	1.41766	1.30092e-44	1.30092e-44	8.67119e-45
GOTERM_CC_DIRECT	GO:0005654~nucleoplasm	1587	23.6442	1.52667e-46	8227, 3280, 6873, 6874, 3281, 10992, 6872, 22905, 535, 1822, 1820, 22900, 2957, 2956, 6498, 6497, 2958, 6493, 23649, 6882, 6883, 6884, 3297, 79813, 6879, 29903, 6875, 6878, 149603, 8208, 8243, 8242, 51493, 1434, 1432, 51497, 51496, 57228, 57223, 23633, 10084, 2975, 2976, 2971, 22927, 5347, 10081, 2972, 22926, 1849, 1847, 6478, 1848, 1845, 515, 1846, 79830, 79834, 138639, 79833, 22909, 10075, 2962…	6202	2544	12453	1.25257	1.90987e-43	1.90987e-43	2.48091e-43
GOTERM_CC_DIRECT	GO:0005634~nucleus	2481	36.9636	2.79134e-38	8227, 8220, 3280, 3281, 6871, 6872, 25799, 90233, 29914, 22906, 147947, 22903, 2950, 6867, 25793, 1822, 22900, 1820, 6498, 6497, 6495, 1827, 6494, 6493, 23648, 5361, 6884, 6885, 23641, 3298, 3297, 5366, 79813, 6878, 546, 1810, 84893, 149603, 8208, 80728, 8243, 51493, 8242, 51491, 1434, 51497, 1432, 1431, 138151, 6895, 79828, 23633, 6894, 2975, 10084, 1843, 6888, 1841, 22927, 2971, 6470, 10082, 22…	6202	4298	12453	1.15905	3.49196e-35	1.74598e-35	4.53604e-35
UP_KEYWORDS	Ubl conjugation	961	14.3176	2.76891e-32	54101, 8227, 84271, 332, 3476, 330, 10992, 331, 22905, 6491, 3480, 8737, 1820, 10714, 6498, 6495, 55223, 204851, 6091, 23645, 8028, 6885, 3298, 3297, 79813, 10092, 546, 8724, 7341, 10725, 84893, 149603, 84085, 55215, 1432, 138151, 7329, 163786, 55922, 2975, 7332, 5347, 10733, 8445, 79830, 328, 329, 221927, 128866, 324, 7317, 8045, 7316, 22909, 23623, 90268, 10743, 85458, 84876, 6897, 22913, 7324,…	6573	1509	13285	1.28716	1.68903e-29	4.22258e-30	4.09872e-29
GOTERM_MF_DIRECT	GO:0005515~protein binding	3922	58.4327	4.54362e-31	8227, 8220, 3280, 6873, 79807, 23654, 6874, 3281, 5373, 6871, 5372, 6872, 10992, 25796, 23657, 79803, 10994, 6868, 2950, 6867, 535, 63916, 1822, 25793, 1820, 2957, 2956, 2958, 8218, 6093, 6091, 23647, 23648, 6882, 23645, 6883, 6884, 6885, 5362, 23641, 3298, 5364, 3297, 79813, 5366, 540, 6879, 10092, 6878, 1810, 546, 10094, 219899, 149603, 8243, 23636, 51493, 23637, 51497, 138151, 51495, 6891, 689…	5973	7180	11857	1.08434	1.21133e-27	6.05664e-28	8.07401e-28
UP_KEYWORDS	Isopeptide bond	662	9.86293	3.19564e-27	147808, 54101, 8227, 805, 84271, 23512, 2002, 801, 23515, 51372, 10992, 331, 197407, 3480, 1729, 51176, 1820, 29128, 10714, 6498, 605, 2017, 204851, 26009, 8028, 6885, 207, 3298, 208, 3297, 79813, 5358, 546, 8312, 7341, 10725, 149603, 402, 7203, 5216, 55215, 7227, 138151, 7329, 27089, 55922, 2975, 513, 8301, 5347, 6748, 150468, 6744, 90933, 79830, 23522, 226, 7316, 5345, 23528, 10743, 6897, 55388…	6573	1008	13285	1.32738	1.94934e-24	3.89869e-25	4.7304e-24
UP_KEYWORDS	Transcription	1143	17.0292	5.19972e-19	3280, 332, 6873, 6874, 6871, 6872, 25799, 221937, 90233, 147947, 79088, 745, 1822, 1820, 2957, 2958, 6495, 6493, 84289, 204851, 23648, 6882, 8028, 6883, 6884, 6885, 3298, 3297, 6879, 8726, 7342, 8725, 6875, 7343, 1810, 8019, 546, 6878, 10725, 8208, 374655, 8242, 55213, 1432, 51497, 8031, 138151, 55922, 2975, 10084, 10732, 2976, 7332, 2971, 22927, 2972, 22926, 149951, 85441, 8427, 328, 329, 79831,…	6573	1949	13285	1.18531	3.17183e-16	5.28639e-17	7.69697e-16
UP_KEYWORDS	Transcription regulation	1108	16.5077	1.93782e-18	3280, 6873, 332, 6874, 6871, 6872, 25799, 221937, 90233, 147947, 79088, 745, 1822, 1820, 2957, 2958, 6495, 6493, 84289, 204851, 23648, 6882, 8028, 6883, 6884, 6885, 3298, 3297, 6879, 8726, 7342, 8725, 6875, 7343, 1810, 8019, 546, 6878, 10725, 8208, 374655, 8242, 55213, 1432, 51497, 8031, 138151, 55922, 10084, 10732, 7332, 2971, 22927, 2972, 22926, 149951, 85441, 8427, 328, 329, 79831, 284695, 100…	6573	1889	13285	1.18551	1.18207e-15	1.68867e-16	2.86849e-15
GOTERM_CC_DIRECT	GO:0005730~nucleolus	489	7.28546	1.29793e-14	79706, 79707, 23512, 10892, 8886, 6872, 10609, 1820, 146956, 79080, 6495, 219736, 55226, 26009, 6884, 8731, 23641, 29903, 8726, 7343, 6875, 7341, 5253, 55920, 84294, 51491, 5250, 51290, 205564, 55922, 2975, 51199, 5347, 10733, 90933, 8428, 10885, 328, 23521, 55201, 51388, 80854, 55105, 88745, 55388, 10741, 10607, 64793, 64794, 989, 3110, 988, 6597, 339230, 23557, 8467, 7259, 55339, 55272, 84172, …	6202	774	12453	1.26856	1.625e-11	5.41667e-12	2.11053e-11
UP_KEYWORDS	Methylation	521	7.76222	3.66622e-14	8880, 805, 84271, 801, 6874, 1314, 10992, 23518, 221937, 22905, 3482, 1822, 25793, 607, 2017, 6780, 84289, 50717, 8407, 23648, 26000, 10629, 26003, 8726, 6878, 8724, 546, 10620, 8867, 149603, 8412, 11083, 5250, 8030, 1431, 8761, 148252, 22927, 23524, 284695, 10075, 5339, 85456, 1832, 610, 22916, 203068, 613, 808, 10749, 84872, 85455, 64794, 136647, 85358, 6599, 26037, 57584, 5911, 5912, 10652, 55…	6573	839	13285	1.25509	2.23488e-11	2.79354e-12	5.42344e-11
GOTERM_CC_DIRECT	GO:0016020~membrane	1071	15.9565	1.43356e-12	54101, 10999, 23659, 23657, 79803, 10994, 90231, 334, 79087, 29914, 3480, 6868, 3482, 63916, 6867, 84079, 8218, 6494, 55226, 55227, 118987, 23645, 540, 8729, 10097, 738, 10094, 10724, 8411, 55920, 55215, 1435, 1434, 51497, 51290, 6891, 8760, 6892, 57222, 311, 23633, 2975, 79627, 84888, 22926, 8239, 51293, 8443, 85441, 515, 8428, 140885, 221927, 323, 79837, 55207, 10075, 84876, 203062, 80709, 8545…	6202	1869	12453	1.15059	1.79333e-09	4.48333e-10	2.32953e-09
GOTERM_MF_DIRECT	GO:0098641~cadherin binding involved in cell-cell adhesion	200	2.97974	1.45222e-12	10890, 23513, 800, 22905, 11329, 55379, 3927, 151963, 2011, 2017, 8407, 55854, 23647, 1982, 1983, 1981, 2023, 11336, 1495, 5216, 10726, 1453, 829, 2316, 2317, 10226, 22919, 8301, 8428, 226, 54874, 128866, 5339, 85456, 3939, 4627, 6386, 10606, 10598, 56904, 989, 4854, 83939, 118, 10755, 10652, 57488, 50848, 302, 57496, 9208, 23367, 28988, 55898, 90102, 23164, 9588, 8351, 8826, 8354, 55324, 64837, …	5973	281	11857	1.41288	3.87149e-09	1.2905e-09	2.58051e-09
GOTERM_BP_DIRECT	GO:0098609~cell-cell adhesion	190	2.83075	2.39504e-12	4301, 10890, 682, 800, 6164, 3337, 10694, 83604, 9748, 10298, 22905, 11329, 55379, 1627, 63916, 3927, 2011, 151963, 51429, 2017, 26156, 10163, 8407, 55854, 23647, 9351, 6159, 8496, 25978, 1982, 1983, 1981, 2023, 11336, 5216, 10726, 1453, 10528, 829, 51100, 10226, 2317, 22919, 3312, 57698, 3895, 6187, 6282, 8301, 9218, 57410, 3417, 79026, 5962, 10801, 1266, 11135, 7112, 8428, 9230, 26130, 57142, 2…	5906	266	11756	1.4218	1.90816e-08	1.90816e-08	4.78145e-09
UP_KEYWORDS	Ribonucleoprotein	185	2.75626	2.77839e-12	7538, 9343, 6160, 6161, 51373, 26750, 6164, 6205, 6206, 6165, 6208, 6168, 51081, 6209, 6167, 6169, 9553, 124995, 220988, 740, 3921, 128308, 678, 677, 55052, 6150, 6217, 6155, 63931, 6159, 6158, 6157, 5036, 6156, 7884, 64928, 6224, 6223, 6222, 79590, 84545, 9801, 6182, 6181, 78988, 6183, 65080, 10528, 51021, 92345, 9987, 54534, 6188, 51691, 6187, 27316, 28998, 55168, 25804, 10011, 10949, 29088, 83…	6573	261	13285	1.43261	1.69478e-09	1.88309e-10	4.11267e-09
GOTERM_CC_DIRECT	GO:0005840~ribosome	116	1.72825	4.73991e-12	170958, 7536, 6160, 6161, 26750, 6164, 51373, 6205, 338699, 6165, 6208, 51081, 6168, 6209, 6167, 6169, 124995, 740, 128308, 55052, 6150, 6217, 6155, 23, 6159, 63931, 6158, 6157, 6156, 64928, 6224, 6223, 6222, 79590, 84545, 4690, 9801, 6181, 65080, 51021, 54534, 55319, 821, 6188, 6187, 54475, 55168, 28998, 83694, 63875, 6171, 23521, 328, 8562, 10884, 51182, 51116, 6176, 6175, 6203, 6202, 6201, 549…	6202	149	12453	1.5632	5.92958e-09	1.18592e-09	7.70249e-09
GOTERM_CC_DIRECT	GO:0005913~cell-cell adherens junction	213	3.17342	5.81407e-12	10890, 23513, 800, 22905, 11329, 55379, 3927, 151963, 2011, 2017, 8407, 55854, 23647, 1982, 1983, 1981, 2023, 11336, 1495, 5216, 10726, 1453, 829, 2316, 2317, 10226, 22919, 57228, 8301, 4092, 8428, 54874, 226, 128866, 324, 5339, 85456, 3939, 4627, 6386, 10606, 10598, 56904, 989, 4854, 83939, 7791, 118, 10755, 10652, 57488, 50848, 302, 57496, 9208, 23367, 28988, 55898, 90102, 23164, 9588, 8351, 88…	6202	308	12453	1.38858	7.27333e-09	1.21222e-09	9.44801e-09
UP_KEYWORDS	RNA-binding	358	5.33373	3.80595e-11	253943, 8227, 51574, 84271, 1478, 10891, 79707, 8886, 51373, 23515, 6205, 10898, 10482, 23277, 55544, 1974, 84678, 11325, 8871, 6780, 55225, 84285, 115752, 8731, 133522, 7884, 11338, 1981, 7073, 84991, 1984, 6222, 92609, 8867, 440275, 9987, 92345, 22794, 8761, 16, 54888, 6895, 6894, 51691, 7625, 23013, 2971, 1994, 4234, 23112, 8446, 23524, 9991, 328, 10212, 22907, 51388, 10492, 6203, 10073, 25917…	6573	568	13285	1.27389	2.32163e-08	2.32163e-09	5.63382e-08
UP_KEYWORDS	Repressor	331	4.93147	4.02342e-11	55749, 4799, 170959, 3087, 4204, 2005, 7753, 3720, 23512, 3280, 332, 59348, 132660, 221937, 23272, 10614, 29128, 84678, 6495, 171023, 4488, 1488, 1487, 10336, 55758, 79718, 23269, 57215, 339344, 1982, 9869, 10472, 7071, 11338, 8726, 8725, 342371, 1810, 4221, 2023, 11331, 8242, 51592, 54880, 7227, 51497, 9987, 55729, 138151, 23532, 51193, 27086, 5611, 55922, 359948, 9191, 163126, 23013, 144455, 23…	6573	520	13285	1.28654	2.45428e-08	2.23117e-09	5.95572e-08
UP_SEQ_FEATURE	mutagenesis site	1002	14.9285	9.77603e-11	338, 55236, 23654, 332, 3281, 6872, 331, 3480, 22901, 8737, 1820, 22900, 2957, 2956, 85464, 6493, 6093, 8732, 23645, 8731, 6885, 55959, 3298, 5364, 3297, 5366, 6879, 7347, 7345, 8726, 7341, 8411, 80727, 10726, 8243, 8242, 1435, 1432, 8031, 27183, 22919, 7329, 25778, 5351, 10084, 84888, 22926, 5347, 8440, 10733, 6477, 8446, 8428, 1445, 328, 324, 7316, 23623, 55207, 10076, 10075, 10741, 10073, 2962…	6537	1768	13191	1.14363	1.11554e-06	1.11554e-06	2.02196e-07
UP_KEYWORDS	Activator	345	5.14005	2.8262e-10	3725, 55749, 4799, 7494, 57343, 2005, 4205, 10891, 2002, 4899, 9862, 132660, 3727, 221937, 57862, 8320, 745, 51176, 4212, 4211, 400569, 7161, 23133, 65056, 6495, 84289, 219736, 79718, 3096, 3091, 23, 3092, 3298, 3297, 133522, 7343, 54797, 6777, 10725, 23125, 6778, 4790, 440275, 4609, 5253, 4779, 4774, 9987, 4775, 55729, 8031, 84498, 84193, 359948, 1997, 23013, 1998, 144455, 253461, 81566, 2972, 2…	6573	551	13285	1.26551	1.72398e-07	1.43665e-08	4.18353e-07
GOTERM_BP_DIRECT	GO:0006364~rRNA processing	145	2.16031	3.8836e-10	6160, 79707, 6161, 6164, 6205, 6206, 6165, 6208, 6168, 6209, 6167, 54512, 6169, 54913, 23076, 79080, 3921, 84135, 84946, 115752, 6217, 6155, 51018, 6159, 22984, 6158, 6157, 5036, 6156, 51096, 6224, 6223, 6222, 55035, 54881, 65083, 6181, 1453, 10528, 92345, 51202, 1454, 10171, 57050, 84128, 404672, 9221, 23481, 6188, 6187, 23195, 5822, 9775, 57418, 55661, 4809, 83732, 54606, 8568, 6171, 10885, 235…	5906	201	11756	1.43595	3.09406e-06	1.54703e-06	7.75307e-07
GOTERM_MF_DIRECT	GO:0003735~structural constituent of ribosome	138	2.05602	6.41959e-10	170958, 84275, 6160, 6161, 55186, 6164, 51373, 6205, 55744, 6206, 338699, 6165, 51629, 6208, 51081, 6168, 6209, 6167, 9553, 6169, 124995, 79085, 740, 3921, 128308, 60386, 55052, 6150, 6217, 6155, 63931, 6159, 6158, 6157, 6156, 64928, 6224, 6223, 6222, 203427, 10478, 79590, 84545, 10165, 10166, 9801, 6182, 6181, 78988, 5250, 6183, 81034, 51021, 8034, 6188, 6187, 55168, 28998, 29088, 63875, 1468, 6…	5973	190	11857	1.44181	1.71146e-06	4.27866e-07	1.14076e-06
GOTERM_MF_DIRECT	GO:0003677~DNA binding	771	11.4869	6.67195e-10	147808, 7494, 2005, 146050, 10891, 57209, 3280, 147807, 54107, 59348, 6874, 6871, 54108, 132660, 25799, 334, 197407, 147947, 8320, 79088, 745, 51176, 1820, 146956, 2957, 8877, 85464, 79603, 6495, 1827, 6493, 204851, 140467, 23649, 2016, 26009, 6882, 8028, 6883, 57215, 6884, 3298, 3297, 10629, 7342, 10626, 6875, 1810, 546, 6878, 10623, 58492, 84893, 2023, 10620, 6778, 58491, 374655, 55215, 8242, 2…	5973	1322	11857	1.15772	1.77874e-06	3.55748e-07	1.18561e-06
UP_KEYWORDS	DNA-binding	889	13.2449	8.75935e-10	3280, 54107, 6871, 54108, 6872, 334, 25799, 221937, 90233, 147947, 745, 79088, 1820, 2956, 79603, 6495, 6493, 204851, 23648, 8028, 3298, 3297, 7342, 6875, 7343, 1810, 546, 10725, 84893, 374655, 55215, 55922, 2975, 10732, 2971, 22926, 85441, 10736, 8427, 328, 55201, 284695, 100101467, 10075, 6899, 2962, 80709, 84878, 63967, 7597, 988, 55900, 571, 146198, 7596, 27164, 7592, 55279, 7392, 7391, 51274…	6573	1568	13285	1.14592	5.3432e-07	4.11016e-08	1.29662e-06
UP_KEYWORDS	Mitochondrion	581	8.65614	9.07925e-10	84275, 84273, 84274, 27069, 51373, 10899, 29914, 22906, 374291, 2950, 1727, 25793, 79085, 94097, 740, 1723, 2852, 79810, 204, 90624, 23645, 55361, 1327, 63931, 5366, 123263, 540, 63929, 8725, 85476, 402, 8209, 23786, 78988, 5250, 23530, 1431, 219, 8034, 8760, 51499, 27089, 513, 22921, 8303, 256643, 622, 51295, 6472, 518, 517, 516, 515, 401505, 328, 5245, 10884, 7317, 22907, 94081, 522, 6389, 9113…	6573	988	13285	1.18855	5.53834e-07	3.95596e-08	1.34397e-06
UP_KEYWORDS	Ribosomal protein	119	1.77294	9.52319e-10	6160, 6161, 26750, 6164, 51373, 6205, 6206, 6165, 6208, 51081, 6168, 6209, 6167, 9553, 6169, 124995, 740, 3921, 128308, 55052, 6150, 6217, 6155, 6159, 63931, 6158, 6157, 6156, 64928, 6224, 6223, 6222, 79590, 84545, 6182, 9801, 6181, 78988, 6183, 65080, 51021, 54534, 6188, 6187, 55168, 28998, 29088, 83694, 63875, 6171, 23521, 10884, 51116, 6176, 6175, 6203, 6202, 6201, 7818, 54948, 51318, 23107, 8…	6573	162	13285	1.48467	5.80915e-07	3.87276e-08	1.40968e-06
UP_KEYWORDS	Cell cycle	366	5.45292	9.80728e-10	55749, 332, 8317, 55844, 6872, 132660, 10899, 55544, 6867, 10615, 29128, 7161, 23133, 2852, 219736, 23503, 83903, 55752, 55958, 9874, 54790, 114799, 29901, 91768, 56647, 402, 8208, 23126, 440275, 11334, 10726, 55215, 8243, 55920, 23637, 126731, 55213, 1452, 23397, 205564, 27183, 7329, 22919, 54888, 163786, 311, 1843, 25909, 388610, 144455, 1069, 5347, 8239, 55665, 55660, 6478, 51490, 6477, 9994, …	6573	593	13285	1.24745	5.98244e-07	3.73902e-08	1.45174e-06
GOTERM_CC_DIRECT	GO:0005829~cytosol	1558	23.2122	9.95502e-10	90639, 8226, 5373, 5372, 25796, 6491, 22903, 2950, 63916, 25793, 84078, 84079, 8218, 6494, 6093, 23647, 23645, 6885, 3297, 5366, 10092, 10097, 10094, 8208, 84890, 80728, 8243, 23637, 1434, 1432, 22919, 25778, 6895, 23633, 6888, 1841, 22921, 6470, 22927, 5347, 8239, 1849, 6478, 1848, 6477, 1845, 1445, 79833, 128866, 79837, 90268, 5339, 10075, 1831, 6897, 10073, 5335, 908, 22916, 526, 989, 29952, 5…	6202	2844	12453	1.09997	1.24537e-06	1.7791e-07	1.61773e-06
GOTERM_CC_DIRECT	GO:0005737~cytoplasm	2232	33.2539	1.22565e-09	90639, 8227, 8226, 3280, 79807, 6874, 5373, 5372, 949, 29914, 22906, 6491, 6868, 2950, 6867, 535, 63916, 25793, 1822, 22900, 1820, 2957, 2956, 6498, 84079, 6497, 6495, 1827, 23649, 6091, 23647, 5361, 23645, 6885, 3298, 3297, 5358, 10092, 29903, 10097, 29901, 6875, 6878, 10094, 25782, 219899, 149603, 8208, 8243, 23636, 51493, 1434, 1432, 51495, 22919, 25778, 6895, 57223, 79828, 23633, 10084, 1843,…	6202	4164	12453	1.07628	1.53329e-06	1.91661e-07	1.99173e-06
GOTERM_BP_DIRECT	GO:0006351~transcription, DNA-templated	913	13.6025	1.28893e-09	3280, 332, 25799, 221937, 90233, 147947, 745, 79088, 1822, 6497, 6493, 84289, 204851, 23648, 8028, 6885, 3297, 8726, 7342, 8725, 1810, 546, 8019, 90632, 8208, 374655, 23636, 8242, 55213, 1432, 138151, 8031, 55922, 2975, 10084, 2976, 7332, 22927, 22926, 85441, 149951, 8427, 328, 329, 79831, 284695, 100101467, 322, 85457, 6899, 22913, 84878, 29950, 7597, 988, 55900, 27161, 146198, 55904, 7592, 1095…	5906	1595	11756	1.1394	1.02689e-05	3.42296e-06	2.57317e-06
GOTERM_MF_DIRECT	GO:0003682~chromatin binding	227	3.382	1.88499e-09	3725, 170959, 3087, 4204, 2005, 3720, 4205, 2002, 6873, 6871, 8320, 51176, 1820, 2956, 23135, 4211, 6498, 7161, 6497, 23133, 6495, 1482, 2852, 1488, 84289, 9869, 8726, 8314, 8725, 7343, 8019, 546, 6777, 4221, 6602, 23125, 4790, 8208, 54881, 8243, 23636, 7227, 4774, 8861, 27086, 57616, 23394, 6472, 4091, 2308, 55870, 79831, 22907, 1063, 80854, 53615, 322, 1058, 1059, 222229, 6595, 6599, 10951, 362…	5973	342	11857	1.3176	5.02537e-06	8.37564e-07	3.34963e-06
UP_KEYWORDS	Ubl conjugation pathway	355	5.28903	4.01427e-09	4799, 10206, 140459, 10892, 55236, 330, 331, 51377, 59349, 10617, 10616, 59343, 10489, 25793, 6612, 29128, 84678, 6613, 55230, 171023, 54894, 50717, 55223, 92912, 84282, 8405, 79718, 81847, 3093, 55958, 140460, 140461, 7337, 7347, 80829, 26001, 55658, 7345, 8314, 8315, 7341, 56929, 84893, 149603, 84085, 51592, 7327, 205564, 7326, 7329, 81559, 123228, 118424, 7189, 23014, 7187, 7186, 7332, 55521, …	6573	578	13285	1.24136	2.4487e-06	1.44041e-07	5.94219e-06
UP_KEYWORDS	Chromatin regulator	181	2.69666	9.38969e-09	7290, 200424, 57343, 23512, 3720, 84733, 8535, 1108, 1106, 1107, 29855, 1105, 79903, 10927, 6419, 339287, 11011, 54496, 23466, 84678, 29128, 56916, 23135, 51773, 23133, 10155, 171023, 11091, 84289, 83903, 23067, 79718, 9739, 51230, 4297, 7403, 55193, 54790, 79813, 9874, 9869, 1616, 23476, 8314, 8726, 8019, 546, 4221, 6602, 8295, 1613, 64324, 23314, 9643, 5931, 5253, 10524, 55723, 8242, 55213, 548…	6573	271	13285	1.34992	5.7277e-06	3.18206e-07	1.38992e-05
GOTERM_BP_DIRECT	GO:0006412~translation	152	2.2646	1.82489e-08	170958, 84275, 9343, 6160, 6161, 51373, 55186, 6164, 6205, 55744, 338699, 6206, 6165, 51629, 6208, 51081, 6168, 6209, 6167, 6169, 124995, 79085, 740, 1979, 3921, 128308, 60386, 26156, 55052, 6150, 6217, 6155, 23, 63931, 6159, 207, 6158, 6157, 6156, 64928, 1981, 6224, 6223, 6222, 203427, 10478, 79590, 84545, 10165, 10166, 9801, 6181, 78988, 5250, 6183, 81034, 51021, 6301, 8034, 8761, 6188, 6187, 3…	5906	220	11756	1.37527	0.000145378	3.63466e-05	3.64314e-05
KEGG_PATHWAY	hsa04141:Protein processing in endoplasmic reticulum	112	1.66865	3.73258e-08	7494, 10130, 22872, 55741, 55432, 3337, 10294, 9451, 51009, 10299, 10808, 23645, 51360, 51619, 23471, 5034, 4121, 440275, 824, 29978, 6184, 823, 3998, 29979, 7327, 80267, 7415, 7326, 6400, 3312, 56886, 5611, 118424, 821, 6185, 10427, 7186, 10277, 3320, 1649, 22926, 9632, 6748, 55666, 6746, 201595, 4780, 10113, 7184, 6745, 10802, 811, 596, 2081, 3326, 9373, 7321, 79139, 7324, 7322, 27102, 7323, 91…	2423	155	4809	1.43413	1.08991e-05	1.08991e-05	4.9673e-05
GOTERM_MF_DIRECT	GO:0031625~ubiquitin protein ligase binding	174	2.59237	7.27247e-08	10152, 7494, 90135, 64112, 1191, 10891, 55432, 8678, 9927, 22903, 8323, 10613, 7167, 27338, 25793, 8325, 8737, 63893, 8878, 6497, 6613, 51429, 10155, 25820, 55643, 57763, 57761, 8405, 672, 3091, 3093, 4193, 22888, 5036, 409, 1616, 54926, 79899, 7345, 8312, 7341, 875, 11146, 4792, 79594, 8554, 5144, 22794, 5970, 7414, 3313, 7327, 7415, 7326, 7329, 6950, 3312, 10670, 10221, 118424, 7189, 7187, 2319…	5973	260	11857	1.32849	0.000193865	2.76974e-05	0.000129232
GOTERM_MF_DIRECT	GO:0003723~RNA binding	290	4.32062	9.13132e-08	253943, 8880, 1477, 51574, 1478, 10891, 79707, 23512, 8886, 23515, 55744, 6208, 10898, 6209, 10482, 3726, 8871, 115752, 6217, 8731, 80222, 1982, 133522, 11338, 1981, 7073, 6224, 342371, 84991, 1984, 6222, 92609, 8867, 23536, 92345, 22794, 8761, 6894, 51691, 7625, 2971, 1994, 84881, 55660, 7184, 8446, 9991, 51388, 10492, 6897, 6201, 25917, 22913, 22916, 10594, 51282, 64794, 64283, 4857, 55135, 551…	5973	464	11857	1.24069	0.000243411	3.04297e-05	0.000162263
GOTERM_BP_DIRECT	GO:0000184~nuclear-transcribed mRNA catabolic process, nonsense-mediated decay	84	1.25149	9.52437e-08	11224, 6122, 6160, 6124, 6125, 6161, 6164, 6205, 6206, 84305, 6165, 6208, 6168, 6209, 55181, 6167, 6169, 2197, 3921, 2107, 6217, 6155, 6159, 6158, 6157, 7311, 6156, 1981, 55802, 25873, 6224, 6223, 6222, 5976, 6191, 3646, 6193, 6194, 26986, 6181, 6147, 6141, 6143, 26019, 2935, 22794, 4736, 9887, 5520, 6188, 6187, 23293, 9775, 5515, 5518, 55629, 6138, 9811, 9939, 6137, 6134, 6171, 6135, 6132, 23521…	5906	111	11756	1.50634	0.000758519	0.00015175	0.000190141
KEGG_PATHWAY	hsa03010:Ribosome	90	1.34088	1.16826e-07	11224, 6122, 6160, 6124, 6125, 6161, 6164, 51373, 6205, 6206, 6165, 6208, 51081, 6168, 6209, 6167, 9553, 6169, 2197, 124995, 3921, 64981, 55052, 6150, 6217, 6155, 63931, 6159, 6158, 6157, 7311, 6156, 54460, 51264, 64928, 64979, 65005, 25873, 6224, 6223, 6222, 29074, 79590, 65008, 6191, 6193, 6194, 9801, 6182, 6181, 6147, 6183, 6141, 51021, 6143, 4736, 6188, 6187, 64969, 55168, 28998, 64968, 64963…	2423	121	4809	1.47625	3.41125e-05	1.70564e-05	0.000155471
GOTERM_MF_DIRECT	GO:0003713~transcription coactivator activity	149	2.2199	1.4754e-07	3725, 55749, 51003, 10891, 6874, 6871, 6872, 3727, 2648, 3726, 10691, 9049, 1387, 64210, 10923, 2957, 10138, 2958, 7543, 171023, 1488, 9443, 9442, 9441, 672, 6882, 9913, 6883, 3298, 7337, 283149, 10001, 10915, 10629, 6879, 6875, 6602, 9439, 79595, 5253, 10524, 8554, 26205, 8031, 25988, 2626, 84193, 10521, 92140, 10084, 7332, 4802, 10011, 6942, 22926, 23326, 148398, 29777, 1999, 10413, 7528, 328, …	5973	219	11857	1.35059	0.000393264	4.37036e-05	0.000262178
UP_KEYWORDS	Cytoplasm	2056	30.6317	1.5432e-07	90639, 79807, 5373, 5372, 25796, 79803, 22905, 29914, 22906, 6491, 22903, 2950, 63916, 6867, 25793, 1822, 22900, 1820, 6495, 6494, 6093, 6885, 3298, 3297, 540, 5358, 10092, 10097, 29901, 6875, 10094, 25782, 219899, 149603, 8208, 23636, 51493, 23637, 1434, 1432, 22919, 51499, 25778, 6895, 57223, 79828, 6888, 57221, 84886, 22927, 6470, 5347, 8239, 1849, 6472, 6478, 1848, 6477, 388228, 1445, 23625, …	6573	3882	13285	1.07045	9.4131e-05	4.95449e-06	0.000228435
GOTERM_BP_DIRECT	GO:0006413~translational initiation	91	1.35578	1.56039e-07	11224, 6122, 27161, 6160, 6124, 10209, 6125, 6161, 83939, 6164, 6205, 6206, 6165, 6208, 8672, 6168, 6209, 6167, 6169, 10480, 2197, 8668, 1974, 27335, 3921, 84285, 6217, 6155, 23, 23367, 6159, 3692, 6158, 6157, 7311, 6156, 1982, 123263, 1983, 1981, 25873, 6224, 6223, 6222, 6191, 3646, 6193, 6194, 26986, 6181, 6147, 6141, 6143, 4736, 9669, 6188, 6187, 8894, 8893, 54505, 6138, 6137, 6134, 6171, 6135…	5906	123	11756	1.47266	0.00124239	0.000207173	0.000311511
UP_KEYWORDS	Zinc-finger	816	12.1573	2.7842e-07	80742, 330, 331, 25799, 90233, 147947, 79088, 85463, 741, 6093, 84289, 55223, 84282, 118987, 8028, 7337, 546, 8411, 149603, 84085, 374655, 8242, 2971, 2972, 85441, 6478, 6477, 79830, 8427, 329, 284695, 79836, 100101467, 22909, 10743, 2960, 84878, 85451, 51283, 84872, 2967, 7597, 55900, 55905, 146198, 7596, 55904, 27164, 7592, 79845, 55279, 51274, 8462, 55274, 5326, 5325, 5324, 10062, 5134, 90204,…	6573	1464	13285	1.12654	0.000169822	8.49177e-06	0.000412134
GOTERM_BP_DIRECT	GO:0000122~negative regulation of transcription from RNA polymerase II promoter	366	5.45292	4.97704e-07	4799, 170959, 7494, 3087, 4204, 2005, 7753, 4205, 3720, 23512, 3280, 3476, 59348, 3281, 6208, 3727, 3726, 8320, 1822, 51176, 8325, 10614, 4212, 29128, 8878, 84678, 7161, 6498, 6497, 1482, 6495, 171023, 57761, 4488, 6493, 1488, 1487, 55758, 7743, 79718, 3096, 339344, 3297, 79813, 6879, 10472, 7071, 6608, 8726, 8725, 342371, 1810, 4221, 6778, 4790, 2022, 4609, 51592, 54880, 7227, 4774, 55729, 7329,…	5906	609	11756	1.19627	0.00395736	0.000566298	0.000993594
INTERPRO	IPR013083:Zinc finger, RING/FYVE/PHD-type	235	3.50119	5.6054e-07	10206, 10616, 10612, 29128, 84678, 51773, 23133, 54894, 84289, 27072, 10336, 55223, 23503, 4214, 84282, 8028, 81847, 26001, 55658, 8315, 546, 8411, 149603, 7737, 11083, 5253, 8242, 51592, 81559, 7189, 7187, 7186, 55521, 23295, 221687, 7726, 6478, 6477, 90933, 23522, 55870, 79836, 51588, 10210, 23001, 2960, 79443, 51283, 10600, 56907, 64795, 23030, 55905, 55904, 7844, 3621, 3622, 79845, 51136, 258…	6212	377	12512	1.25551	0.00307823	0.00307823	0.00107744
GOTERM_BP_DIRECT	GO:0070125~mitochondrial translational elongation	62	0.923719	1.54314e-06	122704, 51373, 51081, 28977, 9553, 90480, 28973, 124995, 740, 128308, 118487, 64981, 84340, 54998, 55052, 6150, 64432, 7284, 3396, 63931, 60488, 54460, 64975, 51264, 64928, 10102, 64979, 65005, 85476, 29074, 79590, 65008, 84545, 55037, 6182, 9801, 51650, 6183, 65080, 51021, 54534, 28998, 55168, 64969, 64968, 64963, 51253, 64960, 51258, 29088, 63875, 10884, 65993, 64949, 51073, 116541, 26589, 7818…	5906	80	11756	1.54265	0.0122189	0.0015356	0.00308062
GOTERM_BP_DIRECT	GO:0045892~negative regulation of transcription, DNA-templated	258	3.84386	1.61727e-06	3725, 3087, 4204, 3720, 3280, 332, 59348, 221937, 8321, 51176, 10614, 7067, 51773, 605, 1482, 57761, 4488, 1488, 1487, 79813, 133522, 10472, 6879, 7071, 8726, 7342, 55366, 7341, 4221, 2023, 11331, 8242, 51592, 54880, 58487, 51497, 55729, 138151, 23532, 8861, 51193, 7329, 27086, 81559, 55922, 7189, 7040, 163126, 23013, 1998, 253461, 57616, 23119, 3399, 7727, 1999, 149951, 49854, 811, 8427, 23522, …	5906	418	11756	1.2286	0.0128021	0.00143062	0.00322861
GOTERM_CC_DIRECT	GO:0005739~mitochondrion	658	9.80334	1.93238e-06	84277, 23659, 2002, 84273, 84274, 1312, 10899, 22906, 2950, 1727, 25793, 8737, 740, 2011, 1723, 10714, 79810, 79714, 23645, 27079, 55361, 1327, 63931, 207, 5366, 123263, 540, 8729, 63929, 8725, 85476, 80724, 84890, 8209, 23786, 823, 5250, 215, 23530, 1432, 1431, 51495, 57226, 219, 51499, 27089, 513, 1841, 22921, 256643, 6470, 622, 84196, 51295, 6472, 8443, 84881, 516, 515, 401505, 328, 5245, 1088…	6202	1168	12453	1.13116	0.00241449	0.000268565	0.00314015
GOTERM_CC_DIRECT	GO:0030529~intracellular ribonucleoprotein complex	89	1.32598	2.11061e-06	11052, 51538, 51574, 7538, 9343, 27161, 6124, 1938, 6125, 55132, 79048, 124995, 220988, 3191, 3192, 81, 3190, 10658, 23020, 1859, 678, 677, 6738, 672, 10236, 26523, 6155, 1660, 8629, 5036, 64975, 1653, 7884, 3182, 3183, 8826, 3184, 1655, 3185, 55323, 10146, 6191, 3181, 4691, 10432, 6193, 2058, 6194, 26986, 23636, 3609, 9908, 1452, 3608, 7514, 9987, 1454, 22794, 3508, 2932, 8761, 149986, 3312, 111…	6202	125	12453	1.42963	0.00263689	0.000264003	0.00342977
UP_KEYWORDS	Serine/threonine-protein kinase	205	3.05423	4.44172e-06	146057, 54101, 8317, 6872, 157, 156, 11329, 8737, 2011, 23139, 6093, 8408, 204851, 4214, 4215, 83903, 4216, 6885, 149420, 207, 208, 9874, 7204, 440275, 1456, 1453, 1452, 1432, 1455, 1454, 25778, 23012, 5347, 8444, 7046, 8445, 10733, 375449, 83732, 9891, 388228, 8428, 65267, 65268, 55872, 23387, 817, 818, 65125, 10494, 150094, 613, 10746, 83931, 2580, 5128, 23031, 5127, 23235, 983, 2475, 65018, 70…	6573	331	13285	1.25177	0.00270579	0.000129013	0.00657472
GOTERM_BP_DIRECT	GO:0000209~protein polyubiquitination	114	1.69845	5.13392e-06	57674, 26263, 6872, 9861, 10616, 27339, 25820, 79791, 9354, 22888, 26001, 55658, 80176, 84937, 5930, 57154, 8945, 118424, 10425, 7189, 7332, 23198, 55521, 10277, 23295, 23328, 7336, 10013, 1643, 23327, 6478, 6477, 51514, 4012, 57542, 596, 55072, 329, 7316, 23623, 10210, 10075, 7321, 997, 7324, 7322, 7323, 51283, 127544, 151636, 55905, 10193, 79845, 5686, 5685, 5684, 5683, 25897, 10197, 23759, 562…	5906	168	11756	1.35071	0.0400768	0.00408185	0.0102487
UP_SEQ_FEATURE	compositionally biased region:Pro-rich	433	6.45113	5.68373e-06	8880, 29123, 90135, 80742, 3280, 23513, 221935, 6872, 221937, 197407, 745, 51176, 64689, 607, 79080, 8871, 23500, 23648, 118987, 23505, 339344, 5364, 8729, 26003, 8867, 11083, 80728, 374655, 5253, 57224, 55114, 80856, 10081, 375449, 388228, 23524, 79834, 55201, 8045, 84876, 85456, 610, 84878, 10749, 8848, 84872, 85358, 6599, 55135, 79848, 55904, 23558, 339983, 404093, 84034, 51274, 2245, 10657, 5…	6537	753	13191	1.16036	0.0627988	0.0319085	0.0117549
GOTERM_MF_DIRECT	GO:0008139~nuclear localization sequence binding	22	0.327771	6.25076e-06	8021, 23534, 26953, 3837, 3836, 3839, 3838, 9818, 100101267, 3843, 30000, 3842, 3841, 23633, 79711, 3840, 9883, 4928, 8315, 9972, 9670, 4792	5973	22	11857	1.9851	0.0165265	0.00166507	0.011107
[truncated: 835 more rows]

## Sheet: YTHDF2
Category	Term	Count	%	PValue	Genes	List Total	Pop Hits	Pop Total	Fold Enrichment	Bonferroni	Benjamini	FDR
[truncated: 884 more rows]

## Sheet: YTHDF3
Category	Term	Count	%	PValue	Genes	List Total	Pop Hits	Pop Total	Fold Enrichment	Bonferroni	Benjamini	FDR
[truncated: 739 more rows]

[truncated: 1 more sheets: EIF3A]
